# Supplementary material
Source: PubMed Central journal article supplement (PMC3357069)
Supplement: NIHMS370410-supplement-3.pdf [file NIHMS370410-supplement-3.pdf]

## List of Supplementary Tables

**Supplementary Table 3. Genes induced by Ox-PAPC (40ug/ml, 4hrs) in HAECs by 1.5 fold.**

**Supplementary Table 4. Categories of genes induced by Ox-PAPC by 1.5 fold in HAECs.**

**Supplementary Table 5. Genes induced by Ox-PAPC by 1.5 fold and the induction was reversed by 1.2 fold by ADAM10 silencing.**

**Supplementary Table 6. Categories of gene induced by Ox-PAPC by 1.5 fold and the induction was reversed by 1.2 fold by ADAM10 silencing.**

**Supplementary Table 7. Genes inhibited by Ox-PAPC (50ug/ml, 4hrs) in HAECs by 1.5 fold.**

**Supplementary Table 8. Categories of genes inhibited by Ox-PAPC by 1.5 fold in HAECs.**

**Supplementary Table 9. Genes inhibited by Ox-PAPC by 1.5 fold and the inhibition was reversed by ADAM10 silencing by 1.2 fold.**

**Supplementary Table 10. Categories of genes inhibited by Ox-PAPC by 1.5 fold and the inhibition was reversed by ADAM10 silencing by 1.2 fold.**

**Supplementary Table 3. Genes induced by Ox-PAPC (40ug/ml, 4hrs) in HAECS by 1.5 fold.**

Values are represented as log2 scale.

| ProbeSetID  | Gene.Symbol       | log2(sc+C)  | log2(sc+Ox40) | log2(ADAM10si+C) | log2(ADAM10si+Ox50) | cutoff by log2(1.5) |  | log2[(ADAM10si+Ox40)/<br>(ADAM10si+C)] | The effects ADAM10si on Fold<br>induction by Ox40 (H-G) |
|-------------|-------------------|-------------|---------------|------------------|---------------------|---------------------|--|----------------------------------------|---------------------------------------------------------|
|             |                   |             |               |                  |                     | Fold induction      |  |                                        |                                                         |
| 219270_at   | CHAC1             | 4.803703742 | 8.198312686   | 5.385948444      | 8.006949548         | <b>3.394608944</b>  |  | 2.621001104                            | -0.773607839                                            |
| 219475_at   | OSGIN1            | 3.995688686 | 7.268037665   | 3.882302196      | 6.714567231         | <b>3.272348979</b>  |  | 2.832265035                            | -0.440083944                                            |
| 221841_s_at | KLF4              | 4.017792971 | 7.190641298   | 4.487485295      | 7.681254381         | <b>3.172848327</b>  |  | 3.193769086                            | 0.020920759                                             |
| 202672_s_at | ATF3              | 6.659700456 | 9.828723785   | 6.748311257      | 9.785887857         | <b>3.169023329</b>  |  | 3.0375766                              | -0.131446729                                            |
| 204748_at   | PTGS2             | 7.097004713 | 10.20680854   | 7.888435709      | 10.65440501         | <b>3.109803831</b>  |  | 2.765969301                            | -0.34383453                                             |
| 210118_s_at | IL1A              | 4.615137895 | 7.368468764   | 6.096681246      | 8.178840689         | <b>2.753330869</b>  |  | 2.082159442                            | -0.671171427                                            |
| 219371_s_at | KLF2              | 5.781491767 | 8.32906882    | 6.392785262      | 8.049214092         | <b>2.547577053</b>  |  | 1.65642883                             | -0.891148223                                            |
| 201195_s_at | SLC7A5            | 5.943054797 | 8.420933332   | 6.652820379      | 8.456062926         | <b>2.477878535</b>  |  | 1.803242546                            | -0.674635989                                            |
| 203438_at   | STC2              | 6.460635532 | 8.884899541   | 6.985337525      | 8.427216885         | <b>2.424264009</b>  |  | 1.44187936                             | -0.982384649                                            |
| 203665_at   | HMOX1             | 9.991974246 | 12.39845324   | 9.273143534      | 12.29486364         | <b>2.406478996</b>  |  | 3.021720102                            | 0.615241107                                             |
| 220266_s_at | KLF4              | 3.327283865 | 5.638876011   | 3.434915178      | 5.99137933          | <b>2.311592146</b>  |  | 2.556464152                            | 0.244872006                                             |
| 207029_at   | KITLG             | 3.151881632 | 5.357321076   | 3.359027062      | 4.275864385         | <b>2.205439444</b>  |  | 0.916837323                            | -1.288602121                                            |
| 211124_s_at | KITLG             | 2.964011187 | 5.155668728   | 3.110940088      | 4.220911211         | <b>2.191657541</b>  |  | 1.109971123                            | -1.081686418                                            |
| 222162_s_at | ADAMTS1           | 7.127516346 | 9.297423055   | 7.882476838      | 9.343380988         | <b>2.169906709</b>  |  | 1.46090415                             | -0.709002559                                            |
| 202241_at   | TRIB1             | 4.524613826 | 6.659960764   | 5.051607393      | 6.90562254          | <b>2.135346938</b>  |  | 1.854015147                            | -0.281331791                                            |
| 218145_at   | TRIB3             | 7.617767845 | 9.743675      | 8.027678792      | 9.582506542         | <b>2.125907155</b>  |  | 1.55482775                             | -0.571079405                                            |
| 205047_s_at | ASNS              | 6.880706694 | 8.878131624   | 6.83699635       | 8.209876714         | <b>1.99742493</b>   |  | 1.372880364                            | -0.624544567                                            |
| 200907_s_at | PALLD             | 6.845936804 | 8.838042951   | 6.949864627      | 8.349376126         | <b>1.992106147</b>  |  | 1.399511499                            | -0.592594648                                            |
| 202581_at   | HSPA1A /// HSPA1B | 6.378141669 | 8.226010579   | 6.285587962      | 8.179144583         | <b>1.84786891</b>   |  | 1.893556621                            | 0.045687711                                             |
| 200897_s_at | PALLD             | 7.538453403 | 9.370555858   | 7.316199841      | 8.773709917         | <b>1.832102455</b>  |  | 1.457510076                            | -0.374592379                                            |
| 200906_s_at | PALLD             | 5.74476219  | 7.56297506    | 5.969141836      | 7.497157284         | <b>1.81821287</b>   |  | 1.528015448                            | -0.290197422                                            |
| 221489_s_at | SPRY4             | 5.020900733 | 6.8263897     | 6.171394812      | 7.242014586         | <b>1.805488968</b>  |  | 1.070619774                            | -0.734869194                                            |
| 200800_s_at | HSPA1A /// HSPA1B | 8.273306436 | 10.03764847   | 8.158319026      | 10.2185278          | <b>1.764342038</b>  |  | 2.060208774                            | 0.295866736                                             |
| 212501_at   | CEBPB             | 7.368199722 | 9.127343051   | 7.803010894      | 8.937675116         | <b>1.759143329</b>  |  | 1.134664222                            | -0.624479107                                            |
| 204823_at   | NAV3              | 7.238248609 | 8.988451277   | 7.334071892      | 8.53976908          | <b>1.750202668</b>  |  | 1.205697188                            | -0.54450548                                             |
| 213112_s_at | SQSTM1            | 6.417749539 | 8.167627466   | 5.842723418      | 7.509443698         | <b>1.749877927</b>  |  | 1.66672028                             | -0.083157647                                            |
| 206942_s_at | PMCH              | 4.003389709 | 5.696800404   | 3.590252153      | 3.899857078         | <b>1.693410695</b>  |  | 0.309604925                            | -1.38380577                                             |
| 204977_at   | DDX10             | 7.724663217 | 9.41372041    | 7.638149622      | 8.793905548         | <b>1.689057193</b>  |  | 1.155755926                            | -0.533301267                                            |
| 205193_at   | MAFF              | 8.155717098 | 9.803938397   | 9.291781409      | 10.46288084         | <b>1.648221299</b>  |  | 1.171099434                            | -0.477121864                                            |
| 211506_s_at | IL8               | 9.982336135 | 11.6083431    | 8.724611639      | 11.23306171         | <b>1.62600696</b>   |  | 2.508450067                            | 0.882443107                                             |
| 209383_at   | DDIT3             | 6.436087749 | 8.05633899    | 6.469105548      | 8.31074763          | <b>1.620251241</b>  |  | 1.841642083                            | 0.221390842                                             |
| 204363_at   | F3                | 4.52562969  | 6.112285987   | 5.00821857       | 6.547386234         | <b>1.586656297</b>  |  | 1.539167663                            | -0.047488634                                            |
| 220655_at   | TNIP3             | 3.546038592 | 5.108458015   | 3.635570626      | 4.513530687         | <b>1.562419423</b>  |  | 0.877960062                            | -0.684459361                                            |
| 201041_s_at | DUSP1             | 7.849153795 | 9.407591251   | 8.389343052      | 9.627746798         | <b>1.558437455</b>  |  | 1.238403747                            | -0.320033708                                            |
| 36711_at    | MAFF              | 9.550314263 | 11.10768707   | 10.5605574       | 11.47075859         | <b>1.557372805</b>  |  | 0.910201187                            | -0.647171618                                            |
| 204285_s_at | PMAI1             | 7.584912955 | 9.133786321   | 8.390146174      | 9.193560124         | <b>1.548873365</b>  |  | 0.80341395                             | -0.745459415                                            |
| 200799_at   | HSPA1A            | 8.682120636 | 10.20093176   | 8.450194861      | 10.23118421         | <b>1.518811128</b>  |  | 1.780989353                            | 0.262178225                                             |
| 201044_x_at | DUSP1             | 4.133257166 | 5.638476273   | 4.612788748      | 5.909849741         | <b>1.505219107</b>  |  | 1.297060993                            | -0.208158114                                            |
| 209457_at   | DUSP5             | 6.027687755 | 7.5202526     | 6.001241743      | 7.365449368         | <b>1.492564845</b>  |  | 1.364207625                            | -0.12835722                                             |
| 202887_s_at | DDIT4             | 8.258191832 | 9.708188437   | 8.553813129      | 9.652333405         | <b>1.449996605</b>  |  | 1.098520276                            | -0.351476329                                            |
| 202014_at   | PPP1R15A          | 7.844319198 | 9.291631465   | 8.066037616      | 9.459148674         | <b>1.447312268</b>  |  | 1.393111058                            | -0.05420121                                             |
| 37028_at    | PPP1R15A          | 8.046292648 | 9.487122439   | 8.367028875      | 9.741154735         | <b>1.440829791</b>  |  | 1.37412586                             | -0.06670393                                             |
| 203925_at   | GCLM              | 9.54680657  | 10.98307426   | 9.121337026      | 10.48324519         | <b>1.436267687</b>  |  | 1.361908168                            | -0.07435952                                             |

|             |          |             |             |             |             |                    |             |              |
|-------------|----------|-------------|-------------|-------------|-------------|--------------------|-------------|--------------|
| 209850_s_at | CDC42EP2 | 5.402179937 | 6.794284898 | 5.778767564 | 7.031876471 | <b>1.392104962</b> | 1.253108906 | -0.138996055 |
| 201694_s_at | EGR1     | 6.059755078 | 7.440331573 | 6.192773846 | 7.549859632 | <b>1.380576495</b> | 1.357085786 | -0.02349071  |
| 217173_s_at | LDLR     | 5.377604472 | 6.756737979 | 4.677621919 | 6.615407239 | <b>1.379133507</b> | 1.93778532  | 0.558651813  |
| 205463_s_at | PDGFA    | 5.987412264 | 7.365871619 | 5.815323313 | 7.426928301 | <b>1.378459355</b> | 1.611604988 | 0.233145633  |
| 204286_s_at | PMAIP1   | 6.10257409  | 7.479016111 | 6.318293861 | 7.31927861  | <b>1.376442021</b> | 1.00098475  | -0.375457271 |
| 216466_at   | NAV3     | 3.371634502 | 4.738998481 | 3.290180084 | 4.620706048 | <b>1.367363979</b> | 1.330525964 | -0.036838015 |
| 207528_s_at | SLC7A11  | 6.905154874 | 8.271923662 | 6.564274654 | 7.862093839 | <b>1.366768789</b> | 1.297819185 | -0.068949604 |
| 202068_s_at | LDLR     | 7.888751546 | 9.255385501 | 7.220328977 | 9.103519234 | <b>1.366633955</b> | 1.883190257 | 0.516556302  |
| 202847_at   | PCK2     | 6.042034131 | 7.393921132 | 6.166758246 | 7.252837652 | <b>1.351887002</b> | 1.086079406 | -0.265807596 |
| 220892_s_at | PSAT1    | 6.729436491 | 8.062018562 | 6.833180385 | 7.627260539 | <b>1.332582072</b> | 0.794080155 | -0.538501917 |
| 214014_at   | CDC42EP2 | 4.372255081 | 5.693698349 | 4.604397487 | 5.813893848 | <b>1.321443268</b> | 1.209496361 | -0.111946907 |
| 203349_s_at | ETV5     | 5.845109733 | 7.161735469 | 6.673321868 | 7.460053067 | <b>1.316625736</b> | 0.786731199 | -0.529894537 |
| 220955_x_at | RAB23    | 6.149432173 | 7.457611417 | 6.300507819 | 7.508238501 | <b>1.308179244</b> | 1.207730682 | -0.100448562 |
| 204341_at   | TRIM16   | 7.689668753 | 8.996536156 | 7.220336703 | 8.115015753 | <b>1.306867403</b> | 0.894679051 | -0.412188352 |
| 221371_at   | TNFSF18  | 7.800580675 | 9.101611872 | 7.603451668 | 8.814589217 | <b>1.301031197</b> | 1.211137549 | -0.089893647 |
| 210538_s_at | BIRC3    | 4.726490967 | 6.023350114 | 3.964674114 | 5.113062339 | <b>1.296859147</b> | 1.148388225 | -0.148470922 |
| 212290_at   | SLC7A1   | 5.056550354 | 6.351847006 | 5.555100963 | 6.576485316 | <b>1.295296652</b> | 1.021384354 | -0.273912298 |
| 202067_s_at | LDLR     | 6.56078292  | 7.833967023 | 5.800173809 | 7.648151531 | <b>1.273184103</b> | 1.847977722 | 0.574793619  |
| 202147_s_at | IFRD1    | 5.987024455 | 7.25296117  | 5.933253205 | 7.234538119 | <b>1.265936715</b> | 1.301284915 | 0.035348199  |
| 212295_s_at | SLC7A1   | 9.097856178 | 10.35089404 | 9.368853225 | 10.26061381 | <b>1.253037859</b> | 0.891760582 | -0.361277277 |
| 215253_s_at | RCAN1    | 4.641582605 | 5.891784653 | 4.723788598 | 5.822058823 | <b>1.250202048</b> | 1.098270225 | -0.151931823 |
| 208230_s_at | NRG1     | 5.611029387 | 6.85550089  | 5.746318853 | 6.893793705 | <b>1.244471503</b> | 1.147474853 | -0.09699665  |
| 206765_at   | KCNJ2    | 6.685117747 | 7.927117803 | 6.756573392 | 7.174655082 | <b>1.242000057</b> | 0.41808169  | -0.823918367 |
| 206237_s_at | NRG1     | 7.512481557 | 8.747038747 | 7.659678477 | 8.790071247 | <b>1.23455719</b>  | 1.13039277  | -0.10416442  |
| 204495_s_at | C15orf39 | 5.036629764 | 6.267022478 | 5.299199414 | 6.317532337 | <b>1.230392713</b> | 1.018332923 | -0.212059791 |
| 201761_at   | MTHFD2   | 8.574370636 | 9.803732099 | 8.854332694 | 9.565177728 | <b>1.229361462</b> | 0.710845033 | -0.518516429 |
| 202146_at   | IFRD1    | 7.107730661 | 8.33481698  | 6.975430893 | 8.298043759 | <b>1.227086319</b> | 1.322612866 | 0.095526547  |
| 204970_s_at | MAFG     | 6.16811373  | 7.368066595 | 6.535323666 | 7.294971121 | <b>1.199952865</b> | 0.759647455 | -0.44030541  |
| 211668_s_at | PLAU     | 6.053880153 | 7.24674174  | 5.833346757 | 6.743180772 | <b>1.192861588</b> | 0.909834015 | -0.283027573 |
| 210845_s_at | PLAU     | 6.549023425 | 7.741737337 | 7.538951628 | 8.177979681 | <b>1.192713913</b> | 0.638846053 | -0.55386786  |
| 202679_at   | NPC1     | 7.511201564 | 8.702067305 | 7.7351651   | 8.765200777 | <b>1.190865741</b> | 1.030035677 | -0.160830065 |
| 214696_at   | C17orf91 | 8.75698586  | 9.944112643 | 8.819470133 | 9.747474276 | <b>1.187126783</b> | 0.928004143 | -0.25912264  |
| 205207_at   | IL6      | 7.985424626 | 9.158568637 | 7.934905395 | 9.607110465 | <b>1.173144011</b> | 1.672205071 | 0.49906106   |
| 212722_s_at | JMJD6    | 5.868131667 | 7.036888788 | 6.263054354 | 7.316771573 | <b>1.168757121</b> | 1.053717219 | -0.115039902 |
| 211924_s_at | PLAU     | 7.026525418 | 8.190238001 | 8.03048998  | 8.509269875 | <b>1.163712583</b> | 0.478779894 | -0.684932689 |
| 203439_s_at | STC2     | 5.572923946 | 6.735232101 | 6.006554844 | 6.528358902 | <b>1.162308155</b> | 0.521804059 | -0.640504096 |
| 202207_at   | ARL4C    | 3.781792594 | 4.940814809 | 4.37749579  | 5.147552545 | <b>1.159022216</b> | 0.770056755 | -0.388965461 |
| 200924_s_at | SLC3A2   | 7.228586145 | 8.381770666 | 6.998165446 | 8.359894777 | <b>1.153184521</b> | 1.361729331 | 0.20854481   |
| 210512_s_at | VEGFA    | 6.3412984   | 7.481072406 | 6.379017202 | 7.250435848 | <b>1.139774005</b> | 0.871418645 | -0.26835536  |
| 201625_s_at | INSIG1   | 4.94691553  | 6.084976611 | 4.703862105 | 5.959489779 | <b>1.13806108</b>  | 1.255627674 | 0.117566594  |
| 205931_s_at | CREB5    | 3.579397309 | 4.714042283 | 3.650587293 | 4.630615034 | <b>1.134644974</b> | 0.980027741 | -0.154617233 |
| 205659_at   | HDAC9    | 6.193253522 | 7.327193991 | 6.852609937 | 7.821652989 | <b>1.133940469</b> | 0.969043052 | -0.164897417 |
| 205547_s_at | TAGLN    | 7.629521032 | 8.756715382 | 7.681911099 | 8.214031737 | <b>1.12719435</b>  | 0.532120639 | -0.595073711 |
| 201170_s_at | BHLHE40  | 4.855815262 | 5.982113332 | 5.312291547 | 6.275574038 | <b>1.12629807</b>  | 0.963282491 | -0.488105929 |
| 201466_s_at | JUN      | 7.594421865 | 8.716922727 | 8.004132596 | 8.881430187 | <b>1.122500863</b> | 0.877297591 | -0.245203272 |
| 213895_at   | EMP1     | 6.019047081 | 7.13740129  | 6.37417122  | 7.106376554 | <b>1.11835421</b>  | 0.732205334 | -0.386148875 |
| 206715_at   | TFEC     | 6.387204682 | 7.503321741 | 7.003905602 | 7.48111301  | <b>1.116117059</b> | 0.477224498 | -0.638892561 |
| 204224_s_at | GCH1     | 6.778943623 | 7.89430718  | 7.115325085 | 7.742587721 | <b>1.115363557</b> | 0.627262636 | -0.488100921 |
| 204011_at   | SPRY2    | 7.219994508 | 8.319706598 | 7.79789932  | 8.739675247 | <b>1.09971209</b>  | 0.941775926 | -0.157936164 |
| 204203_at   | CEBPG    | 6.825894513 | 7.923400628 | 7.050643407 | 7.749652528 | <b>1.097506115</b> | 0.699009121 | -0.398496993 |

|             |                    |             |             |             |             |                    |             |              |
|-------------|--------------------|-------------|-------------|-------------|-------------|--------------------|-------------|--------------|
| 210139_s_at | PMP22              | 9.133708107 | 10.23016622 | 9.684054396 | 10.10281248 | <b>1.096458117</b> | 0.418758087 | -0.677700029 |
| 203574_at   | NFIL3              | 6.809116276 | 7.901970852 | 6.907849951 | 7.81297271  | <b>1.092854577</b> | 0.905122759 | -0.187731817 |
| 204420_at   | FOSL1              | 7.180282775 | 8.2662772   | 7.694623763 | 8.309649068 | <b>1.085994425</b> | 0.615025305 | -0.47096912  |
| 215401_at   | ---                | 3.38800449  | 4.468679005 | 3.378783178 | 4.391153345 | <b>1.080674515</b> | 1.012370166 | -0.068304349 |
| 202393_s_at | KLF10              | 7.817420422 | 8.893599645 | 7.920048332 | 8.831780965 | <b>1.076179223</b> | 0.911732633 | -0.16444659  |
| 218691_s_at | PDILIM4            | 4.225373591 | 5.290098752 | 4.569204248 | 5.195238662 | <b>1.064725162</b> | 0.626034414 | -0.438690747 |
| 200670_at   | XBP1               | 6.332170663 | 7.390437723 | 6.520149924 | 7.151337181 | <b>1.05826706</b>  | 0.631187257 | -0.427079803 |
| 222016_s_at | ZNF323             | 8.227284055 | 9.283390722 | 7.525805418 | 8.708055997 | <b>1.056106667</b> | 1.182250579 | 0.126143912  |
| 201626_at   | INSIG1             | 7.688680779 | 8.743785248 | 7.254154993 | 8.784264562 | <b>1.055104469</b> | 1.530109569 | 0.4750051    |
| 211434_s_at | CCRL2              | 4.467928142 | 5.519258552 | 5.047090218 | 5.639408765 | <b>1.051330411</b> | 0.592318547 | -0.459011863 |
| 201465_s_at | JUN                | 6.641914558 | 7.691346854 | 7.211515081 | 8.092734861 | <b>1.049432296</b> | 0.88121978  | -0.168212516 |
| 208241_at   | NRG1               | 6.211075762 | 7.252763915 | 5.91626135  | 7.166258911 | <b>1.041688154</b> | 1.249997561 | 0.208309408  |
| 200632_s_at | NRDG1              | 7.773793717 | 8.812785805 | 7.727421789 | 8.73844028  | <b>1.038992088</b> | 1.01101849  | -0.027973598 |
| 203723_at   | ITPKB              | 7.012316796 | 8.050603134 | 7.787351944 | 8.469368696 | <b>1.038286338</b> | 0.682016752 | -0.356269587 |
| 203467_at   | PMM1               | 4.734778371 | 5.76624775  | 4.855009233 | 5.894884395 | <b>1.031469378</b> | 1.039875163 | 0.008405784  |
| 218881_s_at | FOSL2              | 5.393612636 | 6.422407589 | 5.123916641 | 6.099566838 | <b>1.028794954</b> | 0.975650197 | -0.053144757 |
| 208370_s_at | RCAN1              | 6.001844218 | 7.028068149 | 6.084739347 | 6.971473859 | <b>1.026223931</b> | 0.886734511 | -0.139489419 |
| 202081_at   | IER2               | 8.318471555 | 9.337610795 | 8.363879849 | 9.410352155 | <b>1.019139241</b> | 1.046472306 | 0.027333066  |
| 209884_s_at | SLC4A7             | 5.301351306 | 6.309792247 | 5.879052898 | 6.629486086 | <b>1.008440941</b> | 0.750433188 | -0.258007753 |
| 210190_at   | STX11              | 3.725533203 | 4.728598892 | 3.957635613 | 4.78857307  | <b>1.00306569</b>  | 0.830937458 | -0.172128232 |
| 205379_at   | CBR3               | 7.316516588 | 8.317244669 | 6.723157917 | 7.56910253  | <b>1.000728081</b> | 0.845944613 | -0.154783469 |
| 209287_s_at | CDC42EP3           | 6.241207554 | 7.227174376 | 7.245292533 | 7.737206251 | <b>0.985968822</b> | 0.491913718 | -0.494053104 |
| 201693_s_at | EGR1               | 3.863294812 | 4.848281148 | 4.051680691 | 4.818669168 | <b>0.984986336</b> | 0.766988477 | -0.217997858 |
| 204194_at   | BACH1              | 4.32878418  | 5.31311595  | 4.490123835 | 5.132959592 | <b>0.984331769</b> | 0.642835757 | -0.341496012 |
| 200664_s_at | DNAJB1             | 7.321840294 | 8.305465524 | 7.331704555 | 8.423756621 | <b>0.98362523</b>  | 1.092052066 | 0.108426836  |
| 209631_s_at | GPR37              | 3.656039313 | 4.638850004 | 4.094111104 | 4.840141853 | <b>0.982810691</b> | 0.746030749 | -0.236779943 |
| 218880_at   | FOSL2              | 5.771544389 | 6.752342252 | 5.731571471 | 6.534562723 | <b>0.980797864</b> | 0.802991253 | -0.177806611 |
| 212374_at   | FEM1B              | 4.900966422 | 5.881253079 | 4.976064418 | 6.05538158  | <b>0.980286657</b> | 1.079317162 | 0.099030506  |
| 222235_s_at | CSGALNACT2 /// LOC | 6.285414778 | 7.265632094 | 7.033735665 | 7.828453793 | <b>0.980217316</b> | 0.794718128 | -0.185499188 |
| 208231_at   | NRG1               | 3.831196113 | 4.809965189 | 3.640125816 | 4.62564282  | <b>0.978769076</b> | 1.012517004 | 0.033747928  |
| 201627_s_at | INSIG1             | 7.31822636  | 8.296018753 | 6.899567856 | 8.237175226 | <b>0.977792393</b> | 1.33760737  | 0.359814978  |
| 204614_at   | SERPIN2            | 9.664535705 | 10.64232257 | 9.546940959 | 10.35228361 | <b>0.977786869</b> | 0.805342648 | -0.172444221 |
| 205680_at   | MMP10              | 7.402322403 | 8.379593845 | 8.580563544 | 8.850461783 | <b>0.977271442</b> | 0.269898239 | -0.707373204 |
| 208025_s_at | HMGA2              | 6.195136142 | 7.171297679 | 7.734954416 | 8.131786342 | <b>0.976161537</b> | 0.396831926 | -0.579329611 |
| 208078_s_at | SIK1               | 4.43870402  | 5.414541099 | 4.60956213  | 5.591750338 | <b>0.97583708</b>  | 0.982188208 | 0.006351129  |
| 208960_s_at | KLF6               | 8.504437246 | 9.478188711 | 8.712865552 | 9.824286416 | <b>0.973751465</b> | 1.111420864 | 0.137669399  |
| 205479_s_at | PLAU               | 5.286687084 | 6.259863672 | 5.091624636 | 5.901557413 | <b>0.973176589</b> | 0.809932777 | -0.163243812 |
| 204494_s_at | C15orf39           | 4.135587081 | 5.107478407 | 4.429519852 | 5.286678308 | <b>0.971891326</b> | 0.857158456 | -0.11473287  |
| 205770_at   | GSR                | 6.988649993 | 7.955545341 | 6.974578035 | 7.596648486 | <b>0.966895349</b> | 0.622070451 | -0.344824897 |
| 203348_s_at | ETV5               | 5.302752492 | 6.267597358 | 5.90228593  | 6.782813379 | <b>0.964844866</b> | 0.880527449 | -0.084317417 |
| 213407_at   | PHLPP2             | 5.64217685  | 6.602435927 | 5.830244131 | 6.769229723 | <b>0.960259077</b> | 0.938985591 | -0.021273486 |
| 214967_at   | ---                | 4.223105    | 5.18087394  | 3.994114421 | 5.265541574 | <b>0.95776894</b>  | 1.271427153 | 0.313658213  |
| 206917_at   | GNA13              | 5.297767046 | 6.253232755 | 4.61879072  | 5.605917306 | <b>0.955465709</b> | 0.987126586 | 0.031660877  |
| 200666_s_at | DNAJB1             | 7.612700953 | 8.55939886  | 7.603938866 | 8.994223396 | <b>0.946697708</b> | 1.39028453  | 0.443586822  |
| 214844_s_at | DOK5               | 6.805299893 | 7.746667834 | 6.755061336 | 7.347706089 | <b>0.941367941</b> | 0.592644754 | -0.348723188 |
| 217127_at   | CTH                | 3.674204336 | 4.614734359 | 3.518038347 | 4.129348444 | <b>0.940530023</b> | 0.611310096 | -0.329219927 |
| 209882_at   | RIT1               | 8.2249714   | 9.165417682 | 8.20907207  | 9.053024868 | <b>0.940446282</b> | 0.843952799 | -0.096493483 |
| 202859_x_at | IL8                | 11.51681028 | 12.45254928 | 10.7617759  | 12.28037408 | <b>0.935739</b>    | 1.518598173 | 0.582859173  |
| 209406_at   | BAG2               | 6.122166806 | 7.057767721 | 5.907454835 | 6.309792085 | <b>0.935600914</b> | 0.40233725  | -0.533263665 |
| 213672_at   | MARS               | 5.124895166 | 6.05963948  | 5.36605773  | 6.266527181 | <b>0.934744314</b> | 0.900469451 | -0.034274863 |

|             |                     |             |             |             |             |                    |              |              |
|-------------|---------------------|-------------|-------------|-------------|-------------|--------------------|--------------|--------------|
| 201471_s_at | SQSTM1              | 10.72571472 | 11.65455853 | 10.20001846 | 11.24350503 | <b>0.928843812</b> | 1.04348657   | 0.114642758  |
| 202150_s_at | NEDD9               | 6.831145603 | 7.759358576 | 7.651236564 | 8.340308932 | <b>0.928212973</b> | 0.689072369  | -0.239140604 |
| 218651_s_at | LARP6               | 5.391296221 | 6.313956349 | 5.625250113 | 6.556164352 | <b>0.922660127</b> | 0.930914239  | 0.008254112  |
| 212723_at   | JMJD6               | 7.409357756 | 8.329881485 | 7.590255742 | 8.582155788 | <b>0.920523729</b> | 0.991900046  | 0.071376317  |
| 204141_at   | TUBB2A              | 8.479040055 | 9.399264128 | 8.426143942 | 9.064470241 | <b>0.920224073</b> | 0.638326299  | -0.281897774 |
| 209355_s_at | PPAP2B              | 6.320122587 | 7.237775579 | 7.198100107 | 7.513844288 | <b>0.917652992</b> | 0.315744182  | -0.60190881  |
| 212171_x_at | VEGFA               | 5.46880831  | 6.386187447 | 5.640749003 | 6.3513025   | <b>0.917379137</b> | 0.710553497  | -0.206825641 |
| 210513_s_at | VEGFA               | 3.670938708 | 4.587294381 | 3.787147008 | 4.420561738 | <b>0.916355673</b> | 0.63341473   | -0.282940943 |
| 202149_at   | NEDD9               | 7.73425997  | 8.6473137   | 8.576233843 | 8.94643391  | <b>0.91305373</b>  | 0.370200067  | -0.542853663 |
| 214326_x_at | JUND                | 5.303261842 | 6.215640746 | 5.216998203 | 5.973528229 | <b>0.912378904</b> | 0.756530026  | -0.155848878 |
| 202459_s_at | LPIN2               | 5.700299162 | 6.608100145 | 6.042186483 | 6.70474116  | <b>0.907800983</b> | 0.662554677  | -0.245246305 |
| 219908_at   | DKK2                | 3.622643313 | 4.528405227 | 3.43654688  | 3.337783196 | <b>0.905761915</b> | -0.098763658 | -1.004525599 |
| 208744_x_at | HSPH1               | 8.893101067 | 9.796726173 | 8.923039069 | 9.938777431 | <b>0.903625106</b> | 1.015738362  | 0.112113257  |
| 201695_s_at | PNP                 | 9.419443088 | 10.31951309 | 9.588057862 | 10.26347497 | <b>0.900070006</b> | 0.675417105  | -0.224652901 |
| 221577_x_at | GDF15 /// LOC100292 | 10.5359737  | 11.43321061 | 10.82576031 | 11.72309283 | <b>0.897236903</b> | 0.897332513  | 9.561E-05    |
| 201325_s_at | EMP1                | 9.341950038 | 10.23589601 | 9.798803109 | 10.31648087 | <b>0.893945969</b> | 0.517677761  | -0.376268208 |
| 203751_x_at | JUND                | 4.650385364 | 5.543970863 | 4.454695083 | 5.405962371 | <b>0.893585499</b> | 0.951267288  | 0.057681789  |
| 205579_at   | HRH1                | 5.183012855 | 6.076330241 | 5.059870271 | 5.985553627 | <b>0.893317386</b> | 0.925683356  | 0.03236597   |
| 207630_s_at | CREM                | 7.220307127 | 8.110051984 | 7.47286968  | 8.124777917 | <b>0.889744858</b> | 0.651908237  | -0.237836621 |
| 208961_s_at | KLF6                | 9.234697468 | 10.11588702 | 9.543230578 | 10.45135921 | <b>0.881189552</b> | 0.908128635  | 0.026939083  |
| 206907_at   | TNFSF9              | 3.696716442 | 4.574198979 | 3.78609545  | 4.374562016 | <b>0.877482537</b> | 0.588466565  | -0.289015972 |
| 212226_s_at | PPAP2B              | 7.174642961 | 8.047572569 | 8.11391829  | 8.277188515 | <b>0.872929608</b> | 0.163270225  | -0.709659383 |
| 209339_at   | SIAH2               | 6.119008541 | 6.986827869 | 6.452028522 | 6.981785414 | <b>0.867819327</b> | 0.529756892  | -0.338062435 |
| 212803_at   | NAB2                | 4.442701378 | 5.309566897 | 4.608350148 | 5.663089349 | <b>0.866865518</b> | 1.054739201  | 0.187873683  |
| 202286_s_at | TACSTD2             | 6.513447758 | 7.376544964 | 6.016039991 | 6.867564421 | <b>0.863097206</b> | 0.851524431  | -0.011572775 |
| 205205_at   | RELB                | 4.803952621 | 5.666936584 | 4.598107959 | 5.632648815 | <b>0.862983963</b> | 1.034540856  | 0.171556893  |
| 205681_at   | BCL2A1              | 4.992185092 | 5.851521673 | 5.657808617 | 6.437367495 | <b>0.859336581</b> | 0.779558878  | -0.079777703 |
| 221752_at   | SSH1                | 8.633678582 | 9.492983373 | 8.866842864 | 9.554003992 | <b>0.859304791</b> | 0.687161128  | -0.172143663 |
| 204334_at   | KLF7                | 7.064042267 | 7.922113496 | 7.260520821 | 7.9887606   | <b>0.858071229</b> | 0.728239779  | -0.12983145  |
| 216375_s_at | LEV5                | 4.212407235 | 5.06556748  | 4.890459933 | 5.305515245 | <b>0.853160245</b> | 0.415055311  | -0.438104933 |
| 204436_at   | PLEKHO2             | 6.410798805 | 7.263129457 | 6.376223638 | 7.37382182  | <b>0.852330652</b> | 0.997598183  | 0.145267531  |
| 204937_s_at | ZNF274              | 7.109208688 | 7.960241467 | 7.363969789 | 8.328191841 | <b>0.851032779</b> | 0.964222052  | 0.113189273  |
| 205746_s_at | ADAM17              | 7.003301711 | 7.853085493 | 6.985068525 | 7.887933691 | <b>0.849783782</b> | 0.902865166  | 0.053081384  |
| 214056_at   | ---                 | 4.753965266 | 5.601291378 | 4.404827423 | 4.971854631 | <b>0.847326112</b> | 0.567027208  | -0.280298904 |
| 212458_at   | SPRED2              | 5.02347773  | 5.869722997 | 5.059387633 | 5.755085793 | <b>0.846245267</b> | 0.695698161  | -0.150547106 |
| 211527_x_at | VEGFA               | 3.752790162 | 4.598739436 | 4.062923235 | 4.37855972  | <b>0.845949273</b> | 0.315636485  | -0.530312788 |
| 209921_at   | SLC7A11             | 10.50488088 | 11.34875332 | 9.911034848 | 10.96059384 | <b>0.843872437</b> | 1.049558992  | 0.205686556  |
| 217678_at   | SLC7A11             | 10.32445149 | 11.16530446 | 9.770085805 | 10.80998875 | <b>0.840852972</b> | 1.039902945  | 0.199049974  |
| 212978_at   | LRRC8B              | 6.825437577 | 7.664169138 | 7.16210165  | 7.854001697 | <b>0.83731561</b>  | 0.691900047  | -0.146831514 |
| 209286_at   | CDC42EP3            | 7.779521495 | 8.61666269  | 8.978583126 | 9.256560852 | <b>0.837141195</b> | 0.277977726  | -0.559163469 |
| 209288_s_at | CDC42EP3            | 7.943967644 | 8.781018739 | 8.932339328 | 9.180414339 | <b>0.837051095</b> | 0.248075011  | -0.588976084 |
| 209193_at   | PIM1                | 3.774072563 | 4.606502718 | 3.805523492 | 4.37083866  | <b>0.832430154</b> | 0.565315167  | -0.267114987 |
| 205580_s_at | HRH1                | 4.736641795 | 5.56729342  | 4.984424677 | 5.81733267  | <b>0.830651625</b> | 0.832907993  | 0.002256368  |
| 215350_at   | SYNE1               | 2.956350604 | 3.784268783 | 2.980206631 | 3.601307194 | <b>0.82791818</b>  | 0.621100563  | -0.206817617 |
| 218522_s_at | MAP1S               | 5.479225573 | 6.30271389  | 6.193585913 | 6.749731996 | <b>0.823488317</b> | 0.556146083  | -0.267342234 |
| 212373_at   | FEM1B               | 5.834772218 | 6.657238302 | 5.659676093 | 6.440325823 | <b>0.822466084</b> | 0.78064973   | -0.041816354 |
| 210286_s_at | SLC4A7              | 3.674941407 | 4.494833351 | 3.776974137 | 4.745344542 | <b>0.819891944</b> | 0.968370405  | 0.148478461  |
| 212230_at   | PPAP2B              | 6.245812238 | 7.065571948 | 6.51548167  | 6.918376405 | <b>0.81975971</b>  | 0.402894735  | -0.416864974 |
| 201920_at   | SLC20A1             | 8.398950711 | 9.214993811 | 9.014125308 | 9.607188854 | <b>0.8160431</b>   | 0.593063547  | -0.222979553 |
| 211031_s_at | CLIP2               | 5.319013744 | 6.134303238 | 5.743680114 | 6.52594826  | <b>0.815289494</b> | 0.782268146  | -0.033021348 |

|             |              |             |             |             |             |                    |              |              |
|-------------|--------------|-------------|-------------|-------------|-------------|--------------------|--------------|--------------|
| 218647_s_at | YRDC         | 6.069270472 | 6.881682343 | 6.54692332  | 7.036645724 | <b>0.812411872</b> | 0.489722404  | -0.322689468 |
| 221753_at   | SSH1         | 7.381827199 | 8.190719885 | 8.045457408 | 8.746607408 | <b>0.808892686</b> | 0.70115      | -0.107742686 |
| 202206_at   | ARL4C        | 3.325334347 | 4.13068286  | 3.690574317 | 4.2388339   | <b>0.805348514</b> | 0.548259583  | -0.257088931 |
| 208893_s_at | DUSP6        | 7.38565978  | 8.188515825 | 7.81743024  | 8.15902572  | <b>0.802856045</b> | 0.34159548   | -0.461260565 |
| 206976_s_at | HSPH1        | 9.07168978  | 9.870619508 | 8.933511614 | 9.815765403 | <b>0.798929729</b> | 0.882253789  | 0.083324061  |
| 201464_x_at | JUN          | 9.127609025 | 9.925629682 | 9.476819329 | 9.998178767 | <b>0.798020658</b> | 0.521359438  | -0.276661219 |
| 212274_at   | LPIN1        | 7.803377004 | 8.601048609 | 8.106885155 | 8.767094047 | <b>0.797671605</b> | 0.660208892  | -0.137462712 |
| 217655_at   | LOC100127972 | 3.661397634 | 4.456198764 | 3.649569132 | 4.073067926 | <b>0.794801113</b> | 0.423498795  | -0.371302335 |
| 216017_s_at | NAB2         | 4.114090772 | 4.90599158  | 4.180546136 | 5.155266809 | <b>0.791900808</b> | 0.974720673  | 0.182819865  |
| 209209_s_at | FERMT2       | 8.348797565 | 9.140140632 | 7.389547758 | 8.162842399 | <b>0.791343068</b> | 0.773294642  | -0.018048426 |
| 212860_at   | ZDHH18       | 5.222189108 | 6.006755345 | 5.405182925 | 6.122592464 | <b>0.784566237</b> | 0.717409539  | -0.067156698 |
| 203068_at   | KLHL21       | 6.819065605 | 7.602012246 | 6.835744934 | 7.838899144 | <b>0.782946642</b> | 1.003154209  | 0.220207568  |
| 217168_s_at | HERPUD1      | 8.406506793 | 9.188355987 | 8.444705599 | 9.144714063 | <b>0.781849194</b> | 0.700008464  | -0.08184073  |
| 202497_x_at | SLC2A3       | 6.016862433 | 6.796523249 | 6.015532712 | 6.710530548 | <b>0.779660815</b> | 0.694997836  | -0.08466298  |
| 212665_at   | TIPARP       | 8.640932028 | 9.41954181  | 9.536352402 | 10.01998109 | <b>0.778609782</b> | 0.483628686  | -0.294981096 |
| 213327_s_at | USP12        | 6.993955981 | 7.768790567 | 7.201715846 | 7.876679714 | <b>0.774834586</b> | 0.674963869  | -0.099870718 |
| 202464_s_at | PFKFB3       | 6.365306636 | 7.138857525 | 6.458157999 | 6.979005783 | <b>0.773550889</b> | 0.520847784  | -0.252703105 |
| 206636_at   | RASA2        | 5.448784203 | 6.218749152 | 5.291848459 | 5.622694611 | <b>0.769964949</b> | 0.330846152  | -0.439118797 |
| 203100_s_at | CDYL         | 6.325856185 | 7.095665242 | 6.19065454  | 7.089897207 | <b>0.769809057</b> | 0.899242667  | 0.12943361   |
| 203752_s_at | JUND         | 9.61610087  | 10.3853088  | 9.339320478 | 10.04248382 | <b>0.769207926</b> | 0.703163342  | -0.066044584 |
| 209447_at   | SYNE1        | 7.637977086 | 8.406180322 | 7.972960848 | 8.584847611 | <b>0.768203236</b> | 0.611886763  | -0.156316473 |
| 203343_at   | UGDH         | 7.55499714  | 8.322536991 | 7.342977984 | 7.879174074 | <b>0.767539851</b> | 0.53619609   | -0.231343761 |
| 212272_at   | LPIN1        | 5.640009349 | 6.407050398 | 5.569394218 | 6.361607772 | <b>0.767041049</b> | 0.792213554  | 0.025172505  |
| 203098_at   | CDYL         | 7.114032906 | 7.880608314 | 7.104097766 | 8.032768989 | <b>0.766575408</b> | 0.928671223  | 0.162095816  |
| 212810_s_at | SLC1A4       | 5.485159075 | 6.250595941 | 5.873811249 | 6.506091473 | <b>0.765436866</b> | 0.632280225  | -0.133156641 |
| 205525_at   | CALD1        | 5.999355491 | 6.763387512 | 5.761715991 | 6.80266503  | <b>0.764032021</b> | 1.040949038  | 0.276917018  |
| 208916_at   | SLC1A5       | 6.029173844 | 6.793133953 | 6.330595624 | 6.808120171 | <b>0.763960109</b> | 0.477524546  | -0.286435562 |
| 207535_s_at | NFKB2        | 5.325886358 | 6.089380215 | 4.947109176 | 5.779720203 | <b>0.763493858</b> | 0.832611026  | 0.069117169  |
| 204346_s_at | RASSF1       | 6.380199573 | 7.142739299 | 6.490060893 | 6.817650958 | <b>0.762539726</b> | 0.327590065  | -0.434949661 |
| 213281_at   | LOC100288387 | 5.14668571  | 5.909132383 | 5.427424419 | 5.750214934 | <b>0.762446673</b> | 0.322790515  | -0.439656158 |
| 218871_x_at | CSGALNACT2   | 6.909711186 | 7.670315716 | 7.74361978  | 8.170136883 | <b>0.76060453</b>  | 0.426517103  | -0.334087426 |
| 208892_s_at | DUSP6        | 7.986254652 | 8.74262666  | 8.337615106 | 8.569289794 | <b>0.756372008</b> | 0.231674688  | -0.52469732  |
| 206474_at   | CDK17        | 6.848781566 | 7.604244405 | 6.844335826 | 7.435884101 | <b>0.75462839</b>  | 0.591548275  | -0.163914564 |
| 212724_at   | RND3         | 9.254153229 | 10.00828198 | 9.31454763  | 10.11426472 | <b>0.754128754</b> | 0.799717086  | 0.045588333  |
| 209948_at   | KCNMB1       | 3.676331853 | 4.429961724 | 3.764436354 | 3.758305486 | <b>0.753629871</b> | -0.006130868 | -0.759760739 |
| 206411_s_at | ABL2         | 4.956258965 | 5.709655436 | 5.018971977 | 5.599721662 | <b>0.753396471</b> | 0.580749685  | -0.172646786 |
| 209239_at   | NFKB1        | 7.799482735 | 8.552560136 | 7.639225437 | 8.442625297 | <b>0.753077401</b> | 0.80339986   | 0.050322459  |
| 214446_at   | ELL2         | 5.958060163 | 6.707939438 | 6.340254689 | 7.107179473 | <b>0.749879275</b> | 0.766924785  | 0.01704551   |
| 206034_at   | SERPINB8     | 7.393226591 | 8.141487725 | 7.529878934 | 8.085185046 | <b>0.748261135</b> | 0.555306113  | -0.192955022 |
| 221050_s_at | GTPBP2       | 7.008727928 | 7.754299692 | 7.189253114 | 7.745333095 | <b>0.745571764</b> | 0.556079981  | -0.189491783 |
| 201468_s_at | NQO1         | 10.63643257 | 11.38082662 | 10.07872851 | 10.80872452 | <b>0.744394053</b> | 0.72999601   | -0.014398043 |
| 212276_at   | LPIN1        | 6.871636187 | 7.614852946 | 6.933361153 | 7.50125367  | <b>0.743216759</b> | 0.567892517  | -0.175324242 |
| 219279_at   | DOCK10       | 4.076536756 | 4.818541929 | 4.626644484 | 5.23659419  | <b>0.742005174</b> | 0.609949706  | -0.132055468 |
| 58367_s_at  | ZNF419       | 5.329928857 | 6.0703621   | 5.591857298 | 6.129622598 | <b>0.740433243</b> | 0.5377653    | -0.202667943 |
| 221276_s_at | SYNC         | 5.013503141 | 5.753694508 | 4.854274444 | 5.304840979 | <b>0.740191367</b> | 0.450566536  | -0.289624832 |
| 212367_at   | FEM1B        | 6.711881521 | 7.451648226 | 6.473901539 | 7.372385989 | <b>0.739766705</b> | 0.89848445   | 0.158717744  |
| 209699_x_at | AKR1C2       | 3.95142814  | 4.691009596 | 3.771422527 | 4.013378375 | <b>0.739581456</b> | 0.241955847  | -0.497625609 |
| 202638_s_at | ICAM1        | 7.209096039 | 7.948533384 | 7.733464792 | 7.867722316 | <b>0.739437345</b> | 0.134257525  | -0.60517982  |
| 213324_at   | SRC          | 5.659005203 | 6.396592323 | 5.794955912 | 6.214850167 | <b>0.73758712</b>  | 0.419894255  | -0.317692865 |
| 213310_at   | EIF2C2       | 6.621975166 | 7.358540704 | 6.725939793 | 7.206533848 | <b>0.736565538</b> | 0.480594055  | -0.255971483 |

|             |          |             |             |             |             |                    |             |              |
|-------------|----------|-------------|-------------|-------------|-------------|--------------------|-------------|--------------|
| 38037_at    | HBEGF    | 6.719581785 | 7.455262496 | 6.610007002 | 7.767531054 | <b>0.735680712</b> | 1.157524053 | 0.421843341  |
| 207604_s_at | SLC4A7   | 7.224949195 | 7.960284887 | 7.916574643 | 8.764558731 | <b>0.735335693</b> | 0.847984088 | 0.112648396  |
| 221571_at   | TRAF3    | 7.276349677 | 8.010065971 | 7.656653415 | 8.177641667 | <b>0.733716293</b> | 0.520988252 | -0.212728041 |
| 215037_s_at | BCL2L1   | 6.120294876 | 6.853429827 | 6.098382203 | 6.806161753 | <b>0.733134951</b> | 0.70777955  | -0.025355401 |
| 218223_s_at | PLEKHO1  | 6.710777105 | 7.440389707 | 7.029186169 | 7.838739979 | <b>0.729612602</b> | 0.80955381  | 0.079941208  |
| 210942_s_at | ST3GAL6  | 7.120580034 | 7.849016922 | 6.714560262 | 7.656600195 | <b>0.728436888</b> | 0.942039933 | 0.213603045  |
| 214430_at   | GLA      | 7.998661246 | 8.723894014 | 8.4989402   | 9.014562849 | <b>0.725232768</b> | 0.515622649 | -0.209610118 |
| 216060_s_at | DAAM1    | 6.482254561 | 7.205911983 | 6.299726863 | 6.897731191 | <b>0.723657422</b> | 0.598004328 | -0.125653095 |
| 214965_at   | SPATA2L  | 5.618258734 | 6.340811955 | 5.5170365   | 6.231423874 | <b>0.722553222</b> | 0.714387375 | -0.008165847 |
| 209785_s_at | PLA2G4C  | 7.895434653 | 8.616141561 | 8.814954598 | 9.134101122 | <b>0.720706908</b> | 0.319146525 | -0.401560383 |
| 202499_s_at | SLC2A3   | 7.038288213 | 7.757684197 | 7.134200744 | 7.590065789 | <b>0.719395985</b> | 0.455865046 | -0.263530939 |
| 214508_x_at | CREM     | 7.195515868 | 7.914642327 | 7.378127015 | 8.024175258 | <b>0.719126458</b> | 0.646048243 | 0.073078215  |
| 207000_s_at | PPP3CC   | 6.434345547 | 7.153317612 | 6.705479882 | 7.161547902 | <b>0.718972065</b> | 0.45606802  | -0.262904045 |
| 206109_at   | FUT1     | 4.958886603 | 5.677214958 | 5.193218566 | 5.602731865 | <b>0.718328355</b> | 0.409513299 | -0.308815056 |
| 212791_at   | C1orf216 | 6.243618655 | 6.960980203 | 6.174200839 | 6.923068293 | <b>0.717361548</b> | 0.748867454 | 0.031505906  |
| 202820_at   | AHR      | 7.636723574 | 8.353928496 | 7.27082317  | 7.743030084 | <b>0.717204922</b> | 0.472206915 | -0.244998007 |
| 204151_x_at | AKR1C1   | 4.319586369 | 5.03676304  | 4.016470886 | 4.389928846 | <b>0.717176671</b> | 0.37345796  | -0.343718711 |
| 206374_at   | DUSP8    | 4.358646501 | 5.075008946 | 4.448341848 | 5.158742995 | <b>0.716362445</b> | 0.710401146 | -0.005961298 |
| 209653_at   | KPNA4    | 7.790517257 | 8.500759684 | 7.794351268 | 8.387753234 | <b>0.710242427</b> | 0.593401966 | -0.116840461 |
| 210479_s_at | RORA     | 5.578746565 | 6.287553522 | 5.930852526 | 6.64294011  | <b>0.708806957</b> | 0.712087584 | 0.003280627  |
| 201751_at   | JOSD1    | 8.513380071 | 9.220773449 | 8.569773449 | 9.261786458 | <b>0.707395222</b> | 0.692013009 | -0.015382213 |
| 203320_at   | SH2B3    | 8.352131258 | 9.057050301 | 8.557665542 | 9.030710984 | <b>0.704919043</b> | 0.473045443 | -0.2318736   |
| 221778_at   | JHDM1D   | 5.488027708 | 6.190907568 | 5.338971646 | 6.025958072 | <b>0.702879859</b> | 0.686986426 | -0.015893433 |
| 205409_at   | FOSL2    | 3.832327566 | 4.535129323 | 4.053392018 | 4.518522688 | <b>0.702801758</b> | 0.46513067  | -0.237671088 |
| 213262_at   | SACS     | 7.935747623 | 8.637989537 | 7.585031079 | 8.030450635 | <b>0.702241914</b> | 0.445419555 | -0.256822358 |
| 215707_s_at | PRNP     | 7.095185812 | 7.795641153 | 6.953217123 | 7.629368317 | <b>0.70045534</b>  | 0.676151194 | -0.024304147 |
| 219496_at   | ANKRD57  | 4.296040705 | 4.994692808 | 4.421223931 | 4.783311988 | <b>0.698652104</b> | 0.362088057 | -0.336564047 |
| 204507_s_at | PPP3R1   | 6.613071215 | 7.311252877 | 6.842576454 | 7.293471985 | <b>0.698181662</b> | 0.450895531 | -0.247286131 |
| 206748_s_at | SPAG9    | 5.740477479 | 6.437327997 | 5.743662288 | 6.256763969 | <b>0.696850518</b> | 0.513101681 | -0.183748837 |
| 201397_at   | PHGDH    | 3.508937532 | 4.205360446 | 3.713132289 | 4.180353563 | <b>0.696422914</b> | 0.467221274 | -0.229201641 |
| 213355_at   | ST3GAL6  | 7.066411818 | 7.761602704 | 6.739653746 | 7.473999814 | <b>0.695190887</b> | 0.734346068 | 0.039155181  |
| 218318_s_at | NLK      | 6.038414031 | 6.733299986 | 5.829583618 | 6.502909595 | <b>0.694885954</b> | 0.673325977 | -0.021559977 |
| 204222_s_at | GLIPR1   | 9.265372665 | 9.959961723 | 9.377445703 | 9.918348428 | <b>0.694589057</b> | 0.540902724 | -0.153686333 |
| 212923_s_at | C6orf145 | 8.007059067 | 8.70103769  | 8.081176837 | 8.716723242 | <b>0.693978624</b> | 0.635546405 | -0.058432218 |
| 203821_at   | HBEGF    | 7.789286779 | 8.480348652 | 7.676211015 | 8.791914071 | <b>0.691061873</b> | 1.115703056 | 0.424641183  |
| 219423_x_at | TNFRSF25 | 6.384184927 | 7.073802011 | 6.892317775 | 7.384590257 | <b>0.689617085</b> | 0.492272482 | -0.197344603 |
| 200798_x_at | MCL1     | 7.902857771 | 8.59079413  | 7.563860113 | 8.047014167 | <b>0.687936359</b> | 0.483154054 | -0.204782305 |
| 212111_at   | STX12    | 8.891995416 | 9.579869404 | 9.134728827 | 9.640057463 | <b>0.687873988</b> | 0.505328637 | -0.182545351 |
| 204642_at   | S1PR1    | 7.869507851 | 8.556983655 | 7.817032236 | 8.329023895 | <b>0.687475804</b> | 0.511991659 | -0.175484146 |
| 219474_at   | C3orf52  | 4.006820313 | 4.692957735 | 4.056346387 | 4.781293817 | <b>0.686137422</b> | 0.72494743  | 0.038810008  |
| 208707_at   | EIF5     | 4.733252203 | 5.418200826 | 4.6808635   | 5.271799891 | <b>0.684948623</b> | 0.590936392 | -0.094012231 |
| 219973_at   | AR5J     | 6.49462402  | 7.177761823 | 6.401662763 | 6.996684602 | <b>0.683137804</b> | 0.595021839 | -0.088115965 |
| 221823_at   | C5orf30  | 6.347993453 | 7.030008194 | 6.559874554 | 6.716375244 | <b>0.682014741</b> | 0.15650069  | -0.525514051 |
| 215198_s_at | CALD1    | 5.029099408 | 5.709111863 | 4.594509443 | 5.747810783 | <b>0.680012455</b> | 1.15330134  | 0.473288885  |
| 218478_s_at | ZCCHC8   | 7.028910061 | 7.708691939 | 6.799044646 | 7.532500305 | <b>0.679781878</b> | 0.73345566  | 0.053673782  |
| 208813_at   | GOT1     | 7.872004871 | 8.551526686 | 7.951037389 | 8.495690151 | <b>0.679521815</b> | 0.544652762 | -0.134869052 |
| 212441_at   | KIAA0232 | 7.792743237 | 8.469587525 | 7.61049261  | 8.384968995 | <b>0.676844288</b> | 0.774476385 | 0.097632097  |
| 216283_s_at | PVR      | 5.602473198 | 6.277765998 | 6.065200392 | 6.653882136 | <b>0.675292799</b> | 0.588681744 | -0.086611056 |
| 209610_s_at | SLC1A4   | 6.613788692 | 7.287687269 | 6.85393596  | 7.381178939 | <b>0.673898577</b> | 0.527242979 | -0.146655598 |
| 206649_s_at | TFE3     | 5.003465231 | 5.67670306  | 4.91544067  | 5.58923796  | <b>0.673237829</b> | 0.67379729  | 0.000559461  |

|             |                    |             |             |             |             |                    |             |              |
|-------------|--------------------|-------------|-------------|-------------|-------------|--------------------|-------------|--------------|
| 202763_at   | CASP3              | 7.490459414 | 8.163088556 | 7.555430662 | 8.031195579 | <b>0.672629142</b> | 0.475764917 | -0.196864225 |
| 214682_at   | LOC399491          | 4.011672475 | 4.684134545 | 4.221306885 | 5.209175301 | <b>0.67246207</b>  | 0.987868415 | 0.315406345  |
| 221904_at   | FAM131A            | 5.064376641 | 5.735914628 | 5.899610511 | 6.250082911 | <b>0.671537987</b> | 0.3504724   | -0.321065587 |
| 204958_at   | PLK3               | 5.038423339 | 5.709234713 | 5.205535991 | 5.751060693 | <b>0.670811373</b> | 0.545524702 | -0.125286671 |
| 213005_s_at | KANK1              | 7.22478099  | 7.89219837  | 7.904342972 | 8.525863359 | <b>0.66741738</b>  | 0.621520387 | -0.045896993 |
| 218442_at   | TTC4               | 6.141548438 | 6.808721954 | 6.146315309 | 6.638965785 | <b>0.667173516</b> | 0.492650476 | -0.17452304  |
| 201844_s_at | RYBP               | 7.173765336 | 7.840803902 | 7.18948571  | 7.8136748   | <b>0.667038566</b> | 0.62418909  | -0.042849477 |
| 219053_s_at | VPS37C             | 8.08077577  | 8.744958683 | 8.126272181 | 8.7263039   | <b>0.664182913</b> | 0.600031719 | -0.064151194 |
| 209373_at   | MALL               | 8.496484942 | 9.158880254 | 8.512908763 | 8.829645992 | <b>0.662395313</b> | 0.316737229 | -0.345658084 |
| 220471_s_at | MYCT1              | 7.390697002 | 8.048914432 | 7.490300702 | 8.08167992  | <b>0.658217429</b> | 0.591379218 | -0.066838211 |
| 201324_at   | EMP1               | 10.27336442 | 10.9307417  | 10.59325345 | 10.98295947 | <b>0.657377275</b> | 0.38970602  | -0.267671255 |
| 215199_at   | CALD1              | 4.515173059 | 5.170773941 | 4.049158914 | 5.014685043 | <b>0.655600882</b> | 0.965526129 | 0.309925247  |
| 209674_at   | CRY1               | 6.463390089 | 7.116728088 | 6.233429474 | 6.754372741 | <b>0.653337999</b> | 0.520943267 | -0.132394732 |
| 214577_at   | MAP1B              | 7.226425333 | 7.875939726 | 7.077073295 | 7.708022868 | <b>0.649514394</b> | 0.630949573 | -0.018564821 |
| 202208_s_at | ARL4C              | 3.84908899  | 4.498264637 | 4.244125474 | 4.756363157 | <b>0.649175647</b> | 0.512237683 | -0.136937964 |
| 201467_s_at | NQO1               | 8.573500504 | 9.221534935 | 8.048306229 | 8.751487381 | <b>0.648034431</b> | 0.703181151 | 0.05514672   |
| 210756_s_at | NOTCH2             | 5.425334481 | 6.073045502 | 6.056494054 | 6.392148939 | <b>0.647711102</b> | 0.335654885 | -0.312056135 |
| 209210_s_at | FERMT2             | 10.26036791 | 10.90745721 | 9.166184433 | 9.821253602 | <b>0.647089295</b> | 0.655069169 | 0.007979874  |
| 220027_s_at | RASIP1             | 7.742541041 | 8.386902921 | 7.805644332 | 8.149760169 | <b>0.644361879</b> | 0.344115837 | -0.300246043 |
| 212434_at   | GRPEL1             | 6.898231526 | 7.542016288 | 6.96070376  | 7.391970206 | <b>0.643784762</b> | 0.431266446 | -0.212518316 |
| 218486_at   | KLF11              | 4.797949719 | 5.440869165 | 4.584560623 | 5.12829517  | <b>0.642919446</b> | 0.543734547 | -0.099184899 |
| 221064_s_at | UNKL               | 5.492745404 | 6.135590076 | 5.346328121 | 5.868170422 | <b>0.642844672</b> | 0.521842301 | -0.121002371 |
| 205599_at   | TRAF1              | 3.435737712 | 4.078492655 | 3.217284725 | 3.299913935 | <b>0.642754943</b> | 0.08262921  | -0.560125733 |
| 201118_at   | PGD                | 10.07559716 | 10.71736995 | 10.16372389 | 10.57994005 | <b>0.641772791</b> | 0.416216157 | -0.225556634 |
| 214212_x_at | FERMT2             | 7.574515542 | 8.21627366  | 6.910878155 | 7.637062235 | <b>0.641758118</b> | 0.72618408  | 0.084425962  |
| 208891_at   | DUSP6              | 8.591371853 | 9.232636247 | 8.803048558 | 9.049283073 | <b>0.641264394</b> | 0.246234516 | -0.395029878 |
| 219492_at   | CHIC2              | 8.918770997 | 9.559762263 | 9.061283919 | 9.647124884 | <b>0.640991266</b> | 0.585840965 | -0.055150301 |
| 202401_s_at | SRF                | 6.971600518 | 7.611090163 | 7.033734373 | 7.586108661 | <b>0.639489645</b> | 0.552374287 | -0.087115358 |
| 203935_at   | ACVR1              | 8.182886369 | 8.821962394 | 8.098821308 | 8.614686384 | <b>0.639076025</b> | 0.515865076 | -0.123210949 |
| 212112_s_at | STX12              | 9.365915908 | 10.0044877  | 9.57553586  | 10.03827852 | <b>0.638571796</b> | 0.462742657 | -0.175829139 |
| 220030_at   | STYK1              | 5.957759357 | 6.596125463 | 5.81648427  | 6.086322242 | <b>0.638366106</b> | 0.269837972 | -0.368528133 |
| 212470_at   | SPAG9              | 7.496384922 | 8.134705668 | 7.437881691 | 8.207448696 | <b>0.638320746</b> | 0.769567004 | 0.131246258  |
| 202123_s_at | ABL1               | 8.441767613 | 9.079495854 | 9.136197459 | 9.424996343 | <b>0.637728241</b> | 0.288798884 | -0.348929357 |
| 216236_s_at | SLC2A14 /// SLC2A3 | 6.438334425 | 7.075213746 | 6.441952244 | 7.113041026 | <b>0.636879321</b> | 0.671088782 | 0.034209461  |
| 212816_s_at | CBS                | 6.076266059 | 6.713028453 | 5.930813767 | 6.455083561 | <b>0.636762393</b> | 0.524269794 | -0.112492599 |
| 206085_s_at | CTH                | 3.410395165 | 4.047058248 | 3.240632876 | 3.727638125 | <b>0.636663084</b> | 0.487005248 | -0.149657835 |
| 204896_s_at | PTGER4             | 5.067830555 | 5.702646391 | 5.246550735 | 5.504295483 | <b>0.634815836</b> | 0.257744748 | -0.377071088 |
| 215120_s_at | SAMD4A             | 3.479876128 | 4.112740129 | 3.601364049 | 3.849604425 | <b>0.632864002</b> | 0.248240376 | -0.384623626 |
| 204094_s_at | TSC2D2             | 7.404292195 | 7.362765173 | 8.036984487 | 7.800472927 | <b>0.632692292</b> | 0.437707755 | -0.194984537 |
| 212666_at   | SMURF1             | 6.197140308 | 6.829155079 | 6.372055957 | 6.969069171 | <b>0.632014771</b> | 0.597013215 | -0.035001557 |
| 209061_at   | NCOA3              | 6.202082909 | 6.833506798 | 6.185346212 | 6.673286925 | <b>0.631423888</b> | 0.487940713 | -0.143483176 |
| 222088_s_at | SLC2A14 /// SLC2A3 | 6.077431202 | 6.708691855 | 6.221128733 | 6.601804175 | <b>0.631260654</b> | 0.380675442 | -0.250585212 |
| 204729_s_at | STX1A              | 4.305046257 | 4.934534966 | 4.464420692 | 5.217071789 | <b>0.629488709</b> | 0.752651097 | 0.123162388  |
| 202402_s_at | CARS               | 7.469519687 | 8.098862947 | 7.626595255 | 8.148321484 | <b>0.629343261</b> | 0.521726229 | -0.107617032 |
| 200779_at   | ATF4               | 10.90193683 | 11.53073065 | 10.76255834 | 11.52403013 | <b>0.628793823</b> | 0.76147179  | 0.132677967  |
| 215485_s_at | ICAM1              | 5.948630497 | 6.576678654 | 6.253043131 | 6.604667073 | <b>0.628048157</b> | 0.351623943 | -0.276424214 |
| 221944_at   | FLJ42627           | 4.512739078 | 5.140667739 | 4.473649173 | 5.171418665 | <b>0.627928661</b> | 0.697769492 | 0.069840831  |
| 221011_s_at | LBH                | 2.960052138 | 3.587857115 | 3.066625154 | 3.619617118 | <b>0.627804976</b> | 0.552991964 | -0.074813012 |
| 209020_at   | C20orf111          | 7.40502063  | 8.032373594 | 7.091066507 | 7.833636535 | <b>0.627352964</b> | 0.742570027 | 0.115217064  |
| 200796_s_at | MCL1               | 5.548503624 | 6.1749721   | 5.383402292 | 5.891107118 | <b>0.626468475</b> | 0.507704826 | -0.118763649 |



|             |           |             |             |             |             |                    |              |              |
|-------------|-----------|-------------|-------------|-------------|-------------|--------------------|--------------|--------------|
| 202260_s_at | STXBP1    | 6.907939319 | 7.534379673 | 7.141136646 | 7.451803244 | <b>0.626440353</b> | 0.310666598  | -0.315773755 |
| 212233_at   | MAP1B     | 10.33254088 | 10.95895522 | 10.20084702 | 10.75896291 | <b>0.626414338</b> | 0.55811589   | -0.068298448 |
| 201845_s_at | RYBP      | 6.483155058 | 7.109531273 | 6.671808862 | 7.287256169 | <b>0.626376215</b> | 0.615447308  | -0.010928907 |
| 202695_s_at | STK17A    | 5.077701476 | 5.703210504 | 4.984730446 | 5.251998735 | <b>0.625509028</b> | 0.267268289  | -0.358240739 |
| 212110_at   | SLC39A14  | 8.256081201 | 8.881473429 | 8.398881385 | 8.668670241 | <b>0.625392229</b> | 0.269788857  | -0.355603372 |
| 215977_x_at | GK        | 3.637136562 | 4.262167449 | 3.801125478 | 3.845053091 | <b>0.625030887</b> | 0.043927613  | -0.581103274 |
| 216607_s_at | CYP51A1   | 7.193450668 | 7.81781484  | 6.443368064 | 7.265131636 | <b>0.624364172</b> | 0.821763572  | 0.1973994    |
| 219326_s_at | B3GNT2    | 6.361114866 | 6.98500906  | 6.470749169 | 6.878171568 | <b>0.623894193</b> | 0.407422399  | -0.216471794 |
| 204506_at   | PPP3R1    | 6.880640969 | 7.503735508 | 7.209084483 | 7.550209084 | <b>0.623094539</b> | 0.341124601  | -0.281969939 |
| 211352_s_at | NCOA3     | 6.333239657 | 6.956141885 | 6.191620139 | 6.986173842 | <b>0.622902228</b> | 0.794553702  | 0.171651474  |
| 219569_s_at | TMEM22    | 7.783715874 | 8.405749599 | 7.853082422 | 8.427868437 | <b>0.622033725</b> | 0.574786016  | -0.04724771  |
| 219558_at   | ATP13A3   | 7.785431588 | 8.407101834 | 7.670605797 | 8.055469537 | <b>0.621670246</b> | 0.38486374   | -0.236806506 |
| 202071_at   | SDC4      | 6.218060661 | 6.838611703 | 6.055107684 | 6.205449259 | <b>0.620551042</b> | 0.150341575  | -0.470209467 |
| 213567_at   | ---       | 6.948098412 | 7.568454746 | 6.700096084 | 7.167360705 | <b>0.620356334</b> | 0.467264621  | -0.153091713 |
| 218368_s_at | TNFRSF12A | 7.30572816  | 7.925906187 | 7.335192864 | 8.059728507 | <b>0.620178027</b> | 0.724535643  | 0.104357616  |
| 213191_at   | TICAM1    | 5.705929579 | 6.325208028 | 5.799391423 | 6.3625997   | <b>0.619278449</b> | 0.563208277  | -0.056070172 |
| 213532_at   | ADAM17    | 8.886237153 | 9.505207719 | 9.048633606 | 9.517403506 | <b>0.618970566</b> | 0.4687699    | -0.150200665 |
| 219240_s_at | C10orf88  | 5.85524996  | 6.473667907 | 5.736307645 | 6.369430437 | <b>0.618417947</b> | 0.633122792  | 0.014704844  |
| 209967_s_at | CREM      | 6.995788999 | 7.612283125 | 6.993551801 | 7.523983343 | <b>0.616494126</b> | 0.530431542  | -0.086062584 |
| 204221_x_at | GLIPR1    | 7.471423793 | 8.08790077  | 7.700481417 | 8.191010361 | <b>0.616476977</b> | 0.490528944  | -0.125948034 |
| 219826_at   | ZNF419    | 5.862792039 | 6.478915815 | 5.825858165 | 6.412774679 | <b>0.616123776</b> | 0.586916514  | -0.029207262 |
| 215493_x_at | BTN2A1    | 6.730427567 | 7.346187708 | 7.169131484 | 7.760564339 | <b>0.615760141</b> | 0.591432855  | -0.024327285 |
| 212468_at   | SPAG9     | 5.671016704 | 6.28583957  | 5.775020456 | 6.336029577 | <b>0.614822866</b> | 0.561009121  | -0.053813745 |
| 212444_at   | ---       | 6.886924687 | 7.501705164 | 6.902859526 | 7.147114793 | <b>0.614780477</b> | 0.2442525267 | -0.37052521  |
| 202097_at   | NUP153    | 7.684681899 | 8.298768434 | 7.362408353 | 7.811729173 | <b>0.614086536</b> | 0.44932082   | -0.164765716 |
| 200808_s_at | ZYX       | 9.075496233 | 9.689088275 | 9.025306151 | 9.536394139 | <b>0.613592042</b> | 0.511087988  | -0.102504054 |
| 215886_x_at | USP12     | 3.864422913 | 4.47796801  | 3.973813077 | 4.298972035 | <b>0.613545097</b> | 0.325158958  | -0.288386139 |
| 202719_s_at | TES       | 8.013350863 | 8.625749988 | 8.077210819 | 8.58679257  | <b>0.612399125</b> | 0.509581751  | -0.102817374 |
| 213700_s_at | ---       | 4.931190442 | 5.543322026 | 5.078348348 | 5.804133708 | <b>0.612131583</b> | 0.725785359  | 0.113653776  |
| 218611_at   | IER5      | 7.855245395 | 8.466793365 | 7.70998588  | 8.189756906 | <b>0.611547969</b> | 0.479771026  | -0.131776943 |
| 206867_at   | GCKR      | 4.281105858 | 4.89231772  | 4.754836995 | 5.077291068 | <b>0.611211862</b> | 0.3224504073 | -0.288757788 |
| 200769_s_at | MAT2A     | 6.085679937 | 6.696519896 | 6.04945004  | 6.591514883 | <b>0.610839958</b> | 0.542064843  | -0.068775116 |
| 211841_s_at | TNFRSF25  | 4.639237864 | 5.249460619 | 4.893395067 | 5.475052517 | <b>0.610222755</b> | 0.581657449  | -0.028565306 |
| 201846_s_at | RYBP      | 6.747895794 | 7.357688677 | 7.076949069 | 7.742338114 | <b>0.609792883</b> | 0.665389045  | 0.055596162  |
| 200797_s_at | MCL1      | 9.327063101 | 9.935791017 | 9.233344962 | 9.730427922 | <b>0.608727916</b> | 0.49708296   | -0.111644956 |
| 201866_s_at | NR3C1     | 6.357040048 | 6.965551134 | 6.731065355 | 7.197351132 | <b>0.608511086</b> | 0.466285777  | -0.142225309 |
| 218566_s_at | CHORDC1   | 7.265235845 | 7.873360493 | 6.892978311 | 7.477497467 | <b>0.608124648</b> | 0.584519157  | -0.023605491 |
| 208775_at   | XPO1      | 9.113084524 | 9.720673163 | 9.03806016  | 9.646169449 | <b>0.607588639</b> | 0.608109289  | 0.00052065   |
| 213793_s_at | HOMER1    | 3.760843695 | 4.367536068 | 4.128453045 | 4.750656099 | <b>0.606692373</b> | 0.622203054  | 0.015510682  |
| 219092_s_at | IPPK      | 5.011048648 | 5.617560172 | 5.462964123 | 5.822191246 | <b>0.606511524</b> | 0.359227123  | -0.247284401 |
| 203192_at   | ABCB6     | 4.620555702 | 5.226521409 | 4.65565643  | 4.948680765 | <b>0.605965707</b> | 0.293024335  | -0.312941372 |
| 205282_at   | LRP8      | 4.468334264 | 5.07413501  | 4.271951763 | 4.574733103 | <b>0.605800746</b> | 0.302781341  | -0.303019406 |
| 210847_x_at | TNFRSF25  | 4.251346501 | 4.856300846 | 4.486153908 | 5.047016386 | <b>0.604954345</b> | 0.560862478  | -0.044091866 |
| 210426_x_at | RORA      | 6.278140125 | 6.883070944 | 6.500190788 | 7.311102429 | <b>0.604930819</b> | 0.810911641  | 0.205980822  |
| 202656_s_at | SERTAD2   | 6.670736817 | 7.275437515 | 6.855893449 | 7.408106403 | <b>0.604700698</b> | 0.552212954  | -0.052487744 |
| 201531_at   | ZFP36     | 6.640098575 | 7.244050055 | 6.44763924  | 7.368716725 | <b>0.603951481</b> | 0.921077485  | 0.317126005  |
| 212635_at   | TNPO1     | 9.331534616 | 9.935170375 | 9.224220259 | 9.555104025 | <b>0.603635759</b> | 0.330883766  | -0.272751993 |
| 220494_s_at | ---       | 5.138082465 | 5.739170106 | 5.570917732 | 5.666921306 | <b>0.601087641</b> | 0.096003574  | -0.505980468 |
| 201739_at   | SGK1      | 9.176473863 | 9.776544355 | 9.304519913 | 9.982204555 | <b>0.600070493</b> | 0.677684642  | 0.077614149  |
| 219778_at   | ZFPM2     | 7.061532389 | 7.661242128 | 6.607963161 | 6.880603482 | <b>0.599709739</b> | 0.272640322  | -0.327069417 |

|             |                   |             |             |             |             |                    |             |              |
|-------------|-------------------|-------------|-------------|-------------|-------------|--------------------|-------------|--------------|
| 215706_x_at | ZYX               | 9.467545944 | 10.06705304 | 9.538723533 | 10.00305967 | <b>0.599507095</b> | 0.464336141 | -0.135170954 |
| 209360_s_at | RUNX1             | 4.776919151 | 5.376277869 | 4.892371415 | 5.602519198 | <b>0.599358719</b> | 0.710147783 | 0.110789064  |
| 200790_at   | ODC1              | 10.2373813  | 10.83570272 | 10.15815644 | 10.71189763 | <b>0.59832142</b>  | 0.55374119  | -0.04458023  |
| 216959_x_at | NRCAM             | 6.811566385 | 7.408314014 | 7.485609859 | 7.596646084 | <b>0.596747629</b> | 0.111036225 | -0.485711404 |
| 215359_x_at | ZNF44             | 5.011192608 | 5.606423031 | 4.858486558 | 5.786721451 | <b>0.595230423</b> | 0.928234894 | 0.333004471  |
| 206868_at   | STARD8            | 4.592538574 | 5.1870528   | 4.740877874 | 4.796159673 | <b>0.594514226</b> | 0.055281799 | -0.539232427 |
| 209372_x_at | TUBB2A /// TUBB2B | 4.652590295 | 5.246420822 | 4.689632795 | 5.158119549 | <b>0.593830527</b> | 0.468486754 | -0.125343773 |
| 33304_at    | ISG20             | 6.100641476 | 6.694455855 | 7.515199708 | 7.83187973  | <b>0.593814379</b> | 0.316680022 | -0.277134357 |
| 209621_s_at | PDLIM3            | 5.871874113 | 6.465356306 | 5.960133827 | 6.332788092 | <b>0.593482193</b> | 0.372654265 | -0.220827928 |
| 215236_s_at | PICALM            | 7.911199471 | 8.504559945 | 7.736104119 | 8.304810459 | <b>0.593360474</b> | 0.56870634  | -0.024654134 |
| 214085_x_at | GLIPR1            | 10.12842882 | 10.72132139 | 10.3079325  | 10.818917   | <b>0.592892568</b> | 0.5109845   | -0.081908068 |
| 211282_x_at | TNFRSF25          | 5.486016475 | 6.07834737  | 6.053764125 | 6.492305873 | <b>0.592330895</b> | 0.438541748 | -0.153789147 |
| 212971_at   | CARS              | 9.844673912 | 10.43695823 | 10.11796639 | 10.55613859 | <b>0.592284313</b> | 0.438172203 | -0.15411211  |
| 209446_s_at | C7orf44           | 3.144690787 | 3.736358847 | 3.208366474 | 3.925155006 | <b>0.59166806</b>  | 0.716788532 | 0.125120472  |
| 32541_at    | PPP3CC            | 5.533886146 | 6.125546907 | 5.569900157 | 6.03794515  | <b>0.591660761</b> | 0.468044993 | -0.123615768 |
| 209212_s_at | KLF5              | 3.444572785 | 4.036156304 | 3.715590851 | 4.218726368 | <b>0.59158352</b>  | 0.503135517 | -0.088448003 |
| 202021_x_at | EIF1              | 10.97847451 | 11.56962275 | 11.21178115 | 11.68211152 | <b>0.59114824</b>  | 0.47033037  | -0.12081787  |
| 211564_s_at | PDLIM4            | 8.171851298 | 8.762111328 | 8.772876254 | 9.010127435 | <b>0.59026003</b>  | 0.237251181 | -0.353008849 |
| 212190_at   | SERPINE2          | 7.152193864 | 7.740437803 | 7.983240229 | 8.219975081 | <b>0.588243939</b> | 0.236734852 | -0.351509087 |
| 202460_s_at | LPIN2             | 4.735510346 | 5.322583622 | 4.891006732 | 5.434034355 | <b>0.587073276</b> | 0.543027624 | -0.044045653 |
| 203099_s_at | CDYL              | 6.5634118   | 7.150220664 | 6.511125285 | 7.286567455 | <b>0.586808864</b> | 0.77544217  | 0.188633306  |
| 209062_x_at | NCOA3             | 6.220242688 | 6.805752958 | 6.207675494 | 6.96720807  | <b>0.58551027</b>  | 0.759532576 | 0.174022306  |

**Supplementary Table 4. Categories of genes induced by OxPAPC by 1.5 fold in HAECs.**  
**DAVID analysis was used for the identification of gene categories.**  
<http://david.abcc.ncifcrf.gov/home.jsp>

| Category        | Term                                                                        | Count | %           | PValue   | Genes                | List Total | Pop Hits | Pop Total | Fold Enrichment | Bonferroni | Benjamini | FDR      |
|-----------------|-----------------------------------------------------------------------------|-------|-------------|----------|----------------------|------------|----------|-----------|-----------------|------------|-----------|----------|
| SP_PIR_KEYWORDS | phosphoprotein                                                              | 238   |             | 56       | 1.20E-15 201464_X_A' | 418        | 7263     | 19235     | 1.507914862     | 4.92E-13   | 4.92E-13  | 1.71E-12 |
| UP_SEQ_FEATURE  | domain:Leucine-zipper                                                       | 22    | 5.176470588 | 2.50E-14 | 201464_X_A'          | 418        | 110      | 19113     | 9.144976077     | 3.35E-11   | 3.35E-11  | 4.09E-11 |
| GOTERM_BP_FAT   | GO:0042981~regulation of apoptosis                                          | 61    | 14.35294118 | 5.76E-14 | 201464_X_A'          | 350        | 804      | 13528     | 2.932508884     | 1.35E-10   | 1.35E-10  | 1.01E-10 |
| INTERPRO        | IPR004827:Basic-leucine zipper (bZIP) transcription factor                  | 17    | 4           | 5.98E-14 | 201464_X_A'          | 401        | 53       | 16659     | 13.32531878     | 4.52E-11   | 4.52E-11  | 9.12E-11 |
| GOTERM_BP_FAT   | GO:0043067~regulation of programmed cell death                              | 61    | 14.35294118 | 8.89E-14 | 201464_X_A'          | 350        | 812      | 13528     | 2.903617171     | 2.08E-10   | 1.04E-10  | 1.56E-10 |
| GOTERM_BP_FAT   | GO:0010941~regulation of cell death                                         | 61    | 14.35294118 | 1.05E-13 | 201464_X_A'          | 350        | 815      | 13528     | 2.892929001     | 2.46E-10   | 8.18E-11  | 1.84E-10 |
| SMART           | SM00338:BRLZ                                                                | 17    | 4           | 3.15E-13 | 201464_X_A'          | 247        | 53       | 9079      | 11.79000084     | 5.39E-11   | 5.39E-11  | 3.85E-10 |
| UP_SEQ_FEATURE  | DNA-binding region:Basic motif                                              | 24    | 5.647058824 | 9.11E-13 | 201464_X_A'          | 418        | 161      | 19113     | 6.816131237     | 1.22E-09   | 6.12E-10  | 1.49E-09 |
| SP_PIR_KEYWORDS | cytoplasm                                                                   | 129   | 30.35294118 | 9.68E-12 | 209636_AT, ;         | 418        | 3332     | 19235     | 1.78156071      | 3.90E-09   | 1.95E-09  | 1.35E-08 |
| GOTERM_BP_FAT   | GO:0043066~negative regulation of apoptosis                                 | 35    | 8.235294118 | 3.65E-11 | 208230_S_A'          | 350        | 354      | 13528     | 3.821468927     | 8.54E-08   | 2.13E-08  | 6.39E-08 |
| GOTERM_BP_FAT   | GO:0043069~negative regulation of programmed cell death                     | 35    | 8.235294118 | 5.35E-11 | 208230_S_A'          | 350        | 359      | 13528     | 3.768245125     | 1.25E-07   | 2.50E-08  | 9.37E-08 |
| GOTERM_BP_FAT   | GO:0060548~negative regulation of cell death                                | 35    | 8.235294118 | 5.74E-11 | 208230_S_A'          | 350        | 360      | 13528     | 3.757777778     | 1.34E-07   | 2.24E-08  | 1.00E-07 |
| SP_PIR_KEYWORDS | Apoptosis                                                                   | 32    | 7.529411765 | 3.01E-10 | 218000_S_A'          | 418        | 381      | 19235     | 3.864923583     | 1.21E-07   | 4.04E-08  | 4.20E-07 |
| GOTERM_BP_FAT   | GO:0008219~cell death                                                       | 50    | 11.76470588 | 3.83E-10 | 201464_X_A'          | 350        | 719      | 13528     | 2.687860123     | 8.96E-07   | 1.28E-07  | 6.71E-07 |
| GOTERM_BP_FAT   | GO:0016265~death                                                            | 50    | 11.76470588 | 4.82E-10 | 201464_X_A'          | 350        | 724      | 13528     | 2.669297553     | 1.13E-06   | 1.41E-07  | 8.44E-07 |
| GOTERM_BP_FAT   | GO:0012501~programmed cell death                                            | 45    | 10.58823529 | 6.05E-10 | 201464_X_A'          | 350        | 611      | 13528     | 2.846668225     | 1.42E-06   | 1.57E-07  | 1.06E-06 |
| GOTERM_BP_FAT   | GO:0006916~anti-apoptosis                                                   | 25    | 5.882352941 | 6.58E-10 | 212171_X_A'          | 350        | 206      | 13528     | 4.690707351     | 1.54E-06   | 1.54E-07  | 1.15E-06 |
| GOTERM_BP_FAT   | GO:0031328~positive regulation of cellular biosynthetic process             | 48    | 11.29411765 | 7.37E-10 | 201464_X_A'          | 350        | 685      | 13528     | 2.708421272     | 1.73E-06   | 1.57E-07  | 1.29E-06 |
| GOTERM_BP_FAT   | GO:0009891~positive regulation of biosynthetic process                      | 48    | 11.29411765 | 1.18E-09 | 201464_X_A'          | 350        | 695      | 13528     | 2.669451182     | 2.77E-06   | 2.31E-07  | 2.07E-06 |
| GOTERM_BP_FAT   | GO:0006915~apoptosis                                                        | 44    | 10.35294118 | 1.24E-09 | 201464_X_A'          | 350        | 602      | 13528     | 2.825021357     | 2.91E-06   | 2.24E-07  | 2.18E-06 |
| GOTERM_BP_FAT   | GO:0051173~positive regulation of nitrogen compound metabolic process       | 45    | 10.58823529 | 3.11E-09 | 201464_X_A'          | 350        | 644      | 13528     | 2.70079858      | 7.29E-06   | 5.20E-07  | 5.45E-06 |
| GOTERM_BP_FAT   | GO:0010033~response to organic substance                                    | 48    | 11.29411765 | 3.83E-09 | 201464_X_A'          | 350        | 721      | 13528     | 2.573188032     | 8.96E-06   | 5.97E-07  | 6.70E-06 |
| GOTERM_BP_FAT   | GO:0010557~positive regulation of macromolecule biosynthetic process        | 45    | 10.58823529 | 4.98E-09 | 201464_X_A'          | 350        | 654      | 13528     | 2.659501966     | 1.17E-05   | 7.29E-07  | 8.72E-06 |
| GOTERM_MF_FAT   | GO:0046983~protein dimerization activity                                    | 39    | 9.176470588 | 2.14E-08 | 201464_X_A'          | 337        | 542      | 12983     | 2.77211011      | 1.39E-05   | 1.39E-05  | 3.19E-05 |
| SP_PIR_KEYWORDS | activator                                                                   | 34    | 8           | 3.98E-08 | 209636_AT, ;         | 418        | 520      | 19235     | 3.008787265     | 1.60E-05   | 4.01E-06  | 5.56E-05 |
| GOTERM_BP_FAT   | GO:0043065~positive regulation of apoptosis                                 | 33    | 7.764705882 | 7.39E-08 | 201464_X_A'          | 350        | 430      | 13528     | 2.966272425     | 1.73E-04   | 1.02E-05  | 1.29E-04 |
| GOTERM_BP_FAT   | GO:0043068~positive regulation of programmed cell death                     | 33    | 7.764705882 | 8.64E-08 | 201464_X_A'          | 350        | 433      | 13528     | 2.945720884     | 2.02E-04   | 1.12E-05  | 1.51E-04 |
| GOTERM_BP_FAT   | GO:0010942~positive regulation of cell death                                | 33    | 7.764705882 | 9.65E-08 | 201464_X_A'          | 350        | 435      | 13528     | 2.93217734      | 2.26E-04   | 1.19E-05  | 1.69E-04 |
| GOTERM_BP_FAT   | GO:0045935~positive regulation of nucleobase, nucleoside, nucleotide and nu | 41    | 9.647058824 | 9.83E-08 | 201464_X_A'          | 350        | 624      | 13528     | 2.53959707      | 2.30E-04   | 1.15E-05  | 1.72E-04 |
| GOTERM_BP_FAT   | GO:0051094~positive regulation of developmental process                     | 25    | 5.882352941 | 2.34E-07 | 201464_X_A'          | 350        | 278      | 13528     | 3.475847893     | 5.47E-04   | 2.61E-05  | 4.10E-04 |
| GOTERM_CC_FAT   | GO:0005829~cytosol                                                          | 60    | 14.11764706 | 2.65E-07 | 209636_AT, ;         | 290        | 1330     | 12782     | 1.988384755     | 7.29E-05   | 7.29E-05  | 3.50E-04 |
| GOTERM_MF_FAT   | GO:0008134~transcription factor binding                                     | 35    | 8.235294118 | 4.64E-07 | 209636_AT, ;         | 337        | 513      | 12983     | 2.62842649      | 3.02E-04   | 1.51E-04  | 6.93E-04 |
| GOTERM_BP_FAT   | GO:0045941~positive regulation of transcription                             | 37    | 8.705882353 | 4.98E-07 | 201464_X_A'          | 350        | 564      | 13528     | 2.535643364     | 0.00116367 | 5.29E-05  | 8.71E-04 |
| INTERPRO        | IPR011616:bZIP transcription factor, bZIP-1                                 | 9     | 2.117647059 | 5.01E-07 | 204194_AT, ;         | 401        | 31       | 16659     | 12.06105703     | 3.78E-04   | 1.89E-04  | 7.63E-04 |
| GOTERM_BP_FAT   | GO:0010604~positive regulation of macromolecule metabolic process           | 48    | 11.29411765 | 7.15E-07 | 201464_X_A'          | 350        | 857      | 13528     | 2.164840807     | 0.0016723  | 7.28E-05  | 0.001252 |
| GOTERM_BP_FAT   | GO:0045893~positive regulation of transcription, DNA-dependent              | 33    | 7.764705882 | 7.70E-07 | 201464_X_A'          | 350        | 477      | 13528     | 2.673998203     | 0.00179991 | 7.51E-05  | 0.001348 |
| GOTERM_BP_FAT   | GO:0051254~positive regulation of RNA metabolic process                     | 33    | 7.764705882 | 9.24E-07 | 201464_X_A'          | 350        | 481      | 13528     | 2.651761212     | 0.00216035 | 8.65E-05  | 0.001618 |
| GOTERM_MF_FAT   | GO:0003700~transcription factor activity                                    | 52    | 12.23529412 | 9.90E-07 | 209636_AT, ;         | 337        | 975      | 12983     | 2.054678536     | 6.44E-04   | 2.15E-04  | 0.001479 |
| GOTERM_BP_FAT   | GO:0042127~regulation of cell proliferation                                 | 45    | 10.58823529 | 1.01E-06 | 201464_X_A'          | 350        | 787      | 13528     | 2.210056272     | 0.00235069 | 9.05E-05  | 0.001761 |
| GOTERM_BP_FAT   | GO:0010628~positive regulation of gene expression                           | 37    | 8.705882353 | 1.01E-06 | 201464_X_A'          | 350        | 581      | 13528     | 2.461450701     | 0.00235897 | 8.75E-05  | 0.001767 |
| KEGG_PATHWAY    | hsa04010:MAPK signaling pathway                                             | 26    | 6.117647059 | 1.02E-06 | 201464_X_A'          | 165        | 267      | 5085      | 3.00102145      | 1.37E-04   | 1.37E-04  | 0.001194 |
| GOTERM_MF_FAT   | GO:0003714~transcription corepressor activity                               | 17    | 4           | 1.06E-06 | 201845_S_A'          | 337        | 145      | 12983     | 4.51675023      | 6.93E-04   | 1.73E-04  | 0.00159  |
| UP_SEQ_FEATURE  | mutagenesis site                                                            | 78    | 18.35294118 | 1.19E-06 | 209636_AT, ;         | 418        | 2045     | 19113     | 1.744029667     | 0.0016006  | 5.34E-04  | 0.001955 |
| GOTERM_BP_FAT   | GO:0040017~positive regulation of locomotion                                | 14    | 3.294117647 | 1.33E-06 | 212470_AT, ;         | 350        | 98       | 13528     | 5.521632653     | 0.00311822 | 1.12E-04  | 0.002337 |
| GOTERM_BP_FAT   | GO:0001775~cell activation                                                  | 24    | 5.647058824 | 1.54E-06 | 209636_AT, ;         | 350        | 287      | 13528     | 3.232175212     | 0.00359264 | 1.24E-04  | 0.002693 |
| GOTERM_BP_FAT   | GO:0006357~regulation of transcription from RNA polymerase II promoter      | 42    | 9.882352941 | 1.95E-06 | 201464_X_A'          | 350        | 727      | 13528     | 2.232957359     | 0.00454882 | 1.52E-04  | 0.003411 |
| GOTERM_BP_FAT   | GO:0045597~positive regulation of cell differentiation                      | 21    | 4.941176471 | 2.02E-06 | 201464_X_A'          | 350        | 229      | 13528     | 3.544454148     | 0.00471294 | 1.52E-04  | 0.003535 |
| GOTERM_BP_FAT   | GO:0030335~positive regulation of cell migration                            | 13    | 3.058823529 | 2.87E-06 | 205745_X_A'          | 350        | 89       | 13528     | 5.645714286     | 0.00668703 | 2.10E-04  | 0.00502  |
| GOTERM_MF_FAT   | GO:0030528~transcription regulator activity                                 | 69    | 16.23529412 | 3.08E-06 | 201464_X_A'          | 337        | 1512     | 12983     | 1.758095474     | 0.00200456 | 4.01E-04  | 0.004603 |
| GOTERM_BP_FAT   | GO:0008284~positive regulation of cell proliferation                        | 29    | 6.823529412 | 3.28E-06 | 201464_X_A'          | 350        | 414      | 13528     | 2.707467219     | 0.0076541  | 2.33E-04  | 0.005749 |

|                 |                                                                                 |     |             |          |             |     |      |       |             |             |            |          |
|-----------------|---------------------------------------------------------------------------------|-----|-------------|----------|-------------|-----|------|-------|-------------|-------------|------------|----------|
| GOTERM_BP_FAT   | GO:0051789~response to protein stimulus                                         | 14  | 3.294117647 | 3.65E-06 | 214577_AT,: | 350 | 107  | 13528 | 5.057196262 | 0.00850652  | 2.51E-04   | 0.006392 |
| GOTERM_BP_FAT   | GO:0001568~blood vessel development                                             | 21  | 4.941176471 | 5.67E-06 | 201464_X_A' | 350 | 245  | 13528 | 3.312979592 | 0.01317632  | 3.79E-04   | 0.009924 |
| GOTERM_BP_FAT   | GO:0010035~response to inorganic substance                                      | 19  | 4.470588235 | 6.11E-06 | 201464_X_A' | 350 | 205  | 13528 | 3.582327526 | 0.01418664  | 3.97E-04   | 0.01069  |
| GOTERM_BP_FAT   | GO:0030334~regulation of cell migration                                         | 17  | 4           | 7.74E-06 | 212470_AT,: | 350 | 169  | 13528 | 3.888013525 | 0.01794522  | 4.89E-04   | 0.013548 |
| GOTERM_BP_FAT   | GO:0051272~positive regulation of cell motion                                   | 13  | 3.058823529 | 7.97E-06 | 205745_X_A' | 350 | 98   | 13528 | 5.127230321 | 0.01847606  | 4.91E-04   | 0.013952 |
| GOTERM_BP_FAT   | GO:0001944~vasculature development                                              | 21  | 4.941176471 | 8.15E-06 | 201464_X_A' | 350 | 251  | 13528 | 3.233784861 | 0.01889823  | 4.89E-04   | 0.014274 |
| GOTERM_BP_FAT   | GO:0019220~regulation of phosphate metabolic process                            | 31  | 7.294117647 | 8.72E-06 | 201464_X_A' | 350 | 485  | 13528 | 2.470503682 | 0.02018972  | 5.10E-04   | 0.01526  |
| GOTERM_BP_FAT   | GO:0051174~regulation of phosphorus metabolic process                           | 31  | 7.294117647 | 8.72E-06 | 201464_X_A' | 350 | 485  | 13528 | 2.470503682 | 0.02018972  | 5.10E-04   | 0.01526  |
| GOTERM_BP_FAT   | GO:0040012~regulation of locomotion                                             | 18  | 4.235294118 | 9.90E-06 | 212470_AT,: | 350 | 192  | 13528 | 3.623571429 | 0.02290057  | 5.65E-04   | 0.017332 |
| GOTERM_BP_FAT   | GO:0042325~regulation of phosphorylation                                        | 30  | 7.058823529 | 1.10E-05 | 201464_X_A' | 350 | 466  | 13528 | 2.488289393 | 0.02551321  | 6.15E-04   | 0.019335 |
| GOTERM_BP_FAT   | GO:0045944~positive regulation of transcription from RNA polymerase II promoter | 26  | 6.117647059 | 1.18E-05 | 201464_X_A' | 350 | 371  | 13528 | 2.708725452 | 0.02723833  | 6.42E-04   | 0.020661 |
| SP_PIR_KEYWORDS | stress response                                                                 | 10  | 2.352941176 | 1.20E-05 | 201739_AT,: | 418 | 66   | 19235 | 6.972234305 | 0.00484047  | 9.70E-04   | 0.016811 |
| SP_PIR_KEYWORDS | kinase                                                                          | 34  | 8           | 1.89E-05 | 212470_AT,: | 418 | 688  | 19235 | 2.274083398 | 0.00758494  | 0.00126817 | 0.026377 |
| INTERPRO        | IPR011700:Basic leucine zipper                                                  | 6   | 1.411764706 | 1.92E-05 | 209383_AT,: | 401 | 15   | 16659 | 16.61745636 | 0.01436473  | 0.00481136 | 0.029189 |
| GOTERM_BP_FAT   | GO:0048660~regulation of smooth muscle cell proliferation                       | 9   | 2.117647059 | 2.01E-05 | 201464_X_A' | 350 | 46   | 13528 | 7.562236025 | 0.0458742   | 0.0010667  | 0.03513  |
| GOTERM_BP_FAT   | GO:0003712~transcription cofactor activity                                      | 25  | 5.882352941 | 2.54E-05 | 209636_AT,: | 337 | 363  | 12983 | 2.653252242 | 0.01640366  | 0.00275282 | 0.037935 |
| GOTERM_BP_FAT   | GO:0006917~induction of apoptosis                                               | 23  | 5.411764706 | 2.96E-05 | 218000_S_A' | 350 | 320  | 13528 | 2.778071429 | 0.06702453  | 0.00154051 | 0.051895 |
| GOTERM_BP_FAT   | GO:0012502~induction of programmed cell death                                   | 23  | 5.411764706 | 3.08E-05 | 218000_S_A' | 350 | 321  | 13528 | 2.769417    | 0.06954089  | 0.00156567 | 0.053915 |
| GOTERM_BP_FAT   | GO:0002520~immune system development                                            | 21  | 4.941176471 | 3.25E-05 | 209636_AT,: | 350 | 276  | 13528 | 2.940869565 | 0.07315866  | 0.00161514 | 0.056828 |
| GOTERM_BP_FAT   | GO:0051270~regulation of cell motion                                            | 17  | 4           | 4.07E-05 | 212470_AT,: | 350 | 193  | 13528 | 3.404529978 | 0.09077535  | 0.0019806  | 0.071177 |
| GOTERM_BP_FAT   | GO:0030097~hemopoiesis                                                          | 19  | 4.470588235 | 4.14E-05 | 212171_X_A' | 350 | 236  | 13528 | 3.111767554 | 0.09222923  | 0.00197281 | 0.072374 |
| GOTERM_BP_FAT   | GO:0051098~regulation of binding                                                | 15  | 3.529411765 | 4.18E-05 | 209061_AT,: | 350 | 153  | 13528 | 3.789355742 | 0.09326309  | 0.00195614 | 0.073226 |
| SP_PIR_KEYWORDS | Proto-oncogene                                                                  | 17  | 4           | 4.48E-05 | 201464_X_A' | 418 | 230  | 19235 | 3.401237778 | 0.01789121  | 0.0025757  | 0.062531 |
| GOTERM_BP_FAT   | GO:0048534~hemopoietic or lymphoid organ development                            | 20  | 4.705882353 | 4.62E-05 | 209636_AT,: | 350 | 260  | 13528 | 2.973186813 | 0.10241555  | 0.00211635 | 0.080811 |
| SP_PIR_KEYWORDS | nucleus                                                                         | 128 | 30.11764706 | 5.43E-05 | 201464_X_A' | 418 | 4283 | 19235 | 1.37523781  | 0.021633475 | 0.00273029 | 0.075755 |
| SP_PIR_KEYWORDS | DNA binding                                                                     | 21  | 4.941176471 | 5.77E-05 | 201464_X_A' | 418 | 340  | 19235 | 2.842210808 | 0.02300415  | 0.00258253 | 0.080604 |
| GOTERM_BP_FAT   | GO:0051090~regulation of transcription factor activity                          | 12  | 2.823529412 | 6.89E-05 | 203665_AT,: | 350 | 103  | 13528 | 4.503079057 | 0.14894454  | 0.00309669 | 0.120599 |
| GOTERM_BP_FAT   | GO:0030098~lymphocyte differentiation                                           | 12  | 2.823529412 | 6.89E-05 | 205745_X_A' | 350 | 103  | 13528 | 4.503079057 | 0.14894454  | 0.00309669 | 0.120599 |
| GOTERM_MF_FAT   | GO:0016564~transcription repressor activity                                     | 22  | 5.176470588 | 7.61E-05 | 213138_AT,: | 337 | 316  | 12983 | 2.682135747 | 0.04833294  | 0.00705216 | 0.113581 |
| GOTERM_BP_FAT   | GO:0006979~response to oxidative stress                                         | 15  | 3.529411765 | 8.94E-05 | 201464_X_A' | 350 | 164  | 13528 | 3.535191638 | 0.18874788  | 0.00393895 | 0.156387 |
| GOTERM_BP_FAT   | GO:0045859~regulation of protein kinase activity                                | 23  | 5.411764706 | 9.16E-05 | 204011_AT,: | 350 | 345  | 13528 | 2.576761905 | 0.19291268  | 0.00396109 | 0.160232 |
| GOTERM_BP_FAT   | GO:0048008~platelet-derived growth factor receptor signaling pathway            | 6   | 1.411764706 | 9.58E-05 | 212171_X_A' | 350 | 19   | 13528 | 12.20571429 | 0.20088559  | 0.00406899 | 0.167648 |
| SP_PIR_KEYWORDS | transcription regulation                                                        | 70  | 16.47058824 | 9.68E-05 | 201464_X_A' | 418 | 2026 | 19235 | 1.589917201 | 0.03826606  | 0.00389414 | 0.155097 |
| GOTERM_BP_FAT   | GO:0051252~regulation of RNA metabolic process                                  | 73  | 17.17647059 | 9.96E-05 | 201464_X_A' | 350 | 1813 | 13528 | 1.556290284 | 0.20785771  | 0.00415232 | 0.174194 |
| KEGG_PATHWAY    | hsa05200:Pathways in cancer                                                     | 25  | 5.882352941 | 1.11E-04 | 201464_X_A' | 165 | 328  | 5085  | 2.348946785 | 0.01491798  | 0.00748702 | 0.130442 |
| GOTERM_BP_FAT   | GO:0048514~blood vessel morphogenesis                                           | 17  | 4           | 1.18E-04 | 201464_X_A' | 350 | 211  | 13528 | 3.114096141 | 0.24074881  | 0.00482032 | 0.205864 |
| GOTERM_BP_FAT   | GO:0001525~angiogenesis                                                         | 14  | 3.294117647 | 1.19E-04 | 201464_X_A' | 350 | 148  | 13528 | 3.656216216 | 0.24312659  | 0.00479123 | 0.208206 |
| GOTERM_BP_FAT   | GO:0048661~positive regulation of smooth muscle cell proliferation              | 7   | 1.647058824 | 1.20E-04 | 201464_X_A' | 350 | 31   | 13528 | 8.727741935 | 0.24564615  | 0.00476646 | 0.210696 |
| GOTERM_BP_FAT   | GO:0007242~intracellular signaling cascade                                      | 55  | 12.94117647 | 1.22E-04 | 212470_AT,: | 350 | 1256 | 13528 | 1.692538672 | 0.24853392  | 0.00475083 | 0.21356  |
| GOTERM_BP_FAT   | GO:0009719~response to endogenous stimulus                                      | 25  | 5.882352941 | 1.37E-04 | 214577_AT,: | 350 | 405  | 13528 | 2.385890653 | 0.27435725  | 0.00524354 | 0.239664 |
| SP_PIR_KEYWORDS | amino-acid biosynthesis                                                         | 6   | 1.411764706 | 1.41E-04 | 220346_AT,: | 418 | 24   | 19235 | 11.5041866  | 0.05539164  | 0.00516705 | 0.197248 |
| GOTERM_BP_FAT   | GO:0043549~regulation of kinase activity                                        | 23  | 5.411764706 | 1.49E-04 | 204011_AT,: | 350 | 357  | 13528 | 2.490148059 | 0.29479701  | 0.00561754 | 0.260989 |
| GOTERM_BP_FAT   | GO:0006355~regulation of transcription, DNA-dependent                           | 71  | 16.70588235 | 1.54E-04 | 201464_X_A' | 350 | 1773 | 13528 | 1.547801144 | 0.30277673  | 0.00570824 | 0.269481 |
| GOTERM_BP_FAT   | GO:0008283~cell proliferation                                                   | 26  | 6.117647059 | 1.66E-04 | 214211_AT,: | 350 | 436  | 13528 | 2.304901704 | 0.32269948  | 0.00606963 | 0.291112 |
| GOTERM_BP_FAT   | GO:0045321~leukocyte activation                                                 | 18  | 4.235294118 | 1.84E-04 | 209307_AT,: | 350 | 242  | 13528 | 2.874899646 | 0.34981568  | 0.00660118 | 0.32159  |
| SP_PIR_KEYWORDS | Transcription                                                                   | 70  | 16.47058824 | 1.88E-04 | 201464_X_A' | 418 | 2071 | 19235 | 1.555370473 | 0.07303394  | 0.00629993 | 0.262421 |
| GOTERM_BP_FAT   | GO:0034097~response to cytokine stimulus                                        | 10  | 2.352941176 | 1.92E-04 | 201464_X_A' | 350 | 79   | 13528 | 4.892585895 | 0.36130524  | 0.00676984 | 0.334886 |
| GOTERM_BP_FAT   | GO:0048520~positive regulation of behavior                                      | 7   | 1.647058824 | 2.06E-04 | 205745_X_A' | 350 | 34   | 13528 | 7.957647059 | 0.38271649  | 0.00717454 | 0.36031  |
| SP_PIR_KEYWORDS | repressor                                                                       | 23  | 5.411764706 | 2.22E-04 | 213138_AT,: | 418 | 435  | 19235 | 2.43306935  | 0.08572819  | 0.0068707  | 0.310061 |
| GOTERM_BP_FAT   | GO:0009309~amine biosynthetic process                                           | 10  | 2.352941176 | 2.32E-04 | 200790_AT,: | 350 | 81   | 13528 | 4.771781305 | 0.41913377  | 0.00795692 | 0.405634 |
| GOTERM_MF_FAT   | GO:0043565~sequence-specific DNA binding                                        | 32  | 7.529411765 | 2.42E-04 | 201464_X_A' | 337 | 607  | 12983 | 2.030983726 | 0.14566082  | 0.01948602 | 0.36049  |
| GOTERM_BP_FAT   | GO:0042592~homeostatic process                                                  | 37  | 8.705882353 | 2.52E-04 | 201464_X_A' | 350 | 751  | 13528 | 1.90426479  | 0.44515186  | 0.00850078 | 0.439777 |
| GOTERM_BP_FAT   | GO:0051338~regulation of transferase activity                                   | 23  | 5.411764706 | 2.69E-04 | 204011_AT,: | 350 | 372  | 13528 | 2.389738863 | 0.46773414  | 0.00896829 | 0.470725 |
| GOTERM_BP_FAT   | GO:0051101~regulation of DNA binding                                            | 12  | 2.823529412 | 2.92E-04 | 203665_AT,: | 350 | 121  | 13528 | 3.833199528 | 0.49533414  | 0.00958558 | 0.510369 |
| GOTERM_BP_FAT   | GO:0008652~cellular amino acid biosynthetic process                             | 8   | 1.882352941 | 3.12E-04 | 220346_AT,: | 350 | 51   | 13528 | 6.062969188 | 0.51838181  | 0.01009596 | 0.54516  |

|                 |                                                                     |     |             |           |             |     |      |       |             |            |            |            |
|-----------------|---------------------------------------------------------------------|-----|-------------|-----------|-------------|-----|------|-------|-------------|------------|------------|------------|
| KEGG_PATHWAY    | hsa05219:Bladder cancer                                             | 8   | 1.882352941 | 3.32E-04  | 212171_X_A` | 165 | 42   | 5085  | 5.87012987  | 0.04387944 | 0.01484579 | 0.388914   |
| GOTERM_BP_FAT   | GO:0010647~positive regulation of cell communication                | 21  | 4.941176471 | 3.54E-04  | 209061_AT,` | 350 | 329  | 13528 | 2.467112462 | 0.56365728 | 0.01129636 | 0.618597   |
| GOTERM_BP_FAT   | GO:0034637~cellular carbohydrate biosynthetic process               | 9   | 2.117647059 | 3.84E-04  | 218871_X_A` | 350 | 69   | 13528 | 5.041490683 | 0.59312028 | 0.01207832 | 0.670569   |
| UP_SEQ_FEATURE  | domain:Tyrosine-protein phosphatase                                 | 8   | 1.882352941 | 3.91E-04  | 208892_S_A` | 418 | 62   | 19113 | 5.899984566 | 0.40885755 | 0.12315458 | 0.639631   |
| GOTERM_BP_FAT   | GO:0006469~negative regulation of protein kinase activity           | 10  | 2.352941176 | 3.99E-04  | 206374_AT,` | 350 | 87   | 13528 | 4.442692939 | 0.60661783 | 0.01236626 | 0.695638   |
| GOTERM_CC_FAT   | GO:0045121~membrane raft                                            | 12  | 2.823529412 | 4.01E-04  | 205745_X_A` | 290 | 143  | 12782 | 3.69867374  | 0.10445054 | 0.05366525 | 0.527551   |
| GOTERM_BP_FAT   | GO:0042060~wound healing                                            | 15  | 3.529411765 | 4.39E-04  | 205207_AT,` | 350 | 191  | 13528 | 3.035452506 | 0.64238408 | 0.01343908 | 0.766438   |
| GOTERM_BP_FAT   | GO:0048545~response to steroid hormone stimulus                     | 15  | 3.529411765 | 4.63E-04  | 217173_S_A` | 350 | 192  | 13528 | 3.019642857 | 0.66142025 | 0.01396643 | 0.807044   |
| GOTERM_BP_FAT   | GO:0048146~positive regulation of fibroblast proliferation          | 6   | 1.411764706 | 4.67E-04  | 205463_S_A` | 350 | 26   | 13528 | 8.91956044  | 0.66503953 | 0.01392449 | 0.81502    |
| SP_PIR_KEYWORDS | transcription factor                                                | 8   | 1.882352941 | 5.05E-04  | 209636_AT,` | 418 | 65   | 19235 | 5.663599558 | 0.18402877 | 0.01442186 | 0.702185   |
| SP_PIR_KEYWORDS | ubl conjugation                                                     | 27  | 6.352941176 | 5.08E-04  | 209636_AT,` | 418 | 588  | 19235 | 2.113013866 | 0.18504747 | 0.01354907 | 0.706483   |
| GOTERM_BP_FAT   | GO:0033673~negative regulation of kinase activity                   | 10  | 2.352941176 | 5.13E-04  | 206374_AT,` | 350 | 90   | 13528 | 4.294603175 | 0.69904354 | 0.01508493 | 0.89443    |
| GOTERM_BP_FAT   | GO:0051341~regulation of oxidoreductase activity                    | 7   | 1.647058824 | 5.17E-04  | 201983_S_A` | 350 | 40   | 13528 |             | 6.764      | 0.70151145 | 0.01499917 |
| GOTERM_BP_FAT   | GO:0009725~response to hormone stimulus                             | 22  | 5.176470588 | 5.54E-04  | 214577_AT,` | 350 | 367  | 13528 | 2.316979369 | 0.7268073  | 0.01589185 | 0.966175   |
| GOTERM_BP_FAT   | GO:0042542~response to hydrogen peroxide                            | 8   | 1.882352941 | 5.60E-04  | 201464_X_A` | 350 | 56   | 13528 | 5.521632653 | 0.73044769 | 0.01586059 | 0.976115   |
| GOTERM_BP_FAT   | GO:0009612~response to mechanical stimulus                          | 8   | 1.882352941 | 5.60E-04  | 201464_X_A` | 350 | 56   | 13528 | 5.521632653 | 0.73044769 | 0.01586059 | 0.976115   |
| GOTERM_BP_FAT   | GO:0002521~leukocyte differentiation                                | 12  | 2.823529412 | 5.78E-04  | 205745_X_A` | 350 | 131  | 13528 | 3.540588877 | 0.7414398  | 0.01616463 | 1.006957   |
| GOTERM_BP_FAT   | GO:0007167~enzyme linked receptor protein signaling pathway         | 21  | 4.941176471 | 5.78E-04  | 201464_X_A` | 350 | 342  | 13528 | 2.373333333 | 0.74155311 | 0.01597888 | 1.007282   |
| GOTERM_MF_FAT   | GO:0042802~identical protein binding                                | 32  | 7.529411765 | 5.87E-04  | 212171_X_A` | 337 | 640  | 12983 | 1.926261128 | 0.31769649 | 0.04158618 | 0.873126   |
| GOTERM_BP_FAT   | GO:0045449~regulation of transcription                              | 93  | 21.88235294 | 5.96E-04  | 209636_AT,` | 350 | 2601 | 13528 | 1.38200033  | 0.75214974 | 0.01627702 | 1.038286   |
| GOTERM_BP_FAT   | GO:0009991~response to extracellular stimulus                       | 16  | 3.764705882 | 5.96E-04  | 201464_X_A` | 350 | 220  | 13528 | 2.811012987 | 0.75234726 | 0.01609841 | 1.038876   |
| GOTERM_BP_FAT   | GO:0044093~positive regulation of molecular function                | 30  | 7.058823529 | 6.08E-04  | 212470_AT,` | 350 | 586  | 13528 | 1.978742077 | 0.75913254 | 0.01622903 | 1.059444   |
| GOTERM_BP_FAT   | GO:0046649~lymphocyte activation                                    | 15  | 3.529411765 | 6.62E-04  | 205745_X_A` | 350 | 199  | 13528 | 2.913424264 | 0.78770729 | 0.01745707 | 1.152885   |
| GOTERM_BP_FAT   | GO:0009967~positive regulation of signal transduction               | 19  | 4.470588235 | 6.64E-04  | 209061_AT,` | 350 | 295  | 13528 | 2.489414044 | 0.78853477 | 0.01730575 | 1.155773   |
| GOTERM_BP_FAT   | GO:0042113~B cell activation                                        | 9   | 2.117647059 | 7.41E-04  | 205745_X_A` | 350 | 76   | 13528 | 4.577142857 | 0.82633059 | 0.01909050 | 1.2899     |
| UP_SEQ_FEATURE  | domain:RHD                                                          | 4   | 0.941176471 | 7.85E-04  | 209636_AT,` | 418 | 9    | 19113 | 20.32216906 | 0.65185898 | 0.19024984 | 1.279691   |
| GOTERM_BP_FAT   | GO:0050921~positive regulation of chemotaxis                        | 6   | 1.411764706 | 7.92E-04  | 205745_X_A` | 350 | 29   | 13528 | 7.996847291 | 0.84331163 | 0.02016206 | 1.37725    |
| GOTERM_BP_FAT   | GO:0051348~negative regulation of transferase activity              | 10  | 2.352941176 | 8.23E-04  | 206374_AT,` | 350 | 96   | 13528 | 4.026190476 | 0.85432979 | 0.02072154 | 1.431039   |
| UP_SEQ_FEATURE  | short sequence motif:Nuclear localization signal                    | 18  | 4.235294118 | 8.41E-04  | 209636_AT,` | 418 | 325  | 19113 | 2.532454914 | 0.67698504 | 0.17166927 | 1.369916   |
| GOTERM_BP_FAT   | GO:0051091~positive regulation of transcription factor activity     | 8   | 1.882352941 | 8.54E-04  | 209061_AT,` | 350 | 60   | 13528 | 5.15352381  | 0.86460495 | 0.02127114 | 1.484972   |
| UP_SEQ_FEATURE  | binding site:ATP                                                    | 25  | 5.882352941 | 8.81E-04  | 206411_S_A` | 418 | 542  | 19113 | 2.109081198 | 0.69398755 | 0.15562735 | 1.434993   |
| GOTERM_BP_FAT   | GO:0051099~positive regulation of binding                           | 9   | 2.117647059 | 8.82E-04  | 209061_AT,` | 350 | 78   | 13528 | 4.45978022  | 0.87303407 | 0.02171643 | 1.53234    |
| SP_PIR_KEYWORDS | nucleotide-binding                                                  | 57  | 13.41176471 | 8.93E-04  | 202847_AT,` | 418 | 1686 | 19235 | 1.555726302 | 0.30224759 | 0.0222421  | 1.239215   |
| SMART           | SM00195:DSPc                                                        | 6   | 1.411764706 | 9.78E-04  | 206374_AT,` | 247 | 29   | 9079  | 7.604914142 | 0.15400426 | 0.08021973 | 1.187242   |
| GOTERM_BP_FAT   | GO:0002763~positive regulation of myeloid leukocyte differentiation | 5   | 1.176470588 | 0.0010002 | 201464_X_A` | 350 | 18   | 13528 | 10.73650794 | 0.90383695 | 0.02434826 | 1.736852   |
| GOTERM_BP_FAT   | GO:0007584~response to nutrient                                     | 12  | 2.823529412 | 0.0010059 | 203665_AT,` | 350 | 140  | 13528 | 3.312979592 | 0.90509756 | 0.02423185 | 1.746554   |
| GOTERM_BP_FAT   | GO:0043405~regulation of MAP kinase activity                        | 12  | 2.823529412 | 0.0010664 | 204011_AT,` | 350 | 141  | 13528 | 3.289483283 | 0.91764699 | 0.02541115 | 1.850768   |
| GOTERM_BP_FAT   | GO:0050920~regulation of chemotaxis                                 | 6   | 1.411764706 | 0.001086  | 205745_X_A` | 350 | 31   | 13528 | 7.480921659 | 0.92134232 | 0.02561172 | 1.884477   |
| GOTERM_BP_FAT   | GO:0044092~negative regulation of molecular function                | 20  | 4.705882353 | 0.0010953 | 201468_S_A` | 350 | 334  | 13528 | 2.314456801 | 0.9230389  | 0.02557097 | 1.900483   |
| GOTERM_BP_FAT   | GO:0050795~regulation of behavior                                   | 7   | 1.647058824 | 0.0011071 | 205745_X_A` | 350 | 46   | 13528 | 5.88173913  | 0.9251366  | 0.02558784 | 1.920765   |
| GOTERM_BP_FAT   | GO:0008285~negative regulation of cell proliferation                | 21  | 4.941176471 | 0.001131  | 214211_AT,` | 350 | 361  | 13528 | 2.248421053 | 0.92920459 | 0.02587674 | 1.961758   |
| SP_PIR_KEYWORDS | chromosomal rearrangement                                           | 16  | 3.764705882 | 0.0011957 | 209636_AT,` | 418 | 279  | 19235 | 2.638953199 | 0.38255766 | 0.02796447 | 1.656753   |
| GOTERM_BP_FAT   | GO:0009611~response to wounding                                     | 27  | 6.352941176 | 0.0012891 | 209785_S_A` | 350 | 530  | 13528 | 1.96903504  | 0.95112457 | 0.02915936 | 2.233172   |
| KEGG_PATHWAY    | hsa05120:Epithelial cell signaling in Helicobacter pylori infection | 9   | 2.117647059 | 0.0014037 | 205745_X_A` | 165 | 68   | 5085  | 4.078877005 | 0.17273441 | 0.04630119 | 1.6333     |
| INTERPRO        | IPR000451:NF-kappa-B/Rel/dorsal                                     | 4   | 0.941176471 | 0.0014541 | 209636_AT,` | 401 | 10   | 16659 | 16.61745636 | 0.6666708  | 0.24016667 | 2.192253   |
| INTERPRO        | IPR008343:MAP kinase phosphatase                                    | 4   | 0.941176471 | 0.0014541 | 206374_AT,` | 401 | 10   | 16659 | 16.61745636 | 0.6666708  | 0.24016667 | 2.192253   |
| INTERPRO        | IPR011539:Rel homology                                              | 4   | 0.941176471 | 0.0014541 | 209636_AT,` | 401 | 10   | 16659 | 16.61745636 | 0.6666708  | 0.24016667 | 2.192253   |
| GOTERM_BP_FAT   | GO:0045639~positive regulation of myeloid cell differentiation      | 6   | 1.411764706 | 0.0014543 | 201464_X_A` | 350 | 33   | 13528 | 7.027532468 | 0.96681314 | 0.03252345 | 2.515946   |
| GOTERM_BP_FAT   | GO:0002685~regulation of leukocyte migration                        | 5   | 1.176470588 | 0.0015205 | 205745_X_A` | 350 | 20   | 13528 | 9.662857143 | 0.97157934 | 0.03365746 | 2.628963   |
| GOTERM_BP_FAT   | GO:0031960~response to corticosteroid stimulus                      | 9   | 2.117647059 | 0.0015487 | 204420_AT,` | 350 | 85   | 13528 | 4.092504202 | 0.97339846 | 0.0339511  | 2.677143   |
| GOTERM_CC_FAT   | GO:0005886~plasma membrane                                          | 110 | 25.88235294 | 0.0015666 | 207528_S_A` | 290 | 3777 | 12782 | 1.283649676 | 0.35023321 | 0.13386451 | 2.046001   |
| UP_SEQ_FEATURE  | domain:Protein kinase                                               | 22  | 5.176470588 | 0.0015968 | 206411_S_A` | 418 | 469  | 19113 | 2.144877118 | 0.88307712 | 0.23530643 | 2.585756   |
| GOTERM_BP_FAT   | GO:0002237~response to molecule of bacterial origin                 | 9   | 2.117647059 | 0.0016701 | 201464_X_A` | 350 | 86   | 13528 | 4.044916944 | 0.97998365 | 0.03622573 | 2.884034   |
| GOTERM_BP_FAT   | GO:0044272~sulfur compound biosynthetic process                     | 7   | 1.647058824 | 0.0017229 | 218871_X_A` | 350 | 50   | 13528 |             | 5.4112     | 0.98231649 | 0.0370092  |
| KEGG_PATHWAY    | hsa04060:Cytokine-cytokine receptor interaction                     | 19  | 4.470588235 | 0.0017645 | 201642_AT,` | 165 | 262  | 5085  | 2.234906315 | 0.21212801 | 0.04656491 | 2.049203   |

|                 |                                                                                |    |             |           |            |     |      |       |             |            |            |          |
|-----------------|--------------------------------------------------------------------------------|----|-------------|-----------|------------|-----|------|-------|-------------|------------|------------|----------|
| GOTERM_BP_FAT   | GO:0016051~carbohydrate biosynthetic process                                   | 10 | 2.352941176 | 0.0017779 | 218871_X_A | 350 | 107  | 13528 | 3.612283044 | 0.98445321 | 0.03782087 | 3.067479 |
| KEGG_PATHWAY    | hsa04012:Erbb signaling pathway                                                | 10 | 2.352941176 | 0.0017968 | 201464_X_A | 165 | 87   | 5085  | 3.542319749 | 0.21555858 | 0.03965617 | 2.086315 |
| GOTERM_BP_FAT   | GO:0050730~regulation of peptidyl-tyrosine phosphorylation                     | 8  | 1.882352941 | 0.0017988 | 205266_AT, | 350 | 68   | 13528 | 4.547226891 | 0.98519782 | 0.03791378 | 3.103069 |
| INTERPRO        | IPR000340:Protein-tyrosine phosphatase, dual specificity                       | 6  | 1.411764706 | 0.001802  | 206374_AT, | 401 | 37   | 16659 | 6.736806632 | 0.74378643 | 0.23841142 | 2.710122 |
| GOTERM_BP_FAT   | GO:0031667~response to nutrient levels                                         | 14 | 3.294117647 | 0.0018229 | 201464_X_A | 350 | 197  | 13528 | 2.74680203  | 0.98601139 | 0.03807014 | 3.144045 |
| GOTERM_BP_FAT   | GO:0001836~release of cytochrome c from mitochondria                           | 5  | 1.176470588 | 0.0018404 | 201464_X_A | 350 | 21   | 13528 | 9.202721088 | 0.98657406 | 0.03808956 | 3.173792 |
| GOTERM_MF_FAT   | GO:0015175~neutral amino acid transmembrane transporter activity               | 5  | 1.176470588 | 0.0018608 | 212810_S_A | 337 | 21   | 12983 | 9.172672036 | 0.70255745 | 0.11419055 | 2.74325  |
| GOTERM_BP_FAT   | GO:0048145~regulation of fibroblast proliferation                              | 6  | 1.411764706 | 0.0019072 | 205463_S_A | 350 | 35   | 13528 | 6.625959184 | 0.98851983 | 0.03910019 | 3.287155 |
| GOTERM_BP_FAT   | GO:0050865~regulation of cell activation                                       | 13 | 3.058823529 | 0.0019588 | 220049_S_A | 350 | 175  | 13528 | 2.87124898  | 0.98982818 | 0.0397897  | 3.374674 |
| SP_PIR_KEYWORDS | dna-binding                                                                    | 60 | 14.11764706 | 0.0020731 | 209636_AT, | 418 | 1868 | 19235 | 1.478053953 | 0.56669673 | 0.04539924 | 2.856109 |
| SP_PIR_KEYWORDS | protein phosphatase                                                            | 10 | 2.352941176 | 0.0021266 | 208892_S_A | 418 | 130  | 19235 | 3.539749724 | 0.57596144 | 0.04414998 | 2.92883  |
| GOTERM_BP_FAT   | GO:0043388~positive regulation of DNA binding                                  | 8  | 1.882352941 | 0.002129  | 209061_AT, | 350 | 70   | 13528 | 4.417306122 | 0.99317485 | 0.04280376 | 3.662713 |
| GOTERM_BP_FAT   | GO:0045637~regulation of myeloid cell differentiation                          | 8  | 1.882352941 | 0.002129  | 201464_X_A | 350 | 70   | 13528 | 4.417306122 | 0.99317485 | 0.04280376 | 3.662713 |
| UP_SEQ_FEATURE  | active site:Phosphocysteine intermediate                                       | 8  | 1.882352941 | 0.0022362 | 208892_S_A | 418 | 83   | 19113 | 4.407217386 | 0.95053705 | 0.2839885  | 3.603351 |
| SP_PIR_KEYWORDS | growth factor                                                                  | 10 | 2.352941176 | 0.0022409 | 205266_AT, | 418 | 131  | 19235 | 3.512728734 | 0.59508851 | 0.04419785 | 3.083944 |
| INTERPRO        | IPR000340:Dual specificity phosphatase, catalytic domain                       | 6  | 1.411764706 | 0.0022887 | 206374_AT, | 401 | 39   | 16659 | 6.391329369 | 0.8227103  | 0.25048456 | 3.43026  |
| GOTERM_BP_FAT   | GO:0006986~response to unfolded protein                                        | 8  | 1.882352941 | 0.0023107 | 208744_X_A | 350 | 71   | 13528 | 4.355090543 | 0.99554315 | 0.04598157 | 3.969415 |
| GOTERM_BP_FAT   | GO:0009070~serine family amino acid biosynthetic process                       | 4  | 0.941176471 | 0.0024077 | 201397_AT, | 350 | 11   | 13528 | 14.05506494 | 0.99645007 | 0.04746441 | 4.132748 |
| GOTERM_BP_FAT   | GO:0060323~head morphogenesis                                                  | 4  | 0.941176471 | 0.0024077 | 202310_S_A | 350 | 11   | 13528 | 14.05506494 | 0.99645007 | 0.04746441 | 4.132748 |
| BBID            | 114.Genomic_reformatting_Brain_Ischemia                                        | 5  | 1.176470588 | 0.0025161 | 201464_X_A | 28  | 9    | 358   | 7.103174603 | 0.15104635 | 0.15104635 | 2.534922 |
| GOTERM_BP_FAT   | GO:0000096~sulfur amino acid metabolic process                                 | 5  | 1.176470588 | 0.0026146 | 220346_AT, | 350 | 23   | 13528 | 8.402484472 | 0.99781491 | 0.05101264 | 4.4802   |
| KEGG_PATHWAY    | hsa05220:Chronic myeloid leukemia                                              | 9  | 2.117647059 | 0.0026469 | 206665_S_A | 165 | 75   | 5085  | 3.698181818 | 0.30079439 | 0.04983134 | 3.059527 |
| GOTERM_BP_FAT   | GO:0008361~regulation of cell size                                             | 14 | 3.294117647 | 0.0027019 | 214577_AT, | 350 | 206  | 13528 | 2.626796117 | 0.98221996 | 0.0522396  | 4.626617 |
| GOTERM_BP_FAT   | GO:0045767~regulation of anti-apoptosis                                        | 6  | 1.411764706 | 0.0027687 | 206665_S_A | 350 | 38   | 13528 | 6.102857143 | 0.99847788 | 0.05305862 | 4.738254 |
| GOTERM_BP_FAT   | GO:0042035~regulation of cytokine biosynthetic process                         | 8  | 1.882352941 | 0.0029282 | 203665_AT, | 350 | 74   | 13528 | 4.178532819 | 0.99895329 | 0.05557989 | 5.004776 |
| GOTERM_BP_FAT   | GO:0000082~G1/S transition of mitotic cell cycle                               | 7  | 1.647058824 | 0.0030939 | 205745_X_A | 350 | 56   | 13528 | 4.831428561 | 0.99929056 | 0.05816566 | 5.280814 |
| GOTERM_MF_FAT   | GO:0008083~growth factor activity                                              | 12 | 2.823529412 | 0.0031303 | 205266_AT, | 337 | 161  | 12983 | 2.871445159 | 0.87010707 | 0.1693523  | 4.574276 |
| GOTERM_BP_FAT   | GO:0000302~response to reactive oxygen species                                 | 8  | 1.882352941 | 0.0031599 | 201464_X_A | 350 | 75   | 13528 | 4.122819048 | 0.99939226 | 0.05889722 | 5.390406 |
| INTERPRO        | IPR000387:Protein-tyrosine phosphatase                                         | 8  | 1.882352941 | 0.003303  | 208892_S_A | 401 | 81   | 16659 | 4.103075644 | 0.91773987 | 0.3001144  | 4.914933 |
| UP_SEQ_FEATURE  | cross-link:Glycyl lysine isopeptide (Lys-Gly) (interchain with G-Cter in SUMO) | 8  | 1.882352941 | 0.0033211 | 204970_S_A | 418 | 89   | 19113 | 4.110101607 | 0.98852592 | 0.36030671 | 5.307353 |
| GOTERM_BP_FAT   | GO:0045787~positive regulation of cell cycle                                   | 7  | 1.647058824 | 0.0033844 | 205745_X_A | 350 | 57   | 13528 | 4.746666667 | 0.9996413  | 0.06246032 | 5.762922 |
| INTERPRO        | IPR000387:Dual-specific/protein-tyrosine phosphatase, conserved region         | 8  | 1.882352941 | 0.0035385 | 208892_S_A | 401 | 82   | 16659 | 4.053038136 | 0.93118369 | 0.28433229 | 5.256663 |
| GOTERM_BP_FAT   | GO:0007243~protein kinase cascade                                              | 20 | 4.705882353 | 0.0035451 | 203665_AT, | 350 | 370  | 13528 | 2.089266409 | 0.999754   | 0.06482119 | 6.02847  |
| GOTERM_CC_FAT   | GO:0005615~extracellular space                                                 | 28 | 6.588235294 | 0.0035594 | 212171_X_A | 290 | 685  | 12782 | 1.801641077 | 0.62490182 | 0.21740649 | 4.592775 |
| GOTERM_BP_FAT   | GO:0032768~regulation of monooxygenase activity                                | 5  | 1.176470588 | 0.0035867 | 201983_X_A | 350 | 25   | 13528 | 7.730285714 | 0.9997769  | 0.06505069 | 6.097137 |
| GOTERM_BP_FAT   | GO:0031657~regulation of cyclin-dependent protein kinase activity during G1/   | 3  | 0.705882353 | 0.0038473 | 205745_X_A | 350 | 4    | 13528 | 28.98857143 | 0.99987903 | 0.06908486 | 6.526222 |
| GOTERM_BP_FAT   | GO:0031659~positive regulation of cyclin-dependent protein kinase activity du  | 3  | 0.705882353 | 0.0038473 | 205745_X_A | 350 | 4    | 13528 | 28.98857143 | 0.99987903 | 0.06908486 | 6.526222 |
| GOTERM_BP_FAT   | GO:0002694~regulation of leukocyte activation                                  | 12 | 2.823529412 | 0.0038715 | 220049_S_A | 350 | 166  | 13528 | 2.794079174 | 0.99988572 | 0.06897683 | 6.565974 |
| GOTERM_BP_FAT   | GO:0002761~regulation of myeloid leukocyte differentiation                     | 6  | 1.411764706 | 0.0038814 | 201464_X_A | 350 | 41   | 13528 | 5.65630662  | 0.99988836 | 0.0686272  | 6.582339 |
| GOTERM_BP_FAT   | GO:0051092~positive regulation of NF-kappaB transcription factor activity      | 6  | 1.411764706 | 0.0038814 | 210018_X_A | 350 | 41   | 13528 | 5.65630662  | 0.99988836 | 0.0686272  | 6.582339 |
| GOTERM_BP_FAT   | GO:0042493~response to drug                                                    | 14 | 3.294117647 | 0.0040195 | 201464_X_A | 350 | 216  | 13528 | 2.505185185 | 0.99991929 | 0.0704544  | 6.808824 |
| GOTERM_MF_FAT   | GO:0033549~MAP kinase phosphatase activity                                     | 4  | 0.941176471 | 0.0040511 | 206374_AT, | 337 | 13   | 12983 | 11.85391463 | 0.92882795 | 0.19765874 | 5.882207 |
| GOTERM_MF_FAT   | GO:0017017~MAP kinase tyrosine/serine/threonine phosphatase activity           | 4  | 0.941176471 | 0.0040511 | 206374_AT, | 337 | 13   | 12983 | 11.85391463 | 0.92882795 | 0.19765874 | 5.882207 |
| GOTERM_MF_FAT   | GO:0015171~amino acid transmembrane transporter activity                       | 7  | 1.647058824 | 0.004084  | 212810_S_A | 337 | 59   | 12983 | 4.570789116 | 0.93034072 | 0.18529875 | 5.928582 |
| GOTERM_BP_FAT   | GO:0009069~serine family amino acid metabolic process                          | 5  | 1.176470588 | 0.0041538 | 201397_AT, | 350 | 26   | 13528 | 7.432967033 | 0.99994113 | 0.07218637 | 7.02856  |
| GOTERM_BP_FAT   | GO:0045766~positive regulation of angiogenesis                                 | 5  | 1.176470588 | 0.0041538 | 209360_S_A | 350 | 26   | 13528 | 7.432967033 | 0.99994113 | 0.07218637 | 7.02856  |
| GOTERM_CC_FAT   | GO:0031981~nuclear lumen                                                       | 49 | 11.52941176 | 0.0042185 | 209636_AT, | 290 | 1450 | 12782 | 1.489460166 | 0.68730956 | 0.20745684 | 5.421603 |
| GOTERM_BP_FAT   | GO:0030307~positive regulation of cell growth                                  | 6  | 1.411764706 | 0.0043146 | 205745_X_A | 350 | 42   | 13528 | 5.21632653  | 0.99995965 | 0.07432935 | 7.29103  |
| GOTERM_BP_FAT   | GO:0051591~response to cAMP                                                    | 6  | 1.411764706 | 0.0043146 | 201464_X_A | 350 | 42   | 13528 | 5.21632653  | 0.99995965 | 0.07432935 | 7.29103  |
| SP_PIR_KEYWORDS | LIM domain                                                                     | 7  | 1.647058824 | 0.0043779 | 215706_X_A | 418 | 71   | 19235 | 4.536862322 | 0.82935391 | 0.08075102 | 5.942481 |
| GOTERM_BP_FAT   | GO:0051240~positive regulation of multicellular organismal process             | 15 | 3.529411765 | 0.0044529 | 205745_X_A | 350 | 244  | 13528 | 2.376112412 | 0.99997085 | 0.07606536 | 7.516214 |
| GOTERM_BP_FAT   | GO:0060348~bone development                                                    | 10 | 2.352941176 | 0.0045629 | 214985_AT, | 350 | 123  | 13528 | 3.142392567 | 0.99997749 | 0.07731182 | 7.695031 |
| GOTERM_BP_FAT   | GO:0001558~regulation of cell growth                                           | 13 | 3.058823529 | 0.0045648 | 205745_X_A | 350 | 194  | 13528 | 2.590044183 | 0.99997759 | 0.07678822 | 7.6981   |
| SP_PIR_KEYWORDS | protein kinase inhibitor                                                       | 4  | 0.941176471 | 0.0045915 | 202241_AT, | 418 | 16   | 19235 | 11.5041866  | 0.84349013 | 0.08084604 | 6.223867 |
| GOTERM_BP_FAT   | GO:0009636~response to toxin                                                   | 7  | 1.647058824 | 0.0047528 | 201468_X_A | 350 | 61   | 13528 | 4.435409836 | 0.9999856  | 0.07926041 | 8.002771 |

|                 |                                                                   |    |             |           |             |     |      |       |             |            |            |          |
|-----------------|-------------------------------------------------------------------|----|-------------|-----------|-------------|-----|------|-------|-------------|------------|------------|----------|
| GOTERM_BP_FAT   | GO:0045428~regulation of nitric oxide biosynthetic process        | 5  | 1.176470588 | 0.0047786 | 205580_S_A` | 350 | 27   | 13528 | 7.157671958 | 0.99998644 | 0.07911169 | 8.044484 |
| GOTERM_BP_FAT   | GO:0060322~head development                                       | 4  | 0.941176471 | 0.005015  | 202310_S_A` | 350 | 14   | 13528 | 11.04326531 | 0.99999223 | 0.08228943 | 8.426223 |
| GOTERM_BP_FAT   | GO:0010171~body morphogenesis                                     | 4  | 0.941176471 | 0.005015  | 202310_S_A` | 350 | 14   | 13528 | 11.04326531 | 0.99999223 | 0.08228943 | 8.426223 |
| INTERPRO        | IPR002293:Amino acid/polyamine transporter I                      | 4  | 0.941176471 | 0.0050428 | 207528_S_A` | 401 | 15   | 16659 | 11.07830424 | 0.97800468 | 0.34564342 | 7.412145 |
| GOTERM_BP_FAT   | GO:0046165~alcohol biosynthetic process                           | 6  | 1.411764706 | 0.0052824 | 202847_AT,` | 350 | 44   | 13528 | 5.270649351 | 0.99999586 | 0.08589427 | 8.856194 |
| GOTERM_MF_FAT   | GO:0008138~protein tyrosine/serine/threonine phosphatase activity | 6  | 1.411764706 | 0.005349  | 206374_AT,` | 337 | 44   | 12983 | 5.253439439 | 0.96954552 | 0.22072746 | 7.697251 |
| GOTERM_BP_FAT   | GO:0016477~cell migration                                         | 16 | 3.764705882 | 0.0054144 | 216959_X_A` | 350 | 276  | 13528 | 2.240662526 | 0.99999696 | 0.08734425 | 9.067675 |
| GOTERM_MF_FAT   | GO:0048037~cofactor binding                                       | 15 | 3.529411765 | 0.0054455 | 201468_S_A` | 337 | 249  | 12983 | 2.320796539 | 0.97141094 | 0.21099458 | 7.830996 |
| INTERPRO        | IPR016130:Protein-tyrosine phosphatase, active site               | 8  | 1.882352941 | 0.0055631 | 208892_S_A` | 401 | 89   | 16659 | 3.734259856 | 0.98518169 | 0.34373408 | 8.147049 |
| GOTERM_BP_FAT   | GO:0045765~regulation of angiogenesis                             | 7  | 1.647058824 | 0.0055721 | 203665_AT,` | 350 | 63   | 13528 | 4.294603175 | 0.9999979  | 0.08916488 | 9.319715 |
| INTERPRO        | IPR00719:Protein kinase, core                                     | 22 | 5.176470588 | 0.0056631 | 206411_S_A` | 401 | 476  | 16659 | 1.920084243 | 0.98626433 | 0.32280518 | 8.287544 |
| GOTERM_CC_FAT   | GO:0009986~cell surface                                           | 17 | 4           | 0.0057725 | 216959_X_A` | 290 | 348  | 12782 | 2.153131193 | 0.79648679 | 0.23305286 | 7.349309 |
| GOTERM_BP_FAT   | GO:0006928~cell motion                                            | 23 | 5.411764706 | 0.0059055 | 216959_X_A` | 350 | 475  | 13528 | 1.871542857 | 0.99999904 | 0.09361997 | 9.850596 |
| GOTERM_BP_FAT   | GO:0048511~rhythmic process                                       | 10 | 2.352941176 | 0.0059128 | 209674_AT,` | 350 | 128  | 13528 | 3.019642857 | 0.99999906 | 0.09310254 | 9.862234 |
| GOTERM_BP_FAT   | GO:0002687~positive regulation of leukocyte migration             | 4  | 0.941176471 | 0.0061502 | 205745_X_A` | 350 | 15   | 13528 | 10.30704762 | 0.99999946 | 0.09602159 | 10.23828 |
| GOTERM_BP_FAT   | GO:0032642~regulation of chemokine production                     | 4  | 0.941176471 | 0.0061502 | 205745_X_A` | 350 | 15   | 13528 | 10.30704762 | 0.99999946 | 0.09602159 | 10.23828 |
| GOTERM_BP_FAT   | GO:0000097~sulfur amino acid biosynthetic process                 | 4  | 0.941176471 | 0.0061502 | 220346_AT,` | 350 | 15   | 13528 | 10.30704762 | 0.99999946 | 0.09602159 | 10.23828 |
| GOTERM_BP_FAT   | GO:0051674~localization of cell                                   | 17 | 4           | 0.0061769 | 216959_X_A` | 350 | 307  | 13528 | 2.14030712  | 0.9999995  | 0.09578261 | 10.28051 |
| GOTERM_BP_FAT   | GO:0048870~cell motility                                          | 17 | 4           | 0.0061769 | 216959_X_A` | 350 | 307  | 13528 | 2.14030712  | 0.9999995  | 0.09578261 | 10.28051 |
| GOTERM_BP_FAT   | GO:0010038~response to metal ion                                  | 10 | 2.352941176 | 0.0062163 | 215707_S_A` | 350 | 129  | 13528 | 2.996234773 | 0.99999954 | 0.09573397 | 10.34284 |
| PIR_SUPERFAMILY | PIRSF006060:AA_transporter                                        | 4  | 0.941176471 | 0.0063146 | 207528_S_A` | 194 | 15   | 7396  | 10.16632302 | 0.74545465 | 0.74545465 | 7.725063 |
| SP_PIR_KEYWORDS | cytoskeleton                                                      | 25 | 5.882352941 | 0.006335  | 200960_S_A` | 418 | 636  | 19235 | 1.808834372 | 0.92278116 | 0.10537683 | 8.491463 |
| GOTERM_BP_FAT   | GO:0007623~circadian rhythm                                       | 6  | 1.411764706 | 0.0063945 | 201464_X_A` | 350 | 46   | 13528 | 5.041490683 | 0.9999997  | 0.09770696 | 10.62383 |
| PIR_SUPERFAMILY | PIRSF001719:fos transforming protein                              | 3  | 0.705882353 | 0.0064319 | 204420_AT,` | 194 | 5    | 7396  | 22.8742268  | 0.75186327 | 0.50186676 | 7.863214 |
| GOTERM_BP_FAT   | GO:0030217~T cell differentiation                                 | 7  | 1.647058824 | 0.00649   | 205745_X_A` | 350 | 65   | 13528 | 4.162461538 | 0.99999976 | 0.09845694 | 10.77421 |
| GOTERM_BP_FAT   | GO:0006955~immune response                                        | 30 | 7.058823529 | 0.0066968 | 214211_AT,` | 350 | 690  | 13528 | 1.680496894 | 0.99999885 | 0.10078925 | 11.09478 |
| GOTERM_BP_FAT   | GO:0033273~response to vitamin                                    | 7  | 1.647058824 | 0.0069881 | 204341_AT,` | 350 | 66   | 13528 | 4.099393939 | 0.99999993 | 0.10428285 | 11.55407 |
| GOTERM_BP_FAT   | GO:0045768~positive regulation of anti-apoptosis                  | 5  | 1.176470588 | 0.0070233 | 206665_S_A` | 350 | 30   | 13528 | 6.441904762 | 0.99999993 | 0.10412145 | 11.60904 |
| GOTERM_BP_FAT   | GO:0048878~chemical homeostasis                                   | 24 | 5.647058824 | 0.0070558 | 214211_AT,` | 350 | 512  | 13528 | 1.811785714 | 0.99999994 | 0.10392258 | 11.65958 |
| SP_PIR_KEYWORDS | lipoprotein                                                       | 25 | 5.882352941 | 0.0070839 | 205745_S_A` | 418 | 642  | 19235 | 1.791929377 | 0.94301452 | 0.11252354 | 9.449789 |
| INTERPRO        | IPR017441:Protein kinase, ATP binding site                        | 21 | 4.941176471 | 0.0071222 | 201739_AT,` | 401 | 455  | 16659 | 1.917398811 | 0.99546764 | 0.36218654 | 10.31644 |
| GOTERM_BP_FAT   | GO:0009628~response to abiotic stimulus                           | 19 | 4.470588235 | 0.0072064 | 201464_X_A` | 350 | 368  | 13528 | 1.995590062 | 0.99999996 | 0.10536787 | 11.89398 |
| INTERPRO        | IPR001395:Aldo/keto reductase                                     | 4  | 0.941176471 | 0.0072734 | 216594_X_A` | 401 | 17   | 16659 | 9.774974329 | 0.99595979 | 0.34554886 | 10.5242  |
| GOTERM_BP_FAT   | GO:0001817~regulation of cytokine production                      | 12 | 2.823529412 | 0.0073498 | 205745_X_A` | 350 | 181  | 13528 | 2.562525651 | 0.99999997 | 0.10669247 | 12.11654 |
| SP_PIR_KEYWORDS | amino-acid transport                                              | 5  | 1.176470588 | 0.0074139 | 207528_S_A` | 418 | 36   | 19235 | 6.391214779 | 0.95015939 | 0.11304143 | 9.869121 |
| GOTERM_BP_FAT   | GO:0050999~regulation of nitric-oxide synthase activity           | 4  | 0.941176471 | 0.0074264 | 201983_S_A` | 350 | 16   | 13528 | 9.662857143 | 0.99999997 | 0.1070853  | 12.23519 |
| KEGG_PATHWAY    | hsa05215:Prostate cancer                                          | 9  | 2.117647059 | 0.0075743 | 201983_S_A` | 165 | 89   | 5085  | 3.116445352 | 0.64171433 | 0.12041325 | 8.52798  |
| SP_PIR_KEYWORDS | Chaperone                                                         | 10 | 2.352941176 | 0.0076579 | 202843_AT,` | 418 | 158  | 19235 | 2.912452305 | 0.95486604 | 0.11232865 | 10.17798 |
| GOTERM_BP_FAT   | GO:0045793~positive regulation of cell size                       | 6  | 1.411764706 | 0.0076612 | 205745_X_A` | 350 | 48   | 13528 | 4.831428571 | 0.99999998 | 0.10961809 | 12.59794 |
| GOTERM_BP_FAT   | GO:0030183~B cell differentiation                                 | 6  | 1.411764706 | 0.0076612 | 205745_X_A` | 350 | 48   | 13528 | 4.831428571 | 0.99999998 | 0.10961809 | 12.59794 |
| GOTERM_BP_FAT   | GO:0006366~transcription from RNA polymerase II promoter          | 14 | 3.294117647 | 0.0078482 | 205193_AT,` | 350 | 234  | 13528 | 2.312478632 | 0.99999999 | 0.11147069 | 12.88588 |
| GOTERM_BP_FAT   | GO:0008637~apoptotic mitochondrial changes                        | 5  | 1.176470588 | 0.0079029 | 201464_X_A` | 350 | 31   | 13528 | 6.234101382 | 0.99999999 | 0.11153208 | 12.96995 |
| GOTERM_MF_FAT   | GO:0015296~anion:cation symporter activity                        | 5  | 1.176470588 | 0.0079861 | 212810_S_A` | 337 | 31   | 12983 | 6.213745573 | 0.9945918  | 0.27836801 | 11.28527 |
| GOTERM_MF_FAT   | GO:0046982~protein heterodimerization activity                    | 13 | 3.058823529 | 0.0079875 | 214985_AT,` | 337 | 208  | 12983 | 2.407826409 | 0.99459656 | 0.26442381 | 11.28706 |
| INTERPRO        | IPR001781:Zinc finger, LIM-type                                   | 7  | 1.647058824 | 0.008123  | 215706_X_A` | 401 | 73   | 16659 | 3.983636798 | 0.99788335 | 0.35586781 | 11.68368 |
| GOTERM_CC_FAT   | GO:0005794~Golgi apparatus                                        | 32 | 7.529411765 | 0.0081427 | 218871_X_A` | 290 | 872  | 12782 | 1.617462828 | 0.89443284 | 0.27472264 | 10.21981 |
| GOTERM_BP_FAT   | GO:0032101~regulation of response to external stimulus            | 11 | 2.588235294 | 0.0082392 | 205745_X_A` | 350 | 159  | 13528 | 2.673998203 | 1          | 0.11531945 | 13.48494 |
| GOTERM_MF_FAT   | GO:0017076~purine nucleotide binding                              | 67 | 15.76470588 | 0.0083279 | 209307_AT,` | 337 | 1918 | 12983 | 1.345771591 | 0.99567861 | 0.26099781 | 11.74066 |
| GOTERM_CC_FAT   | GO:0005925~focal adhesion                                         | 8  | 1.882352941 | 0.0083464 | 205745_X_A` | 290 | 102  | 12782 | 3.456930358 | 0.9002297  | 0.25032132 | 10.4626  |
| INTERPRO        | IPR002909:Cell surface receptor IPT/TIG                           | 5  | 1.176470588 | 0.008595  | 209636_AT,` | 401 | 34   | 16659 | 6.109358956 | 0.99852234 | 0.35240279 | 12.32174 |
| GOTERM_BP_FAT   | GO:0019221~cytokine-mediated signaling pathway                    | 7  | 1.647058824 | 0.009259  | 205282_AT,` | 350 | 70   | 13528 | 3.865142857 | 1          | 0.12794202 | 15.0294  |
| UP_SEQ_FEATURE  | domain:SPR                                                        | 3  | 0.705882353 | 0.0092739 | 204011_AT,` | 418 | 7    | 19113 | 19.59637731 | 0.99999632 | 0.67939424 | 14.16451 |
| GOTERM_BP_FAT   | GO:0006534~cysteine metabolic process                             | 3  | 0.705882353 | 0.0092937 | 206085_S_A` | 350 | 6    | 13528 | 19.32571429 | 1          | 0.12764268 | 15.08151 |
| GOTERM_BP_FAT   | GO:0019725~cellular homeostasis                                   | 22 | 5.176470588 | 0.0095588 | 214211_AT,` | 350 | 466  | 13528 | 1.824745555 | 1          | 0.13029176 | 15.47846 |
| GOTERM_BP_FAT   | GO:0001503~ossification                                           | 9  | 2.117647059 | 0.0098123 | 214985_AT,` | 350 | 115  | 13528 | 3.02489441  | 1          | 0.13275399 | 15.85635 |

|                 |                                                                           |    |             |           |             |     |     |       |             |            |            |          |
|-----------------|---------------------------------------------------------------------------|----|-------------|-----------|-------------|-----|-----|-------|-------------|------------|------------|----------|
| GOTERM_BP_FAT   | GO:0006790~sulfur metabolic process                                       | 9  | 2.117647059 | 0.0098123 | 218871_X_A' | 350 | 115 | 13528 | 3.02489441  | 1          | 0.13275399 | 15.85635 |
| SP_PIR_KEYWORDS | mitogen                                                                   | 5  | 1.176470588 | 0.0098403 | 208378_X_A' | 418 | 39  | 19235 | 5.899582873 | 0.98141241 | 0.1372258  | 12.89728 |
| GOTERM_CC_FAT   | GO:0005924~cell-substrate adherens junction                               | 8  | 1.882352941 | 0.0102114 | 205745_X_A' | 290 | 106 | 12782 | 3.326480156 | 0.94054764 | 0.26920331 | 12.65776 |
| UP_SEQ_FEATURE  | domain:Rhodanese                                                          | 4  | 0.941176471 | 0.0102409 | 206374_AT,: | 418 | 21  | 19113 | 8.709501025 | 0.99999901 | 0.68400823 | 15.52767 |
| GOTERM_MF_FAT   | GO:0016563~transcription activator activity                               | 20 | 4.705882353 | 0.0104969 | 209636_AT,: | 337 | 410 | 12983 | 1.879279149 | 0.99896111 | 0.3034097  | 14.58001 |
| GOTERM_MF_FAT   | GO:0004721~phosphoprotein phosphatase activity                            | 11 | 2.588235294 | 0.0107453 | 208892_S_A' | 337 | 165 | 12983 | 2.56834817  | 0.99911774 | 0.29647459 | 14.89966 |
| GOTERM_BP_FAT   | GO:0032535~regulation of cellular component size                          | 15 | 3.529411765 | 0.010836  | 214577_AT,: | 350 | 271 | 13528 | 2.139377965 | 1          | 0.14479057 | 17.36657 |
| GOTERM_BP_FAT   | GO:0034976~response to endoplasmic reticulum stress                       | 5  | 1.176470588 | 0.0109659 | 209383_AT,: | 350 | 34  | 13528 | 5.684033613 | 1          | 0.14557727 | 17.55638 |
| SP_PIR_KEYWORDS | pyridoxal phosphate                                                       | 6  | 1.411764706 | 0.0110018 | 200790_AT,: | 418 | 62  | 19235 | 4.453233524 | 0.98841782 | 0.14719516 | 14.31322 |
| INTERPRO        | IPR007875:Sprouty                                                         | 3  | 0.705882353 | 0.0111494 | 204011_AT,: | 401 | 7   | 16659 | 17.80441753 | 0.9997893  | 0.41084582 | 15.70062 |
| INTERPRO        | IPR014393: Dual specificity protein phosphatase (MAP kinase phosphatase)  | 3  | 0.705882353 | 0.0111494 | 208892_S_A' | 401 | 7   | 16659 | 17.80441753 | 0.9997893  | 0.41084582 | 15.70062 |
| GOTERM_BP_FAT   | GO:0032268~regulation of cellular protein metabolic process               | 22 | 5.176470588 | 0.0116167 | 201464_X_A' | 350 | 474 | 13528 | 1.793948162 | 1          | 0.15270782 | 18.50095 |
| GOTERM_BP_FAT   | GO:0006984~ER-nuclear signaling pathway                                   | 5  | 1.176470588 | 0.0121348 | 209383_AT,: | 350 | 35  | 13528 | 5.521632653 | 1          | 0.15810755 | 19.24574 |
| GOTERM_BP_FAT   | GO:0050927~positive regulation of positive chemotaxis                     | 4  | 0.941176471 | 0.0121376 | 212171_X_A' | 350 | 19  | 13528 | 8.137142857 | 1          | 0.15727316 | 19.24977 |
| GOTERM_BP_FAT   | GO:0050926~regulation of positive chemotaxis                              | 4  | 0.941176471 | 0.0121376 | 212171_X_A' | 350 | 19  | 13528 | 8.137142857 | 1          | 0.15727316 | 19.24977 |
| GOTERM_MF_FAT   | GO:0005275~amine transmembrane transporter activity                       | 7  | 1.647058824 | 0.0121773 | 212810_S_A' | 337 | 74  | 12983 | 3.644277809 | 0.99965643 | 0.31601213 | 16.721   |
| GOTERM_BP_FAT   | GO:0010648~negative regulation of cell communication                      | 14 | 3.294117647 | 0.0123374 | 202241_AT,: | 350 | 248 | 13528 | 2.181935484 | 1          | 0.15878761 | 19.53523 |
| GOTERM_BP_FAT   | GO:0008360~regulation of cell shape                                       | 6  | 1.411764706 | 0.0124886 | 209209_S_A' | 350 | 54  | 13528 | 4.294603175 | 1          | 0.15971027 | 19.7507  |
| UP_SEQ_FEATURE  | domain:Helix-loop-helix motif                                             | 8  | 1.882352941 | 0.0125225 | 209061_AT,: | 418 | 114 | 19113 | 3.208763536 | 0.99999996 | 0.7279695  | 18.66383 |
| GOTERM_BP_FAT   | GO:0051251~positive regulation of lymphocyte activation                   | 8  | 1.882352941 | 0.012676  | 220049_S_A' | 350 | 97  | 13528 | 3.187746686 | 1          | 0.16104423 | 20.01691 |
| GOTERM_BP_FAT   | GO:0017085~response to insecticide                                        | 3  | 0.705882353 | 0.0127906 | 216594_X_A' | 350 | 7   | 13528 | 16.56489796 | 1          | 0.16151443 | 20.1792  |
| GOTERM_BP_FAT   | GO:0051150~regulation of smooth muscle cell differentiation               | 3  | 0.705882353 | 0.0127906 | 215253_S_A' | 350 | 7   | 13528 | 16.56489796 | 1          | 0.16151443 | 20.1792  |
| GOTERM_MF_FAT   | GO:0003690~double-stranded DNA binding                                    | 8  | 1.882352941 | 0.0128663 | 201464_X_A' | 337 | 97  | 12983 | 3.177337942 | 0.99978184 | 0.31832046 | 17.5842  |
| SMART           | SM00429:IPT                                                               | 5  | 1.176470588 | 0.0128859 | 209636_AT,: | 247 | 34  | 9079  | 5.405453679 | 0.8911525  | 0.52253726 | 14.64781 |
| GOTERM_BP_FAT   | GO:0007264~small GTPase mediated signal transduction                      | 16 | 3.764705882 | 0.0129409 | 203665_AT,: | 350 | 305 | 13528 | 2.027615925 | 1          | 0.16239283 | 20.3918  |
| GOTERM_BP_FAT   | GO:0043086~negative regulation of catalytic activity                      | 15 | 3.529411765 | 0.0129445 | 201468_S_A' | 350 | 277 | 13528 | 2.093037648 | 1          | 0.1615758  | 20.39688 |
| UP_SEQ_FEATURE  | domain:CH                                                                 | 5  | 1.176470588 | 0.0130047 | 204823_AT,: | 418 | 42  | 19113 | 5.443438141 | 0.99999998 | 0.71512501 | 19.31245 |
| GOTERM_MF_FAT   | GO:0016791~phosphatase activity                                           | 14 | 3.294117647 | 0.0130155 | 212272_AT,: | 337 | 249 | 12983 | 2.16607677  | 0.99980229 | 0.30982682 | 17.77    |
| SP_PIR_KEYWORDS | gtp-binding                                                               | 15 | 3.529411765 | 0.0130215 | 209882_AT,: | 418 | 329 | 19235 | 2.098027952 | 0.99491845 | 0.16651764 | 16.72457 |
| PIR_SUPERFAMILY | PIRSF000939:MAPK_Ptase                                                    | 3  | 0.705882353 | 0.0130491 | 208892_S_A' | 194 | 7   | 7396  | 16.33873343 | 0.94140833 | 0.61160054 | 15.35524 |
| PIR_SUPERFAMILY | PIRSF000939:dual specificity protein phosphatase (MAP kinase phosphatase) | 3  | 0.705882353 | 0.0130491 | 208892_S_A' | 194 | 7   | 7396  | 16.33873343 | 0.94140833 | 0.61160054 | 15.35524 |
| UP_SEQ_FEATURE  | nucleotide phosphate-binding region:GTP                                   | 14 | 3.294117647 | 0.0132131 | 209882_AT,: | 418 | 295 | 19113 | 2.169994323 | 0.99999998 | 0.69605103 | 19.59125 |
| GOTERM_BP_FAT   | GO:0043407~negative regulation of MAP kinase activity                     | 5  | 1.176470588 | 0.0133805 | 206374_AT,: | 350 | 36  | 13528 | 5.368253968 | 1          | 0.16569817 | 21.01028 |
| GOTERM_MF_FAT   | GO:0042803~protein homodimerization activity                              | 17 | 4           | 0.0134358 | 214985_AT,: | 337 | 334 | 12983 | 1.960864621 | 0.99985017 | 0.30713311 | 18.29148 |
| GOTERM_MF_FAT   | GO:0004860~protein kinase inhibitor activity                              | 5  | 1.176470588 | 0.0135177 | 202241_AT,: | 337 | 36  | 12983 | 5.350725354 | 0.99985805 | 0.29840669 | 18.39267 |
| GOTERM_CC_FAT   | GO:0030055~cell-substrate junction                                        | 8  | 1.882352941 | 0.0135538 | 205745_X_A' | 290 | 112 | 12782 | 3.148275862 | 0.9765478  | 0.31290253 | 16.46775 |
| INTERPRO        | IPR017442:Serine/threonine protein kinase-related                         | 17 | 4           | 0.0135563 | 201739_AT,: | 401 | 359 | 16659 | 1.967247619 | 0.99996653 | 0.45456733 | 18.77269 |
| UP_SEQ_FEATURE  | binding site:Substrate                                                    | 14 | 3.294117647 | 0.0138972 | 213700_S_A' | 418 | 297 | 19113 | 2.155381567 | 0.99999999 | 0.69108099 | 20.50022 |
| SMART           | SM00132:LIM                                                               | 7  | 1.647058824 | 0.0139617 | 215706_X_A' | 247 | 73  | 9079  | 3.524651988 | 0.90966941 | 0.45177516 | 15.77689 |
| GOTERM_BP_FAT   | GO:0051385~response to mineralocorticoid stimulus                         | 4  | 0.941176471 | 0.0140112 | 204420_AT,: | 350 | 20  | 13528 | 7.730285714 | 1          | 0.17194431 | 21.88966 |
| SP_PIR_KEYWORDS | ATP                                                                       | 12 | 2.823529412 | 0.014278  | 213198_AT,: | 418 | 236 | 19235 | 2.339834563 | 0.99695887 | 0.17566988 | 18.19277 |
| GOTERM_BP_FAT   | GO:0001932~regulation of protein amino acid phosphorylation               | 11 | 2.588235294 | 0.0143471 | 205745_X_A' | 350 | 173 | 13528 | 2.457605285 | 1          | 0.17480281 | 22.35424 |
| GOTERM_BP_FAT   | GO:0002250~adaptive immune response                                       | 7  | 1.647058824 | 0.0144258 | 209636_AT,: | 350 | 77  | 13528 | 3.513766234 | 1          | 0.17477829 | 22.46273 |
| GOTERM_BP_FAT   | GO:0002460~adaptive immune response based on somatic recombination of i   | 7  | 1.647058824 | 0.0144258 | 209636_AT,: | 350 | 77  | 13528 | 3.513766234 | 1          | 0.17477829 | 22.46273 |
| GOTERM_BP_FAT   | GO:0032496~response to lipopolysaccharide                                 | 7  | 1.647058824 | 0.0144258 | 205745_X_A' | 350 | 77  | 13528 | 3.513766234 | 1          | 0.17477829 | 22.46273 |
| GOTERM_BP_FAT   | GO:0030036~actin cytoskeleton organization                                | 13 | 3.058823529 | 0.0144695 | 202149_AT,: | 350 | 226 | 13528 | 2.223312263 | 1          | 0.17436794 | 22.52282 |
| GOTERM_BP_FAT   | GO:0051249~regulation of lymphocyte activation                            | 10 | 2.352941176 | 0.0145773 | 220049_S_A' | 350 | 148 | 13528 | 2.611583012 | 1          | 0.17466471 | 22.67106 |
| SP_PIR_KEYWORDS | charcot-marie-tooth disease                                               | 4  | 0.941176471 | 0.0146032 | 221667_S_A' | 418 | 24  | 19235 | 7.669457735 | 0.99733746 | 0.17406655 | 18.56874 |
| INTERPRO        | IPR000837:Fos transforming protein                                        | 3  | 0.705882353 | 0.0146314 | 204420_AT,: | 401 | 8   | 16659 | 15.57886534 | 0.99998531 | 0.46110853 | 20.11092 |
| GOTERM_BP_FAT   | GO:0046364~monosaccharide biosynthetic process                            | 5  | 1.176470588 | 0.0147048 | 202847_AT,: | 350 | 37  | 13528 | 5.223166023 | 1          | 0.17517326 | 22.84612 |
| GOTERM_BP_FAT   | GO:0048872~homeostasis of number of cells                                 | 8  | 1.882352941 | 0.0148036 | 203665_AT,: | 350 | 100 | 13528 | 3.092114286 | 1          | 0.17536516 | 22.98149 |
| GOTERM_MF_FAT   | GO:0019210~kinase inhibitor activity                                      | 5  | 1.176470588 | 0.0148547 | 202241_AT,: | 337 | 37  | 12983 | 5.206111156 | 0.99994129 | 0.31252451 | 20.02895 |
| INTERPRO        | IPR004841:Amino acid permease-associated region                           | 4  | 0.941176471 | 0.0150779 | 207528_S_A' | 401 | 22  | 16659 | 7.553389254 | 0.99998957 | 0.45322024 | 20.6605  |
| INTERPRO        | IPR000712:Apoptosis regulator Bcl-2, BH                                   | 4  | 0.941176471 | 0.0150779 | 206665_S_A' | 401 | 22  | 16659 | 7.553389254 | 0.99998957 | 0.45322024 | 20.6605  |
| GOTERM_BP_FAT   | GO:0051384~response to glucocorticoid stimulus                            | 7  | 1.647058824 | 0.0152997 | 204420_AT,: | 350 | 78  | 13528 | 3.468717949 | 1          | 0.17981943 | 23.65766 |



|                 |                                                                            |    |             |           |            |     |      |       |             |            |            |          |
|-----------------|----------------------------------------------------------------------------|----|-------------|-----------|------------|-----|------|-------|-------------|------------|------------|----------|
| UP_SEQ_FEATURE  | domain:PH                                                                  | 12 | 2.823529412 | 0.0153107 | 218000_S_A | 418 | 237  | 19113 | 2.315183817 | 1          | 0.70444425 | 22.34784 |
| GOTERM_MF_FAT   | GO:0032553~ribonucleotide binding                                          | 63 | 14.82352941 | 0.0155112 | 209307_AT, | 337 | 1836 | 12983 | 1.321943911 | 0.99996196 | 0.31403083 | 20.82111 |
| GOTERM_MF_FAT   | GO:0032555~purine ribonucleotide binding                                   | 63 | 14.82352941 | 0.0155112 | 209307_AT, | 337 | 1836 | 12983 | 1.321943911 | 0.99996196 | 0.31403083 | 20.82111 |
| GOTERM_MF_FAT   | GO:0010843~promoter binding                                                | 6  | 1.411764706 | 0.0157215 | 201464_X_A | 337 | 57   | 12983 | 4.055286584 | 0.9999669  | 0.30817878 | 21.07331 |
| GOTERM_BP_FAT   | GO:0040008~regulation of growth                                            | 17 | 4           | 0.0157604 | 214577_AT, | 350 | 341  | 13528 | 1.926904064 | 1          | 0.18382905 | 24.28061 |
| GOTERM_BP_FAT   | GO:0043085~positive regulation of catalytic activity                       | 23 | 5.411764706 | 0.0159519 | 212470_AT, | 350 | 520  | 13528 | 1.709582418 | 1          | 0.18494643 | 24.53807 |
| SP_PIR_KEYWORDS | ank repeat                                                                 | 12 | 2.823529412 | 0.0159907 | 209636_AT, | 418 | 240  | 19235 | 2.300837321 | 0.99849102 | 0.18372987 | 20.15522 |
| GOTERM_BP_FAT   | GO:0001701~in utero embryonic development                                  | 11 | 2.588235294 | 0.0160091 | 213198_AT, | 350 | 176  | 13528 | 2.415714286 | 1          | 0.18464553 | 24.61494 |
| GOTERM_BP_FAT   | GO:0034620~cellular response to unfolded protein                           | 4  | 0.941176471 | 0.0160397 | 209383_AT, | 350 | 21   | 13528 | 7.362176871 | 1          | 0.18406891 | 24.6559  |
| GOTERM_BP_FAT   | GO:0030968~endoplasmic reticulum unfolded protein response                 | 4  | 0.941176471 | 0.0160397 | 209383_AT, | 350 | 21   | 13528 | 7.362176871 | 1          | 0.18406891 | 24.6559  |
| GOTERM_BP_FAT   | GO:0015804~neutral amino acid transport                                    | 4  | 0.941176471 | 0.0160397 | 212810_S_A | 350 | 21   | 13528 | 7.362176871 | 1          | 0.18406891 | 24.6559  |
| GOTERM_BP_FAT   | GO:0001569~patterning of blood vessels                                     | 4  | 0.941176471 | 0.0160397 | 203935_AT, | 350 | 21   | 13528 | 7.362176871 | 1          | 0.18406891 | 24.6559  |
| GOTERM_BP_FAT   | GO:0045429~positive regulation of nitric oxide biosynthetic process        | 4  | 0.941176471 | 0.0160397 | 205580_S_A | 350 | 21   | 13528 | 7.362176871 | 1          | 0.18406891 | 24.6559  |
| GOTERM_MF_FAT   | GO:0015179~L-amino acid transmembrane transporter activity                 | 5  | 1.176470588 | 0.0162724 | 212810_S_A | 337 | 38   | 12983 | 5.069108231 | 0.99997701 | 0.30808454 | 21.73048 |
| GOTERM_BP_FAT   | GO:0042110~T cell activation                                               | 9  | 2.117647059 | 0.016371  | 205745_X_A | 350 | 126  | 13528 | 2.760816327 | 1          | 0.1866162  | 25.0989  |
| GOTERM_BP_FAT   | GO:0006563~L-serine metabolic process                                      | 3  | 0.705882353 | 0.0167655 | 201397_AT, | 350 | 8    | 13528 | 14.49428571 | 1          | 0.18977765 | 25.62312 |
| GOTERM_BP_FAT   | GO:0045737~positive regulation of cyclin-dependent protein kinase activity | 3  | 0.705882353 | 0.0167655 | 205745_X_A | 350 | 8    | 13528 | 14.49428571 | 1          | 0.18977765 | 25.62312 |
| GOTERM_MF_FAT   | GO:0030275~LRR domain binding                                              | 3  | 0.705882353 | 0.0168649 | 218364_AT, | 337 | 8    | 12983 | 14.44695846 | 0.99998447 | 0.30863596 | 22.43154 |
| GOTERM_BP_FAT   | GO:0007050~cell cycle arrest                                               | 8  | 1.882352941 | 0.0171743 | 202443_X_A | 350 | 103  | 13528 | 3.002052705 | 1          | 0.19304059 | 26.16271 |
| GOTERM_BP_FAT   | GO:0051329~interphase of mitotic cell cycle                                | 8  | 1.882352941 | 0.0171743 | 205745_X_A | 350 | 103  | 13528 | 3.002052705 | 1          | 0.19304059 | 26.16271 |
| GOTERM_BP_FAT   | GO:0007178~transmembrane receptor protein serine/threonine kinase signali  | 8  | 1.882352941 | 0.0171743 | 201464_X_A | 350 | 103  | 13528 | 3.002052705 | 1          | 0.19304059 | 26.16271 |
| GOTERM_BP_FAT   | GO:0051147~regulation of muscle cell differentiation                       | 5  | 1.176470588 | 0.0175947 | 215253_S_A | 350 | 39   | 13528 | 4.955311355 | 1          | 0.1963741  | 26.71365 |
| GOTERM_BP_FAT   | GO:0051781~positive regulation of cell division                            | 5  | 1.176470588 | 0.0175947 | 208378_X_A | 350 | 39   | 13528 | 4.955311355 | 1          | 0.1963741  | 26.71365 |
| GOTERM_BP_FAT   | GO:0051100~negative regulation of binding                                  | 6  | 1.411764706 | 0.0178236 | 209193_AT, | 350 | 59   | 13528 | 3.930653753 | 1          | 0.19774763 | 27.01208 |
| SP_PIR_KEYWORDS | manganese                                                                  | 9  | 2.117647059 | 0.0179517 | 204698_AT, | 418 | 152  | 19235 | 2.724675774 | 0.99932463 | 0.19845955 | 22.34861 |
| KEGG_PATHWAY    | hsa05222~Small cell lung cancer                                            | 8  | 1.882352941 | 0.0180326 | 206665_S_A | 165 | 84   | 5085  | 2.935064935 | 0.91427525 | 0.23887454 | 19.21169 |
| GOTERM_BP_FAT   | GO:0045682~regulation of epidermis development                             | 4  | 0.941176471 | 0.0182242 | 204970_S_A | 350 | 22   | 13528 | 7.027532468 | 1          | 0.2008101  | 27.53157 |
| GOTERM_MF_FAT   | GO:0004725~protein tyrosine phosphatase activity                           | 8  | 1.882352941 | 0.0182844 | 208892_S_A | 337 | 104  | 12983 | 2.963478658 | 0.99999394 | 0.32126541 | 24.08738 |
| INTERPRO        | IPR000072:Platelet-derived growth factor (PDGF)                            | 3  | 0.705882353 | 0.0185158 | 212171_X_A | 401 | 9    | 16659 | 13.8478803  | 0.99999926 | 0.50614935 | 24.77596 |
| INTERPRO        | IPR018459:Ril binding domain                                               | 3  | 0.705882353 | 0.0185158 | 202759_S_A | 401 | 9    | 16659 | 13.8478803  | 0.99999926 | 0.50614935 | 24.77596 |
| GOTERM_BP_FAT   | GO:0007179~transforming growth factor beta receptor signaling pathway      | 6  | 1.411764706 | 0.0190459 | 201464_X_A | 350 | 60   | 13528 | 3.865142857 | 1          | 0.20796281 | 28.58619 |
| INTERPRO        | IPR001763:Rhodanese-like                                                   | 4  | 0.941176471 | 0.0191309 | 206374_AT, | 401 | 24   | 16659 | 6.92394015  | 0.99999954 | 0.50065899 | 25.49097 |
| GOTERM_BP_FAT   | GO:0016053~organic acid biosynthetic process                               | 10 | 2.352941176 | 0.0191464 | 220346_AT, | 350 | 155  | 13528 | 2.493640553 | 1          | 0.20798974 | 28.71418 |
| GOTERM_BP_FAT   | GO:0046394~carboxylic acid biosynthetic process                            | 10 | 2.352941176 | 0.0191464 | 220346_AT, | 350 | 155  | 13528 | 2.493640553 | 1          | 0.20798974 | 28.71418 |
| GOTERM_BP_FAT   | GO:0031327~negative regulation of cellular biosynthetic process            | 24 | 5.647058824 | 0.0192585 | 213138_AT, | 350 | 561  | 13528 | 1.653537051 | 1          | 0.20812833 | 28.85661 |
| GOTERM_BP_FAT   | GO:0048584~positive regulation of response to stimulus                     | 13 | 3.058823529 | 0.0196654 | 205745_X_A | 350 | 236  | 13528 | 2.129104116 | 1          | 0.21110323 | 29.37165 |
| GOTERM_MF_FAT   | GO:0000166~nucleotide binding                                              | 74 | 17.41176471 | 0.019762  | 209307_AT, | 337 | 2245 | 12983 | 1.269873705 | 0.99999773 | 0.33372946 | 25.77602 |
| GOTERM_BP_FAT   | GO:0002696~positive regulation of leukocyte activation                     | 8  | 1.882352941 | 0.0198013 | 220049_S_A | 350 | 106  | 13528 | 2.917088949 | 1          | 0.21145274 | 29.54288 |
| GOTERM_BP_FAT   | GO:0051325~interphase                                                      | 8  | 1.882352941 | 0.0198013 | 205745_X_A | 350 | 106  | 13528 | 2.917088949 | 1          | 0.21145274 | 29.54288 |
| INTERPRO        | IPR001092:Basic helix-loop-helix dimerisation region bHLH                  | 8  | 1.882352941 | 0.0200629 | 209061_AT, | 401 | 114  | 16659 | 2.915343221 | 0.99999977 | 0.5011863  | 26.56215 |
| GOTERM_BP_FAT   | GO:0022604~regulation of cell morphogenesis                                | 9  | 2.117647059 | 0.0202151 | 214577_AT, | 350 | 131  | 13528 | 2.655441658 | 1          | 0.21443585 | 30.06182 |
| GOTERM_CC_FAT   | GO:0043233~organelle lumen                                                 | 55 | 12.94117647 | 0.0204174 | 209636_AT, | 290 | 1820 | 12782 | 1.331962865 | 0.99656209 | 0.40292788 | 23.8147  |
| SP_PIR_KEYWORDS | nadp                                                                       | 9  | 2.117647059 | 0.0206343 | 201468_S_A | 418 | 156  | 19235 | 2.654812293 | 0.99977572 | 0.21896548 | 25.25858 |
| SP_PIR_KEYWORDS | prenylation                                                                | 9  | 2.117647059 | 0.0206343 | 218360_AT, | 418 | 156  | 19235 | 2.654812293 | 0.99977572 | 0.21896548 | 25.25858 |
| SMART           | SMO0337:BCL                                                                | 4  | 0.941176471 | 0.0206854 | 206665_S_A | 247 | 22   | 9079  | 6.683106367 | 0.97196476 | 0.51073871 | 22.52827 |
| GOTERM_BP_FAT   | GO:0002684~positive regulation of immune system process                    | 13 | 3.058823529 | 0.0208475 | 220049_S_A | 350 | 238  | 13528 | 2.111212485 | 1          | 0.21943132 | 30.84798 |
| GOTERM_BP_FAT   | GO:0010608~posttranscriptional regulation of gene expression               | 12 | 2.823529412 | 0.0211648 | 212171_X_A | 350 | 211  | 13528 | 2.198185511 | 1          | 0.22142164 | 31.23925 |
| GOTERM_BP_FAT   | GO:0060325~face morphogenesis                                              | 3  | 0.705882353 | 0.0211918 | 202310_S_A | 350 | 9    | 13528 | 12.88380952 | 1          | 0.22070196 | 31.27246 |
| GOTERM_MF_FAT   | GO:0008195~phosphatidate phosphatase activity                              | 3  | 0.705882353 | 0.0213162 | 202459_S_A | 337 | 9    | 12983 | 12.84174085 | 0.99999919 | 0.34626811 | 27.51426 |
| SP_PIR_KEYWORDS | atp-binding                                                                | 41 | 9.647058824 | 0.0213725 | 206411_S_A | 418 | 1326 | 19235 | 1.422840575 | 0.9998345  | 0.22023095 | 26.04142 |
| KEGG_PATHWAY    | hsa04210:Apoptosis                                                         | 8  | 1.882352941 | 0.021479  | 206665_S_A | 165 | 87   | 5085  | 2.833855799 | 0.94667007 | 0.25407167 | 22.47402 |
| GOTERM_MF_FAT   | GO:0003924~GTPase activity                                                 | 12 | 2.823529412 | 0.0215549 | 209882_AT, | 337 | 211  | 12983 | 2.191007918 | 0.99999931 | 0.3411281  | 27.7778  |
| SP_PIR_KEYWORDS | isopeptide bond                                                            | 14 | 3.294117647 | 0.0222196 | 209636_AT, | 418 | 319  | 19235 | 2.01954373  | 0.99988325 | 0.22239876 | 26.93031 |
| GOTERM_BP_FAT   | GO:0033189~response to vitamin A                                           | 5  | 1.176470588 | 0.0225519 | 204341_AT, | 350 | 42   | 13528 | 4.601360544 | 1          | 0.23220728 | 32.9255  |
| GOTERM_BP_FAT   | GO:0030029~actin filament-based process                                    | 13 | 3.058823529 | 0.0227219 | 202149_AT, | 350 | 241  | 13528 | 2.084931832 | 1          | 0.23272061 | 33.12595 |

|                 |                                                                             |    |             |           |             |     |      |       |             |            |            |          |
|-----------------|-----------------------------------------------------------------------------|----|-------------|-----------|-------------|-----|------|-------|-------------|------------|------------|----------|
| GOTERM_BP_FAT   | GO:0002252~immune effector process                                          | 9  | 2.117647059 | 0.022808  | 205745_X_A` | 350 | 134  | 13528 | 2.595991471 | 1          | 0.23252592 | 33.23251 |
| UP_SEQ_FEATURE  | short sequence motif:BH1                                                    | 3  | 0.705882353 | 0.0229284 | 206665_S_A` | 418 | 11   | 19113 | 12.47042192 | 1          | 0.82282775 | 31.63058 |
| GOTERM_BP_FAT   | GO:0010243~response to organic nitrogen                                     | 6  | 1.411764706 | 0.0230392 | 206665_S_A` | 350 | 63   | 13528 | 3.681088435 | 1          | 0.23360779 | 33.50862 |
| GOTERM_BP_FAT   | GO:0009066~aspartate family amino acid metabolic process                    | 4  | 0.941176471 | 0.0230644 | 220346_AT,: | 350 | 24   | 13528 | 6.441904762 | 1          | 0.23284214 | 33.53864 |
| SMART           | SM00141:PDGF                                                                | 3  | 0.705882353 | 0.0232151 | 212171_X_A` | 247 | 9    | 9079  | 12.25236167 | 0.98198551 | 0.48799959 | 24.93703 |
| GOTERM_BP_FAT   | GO:0009890~negative regulation of biosynthetic process                      | 24 | 5.647058824 | 0.0240988 | 213138_AT,: | 350 | 573  | 13528 | 1.618908003 | 1          | 0.24100268 | 34.75993 |
| GOTERM_BP_FAT   | GO:0032103~positive regulation of response to external stimulus             | 6  | 1.411764706 | 0.0244817 | 205745_X_A` | 350 | 64   | 13528 | 3.623571429 | 1          | 0.24334384 | 35.20667 |
| GOTERM_BP_FAT   | GO:0048167~regulation of synaptic plasticity                                | 6  | 1.411764706 | 0.0244817 | 214577_AT,: | 350 | 64   | 13528 | 3.623571429 | 1          | 0.24334384 | 35.20667 |
| GOTERM_BP_FAT   | GO:0050804~regulation of synaptic transmission                              | 9  | 2.117647059 | 0.0246616 | 204729_S_A` | 350 | 136  | 13528 | 2.557815126 | 1          | 0.24389682 | 35.41559 |
| GOTERM_BP_FAT   | GO:0050867~positive regulation of cell activation                           | 8  | 1.882352941 | 0.0247822 | 220049_S_A` | 350 | 111  | 13528 | 2.785688546 | 1          | 0.24393222 | 35.55529 |
| UP_SEQ_FEATURE  | lipid moiety-binding region:S-farnesyl cysteine                             | 5  | 1.176470588 | 0.0249412 | 209785_S_A` | 418 | 51   | 19113 | 4.48283141  | 1          | 0.83225401 | 33.90312 |
| KEGG_PATHWAY    | hsa05020:Prion diseases                                                     | 5  | 1.176470588 | 0.0250803 | 201694_S_A` | 165 | 35   | 5085  | 4.402597403 | 0.96758135 | 0.26782024 | 25.75383 |
| UP_SEQ_FEATURE  | compositionally biased region:Ser-rich                                      | 17 | 4           | 0.0252754 | 209061_AT,: | 418 | 425  | 19113 | 1.828995215 | 1          | 0.82076526 | 34.27353 |
| GOTERM_BP_FAT   | GO:0006350~transcription                                                    | 69 | 16.23529412 | 0.0256956 | 201464_X_A` | 350 | 2101 | 13528 | 1.269371048 | 1          | 0.25075583 | 36.60389 |
| GOTERM_BP_FAT   | GO:0048705~skeletal system morphogenesis                                    | 8  | 1.882352941 | 0.0258727 | 216017_S_A` | 350 | 112  | 13528 | 2.760816327 | 1          | 0.2512387  | 36.80534 |
| GOTERM_BP_FAT   | GO:0009396~folic acid and derivative biosynthetic process                   | 3  | 0.705882353 | 0.0260435 | 201761_AT,: | 350 | 10   | 13528 | 11.59542857 | 1          | 0.25166371 | 36.99903 |
| GOTERM_BP_FAT   | GO:0045073~regulation of chemokine biosynthetic process                     | 3  | 0.705882353 | 0.0260435 | 203665_AT,: | 350 | 10   | 13528 | 11.59542857 | 1          | 0.25166371 | 36.99903 |
| SMART           | SM00450:RHOD                                                                | 4  | 0.941176471 | 0.0261336 | 206374_AT,: | 247 | 24   | 9079  | 6.126180837 | 0.98920071 | 0.47633151 | 27.63051 |
| INTERPRO        | IPR001715:Calponin-like actin-binding                                       | 6  | 1.411764706 | 0.026383  | 204823_AT,: | 401 | 70   | 16659 | 3.560883506 | 1          | 0.58425355 | 33.45526 |
| GOTERM_BP_FAT   | GO:0051241~negative regulation of multicellular organismal process          | 10 | 2.352941176 | 0.0264434 | 205745_X_A` | 350 | 164  | 13528 | 2.356794425 | 1          | 0.25400697 | 37.45044 |
| UP_SEQ_FEATURE  | site:Lowest pKa of active site Tyr                                          | 3  | 0.705882353 | 0.0271223 | 216594_X_A` | 418 | 12   | 19113 | 11.4312201  | 1          | 0.82769579 | 36.28564 |
| UP_SEQ_FEATURE  | domain:LDL-receptor class A 5                                               | 3  | 0.705882353 | 0.0271223 | 217173_S_A` | 418 | 12   | 19113 | 11.4312201  | 1          | 0.82769579 | 36.28564 |
| KEGG_PATHWAY    | hsa04630:Jak-STAT signaling pathway                                         | 11 | 2.588235294 | 0.0273298 | 209193_AT,: | 165 | 155  | 5085  | 2.187096774 | 0.97626681 | 0.26782817 | 27.37363 |
| GOTERM_BP_FAT   | GO:0019318~hexose metabolic process                                         | 11 | 2.588235294 | 0.0273783 | 213700_S_A` | 350 | 192  | 13528 | 2.214404762 | 1          | 0.26076022 | 38.49383 |
| INTERPRO        | IPR018170:Aldo/keto reductase, conserved site                               | 3  | 0.705882353 | 0.0274073 | 216594_X_A` | 401 | 11   | 16659 | 11.33008388 | 1          | 0.58281351 | 34.51374 |
| KEGG_PATHWAY    | hsa05212:Pancreatic cancer                                                  | 7  | 1.647058824 | 0.0277794 | 206665_S_A` | 165 | 72   | 5085  | 2.996212112 | 0.97770285 | 0.25365049 | 28.12825 |
| GOTERM_CC_FAT   | GO:0005856~cytoskeleton                                                     | 43 | 10.11764706 | 0.0280329 | 212810_S_A` | 290 | 1381 | 12782 | 1.37238383  | 0.99959804 | 0.47878714 | 31.2649  |
| GOTERM_BP_FAT   | GO:0043433~negative regulation of transcription factor activity             | 5  | 1.176470588 | 0.0282802 | 209193_AT,: | 350 | 45   | 13528 | 4.294603175 | 1          | 0.2671283  | 39.4848  |
| GOTERM_BP_FAT   | GO:0051353~positive regulation of oxidoreductase activity                   | 4  | 0.941176471 | 0.0285335 | 206411_S_A` | 350 | 26   | 13528 | 5.946373626 | 1          | 0.26813842 | 39.76041 |
| GOTERM_CC_FAT   | GO:0031974~membrane-enclosed lumen                                          | 55 | 12.94117647 | 0.0286095 | 209636_AT,: | 290 | 1856 | 12782 | 1.306127378 | 0.99965857 | 0.45883333 | 31.80066 |
| GOTERM_BP_FAT   | GO:0006865~amino acid transport                                             | 7  | 1.647058824 | 0.0287751 | 212810_S_A` | 350 | 90   | 13528 | 3.006222222 | 1          | 0.26904379 | 40.02217 |
| SP_PIR_KEYWORDS | transferase                                                                 | 42 | 9.882352941 | 0.0287973 | 218871_X_A` | 418 | 1394 | 19235 | 1.386444296 | 0.99999231 | 0.27258795 | 33.50257 |
| GOTERM_MF_FAT   | GO:0005516~calmodulin binding                                               | 9  | 2.117647059 | 0.0291174 | 209882_AT,: | 337 | 140  | 12983 | 2.47662145  | 1          | 0.42283387 | 35.67991 |
| INTERPRO        | IPR002110:Ankyrin                                                           | 12 | 2.823529412 | 0.0291404 | 209636_AT,: | 401 | 238  | 16659 | 2.094637356 | 1          | 0.59062246 | 36.26904 |
| SP_PIR_KEYWORDS | metal-binding                                                               | 80 | 18.82352941 | 0.0291765 | 204334_AT,: | 418 | 2972 | 19235 | 1.238674197 | 0.99999343 | 0.26950124 | 33.86413 |
| GOTERM_BP_FAT   | GO:0010740~positive regulation of protein kinase cascade                    | 10 | 2.352941176 | 0.0292618 | 203665_AT,: | 350 | 167  | 13528 | 2.314456801 | 1          | 0.2719066  | 40.54618 |
| GOTERM_BP_FAT   | GO:0005996~monosaccharide metabolic process                                 | 12 | 2.823529412 | 0.0293103 | 213700_S_A` | 350 | 222  | 13528 | 2.089266409 | 1          | 0.27124323 | 40.59819 |
| GOTERM_CC_FAT   | GO:0070013~intracellular organelle lumen                                    | 53 | 12.47058824 | 0.0293139 | 209636_AT,: | 290 | 1779 | 12782 | 1.313108876 | 0.99972031 | 0.44256918 | 32.44983 |
| SP_PIR_KEYWORDS | microtubule                                                                 | 11 | 2.588235294 | 0.0296306 | 209372_X_A` | 418 | 231  | 19235 | 2.191273639 | 0.99999456 | 0.26714706 | 34.29476 |
| GOTERM_CC_FAT   | GO:0005901~caveola                                                          | 5  | 1.176470588 | 0.0296591 | 217173_S_A` | 290 | 52   | 12782 | 4.23806366  | 0.99974638 | 0.4241901  | 32.76594 |
| BIOCARTA        | h_arenf2Pathway:Oxidative Stress Induced Gene Expression Via Nrf2           | 5  | 1.176470588 | 0.0300659 | 201464_X_A` | 94  | 19   | 1437  | 4.022956327 | 0.99678234 | 0.99678234 | 31.5281  |
| GOTERM_BP_FAT   | GO:0045860~positive regulation of protein kinase activity                   | 12 | 2.823529412 | 0.0301882 | 205745_X_A` | 350 | 223  | 13528 | 2.079897502 | 1          | 0.27715779 | 41.53185 |
| GOTERM_BP_FAT   | GO:0002274~myeloid leukocyte activation                                     | 5  | 1.176470588 | 0.0303646 | 212722_S_A` | 350 | 46   | 13528 | 4.201242236 | 1          | 0.27748636 | 41.7177  |
| UP_SEQ_FEATURE  | repeat:ANK 1                                                                | 11 | 2.588235294 | 0.0308481 | 209636_AT,: | 418 | 231  | 19113 | 2.177375256 | 1          | 0.85233226 | 40.16981 |
| UP_SEQ_FEATURE  | nucleotide phosphate-binding region:ATP                                     | 31 | 7.294117647 | 0.0310248 | 206411_S_A` | 418 | 962  | 19113 | 1.473462881 | 1          | 0.84122587 | 40.34838 |
| GOTERM_BP_FAT   | GO:0007169~transmembrane receptor protein tyrosine kinase signaling pathw   | 12 | 2.823529412 | 0.0310579 | 205745_X_A` | 350 | 224  | 13528 | 2.070612245 | 1          | 0.28184276 | 42.443   |
| SP_PIR_KEYWORDS | s-nitrosylation                                                             | 3  | 0.705882353 | 0.0312299 | 200790_AT,: | 418 | 13   | 19235 | 10.61924917 | 0.99999972 | 0.27360346 | 35.79086 |
| GOTERM_BP_FAT   | GO:0031293~membrane protein intracellular domain proteolysis                | 3  | 0.705882353 | 0.0312958 | 205745_X_A` | 350 | 11   | 13528 | 10.5412987  | 1          | 0.28262377 | 42.69001 |
| GOTERM_BP_FAT   | GO:0060324~face development                                                 | 3  | 0.705882353 | 0.0312958 | 202310_S_A` | 350 | 11   | 13528 | 10.5412987  | 1          | 0.28262377 | 42.69001 |
| GOTERM_BP_FAT   | GO:0046686~response to cadmium ion                                          | 3  | 0.705882353 | 0.0312958 | 202679_AT,: | 350 | 11   | 13528 | 10.5412987  | 1          | 0.28262377 | 42.69001 |
| GOTERM_BP_FAT   | GO:0042517~positive regulation of tyrosine phosphorylation of Stat3 protein | 3  | 0.705882353 | 0.0312958 | 205266_AT,: | 350 | 11   | 13528 | 10.5412987  | 1          | 0.28262377 | 42.69001 |
| GOTERM_MF_FAT   | GO:0019899~enzyme binding                                                   | 22 | 5.176470588 | 0.031357  | 214211_AT,: | 337 | 523  | 12983 | 1.620563855 | 1          | 0.43792473 | 37.86042 |
| GOTERM_MF_FAT   | GO:0005161~platelet-derived growth factor receptor binding                  | 3  | 0.705882353 | 0.0314765 | 212171_X_A` | 337 | 11   | 12983 | 10.50687888 | 1          | 0.4303427  | 37.97485 |
| GOTERM_MF_FAT   | GO:0048185~actinin binding                                                  | 3  | 0.705882353 | 0.0314765 | 203935_AT,: | 337 | 11   | 12983 | 10.50687888 | 1          | 0.4303427  | 37.97485 |
| SP_PIR_KEYWORDS | neuropathy                                                                  | 4  | 0.941176471 | 0.0315287 | 221667_S_A` | 418 | 32   | 19235 | 5.752093301 | 0.99999753 | 0.2701346  | 36.06687 |

|                 |                                                                                 |    |             |           |             |     |      |       |             |            |            |          |
|-----------------|---------------------------------------------------------------------------------|----|-------------|-----------|-------------|-----|------|-------|-------------|------------|------------|----------|
| UP_SEQ_FEATURE  | repeat:ANK 2                                                                    | 11 | 2.588235294 | 0.0315972 | 209636_AT,: | 418 | 232  | 19113 | 2.167990018 | 1          | 0.83414851 | 40.92346 |
| UP_SEQ_FEATURE  | short sequence motif:BH2                                                        | 3  | 0.705882353 | 0.0315981 | 206665_S_A` | 418 | 13   | 19113 | 10.55189547 | 1          | 0.8217994  | 40.92435 |
| SP_PIR_KEYWORDS | phosphotransferase                                                              | 10 | 2.352941176 | 0.0316062 | 209193_AT,: | 418 | 201  | 19235 | 2.289390369 | 0.99999761 | 0.26520566 | 36.13819 |
| GOTERM_BP_FAT   | GO:0050863~regulation of T cell activation                                      | 8  | 1.882352941 | 0.0318176 | 220049_S_A` | 350 | 117  | 13528 | 2.642832723 | 1          | 0.28557786 | 43.22802 |
| INTERPRO        | IPR011993:Pleckstrin homology-type                                              | 14 | 3.294117647 | 0.031856  | 212717_AT,: | 401 | 303  | 16659 | 1.91950816  | 1          | 0.60941229 | 38.93111 |
| INTERPRO        | IPR013322:TRAF-type                                                             | 3  | 0.705882353 | 0.0323743 | 205599_AT,: | 401 | 12   | 16659 | 10.38591022 | 1          | 0.60158395 | 39.42725 |
| INTERPRO        | IPR002475:BCL2-like apoptosis inhibitor                                         | 3  | 0.705882353 | 0.0323743 | 206665_S_A` | 401 | 12   | 16659 | 10.38591022 | 1          | 0.60158395 | 39.42725 |
| INTERPRO        | IPR006011:Syntaxin, N-terminal                                                  | 3  | 0.705882353 | 0.0323743 | 204729_S_A` | 401 | 12   | 16659 | 10.38591022 | 1          | 0.60158395 | 39.42725 |
| UP_SEQ_FEATURE  | compositionally biased region:Poly-Ser                                          | 18 | 4.235294118 | 0.032465  | 204011_AT,: | 418 | 475  | 19113 | 1.732732309 | 1          | 0.81818571 | 41.7854  |
| GOTERM_BP_FAT   | GO:0051302~regulation of cell division                                          | 5  | 1.176470588 | 0.0325373 | 208378_X_A` | 350 | 47   | 13528 | 4.111854103 | 1          | 0.29000207 | 43.96242 |
| GOTERM_BP_FAT   | GO:0031099~regeneration                                                         | 6  | 1.411764706 | 0.0325589 | 202443_X_A` | 350 | 69   | 13528 | 3.360993789 | 1          | 0.28909357 | 43.98431 |
| GOTERM_MF_FAT   | GO:0019207~kinase regulator activity                                            | 7  | 1.647058824 | 0.0334887 | 210018_X_A` | 337 | 93   | 12983 | 2.899747934 | 1          | 0.44208062 | 39.87166 |
| GOTERM_BP_FAT   | GO:0007369~gastrulation                                                         | 6  | 1.411764706 | 0.0343512 | 203935_AT,: | 350 | 70   | 13528 | 3.312979592 | 1          | 0.30145051 | 45.77373 |
| KEGG_PATHWAY    | hsa04144:Endocytosis                                                            | 12 | 2.823529412 | 0.0345406 | 217173_S_A` | 165 | 184  | 5085  | 2.009881423 | 0.99130858 | 0.287488   | 33.77439 |
| GOTERM_BP_FAT   | GO:0007173~epidermal growth factor receptor signaling pathway                   | 4  | 0.941176471 | 0.0346276 | 205745_X_A` | 350 | 28   | 13528 | 5.521632653 | 1          | 0.30239939 | 46.0449  |
| GOTERM_BP_FAT   | GO:0045740~positive regulation of DNA replication                               | 4  | 0.941176471 | 0.0346276 | 201464_X_A` | 350 | 28   | 13528 | 5.521632653 | 1          | 0.30239939 | 46.0449  |
| GOTERM_BP_FAT   | GO:0042108~positive regulation of cytokine biosynthetic process                 | 5  | 1.176470588 | 0.0347988 | 203665_AT,: | 350 | 48   | 13528 | 4.026190476 | 1          | 0.30256529 | 46.2121  |
| SMART           | SM00353:HLH                                                                     | 8  | 1.882352941 | 0.0350301 | 209061_AT,: | 247 | 114  | 9079  | 2.579444563 | 0.99775172 | 0.53336066 | 35.30313 |
| GOTERM_BP_FAT   | GO:0030182~neuron differentiation                                               | 19 | 4.470588235 | 0.0353806 | 212171_X_A` | 350 | 438  | 13528 | 1.676660144 | 1          | 0.30573034 | 46.77699 |
| GOTERM_CC_FAT   | GO:0044459~plasma membrane part                                                 | 63 | 14.82352941 | 0.0353933 | 212810_S_A` | 290 | 2203 | 12782 | 1.260453613 | 0.9999503  | 0.46170485 | 37.82022 |
| INTERPRO        | IPR001849:Pleckstrin homology                                                   | 13 | 3.058823529 | 0.0358245 | 218000_S_A` | 401 | 277  | 16659 | 1.949701558 | 1          | 0.62607904 | 42.63522 |
| GOTERM_MF_FAT   | GO:0015294~solute:cation symporter activity                                     | 7  | 1.647058824 | 0.0366081 | 212810_S_A` | 337 | 95   | 12983 | 2.838700609 | 1          | 0.46342001 | 42.70555 |
| GOTERM_BP_FAT   | GO:0051969~regulation of transmission of nerve impulse                          | 9  | 2.117647059 | 0.0367619 | 204729_S_A` | 350 | 147  | 13528 | 2.366413994 | 1          | 0.31461587 | 48.09573 |
| SP_PIR_KEYWORDS | transforming protein                                                            | 4  | 0.941176471 | 0.0368592 | 209193_AT,: | 418 | 34   | 19235 | 5.413734872 | 0.99999973 | 0.29670274 | 40.80889 |
| GOTERM_BP_FAT   | GO:0006809~nitric oxide biosynthetic process                                    | 3  | 0.705882353 | 0.0369251 | 201468_S_A` | 350 | 12   | 13528 | 9.662857143 | 1          | 0.31467095 | 48.24949 |
| GOTERM_BP_FAT   | GO:0034101~erythrocyte homeostasis                                              | 5  | 1.176470588 | 0.0371493 | 203665_AT,: | 350 | 49   | 13528 | 3.944023324 | 1          | 0.31515904 | 48.45992 |
| GOTERM_BP_FAT   | GO:0010629~negative regulation of gene expression                               | 21 | 4.941176471 | 0.0375609 | 213138_AT,: | 350 | 504  | 13528 | 1.61047619  | 1          | 0.31696974 | 48.84439 |
| GOTERM_BP_FAT   | GO:0001501~skeletal system development                                          | 15 | 3.529411765 | 0.0375995 | 214985_AT,: | 350 | 319  | 13528 | 1.817465293 | 1          | 0.31613715 | 48.88025 |
| GOTERM_BP_FAT   | GO:0033674~positive regulation of kinase activity                               | 12 | 2.823529412 | 0.0376105 | 205745_X_A` | 350 | 231  | 13528 | 2.007866419 | 1          | 0.31511751 | 48.89054 |
| GOTERM_BP_FAT   | GO:0043393~regulation of protein binding                                        | 4  | 0.941176471 | 0.0379065 | 215199_AT,: | 350 | 29   | 13528 | 5.331231523 | 1          | 0.31609867 | 49.16502 |
| GOTERM_BP_FAT   | GO:0055082~cellular chemical homeostasis                                        | 17 | 4           | 0.0380163 | 201464_X_A` | 350 | 380  | 13528 | 1.729142857 | 1          | 0.31577531 | 49.26646 |
| KEGG_PATHWAY    | hsa05221:Acute myeloid leukemia                                                 | 6  | 1.411764706 | 0.0380682 | 209193_AT,: | 165 | 58   | 5085  | 3.188087774 | 0.99469751 | 0.29482212 | 36.55627 |
| GOTERM_MF_FAT   | GO:0016831~carboxy-lyase activity                                               | 4  | 0.941176471 | 0.0382013 | 200790_AT,: | 337 | 29   | 12983 | 5.3138238   | 1          | 0.46948791 | 44.10435 |
| GOTERM_MF_FAT   | GO:0043498~cell surface binding                                                 | 4  | 0.941176471 | 0.0382013 | 212171_X_A` | 337 | 29   | 12983 | 5.3138238   | 1          | 0.46948791 | 44.10435 |
| GOTERM_MF_FAT   | GO:0008092~cytoskeletal protein binding                                         | 21 | 4.941176471 | 0.0385185 | 200906_S_A` | 337 | 504  | 12983 | 1.605217606 | 1          | 0.4640366  | 44.37905 |
| SP_PIR_KEYWORDS | serine/threonine-protein kinase                                                 | 15 | 3.529411765 | 0.0394297 | 201739_AT,: | 418 | 381  | 19235 | 1.81168293  | 0.99999991 | 0.3081964  | 42.97695 |
| GOTERM_BP_FAT   | GO:0010605~negative regulation of macromolecule metabolic process               | 28 | 6.588235294 | 0.0395936 | 201464_X_A` | 350 | 734  | 13528 | 1.474441417 | 1          | 0.32557032 | 50.70338 |
| GOTERM_BP_FAT   | GO:0006351~transcription, DNA-dependent                                         | 14 | 3.294117647 | 0.0401628 | 205193_AT,: | 350 | 292  | 13528 | 1.853150685 | 1          | 0.32834453 | 51.21243 |
| UP_SEQ_FEATURE  | domain:Death                                                                    | 4  | 0.941176471 | 0.0403207 | 209636_AT,: | 418 | 35   | 19113 | 5.225700615 | 1          | 0.87089559 | 49.06788 |
| SMART           | SM00503:SynN                                                                    | 3  | 0.705882353 | 0.0403529 | 204729_S_A` | 247 | 12   | 9079  | 9.189271255 | 0.99912688 | 0.5427861  | 39.52891 |
| SMART           | SM00033:CH                                                                      | 6  | 1.411764706 | 0.0408366 | 204823_AT,: | 247 | 70   | 9079  | 3.150607287 | 0.999199   | 0.50981114 | 39.90006 |
| GOTERM_BP_FAT   | GO:0007566~embryo implantation                                                  | 4  | 0.941176471 | 0.041338  | 205266_AT,: | 350 | 30   | 13528 | 5.15352381  | 1          | 0.3351613  | 52.24773 |
| GOTERM_BP_FAT   | GO:0055088~lipid homeostasis                                                    | 5  | 1.176470588 | 0.0421179 | 216594_X_A` | 350 | 51   | 13528 | 3.789355742 | 1          | 0.33924283 | 52.9234  |
| GOTERM_BP_FAT   | GO:0043392~negative regulation of DNA binding                                   | 5  | 1.176470588 | 0.0421179 | 209193_AT,: | 350 | 51   | 13528 | 3.789355742 | 1          | 0.33924283 | 52.9234  |
| GOTERM_MF_FAT   | GO:0031072~heat shock protein binding                                           | 6  | 1.411764706 | 0.0425844 | 202843_AT,: | 337 | 74   | 12983 | 3.123666693 | 1          | 0.49060179 | 47.79008 |
| GOTERM_MF_FAT   | GO:0004672~protein kinase activity                                              | 24 | 5.647058824 | 0.0428168 | 206411_S_A` | 337 | 606  | 12983 | 1.525751388 | 1          | 0.48444593 | 47.97898 |
| SP_PIR_KEYWORDS | Cysteine biosynthesis                                                           | 2  | 0.470588235 | 0.0428896 | 206085_S_A` | 418 | 2    | 19235 | 46.01674641 | 0.99999998 | 0.32468787 | 45.77884 |
| GOTERM_BP_FAT   | GO:0046209~nitric oxide metabolic process                                       | 3  | 0.705882353 | 0.0429085 | 201468_S_A` | 350 | 13   | 13528 | 8.91956044  | 1          | 0.34334034 | 53.59909 |
| UP_SEQ_FEATURE  | site:Cleavage (when cotranslationally processed)                                | 2  | 0.470588235 | 0.0431603 | 209636_AT,: | 418 | 2    | 19113 | 45.72488038 | 1          | 0.87950623 | 51.48296 |
| UP_SEQ_FEATURE  | short sequence motif:Kinase activation loop                                     | 2  | 0.470588235 | 0.0431603 | 206411_S_A` | 418 | 2    | 19113 | 45.72488038 | 1          | 0.87950623 | 51.48296 |
| UP_SEQ_FEATURE  | region of interest:GRR                                                          | 2  | 0.470588235 | 0.0431603 | 209636_AT,: | 418 | 2    | 19113 | 45.72488038 | 1          | 0.87950623 | 51.48296 |
| UP_SEQ_FEATURE  | short sequence motif:TRAF6-binding                                              | 2  | 0.470588235 | 0.0431603 | 213112_S_A` | 418 | 2    | 19113 | 45.72488038 | 1          | 0.87950623 | 51.48296 |
| UP_SEQ_FEATURE  | region of interest:CAP                                                          | 2  | 0.470588235 | 0.0431603 | 206411_S_A` | 418 | 2    | 19113 | 45.72488038 | 1          | 0.87950623 | 51.48296 |
| GOTERM_BP_FAT   | GO:0045892~negative regulation of transcription, DNA-dependent                  | 16 | 3.764705882 | 0.0434306 | 213138_AT,: | 350 | 356  | 13528 | 1.737142857 | 1          | 0.34563086 | 54.04022 |
| GOTERM_BP_FAT   | GO:0000122~negative regulation of transcription from RNA polymerase II promoter | 13 | 3.058823529 | 0.0435222 | 203957_AT,: | 350 | 266  | 13528 | 1.888979592 | 1          | 0.34509882 | 54.11724 |

|                 |                                                                      |    |             |           |             |     |     |       |             |            |            |          |
|-----------------|----------------------------------------------------------------------|----|-------------|-----------|-------------|-----|-----|-------|-------------|------------|------------|----------|
| GOTERM_BP_FAT   | GO:0032774~RNA biosynthetic process                                  | 14 | 3.294117647 | 0.0437154 | 205193_AT,: | 350 | 296 | 13528 | 1.828108108 | 1          | 0.34522969 | 54.27921 |
| GOTERM_CC_FAT   | GO:0044421~extracellular region part                                 | 31 | 7.294117647 | 0.043746  | 212171_X_A` | 290 | 960 | 12782 | 1.423283046 | 0.99999545 | 0.51499736 | 44.55696 |
| GOTERM_BP_FAT   | GO:0030522~intracellular receptor-mediated signaling pathway         | 6  | 1.411764706 | 0.04422   | 214508_X_A` | 350 | 75  | 13528 | 3.092114286 | 1          | 0.34736919 | 54.69979 |
| GOTERM_CC_FAT   | GO:0005730~nucleolus                                                 | 24 | 5.647058824 | 0.0447717 | 218000_S_A` | 290 | 698 | 12782 | 1.515502421 | 0.99999662 | 0.50331419 | 45.33603 |
| GOTERM_BP_FAT   | GO:0031644~regulation of neurological system process                 | 9  | 2.117647059 | 0.0448077 | 204729_S_A` | 350 | 153 | 13528 | 2.273613445 | 1          | 0.35001784 | 55.18504 |
| GOTERM_BP_FAT   | GO:0019319~hexose biosynthetic process                               | 4  | 0.941176471 | 0.0449203 | 202847_AT,: | 350 | 31  | 13528 | 4.987281106 | 1          | 0.34961449 | 55.27739 |
| GOTERM_BP_FAT   | GO:0010558~negative regulation of macromolecule biosynthetic process | 22 | 5.176470588 | 0.0451738 | 213138_AT,: | 350 | 547 | 13528 | 1.554536432 | 1          | 0.35010957 | 55.48482 |
| KEGG_PATHWAY    | hsa04722:Neurotrophin signaling pathway                              | 9  | 2.117647059 | 0.0460331 | 201464_X_A` | 165 | 124 | 5085  | 2.236803519 | 0.99827417 | 0.32808804 | 42.44877 |
| GOTERM_BP_FAT   | GO:0050870~positive regulation of T cell activation                  | 6  | 1.411764706 | 0.0463773 | 220049_S_A` | 350 | 76  | 13528 | 3.051428571 | 1          | 0.35657634 | 56.45696 |
| UP_SEQ_FEATURE  | domain:LDL-receptor class A 4                                        | 3  | 0.705882353 | 0.0465766 | 217173_S_A` | 418 | 16  | 19113 | 8.573415072 | 1          | 0.89017047 | 54.2459  |
| SP_PIR_KEYWORDS | calmodulin-binding                                                   | 7  | 1.647058824 | 0.0466726 | 207000_S_A` | 418 | 120 | 19235 | 2.684310207 | 1          | 0.34212651 | 48.69589 |
| SP_PIR_KEYWORDS | host-virus interaction                                               | 12 | 2.823529412 | 0.0469101 | 217173_S_A` | 418 | 285 | 19235 | 1.937547217 | 1          | 0.33765545 | 48.87405 |
| GOTERM_MF_FAT   | GO:0030145~manganese ion binding                                     | 9  | 2.117647059 | 0.0469219 | 204698_AT,: | 337 | 154 | 12983 | 2.251474045 | 1          | 0.50886975 | 51.21308 |
| GOTERM_BP_FAT   | GO:0051347~positive regulation of transferase activity               | 12 | 2.823529412 | 0.0471348 | 205745_X_A` | 350 | 240 | 13528 | 1.932571429 | 1          | 0.36017391 | 57.05859 |
| GOTERM_CC_FAT   | GO:0005874~microtubule                                               | 12 | 2.823529412 | 0.0472327 | 204011_AT,: | 290 | 274 | 12782 | 1.930329726 | 0.99999834 | 0.50356512 | 47.1641  |
| INTERPRO        | IPR004978:Stanniocalcin                                              | 2  | 0.470588235 | 0.047447  | 203439_S_A` | 401 | 2   | 16659 | 41.5436409  | 1          | 0.7179083  | 52.31155 |
| INTERPRO        | IPR015015:F-actin binding                                            | 2  | 0.470588235 | 0.047447  | 206411_S_A` | 401 | 2   | 16659 | 41.5436409  | 1          | 0.7179083  | 52.31155 |
| INTERPRO        | IPR005874:Eukaryotic translation initiation factor SUI1              | 2  | 0.470588235 | 0.047447  | 212227_X_A` | 401 | 2   | 16659 | 41.5436409  | 1          | 0.7179083  | 52.31155 |
| INTERPRO        | IPR002945:Glucose transporter, type 3 (GLUT3)                        | 2  | 0.470588235 | 0.047447  | 216236_S_A` | 401 | 2   | 16659 | 41.5436409  | 1          | 0.7179083  | 52.31155 |
| INTERPRO        | IPR001204:Phosphate transporter                                      | 2  | 0.470588235 | 0.047447  | 201920_AT,: | 401 | 2   | 16659 | 41.5436409  | 1          | 0.7179083  | 52.31155 |
| INTERPRO        | IPR008271:Serine/threonine protein kinase, active site               | 15 | 3.529411765 | 0.0477311 | 201739_AT,: | 401 | 354 | 16659 | 1.760323767 | 1          | 0.70795474 | 52.52777 |
| GOTERM_BP_FAT   | GO:0051253~negative regulation of RNA metabolic process              | 16 | 3.764705882 | 0.0479097 | 213138_AT,: | 350 | 362 | 13528 | 1.708350434 | 1          | 0.36383453 | 57.66598 |
| GOTERM_BP_FAT   | GO:0051726~regulation of cell cycle                                  | 15 | 3.529411765 | 0.0480033 | 201464_X_A` | 350 | 331 | 13528 | 1.751575313 | 1          | 0.3632797  | 57.38877 |
| GOTERM_BP_FAT   | GO:0043009~chordate embryonic development                            | 15 | 3.529411765 | 0.0480033 | 213198_AT,: | 350 | 331 | 13528 | 1.751575313 | 1          | 0.3632797  | 57.38877 |
| INTERPRO        | IPR002290:Serine/threonine protein kinase                            | 12 | 2.823529412 | 0.0488114 | 201739_AT,: | 401 | 259 | 16659 | 1.924801895 | 1          | 0.70441177 | 53.3416  |
| INTERPRO        | IPR011600:Peptidase C14, caspase catalytic                           | 3  | 0.705882353 | 0.049135  | 210018_X_A` | 401 | 15  | 16659 | 8.30872818  | 1          | 0.6953917  | 53.58281 |
| INTERPRO        | IPR001309:Peptidase C14, ICE, catalytic subunit p20                  | 3  | 0.705882353 | 0.049135  | 210018_X_A` | 401 | 15  | 16659 | 8.30872818  | 1          | 0.6953917  | 53.58281 |
| GOTERM_BP_FAT   | GO:0045604~regulation of epidermal cell differentiation              | 3  | 0.705882353 | 0.0492241 | 204970_S_A` | 350 | 14  | 13528 | 8.28244898  | 1          | 0.36959369 | 58.67766 |
| GOTERM_CC_FAT   | GO:0005667~transcription factor complex                              | 10 | 2.352941176 | 0.0493121 | 201464_X_A` | 290 | 210 | 12782 | 2.098850575 | 0.99999909 | 0.50108995 | 48.66451 |
| SP_PIR_KEYWORDS | zinc finger                                                          | 8  | 1.882352941 | 0.0494182 | 210426_X_A` | 418 | 153 | 19235 | 2.406104388 | 1          | 0.34656345 | 50.72095 |
| KEGG_PATHWAY    | hsa00450:Selenoamino acid metabolism                                 | 4  | 0.941176471 | 0.0497517 | 201475_X_A` | 165 | 26  | 5085  | 4.741258741 | 0.99898139 | 0.3331925  | 45.02457 |
| SP_PIR_KEYWORDS | alternative initiation                                               | 5  | 1.176470588 | 0.050058  | 209193_AT,: | 418 | 64  | 19235 | 3.595058313 | 1          | 0.34450403 | 51.18204 |
| GOTERM_BP_FAT   | GO:0000079~regulation of cyclin-dependent protein kinase activity    | 5  | 1.176470588 | 0.05024   | 205745_X_A` | 350 | 54  | 13528 | 3.578835979 | 1          | 0.37457834 | 59.44391 |
| GOTERM_BP_FAT   | GO:0008629~induction of apoptosis by intracellular signals           | 5  | 1.176470588 | 0.05024   | 203665_AT,: | 350 | 54  | 13528 | 3.578835979 | 1          | 0.37457834 | 59.44391 |
| GOTERM_CC_FAT   | GO:0012505~endomembrane system                                       | 26 | 6.117647059 | 0.0503704 | 218871_X_A` | 290 | 782 | 12782 | 1.465437869 | 0.99999933 | 0.4917613  | 49.41292 |
| GOTERM_MF_FAT   | GO:0030170~pyridoxal phosphate binding                               | 5  | 1.176470588 | 0.0507054 | 212322_AT,: | 337 | 54  | 12983 | 3.567150236 | 1          | 0.52894898 | 54.02678 |
| GOTERM_MF_FAT   | GO:0070279~vitamin B6 binding                                        | 5  | 1.176470588 | 0.0507054 | 212322_AT,: | 337 | 54  | 12983 | 3.567150236 | 1          | 0.52894898 | 54.02678 |
| OMIM_DISEASE    | Leukemia, acute myeloid                                              | 3  | 0.705882353 | 0.0507445 | 219492_AT,: | 91  | 15  | 3671  | 8.068131868 | 0.99990577 | 0.99990577 | 47.28469 |
| GOTERM_BP_FAT   | GO:0019344~cysteine biosynthetic process                             | 2  | 0.470588235 | 0.050933  | 206085_S_A` | 350 | 2   | 13528 | 38.65142857 | 1          | 0.37757368 | 59.95888 |
| GOTERM_BP_FAT   | GO:0070814~hydrogen sulfide biosynthetic process                     | 2  | 0.470588235 | 0.050933  | 206085_S_A` | 350 | 2   | 13528 | 38.65142857 | 1          | 0.37757368 | 59.95888 |
| GOTERM_BP_FAT   | GO:0070813~hydrogen sulfide metabolic process                        | 2  | 0.470588235 | 0.050933  | 206085_S_A` | 350 | 2   | 13528 | 38.65142857 | 1          | 0.37757368 | 59.95888 |
| GOTERM_BP_FAT   | GO:0031915~positive regulation of synaptic plasticity                | 2  | 0.470588235 | 0.050933  | 214577_AT,: | 350 | 2   | 13528 | 38.65142857 | 1          | 0.37757368 | 59.95888 |
| GOTERM_MF_FAT   | GO:0004487~methylenetetrahydrofolate dehydrogenase (NAD+) activity   | 2  | 0.470588235 | 0.0510922 | 201761_AT,: | 337 | 2   | 12983 | 38.52322255 | 1          | 0.52393027 | 54.30571 |
| GOTERM_BP_FAT   | GO:0009792~embryonic development ending in birth or egg hatching     | 15 | 3.529411765 | 0.0513829 | 213198_AT,: | 350 | 334 | 13528 | 1.735842601 | 1          | 0.37909893 | 60.28993 |
| SP_PIR_KEYWORDS | one-carbon metabolism                                                | 3  | 0.705882353 | 0.0514541 | 201761_AT,: | 418 | 17  | 19235 | 8.120602308 | 1          | 0.34673372 | 52.17439 |
| PIR_SUPERFAMILY | PIRSF004499:translation initiation factor 1, eukaryotic type         | 2  | 0.470588235 | 0.0515129 | 212227_X_A` | 194 | 2   | 7396  | 38.12371134 | 0.99998907 | 0.94249596 | 48.89213 |
| PIR_SUPERFAMILY | PIRSF006633:tyrosine-protein kinase, ABL type                        | 2  | 0.470588235 | 0.0515129 | 206411_S_A` | 194 | 2   | 7396  | 38.12371134 | 0.99998907 | 0.94249596 | 48.89213 |
| PIR_SUPERFAMILY | PIRSF036310:transcription factor NF-kappa-B2                         | 2  | 0.470588235 | 0.0515129 | 209636_AT,: | 194 | 2   | 7396  | 38.12371134 | 0.99998907 | 0.94249596 | 48.89213 |
| PIR_SUPERFAMILY | PIRSF004499:SUI1_euk                                                 | 2  | 0.470588235 | 0.0515129 | 212227_X_A` | 194 | 2   | 7396  | 38.12371134 | 0.99998907 | 0.94249596 | 48.89213 |
| INTERPRO        | IPR011598:Helix-loop-helix DNA-binding                               | 6  | 1.411764706 | 0.0515277 | 206649_S_A` | 401 | 84  | 16659 | 2.967402921 | 1          | 0.70190703 | 55.33056 |
| UP_SEQ_FEATURE  | short sequence motif:BH3                                             | 3  | 0.705882353 | 0.0520422 | 206665_S_A` | 418 | 17  | 19113 | 8.069096538 | 1          | 0.90860532 | 58.36109 |
| SP_PIR_KEYWORDS | heparin-binding                                                      | 5  | 1.176470588 | 0.0524666 | 212171_X_A` | 418 | 65  | 19235 | 3.539749724 | 1          | 0.34679279 | 52.88228 |
| GOTERM_BP_FAT   | GO:0032526~response to retinoic acid                                 | 4  | 0.941176471 | 0.0525294 | 204341_AT,: | 350 | 33  | 13528 | 4.685021645 | 1          | 0.3846934  | 61.1219  |
| GOTERM_BP_FAT   | GO:0001709~cell fate determination                                   | 4  | 0.941176471 | 0.0525294 | 214056_AT,: | 350 | 33  | 13528 | 4.685021645 | 1          | 0.3846934  | 61.1219  |
| UP_SEQ_FEATURE  | active site:Proton acceptor                                          | 22 | 5.176470588 | 0.0525851 | 201739_AT,: | 418 | 658 | 19113 | 1.528795393 | 1          | 0.90369213 | 58.75027 |

|                 |                                                                    |     |             |           |             |     |       |       |             |            |            |          |
|-----------------|--------------------------------------------------------------------|-----|-------------|-----------|-------------|-----|-------|-------|-------------|------------|------------|----------|
| GOTERM_MF_FAT   | GO:0003702~RNA polymerase II transcription factor activity         | 12  | 2.823529412 | 0.0528852 | 201464_X_A` | 337 | 244   | 12983 | 1.894683076 | 1          | 0.52885832 | 55.57829 |
| GOTERM_BP_FAT   | GO:0017038~protein import                                          | 8   | 1.882352941 | 0.0531097 | 201464_X_A` | 350 | 131   | 13528 | 2.360392585 | 1          | 0.38692413 | 61.53669 |
| GOTERM_BP_FAT   | GO:0050671~positive regulation of lymphocyte proliferation         | 5   | 1.176470588 | 0.0531251 | 220049_S_A` | 350 | 55    | 13528 | 3.513766234 | 1          | 0.38586738 | 61.54764 |
| SMART           | SM00808:FABD                                                       | 2   | 0.470588235 | 0.0534597 | 206411_S_A` | 247 | 2     | 9079  | 36.75708502 | 0.99991686 | 0.5743316  | 48.87742 |
| GOTERM_MF_FAT   | GO:0001882~nucleoside binding                                      | 53  | 12.47058824 | 0.0537108 | 209307_AT,` | 337 | 1612  | 12983 | 1.266648136 | 1          | 0.52704079 | 56.15314 |
| GOTERM_BP_FAT   | GO:0043627~response to estrogen stimulus                           | 7   | 1.647058824 | 0.0543086 | 217173_S_A` | 350 | 105   | 13528 | 2.576761905 | 1          | 0.39153638 | 62.38048 |
| GOTERM_MF_FAT   | GO:0019838~growth factor binding                                   | 7   | 1.647058824 | 0.0549558 | 205798_AT,` | 337 | 105   | 12983 | 2.56834817  | 1          | 0.52808494 | 57.00678 |
| GOTERM_MF_FAT   | GO:0004674~protein serine/threonine kinase activity                | 18  | 4.235294118 | 0.0550247 | 201739_AT,` | 337 | 430   | 12983 | 1.612683735 | 1          | 0.52139832 | 57.05358 |
| SP_PIR_KEYWORDS | golgi apparatus                                                    | 20  | 4.705882353 | 0.055419  | 218871_X_A` | 418 | 588   | 19235 | 1.565195456 | 1          | 0.35715875 | 54.89141 |
| GOTERM_BP_FAT   | GO:0045927~positive regulation of growth                           | 6   | 1.411764706 | 0.0556232 | 205745_X_A` | 350 | 80    | 13528 | 2.898857143 | 1          | 0.39786074 | 63.28567 |
| GOTERM_BP_FAT   | GO:0009067~aspartate family amino acid biosynthetic process        | 3   | 0.705882353 | 0.0558509 | 220346_AT,` | 350 | 15    | 13528 | 7.730285714 | 1          | 0.39799012 | 63.44033 |
| GOTERM_BP_FAT   | GO:0051054~positive regulation of DNA metabolic process            | 5   | 1.176470588 | 0.0560985 | 201464_X_A` | 350 | 56    | 13528 | 3.451020408 | 1          | 0.39823047 | 63.60782 |
| GOTERM_BP_FAT   | GO:0070665~positive regulation of leukocyte proliferation          | 5   | 1.176470588 | 0.0560985 | 220049_S_A` | 350 | 56    | 13528 | 3.451020408 | 1          | 0.39823047 | 63.60782 |
| GOTERM_BP_FAT   | GO:0032946~positive regulation of mononuclear cell proliferation   | 5   | 1.176470588 | 0.0560985 | 220049_S_A` | 350 | 56    | 13528 | 3.451020408 | 1          | 0.39823047 | 63.60782 |
| GOTERM_MF_FAT   | GO:0030228~lipoprotein receptor activity                           | 3   | 0.705882353 | 0.0561623 | 217173_S_A` | 337 | 15    | 12983 | 7.70504451  | 1          | 0.52184176 | 57.81922 |
| GOTERM_MF_FAT   | GO:0042301~phosphate binding                                       | 3   | 0.705882353 | 0.0561623 | 201761_AT,` | 337 | 15    | 12983 | 7.70504451  | 1          | 0.52184176 | 57.81922 |
| GOTERM_BP_FAT   | GO:0000060~protein import into nucleus, translocation              | 4   | 0.941176471 | 0.0565517 | 201464_X_A` | 350 | 34    | 13528 | 4.547226891 | 1          | 0.39961706 | 63.91255 |
| GOTERM_BP_FAT   | GO:0006470~protein amino acid dephosphorylation                    | 8   | 1.882352941 | 0.0567373 | 208892_S_A` | 350 | 133   | 13528 | 2.324897959 | 1          | 0.39950562 | 64.03666 |
| GOTERM_CC_FAT   | GO:0031410~cytoplasmic vesicle                                     | 5   | 1.176470588 | 0.0572861 | 218000_S_A` | 290 | 642   | 12782 | 1.510387797 | 0.99999991 | 0.52164638 | 54.06073 |
| UP_SEQ_FEATURE  | domain:LIM zinc-binding                                            | 3   | 0.705882353 | 0.0577232 | 55081_AT,`  | 418 | 18    | 19113 | 7.620813397 | 1          | 0.91752866 | 62.26844 |
| GOTERM_BP_FAT   | GO:0044057~regulation of system process                            | 14  | 3.294117647 | 0.0579109 | 204729_S_A` | 350 | 309   | 13528 | 1.751197411 | 1          | 0.40484607 | 64.81203 |
| GOTERM_BP_FAT   | GO:0043122~regulation of I-kappaB kinase/NF-kappaB cascade         | 7   | 1.647058824 | 0.0584964 | 203665_AT,` | 350 | 107   | 13528 | 2.528598131 | 1          | 0.40690569 | 65.19301 |
| GOTERM_BP_FAT   | GO:0010627~regulation of protein kinase cascade                    | 12  | 2.823529412 | 0.0585313 | 203665_AT,` | 350 | 249   | 13528 | 1.862719449 | 1          | 0.4059511  | 65.21555 |
| SMART           | SM00248:ANK                                                        | 12  | 2.823529412 | 0.0586387 | 209636_AT,` | 247 | 238   | 9079  | 1.853298404 | 0.99996747 | 0.57730406 | 52.19042 |
| GOTERM_MF_FAT   | GO:0019887~protein kinase regulator activity                       | 6   | 1.411764706 | 0.0587016 | 202241_AT,` | 337 | 81    | 12983 | 2.853720189 | 1          | 0.53109377 | 59.48261 |
| GOTERM_MF_FAT   | GO:0005525~GTP binding                                             | 16  | 3.764705882 | 0.0609911 | 213923_AT,` | 337 | 372   | 12983 | 1.656998819 | 1          | 0.53836213 | 60.92966 |
| GOTERM_BP_FAT   | GO:0006873~cellular ion homeostasis                                | 16  | 3.764705882 | 0.0609923 | 201464_X_A` | 350 | 374   | 13528 | 1.653537051 | 1          | 0.41806498 | 66.77363 |
| INTERPRO        | IPR006012:Syntaxin/epimorphin, conserved site                      | 3   | 0.705882353 | 0.0616846 | 204729_S_A` | 401 | 17    | 16659 | 7.331230747 | 1          | 0.75678989 | 62.08747 |
| SP_PIR_KEYWORDS | zinc                                                               | 59  | 13.88235294 | 0.0618353 | 221841_S_A` | 418 | 2189  | 19235 | 1.240286906 | 1          | 0.38451632 | 58.9865  |
| GOTERM_CC_FAT   | GO:0005912~adherens junction                                       | 8   | 1.882352941 | 0.0622659 | 205745_X_A` | 290 | 155   | 12782 | 2.274883204 | 0.99999998 | 0.53637135 | 57.15954 |
| GOTERM_BP_FAT   | GO:0030518~steroid hormone receptor signaling pathway              | 5   | 1.176470588 | 0.0623083 | 209061_AT,` | 350 | 58    | 13528 | 3.332019704 | 1          | 0.42387731 | 67.57958 |
| GOTERM_BP_FAT   | GO:0006760~folic acid and derivative metabolic process             | 3   | 0.705882353 | 0.0627687 | 201761_AT,` | 350 | 16    | 13528 | 7.247142857 | 1          | 0.42513288 | 67.85716 |
| GOTERM_BP_FAT   | GO:0046579~positive regulation of Ras protein signal transduction  | 3   | 0.705882353 | 0.0627687 | 202443_X_A` | 350 | 16    | 13528 | 7.247142857 | 1          | 0.42513288 | 67.85716 |
| SP_PIR_KEYWORDS | polymorphism                                                       | 267 | 62.82352941 | 0.0628089 | 201464_X_A` | 418 | 11550 | 19235 | 1.063763748 | 1          | 0.3837533  | 59.57684 |
| GOTERM_BP_FAT   | GO:0009615~response to virus                                       | 7   | 1.647058824 | 0.0628724 | 204698_AT,` | 350 | 109   | 13528 | 2.482201835 | 1          | 0.42451635 | 67.91935 |
| SP_PIR_KEYWORDS | placenta                                                           | 3   | 0.705882353 | 0.0629    | 202464_S_A` | 418 | 19    | 19235 | 7.265802065 | 1          | 0.37874779 | 59.63166 |
| UP_SEQ_FEATURE  | repeat:ANK 3                                                       | 9   | 2.117647059 | 0.0630854 | 212373_AT,` | 418 | 194   | 19113 | 2.121257337 | 1          | 0.92948599 | 65.6383  |
| GOTERM_BP_FAT   | GO:0050670~regulation of lymphocyte proliferation                  | 6   | 1.411764706 | 0.0632063 | 220049_S_A` | 350 | 83    | 13528 | 2.794079174 | 1          | 0.42510298 | 68.11892 |
| SP_PIR_KEYWORDS | Serine biosynthesis                                                | 2   | 0.470588235 | 0.0636412 | 201397_AT,` | 418 | 3     | 19235 | 30.67783094 | 1          | 0.37700194 | 60.07521 |
| KEGG_PATHWAY    | hsa04710:Circadian rhythm                                          | 3   | 0.705882353 | 0.0638828 | 209674_AT,` | 165 | 13    | 5085  | 7.111888112 | 0.99986523 | 0.39049577 | 53.88056 |
| PIR_SUPERFAMILY | PIRSF037165:ras protein                                            | 3   | 0.705882353 | 0.063967  | 213923_AT,` | 194 | 16    | 7396  | 7.148195876 | 0.99999937 | 0.94248545 | 56.78514 |
| UP_SEQ_FEATURE  | binding site:Pyridoxal phosphate                                   | 2   | 0.470588235 | 0.0640385 | 220892_S_A` | 418 | 3     | 19113 | 30.48325359 | 1          | 0.92676968 | 66.20682 |
| UP_SEQ_FEATURE  | region of interest:N-LIP                                           | 2   | 0.470588235 | 0.0640385 | 202459_S_A` | 418 | 3     | 19113 | 30.48325359 | 1          | 0.92676968 | 66.20682 |
| UP_SEQ_FEATURE  | region of interest:Clustered O-linked oligosaccharides             | 2   | 0.470588235 | 0.0640385 | 217173_S_A` | 418 | 3     | 19113 | 30.48325359 | 1          | 0.92676968 | 66.20682 |
| UP_SEQ_FEATURE  | region of interest:C-LIP                                           | 2   | 0.470588235 | 0.0640385 | 202459_S_A` | 418 | 3     | 19113 | 30.48325359 | 1          | 0.92676968 | 66.20682 |
| UP_SEQ_FEATURE  | region of interest:Pyridoxal phosphate binding                     | 2   | 0.470588235 | 0.0640385 | 220892_S_A` | 418 | 3     | 19113 | 30.48325359 | 1          | 0.92676968 | 66.20682 |
| UP_SEQ_FEATURE  | short sequence motif:DXDXT motif                                   | 2   | 0.470588235 | 0.0640385 | 202459_S_A` | 418 | 3     | 19113 | 30.48325359 | 1          | 0.92676968 | 66.20682 |
| GOTERM_BP_FAT   | GO:0006796~phosphate metabolic process                             | 34  | 8           | 0.0642688 | 212470_AT,` | 350 | 973   | 13528 | 1.350615181 | 1          | 0.42944902 | 68.74613 |
| GOTERM_BP_FAT   | GO:0006793~phosphorus metabolic process                            | 34  | 8           | 0.0642688 | 212470_AT,` | 350 | 973   | 13528 | 1.350615181 | 1          | 0.42944902 | 68.74613 |
| BIOCARTA        | h_nthiPathway:NFKB activation by Nontypeable Hemophilus influenzae | 5   | 1.176470588 | 0.0644133 | 209878_S_A` | 94  | 24    | 1437  | 3.184840426 | 0.99999634 | 0.99808619 | 56.22332 |
| BIOCARTA        | h_p53hypoxiaPathway:Hypoxia and p53 in the Cardiovascular system   | 5   | 1.176470588 | 0.0644133 | 201468_S_A` | 94  | 24    | 1437  | 3.184840426 | 0.99999634 | 0.99808619 | 56.22332 |
| GOTERM_BP_FAT   | GO:0006417~regulation of translation                               | 8   | 1.882352941 | 0.0644442 | 205207_AT,` | 350 | 137   | 13528 | 2.257017727 | 1          | 0.42919717 | 68.84849 |
| GOTERM_CC_FAT   | GO:0005884~actin filament                                          | 4   | 0.941176471 | 0.0649783 | 200906_S_A` | 290 | 41    | 12782 | 4.300084104 | 0.99999999 | 0.53691018 | 58.76494 |
| GOTERM_BP_FAT   | GO:0055072~iron ion homeostasis                                    | 4   | 0.941176471 | 0.065019  | 214211_AT,` | 350 | 36    | 13528 | 4.294603175 | 1          | 0.43098963 | 69.18192 |
| GOTERM_BP_FAT   | GO:0048168~regulation of neuronal synaptic plasticity              | 4   | 0.941176471 | 0.065019  | 201694_S_A` | 350 | 36    | 13528 | 4.294603175 | 1          | 0.43098963 | 69.18192 |

|                 |                                                                             |    |             |           |             |     |      |       |             |            |            |          |
|-----------------|-----------------------------------------------------------------------------|----|-------------|-----------|-------------|-----|------|-------|-------------|------------|------------|----------|
| GOTERM_MF_FAT   | GO:0050661~NADP or NADPH binding                                            | 4  | 0.941176471 | 0.0655007 | 201266_AT,: | 337 | 36   | 12983 | 4.280580284 | 1          | 0.55811081 | 63.63996 |
| GOTERM_BP_FAT   | GO:0070663~regulation of leukocyte proliferation                            | 6  | 1.411764706 | 0.0658572 | 220049_S_A' | 350 | 84   | 13528 | 2.760816327 | 1          | 0.4341002  | 69.66207 |
| GOTERM_BP_FAT   | GO:0032944~regulation of mononuclear cell proliferation                     | 6  | 1.411764706 | 0.0658572 | 220049_S_A' | 350 | 84   | 13528 | 2.760816327 | 1          | 0.4341002  | 69.66207 |
| SP_PIR_KEYWORDS | oxidoreductase                                                              | 19 | 4.470588235 | 0.0659856 | 214211_AT,: | 418 | 562  | 19235 | 1.555726302 | 1          | 0.3828447  | 61.44861 |
| GOTERM_BP_FAT   | GO:0050801~ion homeostasis                                                  | 17 | 4           | 0.0660277 | 201464_X_A' | 350 | 409  | 13528 | 1.606538596 | 1          | 0.43381406 | 69.75891 |
| GOTERM_CC_FAT   | GO:0048179~activin receptor complex                                         | 2  | 0.470588235 | 0.0663128 | 203935_AT,: | 290 | 3    | 12782 | 29.38390805 | 0.99999999 | 0.52987251 | 59.53421 |
| KEGG_PATHWAY    | hsa04540:Gap junction                                                       | 7  | 1.647058824 | 0.0664853 | 209372_X_A' | 165 | 89   | 5085  | 2.423901941 | 0.99990745 | 0.3866576  | 55.36154 |
| GOTERM_MF_FAT   | GO:0001883~purine nucleoside binding                                        | 52 | 12.23529412 | 0.0667157 | 209307_AT,: | 337 | 1601 | 12983 | 1.251287678 | 1          | 0.55835385 | 64.3396  |
| UP_SEQ_FEATURE  | zinc finger region:Phorbol-ester/DAG-type                                   | 4  | 0.941176471 | 0.0670441 | 212717_AT,: | 418 | 43   | 19113 | 4.253477245 | 1          | 0.93025251 | 67.94247 |
| SP_PIR_KEYWORDS | transmembrane protein                                                       | 21 | 4.941176471 | 0.0676467 | 212810_S_A' | 418 | 642  | 19235 | 1.505220677 | 1          | 0.38533691 | 62.39496 |
| GOTERM_BP_FAT   | GO:0007049~cell cycle                                                       | 28 | 6.588235294 | 0.0693454 | 203957_AT,: | 350 | 776  | 13528 | 1.394639175 | 1          | 0.44917799 | 71.58554 |
| GOTERM_BP_FAT   | GO:0030301~cholesterol transport                                            | 4  | 0.941176471 | 0.0694585 | 216594_X_A' | 350 | 37   | 13528 | 4.178532819 | 1          | 0.44857048 | 71.64594 |
| GOTERM_BP_FAT   | GO:0019722~calcium-mediated signaling                                       | 4  | 0.941176471 | 0.0694585 | 215253_S_A' | 350 | 37   | 13528 | 4.178532819 | 1          | 0.44857048 | 71.64594 |
| GOTERM_BP_FAT   | GO:0015918~sterol transport                                                 | 4  | 0.941176471 | 0.0694585 | 216594_X_A' | 350 | 37   | 13528 | 4.178532819 | 1          | 0.44857048 | 71.64594 |
| GOTERM_BP_FAT   | GO:0008624~induction of apoptosis by extracellular signals                  | 7  | 1.647058824 | 0.0697892 | 211282_X_A' | 350 | 112  | 13528 | 2.415714286 | 1          | 0.44902983 | 71.82188 |
| GOTERM_BP_FAT   | GO:0046466~membrane lipid catabolic process                                 | 3  | 0.705882353 | 0.0699582 | 219257_S_A' | 350 | 17   | 13528 | 6.820840336 | 1          | 0.44869892 | 71.91133 |
| GOTERM_BP_FAT   | GO:0018205~peptidyl-lysine modification                                     | 3  | 0.705882353 | 0.0699582 | 212722_S_A' | 350 | 17   | 13528 | 6.820840336 | 1          | 0.44869892 | 71.91133 |
| GOTERM_BP_FAT   | GO:0042516~regulation of tyrosine phosphorylation of Stat3 protein          | 3  | 0.705882353 | 0.0699582 | 205266_AT,: | 350 | 17   | 13528 | 6.820840336 | 1          | 0.44869892 | 71.91133 |
| GOTERM_BP_FAT   | GO:0030149~sphingolipid catabolic process                                   | 3  | 0.705882353 | 0.0699582 | 219257_S_A' | 350 | 17   | 13528 | 6.820840336 | 1          | 0.44869892 | 71.91133 |
| GOTERM_BP_FAT   | GO:0051057~positive regulation of small GTPase mediated signal transduction | 3  | 0.705882353 | 0.0699582 | 202443_X_A' | 350 | 17   | 13528 | 6.820840336 | 1          | 0.44869892 | 71.91133 |
| INTERPRO        | IPR007651:Lipin, N-terminal conserved region                                | 2  | 0.470588235 | 0.0703215 | 202459_S_A' | 401 | 3    | 16659 | 27.6957606  | 1          | 0.7925598  | 67.06899 |
| INTERPRO        | IPR004760:L-type amino acid transporter                                     | 2  | 0.470588235 | 0.0703215 | 207528_S_A' | 401 | 3    | 16659 | 27.6957606  | 1          | 0.7925598  | 67.06899 |
| INTERPRO        | IPR002112:Transcription factor Jun                                          | 2  | 0.470588235 | 0.0703215 | 201464_X_A' | 401 | 3    | 16659 | 27.6957606  | 1          | 0.7925598  | 67.06899 |
| INTERPRO        | IPR005643:Jun-like transcription factor                                     | 2  | 0.470588235 | 0.0703215 | 201464_X_A' | 401 | 3    | 16659 | 27.6957606  | 1          | 0.7925598  | 67.06899 |
| INTERPRO        | IPR004755:Cationic amino acid transport permease                            | 2  | 0.470588235 | 0.0703215 | 212290_AT,: | 401 | 3    | 16659 | 27.6957606  | 1          | 0.7925598  | 67.06899 |
| INTERPRO        | IPR008653:Immediate early response                                          | 2  | 0.470588235 | 0.0703215 | 218611_AT,: | 401 | 3    | 16659 | 27.6957606  | 1          | 0.7925598  | 67.06899 |
| GOTERM_MF_FAT   | GO:0030291~protein serine/threonine kinase inhibitor activity               | 3  | 0.705882353 | 0.0703414 | 202763_AT,: | 337 | 17   | 12983 | 6.798568686 | 1          | 0.57168748 | 66.35343 |
| INTERPRO        | IPR014729:Rossmann-like alpha/beta/alpha sandwich fold                      | 4  | 0.941176471 | 0.0706973 | 209674_AT,: | 401 | 40   | 16659 | 4.15436409  | 1          | 0.78512523 | 67.27119 |
| GOTERM_BP_FAT   | GO:0002443~leukocyte mediated immunity                                      | 6  | 1.411764706 | 0.0713427 | 205745_X_A' | 350 | 86   | 13528 | 2.696611296 | 1          | 0.45424283 | 72.63451 |
| GOTERM_BP_FAT   | GO:0006606~protein import into nucleus                                      | 6  | 1.411764706 | 0.0713427 | 201464_X_A' | 350 | 86   | 13528 | 2.696611296 | 1          | 0.45424283 | 72.63451 |
| GOTERM_MF_FAT   | GO:0032561~guanyl ribonucleotide binding                                    | 16 | 3.764705882 | 0.0723925 | 213923_AT,: | 337 | 382  | 12983 | 1.613621887 | 1          | 0.57609789 | 67.44517 |
| GOTERM_MF_FAT   | GO:0019001~guanyl nucleotide binding                                        | 16 | 3.764705882 | 0.0723925 | 213923_AT,: | 337 | 382  | 12983 | 1.613621887 | 1          | 0.57609789 | 67.44517 |
| GOTERM_BP_FAT   | GO:0070482~response to oxygen levels                                        | 8  | 1.882352941 | 0.0727566 | 205745_X_A' | 350 | 141  | 13528 | 2.192988855 | 1          | 0.45984219 | 73.35488 |
| GOTERM_CC_FAT   | GO:0030173~integral to Golgi membrane                                       | 4  | 0.941176471 | 0.0728319 | 218871_X_A' | 290 | 43   | 12782 | 4.100080192 | 1          | 0.55059521 | 63.10522 |
| KEGG_PATHWAY    | hsa00603:Glycosphingolipid biosynthesis                                     | 3  | 0.705882353 | 0.0729922 | 208322_S_A' | 165 | 14   | 5085  | 6.603896104 | 0.999964   | 0.40046741 | 58.87602 |
| SP_PIR_KEYWORDS | heterodimer                                                                 | 6  | 1.411764706 | 0.0734258 | 209372_X_A' | 418 | 103  | 19235 | 2.68058717  | 1          | 0.40601554 | 65.52208 |
| GOTERM_MF_FAT   | GO:0030554~adenyl nucleotide binding                                        | 51 | 12          | 0.0735467 | 209307_AT,: | 337 | 1577 | 12983 | 1.2459013   | 1          | 0.57574906 | 68.04491 |
| GOTERM_CC_FAT   | GO:0030027~lamellipodium                                                    | 5  | 1.176470588 | 0.0737054 | 202149_AT,: | 290 | 70   | 12782 | 3.148275862 | 1          | 0.54150596 | 63.56091 |
| SMART           | SM00233:PH                                                                  | 13 | 3.058823529 | 0.0739277 | 218000_S_A' | 247 | 277  | 9079  | 1.725061752 | 0.99999802 | 0.63587356 | 60.85552 |
| GOTERM_BP_FAT   | GO:0055092~sterol homeostasis                                               | 4  | 0.941176471 | 0.0740313 | 216594_X_A' | 350 | 38   | 13528 | 4.068571429 | 1          | 0.4647027  | 73.98899 |
| GOTERM_BP_FAT   | GO:0042632~cholesterol homeostasis                                          | 4  | 0.941176471 | 0.0740313 | 216594_X_A' | 350 | 38   | 13528 | 4.068571429 | 1          | 0.4647027  | 73.98899 |
| GOTERM_MF_FAT   | GO:0017048~Rho GTPase binding                                               | 4  | 0.941176471 | 0.074572  | 214014_AT,: | 337 | 38   | 12983 | 4.055286584 | 1          | 0.57476616 | 68.56902 |
| GOTERM_BP_FAT   | GO:0051052~regulation of DNA metabolic process                              | 7  | 1.647058824 | 0.0746354 | 201464_X_A' | 350 | 114  | 13528 | 2.373333333 | 1          | 0.46637143 | 74.28453 |
| INTERPRO        | IPR015421:Pyridoxal phosphate-dependent transferase, major region, subdom   | 4  | 0.941176471 | 0.0749786 | 212322_AT,: | 401 | 41   | 16659 | 4.053038136 | 1          | 0.79614874 | 69.49428 |
| GOTERM_BP_FAT   | GO:0032227~negative regulation of synaptic transmission, dopaminergic       | 2  | 0.470588235 | 0.075421  | 204748_AT,: | 350 | 3    | 13528 | 25.76761905 | 1          | 0.46886658 | 74.66406 |
| GOTERM_BP_FAT   | GO:0050667~homocysteine metabolic process                                   | 2  | 0.470588235 | 0.075421  | 206085_S_A' | 350 | 3    | 13528 | 25.76761905 | 1          | 0.46886658 | 74.66406 |
| GOTERM_BP_FAT   | GO:0006564~L-serine biosynthetic process                                    | 2  | 0.470588235 | 0.075421  | 201397_AT,: | 350 | 3    | 13528 | 25.76761905 | 1          | 0.46886658 | 74.66406 |
| GOTERM_CC_FAT   | GO:0043232~intracellular non-membrane-bounded organelle                     | 70 | 16.47058824 | 0.0754703 | 201464_X_A' | 290 | 2596 | 12782 | 1.188486265 | 1          | 0.53730547 | 64.4658  |
| GOTERM_CC_FAT   | GO:0043228~non-membrane-bounded organelle                                   | 70 | 16.47058824 | 0.0754703 | 201464_X_A' | 290 | 2596 | 12782 | 1.188486265 | 1          | 0.53730547 | 64.4658  |
| GOTERM_BP_FAT   | GO:0005315~inorganic phosphate transmembrane transporter activity           | 2  | 0.470588235 | 0.0756537 | 201920_AT,: | 337 | 3    | 12983 | 25.6834817  | 1          | 0.57410093 | 69.1132  |
| GOTERM_MF_FAT   | GO:0043008~ATP-dependent protein binding                                    | 2  | 0.470588235 | 0.0756537 | 204729_S_A' | 337 | 3    | 12983 | 25.6834817  | 1          | 0.57410093 | 69.1132  |
| GOTERM_MF_FAT   | GO:0004477~methenyltetrahydrofolate cyclohydrolase activity                 | 2  | 0.470588235 | 0.0756537 | 201761_AT,: | 337 | 3    | 12983 | 25.6834817  | 1          | 0.57410093 | 69.1132  |
| GOTERM_MF_FAT   | GO:0004486~methylenetetrahydrofolate dehydrogenase activity                 | 2  | 0.470588235 | 0.0756537 | 201761_AT,: | 337 | 3    | 12983 | 25.6834817  | 1          | 0.57410093 | 69.1132  |
| GOTERM_MF_FAT   | GO:0005173~stem cell factor receptor binding                                | 2  | 0.470588235 | 0.0756537 | 207029_AT,: | 337 | 3    | 12983 | 25.6834817  | 1          | 0.57410093 | 69.1132  |
| UP_SEQ_FEATURE  | domain:LDL-receptor class A 3                                               | 3  | 0.705882353 | 0.0759413 | 217173_S_A' | 418 | 21   | 19113 | 6.532125769 | 1          | 0.94747052 | 72.60262 |

|                 |                                                                              |     |             |           |             |     |       |       |             |             |            |          |
|-----------------|------------------------------------------------------------------------------|-----|-------------|-----------|-------------|-----|-------|-------|-------------|-------------|------------|----------|
| UP_SEQ_FEATURE  | domain:PLAT                                                                  | 3   | 0.705882353 | 0.0759413 | 212561_AT,: | 418 | 21    | 19113 | 6.532125769 | 1           | 0.94747052 | 72.60262 |
| PIR_SUPERFAMILY | PIRSF001715:rel-related protein                                              | 2   | 0.470588235 | 0.0762705 | 209878_S_A` | 194 | 3     | 7396  | 25.41580756 | 0.999999996 | 0.94250721 | 63.46562 |
| PIR_SUPERFAMILY | PIRSF001961:LDL receptor                                                     | 2   | 0.470588235 | 0.0762705 | 217173_S_A` | 194 | 3     | 7396  | 25.41580756 | 0.999999996 | 0.94250721 | 63.46562 |
| PIR_SUPERFAMILY | PIRSF005475:glutamate/aspartate transport protein                            | 2   | 0.470588235 | 0.0762705 | 212810_S_A` | 194 | 3     | 7396  | 25.41580756 | 0.999999996 | 0.94250721 | 63.46562 |
| PIR_SUPERFAMILY | PIRSF037826:transcription factor Mafk                                        | 2   | 0.470588235 | 0.0762705 | 204970_S_A` | 194 | 3     | 7396  | 25.41580756 | 0.999999996 | 0.94250721 | 63.46562 |
| PIR_SUPERFAMILY | PIRSF015614:TNF receptor-associated factor (TRAF)                            | 2   | 0.470588235 | 0.0762705 | 205599_AT,: | 194 | 3     | 7396  | 25.41580756 | 0.999999996 | 0.94250721 | 63.46562 |
| KEGG_PATHWAY    | hsa00260:Glycine, serine and threonine metabolism                            | 4   | 0.941176471 | 0.0766375 | 201397_AT,: | 165 | 31    | 5085  | 3.976539589 | 0.99997885  | 0.40104681 | 60.73242 |
| GOTERM_CC_FAT   | GO:0005905~coated pit                                                        | 4   | 0.941176471 | 0.0769103 | 217173_S_A` | 290 | 44    | 12782 | 4.006896552 | 1           | 0.53181637 | 65.18871 |
| GOTERM_BP_FAT   | GO:0051170~nuclear import                                                    | 6   | 1.411764706 | 0.0770715 | 201464_X_A` | 350 | 88    | 13528 | 2.635324675 | 1           | 0.4753037  | 75.44439 |
| UP_SEQ_FEATURE  | sequence variant                                                             | 277 | 65.17647059 | 0.077177  | 201464_X_A` | 418 | 11992 | 19113 | 1.05618678  | 1           | 0.94581328 | 73.19708 |
| INTERPRO        | IPR011029:DEATH-like                                                         | 5   | 1.176470588 | 0.0772699 | 209636_AT,: | 401 | 67    | 16659 | 3.100271709 | 1           | 0.79765649 | 70.62528 |
| INTERPRO        | IPR002219:Protein kinase C-like, phorbol ester/diacylglycerol binding        | 5   | 1.176470588 | 0.0772699 | 212717_AT,: | 401 | 67    | 16659 | 3.100271709 | 1           | 0.79765649 | 70.62528 |
| GOTERM_BP_FAT   | GO:0010464~regulation of mesenchymal cell proliferation                      | 3   | 0.705882353 | 0.0774008 | 212171_X_A` | 350 | 18    | 13528 | 6.441904762 | 1           | 0.47564505 | 75.59732 |
| GOTERM_BP_FAT   | GO:0045987~positive regulation of smooth muscle contraction                  | 3   | 0.705882353 | 0.0774008 | 219257_S_A` | 350 | 18    | 13528 | 6.441904762 | 1           | 0.47564505 | 75.59732 |
| KEGG_PATHWAY    | hsa05218:Melanoma                                                            | 6   | 1.411764706 | 0.0779033 | 208378_X_A` | 165 | 71    | 5085  | 2.604353393 | 0.99998243  | 0.39206708 | 61.35888 |
| GOTERM_BP_FAT   | GO:0044271~nitrogen compound biosynthetic process                            | 14  | 3.294117647 | 0.079018  | 201468_S_A` | 350 | 325   | 13528 | 1.664984615 | 1           | 0.48180012 | 76.33549 |
| BIOCARTA        | h_LairPathway:Cells and Molecules involved in local acute inflammatory respo | 4   | 0.941176471 | 0.0795579 | 205207_AT,: | 94  | 16    | 1437  | 3.821808511 | 0.99999983  | 0.99445655 | 64.24734 |
| GOTERM_CC_FAT   | GO:0031226~intrinsic to plasma membrane                                      | 36  | 8.470588235 | 0.0803222 | 212810_S_A` | 290 | 1215  | 12782 | 1.305951469 | 1           | 0.53584757 | 66.84759 |
| GOTERM_CC_FAT   | GO:0031982~vesicle                                                           | 22  | 5.176470588 | 0.0805457 | 218000_S_A` | 290 | 670   | 12782 | 1.447267113 | 1           | 0.52523691 | 66.95368 |
| INTERPRO        | IPR013753:Ras                                                                | 7   | 1.647058824 | 0.0808404 | 218360_AT,: | 401 | 125   | 16659 | 2.32644389  | 1           | 0.80443744 | 72.30991 |
| GOTERM_BP_FAT   | GO:0031399~regulation of protein modification process                        | 13  | 3.058823529 | 0.0811405 | 201464_X_A` | 350 | 295   | 13528 | 1.703283293 | 1           | 0.49009087 | 77.27243 |
| UP_SEQ_FEATURE  | domain:t-SNARE coiled-coil homology                                          | 3   | 0.705882353 | 0.0823685 | 204729_S_A` | 418 | 22    | 19113 | 6.235210961 | 1           | 0.95206869 | 75.56473 |
| UP_SEQ_FEATURE  | region of interest:Hinge                                                     | 3   | 0.705882353 | 0.0823685 | 210426_X_A` | 418 | 22    | 19113 | 6.235210961 | 1           | 0.95206869 | 75.56473 |
| GOTERM_MF_FAT   | GO:0043566~structure-specific DNA binding                                    | 8   | 1.882352941 | 0.0826858 | 201464_X_A` | 337 | 145   | 12983 | 2.12552952  | 1           | 0.60190342 | 72.44232 |
| GOTERM_BP_FAT   | GO:0031668~cellular response to extracellular stimulus                       | 5   | 1.176470588 | 0.0829936 | 201464_X_A` | 350 | 64    | 13528 | 3.019642857 | 1           | 0.49704424 | 78.06172 |
| GOTERM_BP_FAT   | GO:0001819~positive regulation of cytokine production                        | 6   | 1.411764706 | 0.0830412 | 205745_X_A` | 350 | 90    | 13528 | 2.576761905 | 1           | 0.49608188 | 78.08164 |
| GOTERM_BP_FAT   | GO:0043523~regulation of neuron apoptosis                                    | 6   | 1.411764706 | 0.0830412 | 201464_X_A` | 350 | 90    | 13528 | 2.576761905 | 1           | 0.49608188 | 78.08164 |
| SP_PIR_KEYWORDS | Flavoprotein                                                                 | 6   | 1.411764706 | 0.0833181 | 201468_S_A` | 418 | 107   | 19235 | 2.580378303 | 1           | 0.44251222 | 70.3209  |
| SP_PIR_KEYWORDS | amino acid transport                                                         | 2   | 0.470588235 | 0.0839439 | 212810_S_A` | 418 | 4     | 19235 | 23.00837321 | 1           | 0.43968001 | 70.60255 |
| SP_PIR_KEYWORDS | phosphate transport                                                          | 2   | 0.470588235 | 0.0839439 | 201920_AT,: | 418 | 4     | 19235 | 23.00837321 | 1           | 0.43968001 | 70.60255 |
| GOTERM_BP_FAT   | GO:0033365~protein localization in organelle                                 | 8   | 1.882352941 | 0.0839996 | 201464_X_A` | 350 | 146   | 13528 | 2.117886497 | 1           | 0.49906205 | 78.47929 |
| UP_SEQ_FEATURE  | domain:BAG                                                                   | 2   | 0.470588235 | 0.0844621 | 217911_S_A` | 418 | 4     | 19113 | 22.86244019 | 1           | 0.95210507 | 76.46277 |
| UP_SEQ_FEATURE  | region of interest:Defines substrate specificity                             | 2   | 0.470588235 | 0.0844621 | 216236_S_A` | 418 | 4     | 19113 | 22.86244019 | 1           | 0.95210507 | 76.46277 |
| UP_SEQ_FEATURE  | domain:VPS37 C-terminal                                                      | 2   | 0.470588235 | 0.0844621 | 219053_S_A` | 418 | 4     | 19113 | 22.86244019 | 1           | 0.95210507 | 76.46277 |
| UP_SEQ_FEATURE  | domain:WHEP-TRS                                                              | 2   | 0.470588235 | 0.0844621 | 208693_S_A` | 418 | 4     | 19113 | 22.86244019 | 1           | 0.95210507 | 76.46277 |
| UP_SEQ_FEATURE  | short sequence motif:LXXIL motif                                             | 2   | 0.470588235 | 0.0844621 | 202459_S_A` | 418 | 4     | 19113 | 22.86244019 | 1           | 0.95210507 | 76.46277 |
| GOTERM_BP_FAT   | GO:0015837~amine transport                                                   | 7   | 1.647058824 | 0.0848883 | 212810_S_A` | 350 | 118   | 13528 | 2.292881356 | 1           | 0.50171102 | 78.84193 |
| GOTERM_CC_FAT   | GO:0015629~actin cytoskeleton                                                | 11  | 2.588235294 | 0.0849767 | 205745_X_A` | 290 | 269   | 12782 | 1.802358672 | 1           | 0.53381573 | 68.99298 |
| GOTERM_BP_FAT   | GO:0046626~regulation of insulin receptor signaling pathway                  | 3   | 0.705882353 | 0.0850788 | 202545_AT,: | 350 | 19    | 13528 | 6.102857143 | 1           | 0.50136198 | 78.91892 |
| GOTERM_CC_FAT   | GO:0031228~intrinsic to Golgi membrane                                       | 4   | 0.941176471 | 0.0853598 | 218871_X_A` | 290 | 46    | 12782 | 3.832683658 | 1           | 0.52457104 | 69.16373 |
| GOTERM_CC_FAT   | GO:0030018~Z disc                                                            | 4   | 0.941176471 | 0.0853598 | 202949_S_A` | 290 | 46    | 12782 | 3.832683658 | 1           | 0.52457104 | 69.16373 |
| GOTERM_BP_FAT   | GO:0046942~carboxylic acid transport                                         | 8   | 1.882352941 | 0.0863615 | 212810_S_A` | 350 | 147   | 13528 | 2.103479106 | 1           | 0.50564351 | 79.43044 |
| GOTERM_BP_FAT   | GO:0048754~branching morphogenesis of a tube                                 | 5   | 1.176470588 | 0.0867322 | 203935_AT,: | 350 | 65    | 13528 | 2.973186813 | 1           | 0.50604584 | 79.57606 |
| GOTERM_BP_FAT   | GO:0016481~negative regulation of transcription                              | 18  | 4.235294118 | 0.0867335 | 213138_AT,: | 350 | 459   | 13528 | 1.515742297 | 1           | 0.50489645 | 79.57658 |
| GOTERM_CC_FAT   | GO:0033256~I-kappaB/NF-kappaB complex                                        | 2   | 0.470588235 | 0.0874283 | 209636_AT,: | 290 | 4     | 12782 | 22.03793103 | 1           | 0.52287731 | 70.07069 |
| GOTERM_BP_FAT   | GO:0001570~vasculogenesis                                                    | 4   | 0.941176471 | 0.0885183 | 219778_AT,: | 350 | 41    | 13528 | 3.77087108  | 1           | 0.51118735 | 80.26426 |
| GOTERM_BP_FAT   | GO:0006446~regulation of translational initiation                            | 4   | 0.941176471 | 0.0885183 | 212227_X_A` | 350 | 41    | 13528 | 3.77087108  | 1           | 0.51118735 | 80.26426 |
| GOTERM_BP_FAT   | GO:0015849~organic acid transport                                            | 8   | 1.882352941 | 0.088761  | 212810_S_A` | 350 | 148   | 13528 | 2.089266409 | 1           | 0.51103803 | 80.35603 |
| GOTERM_MF_FAT   | GO:0004715~non-membrane spanning protein tyrosine kinase activity            | 4   | 0.941176471 | 0.0891512 | 206411_S_A` | 337 | 41    | 12983 | 3.758558298 | 1           | 0.62486647 | 75.20481 |
| GOTERM_CC_FAT   | GO:0016323~basolateral plasma membrane                                       | 9   | 2.117647059 | 0.0893723 | 205745_X_A` | 290 | 203   | 12782 | 1.954102259 | 1           | 0.52077954 | 70.90053 |
| GOTERM_CC_FAT   | GO:0005887~integral to plasma membrane                                       | 35  | 8.235294118 | 0.0898905 | 212810_S_A` | 290 | 1188  | 12782 | 1.29853129  | 1           | 0.5130091  | 71.11813 |
| BBID            | 51.CD40_and_EBV                                                              | 3   | 0.705882353 | 0.0909455 | 205599_AT,: | 28  | 7     | 358   | 5.479591837 | 0.99796603  | 0.95490042 | 62.16014 |
| BBID            | 110.CRHandLC-NA                                                              | 3   | 0.705882353 | 0.0909455 | 205266_AT,: | 28  | 7     | 358   | 5.479591837 | 0.99796603  | 0.95490042 | 62.16014 |
| UP_SEQ_FEATURE  | domain:J                                                                     | 4   | 0.941176471 | 0.0911603 | 202843_AT,: | 418 | 49    | 19113 | 3.732643297 | 1           | 0.9596158  | 79.13215 |
| BIOCARTA        | h_tnfr2Pathway:TNFR2 Signaling Pathway                                       | 4   | 0.941176471 | 0.0922366 | 205599_AT,: | 94  | 17    | 1437  | 3.596996245 | 0.99999999  | 0.98941438 | 69.89963 |

|                 |                                                                     |    |             |           |             |     |     |       |             |            |            |          |
|-----------------|---------------------------------------------------------------------|----|-------------|-----------|-------------|-----|-----|-------|-------------|------------|------------|----------|
| GOTERM_BP_FAT   | GO:0030099~myeloid cell differentiation                             | 6  | 1.411764706 | 0.0924406 | 212171_X_A` | 350 | 93  | 13528 | 2.493640553 | 1          | 0.52487037 | 81.6995  |
| INTERPRO        | IPR000580:TSC-22 / Dip / Bun                                        | 2  | 0.470588235 | 0.0926481 | 204094_S_A` | 401 | 4   | 16659 | 20.77182045 | 1          | 0.84040565 | 77.26017 |
| INTERPRO        | IPR000672:Tetrahydrofolate dehydrogenase/cyclohydrolase             | 2  | 0.470588235 | 0.0926481 | 201761_AT,; | 401 | 4   | 16659 | 20.77182045 | 1          | 0.84040565 | 77.26017 |
| INTERPRO        | IPR009851:Modifier of rudimentary, Modr                             | 2  | 0.470588235 | 0.0926481 | 219053_S_A` | 401 | 4   | 16659 | 20.77182045 | 1          | 0.84040565 | 77.26017 |
| GOTERM_BP_FAT   | GO:0051607~defense response to virus                                | 3  | 0.705882353 | 0.0929752 | 205207_AT,; | 350 | 20  | 13528 | 5.797714286 | 1          | 0.52585495 | 81.88734 |
| GOTERM_BP_FAT   | GO:0033619~membrane protein proteolysis                             | 3  | 0.705882353 | 0.0929752 | 205745_X_A` | 350 | 20  | 13528 | 5.797714286 | 1          | 0.52585495 | 81.88734 |
| GOTERM_BP_FAT   | GO:0000188~inactivation of MAPK activity                            | 3  | 0.705882353 | 0.0929752 | 206374_AT,; | 350 | 20  | 13528 | 5.797714286 | 1          | 0.52585495 | 81.88734 |
| GOTERM_BP_FAT   | GO:0030516~regulation of axon extension                             | 3  | 0.705882353 | 0.0929752 | 216959_X_A` | 350 | 20  | 13528 | 5.797714286 | 1          | 0.52585495 | 81.88734 |
| GOTERM_CC_FAT   | GO:0031252~cell leading edge                                        | 7  | 1.647058824 | 0.0930526 | 205745_X_A` | 290 | 138 | 12782 | 2.235732134 | 1          | 0.51612637 | 72.4136  |
| GOTERM_BP_FAT   | GO:0042692~muscle cell differentiation                              | 7  | 1.647058824 | 0.0930632 | 202146_AT,; | 350 | 121 | 13528 | 2.236033058 | 1          | 0.52505257 | 81.9181  |
| GOTERM_BP_FAT   | GO:0014070~response to organic cyclic substance                     | 7  | 1.647058824 | 0.0930632 | 201464_X_A` | 350 | 121 | 13528 | 2.236033058 | 1          | 0.52505257 | 81.9181  |
| KEGG_PATHWAY    | hsa04370:VEGF signaling pathway                                     | 6  | 1.411764706 | 0.0934288 | 207000_S_A` | 165 | 75  | 5085  | 2.465454545 | 0.99999822 | 0.43770034 | 68.33404 |
| KEGG_PATHWAY    | hsa04662:B cell receptor signaling pathway                          | 6  | 1.411764706 | 0.0934288 | 201464_X_A` | 165 | 75  | 5085  | 2.465454545 | 0.99999822 | 0.43770034 | 68.33404 |
| GOTERM_BP_FAT   | GO:0022405~hair cycle process                                       | 4  | 0.941176471 | 0.0935927 | 213198_AT,; | 350 | 42  | 13528 | 3.681088435 | 1          | 0.52601055 | 82.10202 |
| GOTERM_BP_FAT   | GO:0022404~molting cycle process                                    | 4  | 0.941176471 | 0.0935927 | 213198_AT,; | 350 | 42  | 13528 | 3.681088435 | 1          | 0.52601055 | 82.10202 |
| GOTERM_BP_FAT   | GO:0001942~hair follicle development                                | 4  | 0.941176471 | 0.0935927 | 213198_AT,; | 350 | 42  | 13528 | 3.681088435 | 1          | 0.52601055 | 82.10202 |
| SMART           | SM00220:S_Tkc                                                       | 12 | 2.823529412 | 0.093795  | 201739_AT,; | 247 | 259 | 9079  | 1.703030966 | 0.99999995 | 0.69970268 | 69.96325 |
| SP_PIR_KEYWORDS | Symport                                                             | 6  | 1.411764706 | 0.093878  | 212810_S_A` | 418 | 111 | 19235 | 2.487391698 | 1          | 0.47311801 | 74.75428 |
| GOTERM_BP_FAT   | GO:0022402~cell cycle process                                       | 21 | 4.941176471 | 0.0941973 | 203957_AT,; | 350 | 565 | 13528 | 1.43660177  | 1          | 0.52725866 | 82.30989 |
| SP_PIR_KEYWORDS | cell shape                                                          | 3  | 0.705882353 | 0.0946682 | 209209_S_A` | 418 | 24  | 19235 | 5.752093301 | 1          | 0.47069408 | 75.05997 |
| KEGG_PATHWAY    | hsa00270:Cysteine and methionine metabolism                         | 4  | 0.941176471 | 0.0952464 | 200768_S_A` | 165 | 34  | 5085  | 3.625668449 | 0.99999865 | 0.43051398 | 69.0704  |
| UP_SEQ_FEATURE  | domain:LIM zinc-binding 2                                           | 4  | 0.941176471 | 0.095487  | 215706_X_A` | 418 | 50  | 19113 | 3.657990431 | 1          | 0.96264748 | 80.7024  |
| UP_SEQ_FEATURE  | domain:LIM zinc-binding 1                                           | 4  | 0.941176471 | 0.095487  | 215706_X_A` | 418 | 50  | 19113 | 3.657990431 | 1          | 0.96264748 | 80.7024  |
| KEGG_PATHWAY    | hsa04912:GnRH signaling pathway                                     | 7  | 1.647058824 | 0.0955844 | 201464_X_A` | 165 | 98  | 5085  | 2.201298701 | 0.99999871 | 0.41871713 | 69.20559 |
| GOTERM_CC_FAT   | GO:0070161~anchoring junction                                       | 8  | 1.882352941 | 0.0956305 | 205745_X_A` | 290 | 172 | 12782 | 2.050040096 | 1          | 0.51684956 | 73.42978 |
| GOTERM_BP_FAT   | GO:0034504~protein localization in nucleus                          | 6  | 1.411764706 | 0.0956904 | 201464_X_A` | 350 | 94  | 13528 | 2.467112462 | 1          | 0.53197959 | 82.81356 |
| GOTERM_MF_FAT   | GO:0050662~coenzyme binding                                         | 9  | 2.117647059 | 0.0982949 | 201468_S_A` | 337 | 181 | 12983 | 1.915618801 | 1          | 0.65670538 | 78.67297 |
| GOTERM_BP_FAT   | GO:0030218~erythrocyte differentiation                              | 4  | 0.941176471 | 0.0987841 | 212171_X_A` | 350 | 43  | 13528 | 3.595481728 | 1          | 0.54277795 | 83.8144  |
| GOTERM_BP_FAT   | GO:0042633~hair cycle                                               | 4  | 0.941176471 | 0.0987841 | 213198_AT,; | 350 | 43  | 13528 | 3.595481728 | 1          | 0.54277795 | 83.8144  |
| GOTERM_BP_FAT   | GO:0042303~molting cycle                                            | 4  | 0.941176471 | 0.0987841 | 213198_AT,; | 350 | 43  | 13528 | 3.595481728 | 1          | 0.54277795 | 83.8144  |
| GOTERM_MF_FAT   | GO:0019992~diacylglycerol binding                                   | 5  | 1.176470588 | 0.0992643 | 212717_AT,; | 337 | 68  | 12983 | 2.832736952 | 1          | 0.65472095 | 79.01284 |
| GOTERM_BP_FAT   | GO:0034383~low-density lipoprotein particle clearance               | 2  | 0.470588235 | 0.0992789 | 217173_S_A` | 350 | 4   | 13528 | 19.32571429 | 1          | 0.54351382 | 83.96929 |
| GOTERM_BP_FAT   | GO:0002467~germinal center formation                                | 2  | 0.470588235 | 0.0992789 | 205745_X_A` | 350 | 4   | 13528 | 19.32571429 | 1          | 0.54351382 | 83.96929 |
| GOTERM_BP_FAT   | GO:0046683~response to organophosphorus                             | 2  | 0.470588235 | 0.0992789 | 216594_X_A` | 350 | 4   | 13528 | 19.32571429 | 1          | 0.54351382 | 83.96929 |
| GOTERM_MF_FAT   | GO:0003704~specific RNA polymerase II transcription factor activity | 4  | 0.941176471 | 0.0994802 | 202443_X_A` | 337 | 43  | 12983 | 3.583741633 | 1          | 0.64986745 | 79.08785 |
| GOTERM_MF_FAT   | GO:0034189~very-low-density lipoprotein binding                     | 2  | 0.470588235 | 0.0995813 | 217173_S_A` | 337 | 4   | 12983 | 19.26261128 | 1          | 0.64464925 | 79.12287 |
| GOTERM_MF_FAT   | GO:0016361~activin receptor activity, type I                        | 2  | 0.470588235 | 0.0995813 | 203935_AT,; | 337 | 4   | 12983 | 19.26261128 | 1          | 0.64464925 | 79.12287 |
| GOTERM_MF_FAT   | GO:0030229~very-low-density lipoprotein receptor activity           | 2  | 0.470588235 | 0.0995813 | 217173_S_A` | 337 | 4   | 12983 | 19.26261128 | 1          | 0.64464925 | 79.12287 |
| GOTERM_MF_FAT   | GO:0047115~trans-1,2-dihydrobenzene-1,2-diol dehydrogenase activity | 2  | 0.470588235 | 0.0995813 | 216594_X_A` | 337 | 4   | 12983 | 19.26261128 | 1          | 0.64464925 | 79.12287 |
| SP_PIR_KEYWORDS | cytokine                                                            | 8  | 1.882352941 | 0.0995861 | 205266_AT,; | 418 | 181 | 19235 | 2.033889344 | 1          | 0.48343119 | 76.88648 |
| GOTERM_CC_FAT   | GO:0005654~nucleoplasm                                              | 27 | 6.352941176 | 0.0997489 | 201464_X_A` | 290 | 882 | 12782 | 1.349261084 | 1          | 0.52334376 | 74.98171 |



**Supplementary Table 5. Genes induced by Ox-PAPC by 1.5 fold and the induction was reversed by 1.2 fold by ADAM10 silencing.**

Values are represented as log2 scale.

| ProbeSetID  | Gene.Symbol | log2(sc+C)  | log2(sc+Ox40) | log2(ADAM10si+C) | log2(ADAM10si+Ox50) | cutoff by log2(1.5) value |                                    | cutoff by -log2(1.2) value                           |  |
|-------------|-------------|-------------|---------------|------------------|---------------------|---------------------------|------------------------------------|------------------------------------------------------|--|
|             |             |             |               |                  |                     | log2[(sc+Ox40)/(sc+C)]    | log2[(ADAM10si+Ox40)/(ADAM10si+C)] | The effects ADAM10si on Fold induction by Ox40 (H-G) |  |
| 206942_s_at | PMCH        | 4.003389709 | 5.696800404   | 3.590252153      | 3.899857078         | 1.693410695               | 0.309604925                        | -1.38380577                                          |  |
| 207029_at   | KITLG       | 3.151881632 | 5.357321076   | 3.359027062      | 4.275864385         | 2.205439444               | 0.916837323                        | -1.288602121                                         |  |
| 211124_s_at | KITLG       | 2.964011187 | 5.155668728   | 3.110940088      | 4.220911211         | 2.191657541               | 1.109971123                        | -1.081686418                                         |  |
| 219908_at   | DKK2        | 3.622643313 | 4.528405227   | 3.43654688       | 3.337783196         | 0.905761915               | -0.098763685                       | -1.004525599                                         |  |
| 203438_at   | STC2        | 6.460635532 | 8.884899541   | 6.985337525      | 8.427216885         | 2.424264009               | 1.44187936                         | -0.982384649                                         |  |
| 219371_s_at | KLF2        | 5.781491767 | 8.32906882    | 6.392785262      | 8.049214092         | 2.547577053               | 1.65642883                         | -0.891148223                                         |  |
| 206765_at   | KCNJ2       | 6.685117747 | 7.927117803   | 6.756573392      | 7.174655082         | 1.242000057               | 0.41808169                         | -0.823918367                                         |  |
| 219270_at   | CHAC1       | 4.803703742 | 8.198312686   | 5.385948444      | 8.006949548         | 3.394608944               | 2.621001104                        | -0.773607839                                         |  |
| 209948_at   | KCNMB1      | 3.676331853 | 4.429961724   | 3.764436354      | 3.758305486         | 0.753629871               | -0.006130868                       | -0.759760739                                         |  |
| 204285_s_at | PMAIP1      | 7.584912955 | 9.133786321   | 8.390146174      | 9.193560124         | 1.548873365               | 0.80341395                         | -0.745459415                                         |  |
| 221489_s_at | SPRY4       | 5.020900733 | 6.8263897     | 6.171394812      | 7.242014586         | 1.805488968               | 1.070619774                        | -0.734869194                                         |  |
| 212226_s_at | PPAP2B      | 7.174642961 | 8.047572569   | 8.11391829       | 8.277188515         | 0.872929608               | 0.163270225                        | -0.709659383                                         |  |
| 222162_s_at | ADAMTS1     | 7.127516346 | 9.297423055   | 7.882476838      | 9.343380988         | 2.169906709               | 1.46090415                         | -0.709002559                                         |  |
| 205680_at   | MPN10       | 7.402322403 | 8.379593845   | 8.580563544      | 8.850461783         | 0.977271442               | 0.269898239                        | -0.707373204                                         |  |
| 211924_s_at | PLAUR       | 7.026525418 | 8.190238001   | 8.03048998       | 8.509269875         | 1.163712583               | 0.478779894                        | -0.684932689                                         |  |
| 220655_at   | TNIP3       | 3.546038592 | 5.108458015   | 3.635570626      | 4.513530687         | 1.562419423               | 0.877960062                        | -0.684459361                                         |  |
| 210139_s_at | PMP22       | 9.133708107 | 10.23016622   | 9.684054396      | 10.10281248         | 1.096458117               | 0.418758087                        | -0.677700029                                         |  |
| 201195_s_at | SLC7A5      | 5.943054797 | 8.420933332   | 6.652820379      | 8.456062926         | 2.477878535               | 1.803242546                        | -0.674635989                                         |  |
| 210118_s_at | IL1A        | 4.615137895 | 7.368468764   | 6.096681246      | 8.178840689         | 2.753330869               | 2.082159442                        | -0.671171427                                         |  |
| 36711_at    | MAFF        | 9.550314263 | 11.10768707   | 10.5605574       | 11.47075859         | 1.557372805               | 0.910201187                        | -0.647171618                                         |  |
| 203439_s_at | STC2        | 5.572923946 | 6.735232101   | 6.006554844      | 6.528358902         | 1.162308155               | 0.521804059                        | -0.640504096                                         |  |
| 206715_at   | TFEC        | 6.387204682 | 7.503321741   | 7.003905602      | 7.4811301           | 1.116117059               | 0.477224498                        | -0.638892561                                         |  |
| 205047_s_at | ASNS        | 6.880706694 | 8.878131624   | 6.83699635       | 8.209876714         | 1.99742493                | 1.372880364                        | -0.624544567                                         |  |
| 212501_at   | CEBPB       | 7.368199722 | 9.127343051   | 7.803010894      | 8.937675116         | 1.759143329               | 1.134664222                        | -0.624479107                                         |  |
| 202638_s_at | ICAM1       | 7.209096039 | 7.948533384   | 7.733464792      | 7.867722316         | 0.739437345               | 0.134257525                        | -0.60517982                                          |  |
| 209355_s_at | PPAP2B      | 6.320122587 | 7.237775579   | 7.198100107      | 7.513844288         | 0.917652992               | 0.315744182                        | -0.60190881                                          |  |
| 205547_s_at | TAGLN       | 7.629521032 | 8.756715382   | 7.681911099      | 8.214031737         | 1.12719435                | 0.532120639                        | -0.595073711                                         |  |
| 200907_s_at | PALLD       | 6.845936804 | 8.838042951   | 6.949864627      | 8.349376126         | 1.992106147               | 1.399511499                        | -0.592594648                                         |  |
| 209288_s_at | CDC42EP3    | 7.943967644 | 8.781018739   | 8.932339328      | 9.180414339         | 0.837051095               | 0.248075011                        | -0.588976084                                         |  |
| 215977_x_at | GK          | 3.637136562 | 4.262167449   | 3.801125478      | 3.845053091         | 0.625030887               | 0.043927613                        | -0.581103274                                         |  |
| 208025_s_at | HMGA2       | 6.195136142 | 7.171297679   | 7.734954416      | 8.131786342         | 0.976161537               | 0.396831926                        | -0.579329611                                         |  |
| 218145_at   | TRIB3       | 7.617767845 | 9.743675      | 8.027678792      | 9.582506542         | 2.125907155               | 1.55482775                         | -0.571079405                                         |  |
| 205599_at   | TRAF1       | 3.435737712 | 4.078492655   | 3.217284725      | 3.299913935         | 0.642754943               | 0.08262921                         | -0.560125733                                         |  |
| 209286_at   | CDC42EP3    | 7.779521495 | 8.61666269    | 8.978583126      | 9.256560852         | 0.837141195               | 0.277977726                        | -0.559163469                                         |  |
| 210845_s_at | PLAUR       | 6.549023425 | 7.741737337   | 7.538951628      | 8.177797681         | 1.192713913               | 0.638846053                        | -0.55386786                                          |  |
| 204823_at   | NAV3        | 7.238248609 | 8.988451277   | 7.334071892      | 8.53976908          | 1.750202668               | 1.205697188                        | -0.54450548                                          |  |
| 202149_at   | NEDD9       | 7.73425997  | 8.6473137     | 8.576233843      | 8.94643391          | 0.91305373                | 0.370200067                        | -0.542853663                                         |  |
| 206868_at   | STARD8      | 4.592538574 | 5.1870528     | 4.740877874      | 4.796159673         | 0.594514226               | 0.055281799                        | -0.539232427                                         |  |
| 220892_s_at | PSAT1       | 6.729436491 | 8.062018562   | 6.833180385      | 7.627260539         | 1.332582072               | 0.794080155                        | -0.538501917                                         |  |

|             |              |             |             |             |             |             |             |              |
|-------------|--------------|-------------|-------------|-------------|-------------|-------------|-------------|--------------|
| 204977_at   | DDX10        | 7.724663217 | 9.41372041  | 7.638149622 | 8.793905548 | 1.689057193 | 1.155755926 | -0.533301267 |
| 209406_at   | BAG2         | 6.122166806 | 7.057767721 | 5.907454835 | 6.309792085 | 0.935600914 | 0.40233725  | -0.533263665 |
| 211527_x_at | VEGFA        | 3.752790162 | 4.598739436 | 4.062923235 | 4.37855972  | 0.845949273 | 0.315636485 | -0.530312788 |
| 203349_s_at | ETV5         | 5.845109733 | 7.161735469 | 6.673321868 | 7.460053067 | 1.316625736 | 0.786731199 | -0.529894537 |
| 221823_at   | C5orf30      | 6.347993453 | 7.030008194 | 6.559874554 | 6.716375244 | 0.682014741 | 0.156500669 | -0.525514051 |
| 208892_s_at | DUSP6        | 7.986254652 | 8.74262666  | 8.337615106 | 8.569289794 | 0.756372008 | 0.231674688 | -0.52469732  |
| 201761_at   | MTHFD2       | 8.574370636 | 9.803732099 | 8.854332694 | 9.565177728 | 1.229361462 | 0.710845033 | -0.518516429 |
| 220494_s_at | ---          | 5.138082465 | 5.739170106 | 5.570917732 | 5.666921306 | 0.601087641 | 0.096003574 | -0.505084068 |
| 209699_x_at | AKR1C2       | 3.95142814  | 4.691009596 | 3.771422527 | 4.013378375 | 0.739581456 | 0.241955847 | -0.497625609 |
| 209287_s_at | CDC42EP3     | 6.241207554 | 7.227174376 | 7.245292533 | 7.737206251 | 0.985966822 | 0.491913718 | -0.494053104 |
| 204224_s_at | GCH1         | 6.778943623 | 7.89430718  | 7.115325085 | 7.742587721 | 1.115363557 | 0.627262636 | -0.488100921 |
| 216959_x_at | NRCAM        | 6.811566385 | 7.408314014 | 7.485609859 | 7.596646084 | 0.596747629 | 0.111036225 | -0.485711404 |
| 205193_at   | MAFF         | 8.155717098 | 9.803938397 | 9.291781409 | 10.46288084 | 1.648221299 | 1.171099434 | -0.477121864 |
| 204420_at   | FOSL1        | 7.180282775 | 8.2662772   | 7.694623763 | 8.309649068 | 1.085994425 | 0.615025305 | -0.47096912  |
| 202071_at   | SDC4         | 6.218060661 | 6.838611703 | 6.055107684 | 6.205449259 | 0.620551042 | 0.150341575 | -0.470209467 |
| 208893_s_at | DUSP6        | 7.38565978  | 8.188515825 | 7.81743024  | 8.15902572  | 0.802856045 | 0.34159548  | -0.461260565 |
| 211434_s_at | CCRL2        | 4.467928142 | 5.519258552 | 5.047090218 | 5.639408765 | 1.051330411 | 0.592318547 | -0.459011863 |
| 204970_s_at | MAFG         | 6.16811373  | 7.368066595 | 6.535323666 | 7.294971121 | 1.199952865 | 0.759647455 | -0.44030541  |
| 219475_at   | OSGIN1       | 3.995688686 | 7.268037665 | 3.882302196 | 6.714567231 | 3.272348979 | 2.832265035 | -0.440083944 |
| 213281_at   | LOC100288387 | 5.14668571  | 5.909132383 | 5.427424419 | 5.750214934 | 0.762446673 | 0.322790515 | -0.439656158 |
| 206636_at   | RASA2        | 5.448784203 | 6.218749152 | 5.291848459 | 5.622694611 | 0.769964949 | 0.330846152 | -0.439118797 |
| 218691_s_at | PDLIM4       | 4.225373591 | 5.290098752 | 4.569204248 | 5.195238662 | 1.064725162 | 0.626034414 | -0.438690747 |
| 216375_s_at | ETV5         | 4.212407235 | 5.06556748  | 4.890459933 | 5.305515245 | 0.853160245 | 0.415055311 | -0.438104933 |
| 204346_s_at | RASSF1       | 6.380199573 | 7.142739299 | 6.490060893 | 6.817650958 | 0.762539726 | 0.327590065 | -0.434949661 |
| 200670_at   | XBP1         | 6.332170663 | 7.390437723 | 6.520149924 | 7.151337181 | 1.05826706  | 0.631187257 | -0.427079803 |
| 212230_at   | PPAP2B       | 6.245812238 | 7.065571948 | 6.51548167  | 6.918376405 | 0.81975971  | 0.402894735 | -0.416864974 |
| 204341_at   | TRIM16       | 7.689668753 | 8.996536156 | 7.220336703 | 8.115015753 | 1.306867403 | 0.894679051 | -0.412188352 |
| 209785_s_at | PLA2G4C      | 7.895434653 | 8.616141561 | 8.814954598 | 9.134101122 | 0.720706908 | 0.319146525 | -0.401560383 |
| 204203_at   | CEBPG        | 6.825894513 | 7.923400628 | 7.050643407 | 7.749652528 | 1.097506115 | 0.699009121 | -0.398496993 |
| 208891_at   | DUSP6        | 8.591371853 | 9.232636247 | 8.803048558 | 9.049283073 | 0.641264394 | 0.246234516 | -0.395029878 |
| 202207_at   | ARL4C        | 3.781792594 | 4.940814809 | 4.37749579  | 5.147552545 | 1.159022216 | 0.770056755 | -0.388965461 |
| 213895_at   | EMP1         | 6.019047081 | 7.13740129  | 6.37417122  | 7.106376554 | 1.11835421  | 0.732205334 | -0.386148875 |
| 215120_s_at | SAMD4A       | 3.479876128 | 4.112740129 | 3.601364049 | 3.849604425 | 0.632864002 | 0.248240376 | -0.384623626 |
| 204896_s_at | PTGER4       | 5.067830555 | 5.702646391 | 5.246550735 | 5.504295483 | 0.634815836 | 0.257744748 | -0.377071088 |
| 201325_s_at | EMP1         | 9.341950038 | 10.23589601 | 9.798803109 | 10.31648087 | 0.893945969 | 0.517677761 | -0.376268208 |
| 204286_s_at | PMAIP1       | 6.10257409  | 7.479016111 | 6.318293861 | 7.31927861  | 1.376442021 | 1.00098475  | -0.375457271 |
| 200897_s_at | PALLD        | 7.538453403 | 9.370555858 | 7.316199841 | 8.773709917 | 1.832102455 | 1.457510076 | -0.374592379 |
| 217655_at   | LOC100127972 | 3.661397634 | 4.456198764 | 3.649569132 | 4.073067926 | 0.79480113  | 0.423498795 | -0.371302335 |
| 212444_at   | ---          | 6.886924687 | 7.501705164 | 6.902859526 | 7.147114793 | 0.614780477 | 0.244255267 | -0.37052521  |
| 220030_at   | STYK1        | 5.957759357 | 6.596125463 | 5.81648427  | 6.086322242 | 0.638366106 | 0.269837972 | -0.368528133 |
| 212295_s_at | SLC7A1       | 9.097856178 | 10.35089404 | 9.368853225 | 10.26061381 | 1.253037859 | 0.891760582 | -0.361277277 |
| 202695_s_at | STK17A       | 5.077701476 | 5.703210504 | 4.984730446 | 5.251998735 | 0.625509028 | 0.267268289 | -0.358240739 |
| 203723_at   | ITPKB        | 7.012316796 | 8.050603134 | 7.787351944 | 8.469368696 | 1.038286338 | 0.682016752 | -0.356269587 |
| 212110_at   | SLC39A14     | 8.256081201 | 8.881473429 | 8.398881385 | 8.668670241 | 0.625392229 | 0.269788857 | -0.355603372 |
| 211564_s_at | PDLIM4       | 8.171851298 | 8.762111328 | 8.772876254 | 9.010127435 | 0.59026003  | 0.237251181 | -0.353008849 |

|             |            |             |             |             |             |             |             |              |
|-------------|------------|-------------|-------------|-------------|-------------|-------------|-------------|--------------|
| 212190_at   | SERPINE2   | 7.152193864 | 7.740437803 | 7.983240229 | 8.219975081 | 0.588243939 | 0.236734852 | -0.351509087 |
| 202887_s_at | DDIT4      | 8.258191832 | 9.708188437 | 8.553813129 | 9.652333405 | 1.449996605 | 1.098520276 | -0.351476329 |
| 202123_s_at | ABL1       | 8.441767613 | 9.079495854 | 9.136197459 | 9.424996343 | 0.637728241 | 0.288798884 | -0.348929357 |
| 214844_s_at | DOK5       | 6.805299893 | 7.746667834 | 6.755061336 | 7.347706089 | 0.941367941 | 0.592644754 | -0.348723188 |
| 209373_at   | MALL       | 8.496484942 | 9.158880254 | 8.512908763 | 8.829645992 | 0.662395313 | 0.316737229 | -0.345658084 |
| 205770_at   | GSR        | 6.988649993 | 7.955545341 | 6.974578035 | 7.596648486 | 0.966895349 | 0.622070451 | -0.344824897 |
| 204748_at   | PTGS2      | 7.097004713 | 10.20680854 | 7.888435709 | 10.65440501 | 3.109803831 | 2.765969301 | -0.34383453  |
| 204151_x_at | AKR1C1     | 4.319586369 | 5.03676304  | 4.016470886 | 4.389928846 | 0.717176671 | 0.37345796  | -0.343718711 |
| 204194_at   | BACH1      | 4.32878418  | 5.31311595  | 4.490123835 | 5.132959592 | 0.984331769 | 0.642835757 | -0.341496012 |
| 209339_at   | SIAH2      | 6.119008541 | 6.986827869 | 6.452028522 | 6.981785414 | 0.867819327 | 0.529756892 | -0.338062435 |
| 219496_at   | ANKRD57    | 4.296040705 | 4.994692808 | 4.421223931 | 4.783311988 | 0.698652104 | 0.362088057 | -0.336564047 |
| 218871_x_at | CSGALNACT2 | 6.909711186 | 7.670315716 | 7.74361978  | 8.170136883 | 0.76060453  | 0.426517103 | -0.334087426 |
| 217127_at   | CTH        | 3.674204336 | 4.614734359 | 3.518038347 | 4.129364844 | 0.940530023 | 0.611310096 | -0.329219927 |
| 219778_at   | ZFPM2      | 7.061532389 | 7.661242128 | 6.607963161 | 6.880603482 | 0.599709739 | 0.272640322 | -0.327069417 |
| 218647_s_at | YRDC       | 6.069270472 | 6.881682343 | 6.54692332  | 7.036645724 | 0.812411872 | 0.489722404 | -0.322689468 |
| 221904_at   | FAM131A    | 5.064376641 | 5.735914628 | 5.899610511 | 6.250082911 | 0.671537987 | 0.3504724   | -0.321065587 |
| 201041_s_at | DUSP1      | 7.849153795 | 9.407591251 | 8.389343052 | 9.627746798 | 1.558437455 | 1.238403747 | -0.320033708 |
| 213324_at   | SRC        | 5.659005203 | 6.396592323 | 5.794955912 | 6.214850167 | 0.73758712  | 0.419894255 | -0.317692865 |
| 202260_s_at | STXBP1     | 6.907939319 | 7.534379673 | 7.141136646 | 7.451803244 | 0.626440353 | 0.310666598 | -0.315773755 |
| 203192_at   | ABCB6      | 4.620555702 | 5.226521409 | 4.65565643  | 4.948680765 | 0.605965707 | 0.293024335 | -0.312941372 |
| 210756_s_at | NOTCH2     | 5.425334481 | 6.073045502 | 6.056494054 | 6.392148939 | 0.64771102  | 0.335654885 | -0.312056135 |
| 206109_at   | FUT1       | 4.958886603 | 5.677214958 | 5.193218566 | 5.602731865 | 0.718328355 | 0.409513299 | -0.308815056 |
| 205282_at   | LRP8       | 4.468334264 | 5.07413501  | 4.271951763 | 4.574733103 | 0.605800746 | 0.302781341 | -0.303019406 |
| 220027_s_at | RASIP1     | 7.742541041 | 8.386902921 | 7.805644332 | 8.149760169 | 0.644361879 | 0.344115837 | -0.300246043 |
| 212665_at   | TIPARP     | 8.640932028 | 9.41954181  | 9.536352402 | 10.01998109 | 0.778609782 | 0.483628686 | -0.294981096 |
| 200906_s_at | PALLD      | 5.74476219  | 7.56297506  | 5.969141836 | 7.497157284 | 1.81821287  | 1.528015448 | -0.290197422 |
| 221276_s_at | SYNC       | 5.013503141 | 5.753694508 | 4.854274444 | 5.304840979 | 0.740191367 | 0.450566536 | -0.289624832 |
| 206907_at   | TNFSF9     | 3.696716442 | 4.574198979 | 3.78609545  | 4.374562016 | 0.877482537 | 0.588466565 | -0.289015972 |
| 206867_at   | GCKR       | 4.281105858 | 4.89231772  | 4.754836995 | 5.077291068 | 0.611211862 | 0.322454073 | -0.288757788 |
| 215886_x_at | USP12      | 3.864422913 | 4.47796801  | 3.973813077 | 4.298972035 | 0.613545097 | 0.325158958 | -0.288386139 |
| 208916_at   | SLC1A5     | 6.029173844 | 6.793133953 | 6.330595624 | 6.808120171 | 0.763960109 | 0.477524546 | -0.286435562 |
| 211668_s_at | PLAU       | 6.053880153 | 7.24674174  | 5.833346757 | 6.743180772 | 1.192861588 | 0.909834015 | -0.283027573 |
| 210513_s_at | VEGFA      | 3.670938708 | 4.587294381 | 3.787147008 | 4.420561738 | 0.916355673 | 0.63341473  | -0.282940943 |
| 204506_at   | PPP3R1     | 6.880640969 | 7.503735508 | 7.209084483 | 7.550209084 | 0.623094539 | 0.341124601 | -0.281969939 |
| 204141_at   | TUBB2A     | 8.479040055 | 9.399264128 | 8.426143942 | 9.064470241 | 0.920224073 | 0.638326299 | -0.281897774 |
| 202241_at   | TRIB1      | 4.524613826 | 6.659960764 | 5.051607393 | 6.90562254  | 2.135346938 | 1.854015147 | -0.281331791 |
| 214056_at   | ---        | 4.753965266 | 5.601291378 | 4.404827423 | 4.971854631 | 0.847326112 | 0.567027208 | -0.280298904 |
| 33304_at    | ISG20      | 6.100641476 | 6.694455855 | 7.515199708 | 7.83187973  | 0.593814379 | 0.316680022 | -0.277134357 |
| 201464_x_at | JUN        | 9.127609025 | 9.925629682 | 9.476819329 | 9.998178767 | 0.798020658 | 0.521359438 | -0.276661219 |
| 215485_s_at | ICAM1      | 5.948630497 | 6.576678654 | 6.253043131 | 6.604667073 | 0.628048157 | 0.351623943 | -0.276424214 |
| 212290_at   | TRC7A1     | 5.056550354 | 6.351847006 | 5.555100963 | 6.576485316 | 1.295296652 | 1.021384354 | -0.273912298 |
| 212635_at   | SLC1P1     | 9.331534616 | 9.935170375 | 9.224220259 | 9.555104025 | 0.603635759 | 0.330883766 | -0.272751993 |
| 210512_s_at | VEGFA      | 6.3412984   | 7.481072406 | 6.379017202 | 7.250435848 | 1.139774005 | 0.871418645 | -0.26835536  |
| 201324_at   | EMP1       | 10.27336442 | 10.9307417  | 10.59325345 | 10.98295947 | 0.657377275 | 0.38970602  | -0.267671255 |
| 218522_s_at | MAP1S      | 5.479225573 | 6.30271389  | 6.193585913 | 6.749731996 | 0.823488317 | 0.556146083 | -0.267342234 |

|             |        |             |             |             |             |             |             |              |
|-------------|--------|-------------|-------------|-------------|-------------|-------------|-------------|--------------|
| 209193_at   | PIM1   | 3.774072563 | 4.606502718 | 3.805523492 | 4.37083866  | 0.832430154 | 0.565315167 | -0.267114987 |
| 202847_at   | PCK2   | 6.042034131 | 7.393921132 | 6.166758246 | 7.252837652 | 1.351887002 | 1.086079406 | -0.265807596 |
| 202499_s_at | SLC2A3 | 7.038288213 | 7.757684197 | 7.134200744 | 7.590065789 | 0.719395985 | 0.455865046 | -0.263530939 |

**Supplementary Table 6. Gene categories of genes induced by Ox-PAPC by 1.5 fold and the induction was reversed by 1.2 fold by ADAM10 silencing.**

DAVID analysis used for the identification of gene categories.

<http://david.abcc.ncifcrf.gov/home.jsp>

| Category        | Term                                                         | Count | %           | PValue      | Genes      | List Total | Pop Hits | Pop Total | Fold Enrichment | Bonferroni | Benjamini  | FDR        |
|-----------------|--------------------------------------------------------------|-------|-------------|-------------|------------|------------|----------|-----------|-----------------|------------|------------|------------|
| INTERPRO        | IPR004827:Basic-leucine zipper (bZIP) transcription factor   | 8     | 5.673758865 | 1.90E-07    | 201464_X_A | 133        | 53       | 16659     | 18.9065116      | 6.28E-05   | 6.28E-05   | 2.58E-04   |
| SMART           | SM00338:BRLZ                                                 | 8     | 5.673758865 | 3.22E-07    | 201464_X_A | 80         | 53       | 9079      | 17.1301887      | 2.48E-05   | 2.48E-05   | 3.40E-04   |
| SP_PIR_KEYWORDS | Apoptosis                                                    | 14    | 9.929078014 | 3.73E-06    | 204286_S_A | 139        | 381      | 19235     | 5.08487698      | 9.68E-04   | 9.68E-04   | 0.00486897 |
| GOTERM_BP_FAT   | GO:0034097~response to cytokine stimulus                     | 8     | 5.673758865 | 5.86E-06    | 201464_X_A | 120        | 79       | 13528     | 11.4160338      | 0.00770106 | 0.00770106 | 0.00958655 |
| GOTERM_BP_FAT   | GO:0042981~regulation of apoptosis                           | 22    | 15.60283688 | 6.26E-06    | 201464_X_A | 120        | 804      | 13528     | 3.08474295      | 0.0082201  | 0.00411853 | 0.01023531 |
| GOTERM_BP_FAT   | GO:0043067~regulation of programmed cell death               | 22    | 15.60283688 | 7.29E-06    | 201464_X_A | 120        | 812      | 13528     | 3.0543514       | 0.00956886 | 0.00319985 | 0.01192273 |
| GOTERM_BP_FAT   | GO:0010941~regulation of cell death                          | 22    | 15.60283688 | 7.71E-06    | 201464_X_A | 120        | 815      | 13528     | 3.04310838      | 0.01012409 | 0.00254069 | 0.01261802 |
| UP_SEQ_FEATURE  | domain:Leucine zipper                                        | 8     | 5.673758865 | 1.50E-05    | 201464_X_A | 139        | 110      | 19113     | 10.0002616      | 0.00791362 | 0.00791362 | 0.02183266 |
| UP_SEQ_FEATURE  | DNA-binding region:Basic motif                               | 9     | 6.382978723 | 2.24E-05    | 201464_X_A | 139        | 161      | 19113     | 7.68653649      | 0.01174156 | 0.00588811 | 0.0324543  |
| GOTERM_BP_FAT   | GO:0006915~apoptosis                                         | 17    | 12.05673759 | 7.35E-05    | 201464_X_A | 120        | 602      | 13528     | 3.18349945      | 0.09236307 | 0.01919554 | 0.12010665 |
| GOTERM_BP_FAT   | GO:0012501~programmed cell death                             | 17    | 12.05673759 | 8.75E-05    | 201464_X_A | 120        | 611      | 13528     | 3.13660666      | 0.10894788 | 0.01904176 | 0.14294565 |
| GOTERM_BP_FAT   | GO:0043065~positive regulation of apoptosis                  | 14    | 9.929078014 | 1.03E-04    | 201464_X_A | 120        | 430      | 13528     | 3.6703876       | 0.12732618 | 0.01926815 | 0.16875029 |
| GOTERM_BP_FAT   | GO:0060323~head morphogenesis                                | 4     | 2.836879433 | 1.04E-04    | 202310_S_A | 120        | 11       | 13528     | 40.9939394      | 0.12820854 | 0.01700439 | 0.17000265 |
| GOTERM_BP_FAT   | GO:0043068~positive regulation of programmed cell death      | 14    | 9.929078014 | 1.11E-04    | 201464_X_A | 120        | 433      | 13528     | 3.64495766      | 0.13584357 | 0.01609151 | 0.18089194 |
| GOTERM_BP_FAT   | GO:0010942~positive regulation of cell death                 | 14    | 9.929078014 | 1.16E-04    | 201464_X_A | 120        | 435      | 13528     | 3.62819923      | 0.1417629  | 0.01517123 | 0.18939983 |
| GOTERM_BP_FAT   | GO:0042542~response to hydrogen peroxide                     | 6     | 4.255319149 | 1.29E-04    | 201464_X_A | 120        | 56       | 13528     | 12.0785714      | 0.15673491 | 0.01537816 | 0.2111806  |
| GOTERM_BP_FAT   | GO:0009991~response to extracellular stimulus                | 10    | 7.092198582 | 1.39E-04    | 201464_X_A | 120        | 220      | 13528     | 5.12424242      | 0.16749542 | 0.01516029 | 0.22707181 |
| GOTERM_BP_FAT   | GO:0060322~head development                                  | 4     | 2.836879433 | 2.25E-04    | 202310_S_A | 120        | 14       | 13528     | 32.2095238      | 0.25689396 | 0.02258088 | 0.36752776 |
| GOTERM_BP_FAT   | GO:0010171~body morphogenesis                                | 4     | 2.836879433 | 2.25E-04    | 202310_S_A | 120        | 14       | 13528     | 32.2095238      | 0.25689396 | 0.02258088 | 0.36752776 |
| GOTERM_MF_FAT   | GO:0046983~protein dimerization activity                     | 15    | 10.63829787 | 2.30E-04    | 201464_X_A | 113        | 542      | 12983     | 3.17971786      | 0.07894881 | 0.07894881 | 0.31474191 |
| GOTERM_BP_FAT   | GO:0031667~response to nutrient levels                       | 9     | 6.382978723 | 3.46E-04    | 201464_X_A | 120        | 197      | 13528     | 5.15025381      | 0.36669669 | 0.03210273 | 0.56488711 |
| GOTERM_BP_FAT   | GO:0051591~response to cAMP                                  | 5     | 3.546099291 | 4.92E-04    | 201464_X_A | 120        | 42       | 13528     | 13.4206349      | 0.47759999 | 0.04236456 | 0.80198758 |
| GOTERM_BP_FAT   | GO:0000302~response to reactive oxygen species               | 6     | 4.255319149 | 5.11E-04    | 201464_X_A | 120        | 75       | 13528     | 9.01866667      | 0.49066226 | 0.04128866 | 0.83313285 |
| GOTERM_BP_FAT   | GO:0008219~cell death                                        | 17    | 12.05673759 | 5.50E-04    | 201464_X_A | 120        | 719      | 13528     | 2.66546129      | 0.51582032 | 0.04176733 | 0.89540729 |
| GOTERM_BP_FAT   | GO:0048008~platelet-derived growth factor receptor signaling | 4     | 2.836879433 | 5.80E-04    | 210513_S_A | 120        | 19       | 13528     | 23.7333333      | 0.53493512 | 0.04164033 | 0.94489767 |
| GOTERM_BP_FAT   | GO:0016265~death                                             | 17    | 12.05673759 | 5.93E-04    | 201464_X_A | 120        | 724      | 13528     | 2.64705341      | 0.54247795 | 0.04031888 | 0.96498187 |
| GOTERM_BP_FAT   | GO:0006979~response to oxidative stress                      | 8     | 5.673758865 | 6.08E-04    | 201464_X_A | 120        | 164      | 13528     | 5.49918699      | 0.5519358  | 0.03934596 | 0.99063237 |
| SP_PIR_KEYWORDS | amino-acid biosynthesis                                      | 4     | 2.836879433 | 6.55E-04    | 220346_AT, | 139        | 24       | 19235     | 23.0635492      | 0.15660526 | 0.08163474 | 0.85260225 |
| SP_PIR_KEYWORDS | phosphoprotein                                               | 71    | 50.35460993 | 0.001253808 | 201464_X_A | 139        | 7263     | 19235     | 1.3527567       | 0.2783353  | 0.10302883 | 1.62651915 |
| GOTERM_BP_FAT   | GO:0007584~response to nutrient                              | 7     | 4.964539007 | 0.001470267 | 204341_AT, | 120        | 140      | 13528     | 5.63666667      | 0.85639798 | 0.08827306 | 2.37793556 |
| SP_PIR_KEYWORDS | cytoplasm                                                    | 39    | 27.65957447 | 0.001817295 | 200906_S_A | 139        | 3332     | 19235     | 1.61970903      | 0.37682412 | 0.11150976 | 2.34952192 |
| GOTERM_BP_FAT   | GO:0010035~response to inorganic substance                   | 8     | 5.673758865 | 0.002218351 | 201464_X_A | 120        | 205      | 13528     | 4.39934959      | 0.94656318 | 0.12466444 | 3.56737016 |
| GOTERM_BP_FAT   | GO:0006916~anti-apoptosis                                    | 8     | 5.673758865 | 0.002279969 | 206665_S_A | 120        | 206      | 13528     | 4.37799353      | 0.95074344 | 0.12269498 | 3.66473239 |
| GOTERM_BP_FAT   | GO:0042592~homeostatic process                               | 16    | 11.34751773 | 0.002411241 | 201464_X_A | 120        | 751      | 13528     | 2.40177541      | 0.95859141 | 0.12425278 | 3.87184574 |
| GOTERM_BP_FAT   | GO:0060325~face morphogenesis                                | 3     | 2.127659574 | 0.002653079 | 202310_S_A | 120        | 9        | 13528     | 37.5777778      | 0.969925   | 0.13078297 | 4.25231133 |
| UP_SEQ_FEATURE  | site:Lowest pKa of active site Tyr                           | 3     | 2.127659574 | 0.003257675 | 206561_S_A | 139        | 12       | 19113     | 34.3758993      | 0.82144527 | 0.43689361 | 4.62448914 |
| INTERPRO        | IPR018170:Aldo/keto reductase, conserved site                | 3     | 2.127659574 | 0.003270365 | 206561_S_A | 139        | 11       | 16659     | 34.1606288      | 0.66074016 | 0.41753984 | 4.3437673  |
| GOTERM_BP_FAT   | GO:0009396~folic acid and derivative biosynthetic process    | 3     | 2.127659574 | 0.003297314 | 201761_AT, | 120        | 10       | 13528     | 33.82           | 0.9871748  | 0.15426708 | 5.25895042 |
| UP_SEQ_FEATURE  | domain:CH                                                    | 4     | 2.836879433 | 0.003441371 | 204823_AT, | 139        | 42       | 19113     | 13.0955807      | 0.83800302 | 0.3655802  | 4.87923187 |
| GOTERM_BP_FAT   | GO:0042127~regulation of cell proliferation                  | 16    | 11.34751773 | 0.003754173 | 220049_S_A | 120        | 787      | 13528     | 2.29191021      | 0.99299458 | 0.16785069 | 5.96677604 |
| INTERPRO        | IPR013322:TRAF-type                                          | 3     | 2.127659574 | 0.003904131 | 205599_AT, | 133        | 12       | 16659     | 31.3139098      | 0.72497269 | 0.34968275 | 5.16506217 |
| GOTERM_BP_FAT   | GO:0060324~face development                                  | 3     | 2.127659574 | 0.004006936 | 202310_S_A | 120        | 11       | 13528     | 30.7454545      | 0.99498722 | 0.1723248  | 6.35625373 |
| GOTERM_BP_FAT   | GO:0043066~negative regulation of apoptosis                  | 10    | 7.092198582 | 0.004024788 | 210118_S_A | 120        | 354      | 13528     | 3.18455744      | 0.99510434 | 0.16758804 | 6.38370405 |
| GOTERM_BP_FAT   | GO:0042035~regulation of cytokine biosynthetic process       | 5     | 3.546099291 | 0.004077961 | 216493_S_A | 120        | 74       | 13528     | 7.61711712      | 0.99543724 | 0.16444653 | 6.46542267 |
| GOTERM_BP_FAT   | GO:0043069~negative regulation of programmed cell death      | 10    | 7.092198582 | 0.00440947  | 210118_S_A | 120        | 359      | 13528     | 3.14020427      | 0.99705884 | 0.17141072 | 6.97338494 |
| GOTERM_BP_FAT   | GO:0060548~negative regulation of cell death                 | 10    | 7.092198582 | 0.004489746 | 210118_S_A | 120        | 360      | 13528     | 3.13148148      | 0.99735559 | 0.16929323 | 7.09600058 |
| GOTERM_BP_FAT   | GO:0008285~negative regulation of cell proliferation         | 10    | 7.092198582 | 0.004571161 | 201464_X_A | 120        | 361      | 13528     | 3.12280702      | 0.99762601 | 0.16733743 | 7.22020039 |
| GOTERM_BP_FAT   | GO:0032496~response to lipopolysaccharide                    | 5     | 3.546099291 | 0.004700616 | 201464_X_A | 120        | 77       | 13528     | 7.32034632      | 0.99800025 | 0.16705378 | 7.41736458 |
| GOTERM_BP_FAT   | GO:0001570~vasculogenesis                                    | 4     | 2.836879433 | 0.005546531 | 219778_AT, | 120        | 41       | 13528     | 10.998374       | 0.9993485  | 0.18909697 | 8.6960692  |
| GOTERM_BP_FAT   | GO:0040007~growth                                            | 7     | 4.964539007 | 0.00555264  | 201325_S_A | 120        | 183      | 13528     | 4.31220401      | 0.99935376 | 0.18454536 | 8.70524382 |

|                 |                                                               |    |             |             |             |     |      |       |             |            |            |            |
|-----------------|---------------------------------------------------------------|----|-------------|-------------|-------------|-----|------|-------|-------------|------------|------------|------------|
| GOTERM_BP_FAT   | GO:0009309~amine biosynthetic process                         | 5  | 3.546099291 | 0.005626152 | 220346_AT,: | 120 | 81   | 13528 | 6.95884774  | 0.9994130  | 0.18219476 | 8.81556978 |
| GOTERM_BP_FAT   | GO:0001568~blood vessel development                           | 8  | 5.673758865 | 0.00590119  | 201464_X_A' | 120 | 245  | 13528 | 3.68108844  | 0.9995938  | 0.18571119 | 9.22723152 |
| INTERPRO        | IPR011700:Basic leucine zipper                                | 3  | 2.127659574 | 0.006115319 | 212501_AT,: | 133 | 15   | 16659 | 25.0511278  | 0.86790726 | 0.39713547 | 7.97965999 |
| GOTERM_BP_FAT   | GO:0045604~regulation of epidermal cell differentiation       | 3  | 2.127659574 | 0.006516389 | 204970_S_A' | 120 | 14   | 13528 | 24.1571429  | 0.99982012 | 0.19837055 | 10.1417216 |
| UP_SEQ_FEATURE  | short sequence motif:BH3                                      | 3  | 2.127659574 | 0.006556105 | 206665_S_A' | 139 | 17   | 19113 | 24.2653407  | 0.96897682 | 0.50072793 | 9.10334254 |
| GOTERM_BP_FAT   | GO:0031960~response to corticosteroid stimulus                | 5  | 3.546099291 | 0.006666146 | 204420_AT,: | 120 | 85   | 13528 | 6.63137255  | 0.99985256 | 0.19792415 | 10.3630218 |
| GOTERM_BP_FAT   | GO:0001944~vasculature development                            | 8  | 5.673758865 | 0.006710954 | 201464_X_A' | 120 | 251  | 13528 | 3.59309429  | 0.99986108 | 0.19476732 | 10.4291368 |
| GOTERM_CC_FAT   | GO:0031968~organelle outer membrane                           | 5  | 3.546099291 | 0.006941353 | 206665_S_A' | 94  | 104  | 12782 | 6.53743863  | 0.67419444 | 0.67419444 | 8.07505517 |
| GOTERM_BP_FAT   | GO:0002237~response to molecule of bacterial origin           | 5  | 3.546099291 | 0.006944706 | 201464_X_A' | 120 | 86   | 13528 | 6.55426357  | 0.99989815 | 0.19656393 | 10.7732972 |
| KEGG_PATHWAY    | hsa05200:Pathways in cancer                                   | 10 | 7.092198582 | 0.006959558 | 201464_X_A' | 55  | 328  | 5085  | 2.81873614  | 0.46663539 | 0.46663539 | 7.31614976 |
| GOTERM_CC_FAT   | GO:0005886~plasma membrane                                    | 40 | 28.36879433 | 0.007156844 | 216959_X_A' | 94  | 3777 | 12782 | 1.4400712   | 0.68538166 | 0.4390915  | 8.31588553 |
| GOTERM_BP_FAT   | GO:0031328~positive regulation of cellular biosynthetic proce | 14 | 9.929078014 | 0.007169347 | 201464_X_A' | 120 | 685  | 13528 | 2.30403893  | 0.99992443 | 0.19804891 | 11.1028738 |
| GOTERM_BP_FAT   | GO:0048660~regulation of smooth muscle cell proliferation     | 4  | 2.836879433 | 0.007651392 | 201464_X_A' | 120 | 46   | 13528 | 9.80289855  | 0.99996017 | 0.2056649  | 11.8062411 |
| INTERPRO        | IPR001395:Aldo/keto reductase                                 | 3  | 2.127659574 | 0.007839264 | 206561_S_A' | 133 | 17   | 16659 | 22.1039363  | 0.92551447 | 0.40514052 | 10.1201557 |
| GOTERM_CC_FAT   | GO:0019867~outer membrane                                     | 5  | 3.546099291 | 0.007914466 | 206665_S_A' | 94  | 108  | 12782 | 6.29531127  | 0.72177625 | 0.34717306 | 9.15821993 |
| GOTERM_BP_FAT   | GO:0009891~positive regulation of biosynthetic process        | 14 | 9.929078014 | 0.008053861 | 201464_X_A' | 120 | 695  | 13528 | 2.27088729  | 0.99997668 | 0.21102715 | 12.3894892 |
| GOTERM_BP_FAT   | GO:0006760~follic acid and derivative metabolic process       | 3  | 2.127659574 | 0.008495052 | 201761_AT,: | 120 | 16   | 13528 | 21.1375     | 0.99998703 | 0.21700339 | 13.0246912 |
| GOTERM_MF_FAT   | GO:0042802~identical protein binding                          | 13 | 9.219858156 | 0.00907454  | 210513_S_A' | 113 | 640  | 12983 | 2.33378042  | 0.96174631 | 0.8044145  | 11.7587777 |
| GOTERM_MF_FAT   | GO:0046982~protein heterodimerization activity                | 7  | 4.964539007 | 0.009236202 | 206665_S_A' | 113 | 208  | 12983 | 3.86661845  | 0.96391669 | 0.66955278 | 11.9561234 |
| GOTERM_BP_FAT   | GO:0044272~sulfur compound biosynthetic process               | 4  | 2.836879433 | 0.00963183  | 218871_X_A' | 120 | 50   | 13528 | 9.01866667  | 0.99999714 | 0.2378533  | 14.6414958 |
| GOTERM_BP_FAT   | GO:0008652~cellular amino acid biosynthetic process           | 4  | 2.836879433 | 0.010169196 | 220346_AT,: | 120 | 51   | 13528 | 8.84183007  | 0.9999986  | 0.24487469 | 15.3959129 |
| GOTERM_BP_FAT   | GO:0010033~response to organic substance                      | 14 | 9.929078014 | 0.010762345 | 201464_X_A' | 120 | 721  | 13528 | 2.18899676  | 0.99999937 | 0.25268985 | 16.2213755 |
| SP_PIR_KEYWORDS | alternative initiation                                        | 4  | 2.836879433 | 0.010944619 | 209193_AT,: | 139 | 64   | 19235 | 8.64883094  | 0.94280492 | 0.43574978 | 13.3979509 |
| GOTERM_BP_FAT   | GO:0016477~cell migration                                     | 8  | 5.673758865 | 0.01098828  | 205282_AT,: | 120 | 276  | 13528 | 3.26763285  | 0.99999954 | 0.25304963 | 16.5483662 |
| KEGG_PATHWAY    | hsa05222:Small cell lung cancer                               | 5  | 3.546099291 | 0.011708076 | 206665_S_A' | 55  | 84   | 5085  | 5.50324675  | 0.65352478 | 0.41137854 | 12.025278  |
| GOTERM_BP_FAT   | GO:0010557~positive regulation of macromolecule biosynthe     | 13 | 9.219858156 | 0.012438646 | 201464_X_A' | 120 | 654  | 13528 | 2.24087666  | 0.99999996 | 0.27654361 | 18.5135236 |
| SP_PIR_KEYWORDS | activator                                                     | 10 | 7.092198582 | 0.012779561 | 204194_AT,: | 139 | 520  | 19235 | 2.66117875  | 0.96470803 | 0.4272752  | 15.4747043 |
| GOTERM_BP_FAT   | GO:0051090~regulation of transcription factor activity        | 5  | 3.546099291 | 0.012908204 | 209193_AT,: | 120 | 103  | 13528 | 5.47249191  | 0.99999996 | 0.28075493 | 19.1449545 |
| INTERPRO        | IPR000712:Apoptosis regulator Bcl-2, BH                       | 3  | 2.127659574 | 0.012975959 | 206665_S_A' | 133 | 22   | 16659 | 17.0803144  | 0.98656768 | 0.51244323 | 16.2276957 |
| GOTERM_BP_FAT   | GO:0009612~response to mechanical stimulus                    | 4  | 2.836879433 | 0.013114639 | 201464_X_A' | 120 | 56   | 13528 | 8.05238095  | 0.99999997 | 0.28002615 | 19.4210989 |
| GOTERM_CC_FAT   | GO:0009986~cell surface                                       | 8  | 5.673758865 | 0.013389931 | 216959_X_A' | 94  | 348  | 12782 | 3.12594766  | 0.88586142 | 0.41875649 | 15.0363991 |
| GOTERM_BP_FAT   | GO:0045787~positive regulation of cell cycle                  | 4  | 2.836879433 | 0.013756033 | 209193_AT,: | 120 | 57   | 13528 | 7.91111111  | 0.99999999 | 0.28704452 | 20.2734399 |
| GOTERM_BP_FAT   | GO:0050805~negative regulation of synaptic transmission       | 3  | 2.127659574 | 0.014447149 | 204748_AT,: | 120 | 21   | 13528 | 16.10447619 | 1          | 0.29460406 | 21.1823778 |
| GOTERM_BP_FAT   | GO:0001836~release of cytochrome c from mitochondria          | 3  | 2.127659574 | 0.014447149 | 201464_X_A' | 120 | 21   | 13528 | 16.10447619 | 1          | 0.29460406 | 21.1823778 |
| GOTERM_CC_FAT   | GO:0005829~cytosol                                            | 18 | 12.76595745 | 0.014674964 | 201464_X_A' | 94  | 1330 | 12782 | 1.84031355  | 0.90746577 | 0.37875847 | 16.3644437 |
| GOTERM_BP_FAT   | GO:0048878~chemical homeostasis                               | 11 | 7.80141844  | 0.014798762 | 201464_X_A' | 120 | 512  | 13528 | 2.42200521  | 1          | 0.29613491 | 21.6410666 |
| SMART           | SM00337:BCL                                                   | 3  | 2.127659574 | 0.015429169 | 206665_S_A' | 80  | 22   | 9079  | 15.4755682  | 0.69799349 | 0.45044881 | 15.1305289 |
| GOTERM_MF_FAT   | GO:0043565~sequence-specific DNA binding                      | 12 | 8.510638298 | 0.015585281 | 204194_AT,: | 113 | 607  | 12983 | 2.27137671  | 0.9963879  | 0.75484552 | 19.3907535 |
| INTERPRO        | IPR004978:Stanniocalcin                                       | 2  | 1.418439716 | 0.015784978 | 203439_S_A' | 133 | 2    | 16659 | 125.255639  | 0.99475559 | 0.52767344 | 19.4027404 |
| GOTERM_BP_FAT   | GO:0045682~regulation of epidermis development                | 3  | 2.127659574 | 0.015801403 | 204970_S_A' | 120 | 22   | 13528 | 15.3727273  | 1          | 0.308277   | 22.9353179 |
| GOTERM_MF_FAT   | GO:0004487~methylenetetrahydrofolate dehydrogenase (NAI       | 2  | 1.418439716 | 0.017179571 | 201761_AT,: | 113 | 2    | 12983 | 114.893805  | 0.99797812 | 0.71083152 | 21.1639044 |
| GOTERM_BP_FAT   | GO:0030097~hemopoiesis                                        | 7  | 4.964539007 | 0.017937327 | 202443_X_A' | 120 | 236  | 13528 | 3.34378531  | 1          | 0.33742558 | 25.6258379 |
| GOTERM_BP_FAT   | GO:0010243~response to organic nitrogen                       | 4  | 2.836879433 | 0.017975821 | 206665_S_A' | 120 | 63   | 13528 | 7.15767196  | 1          | 0.3333713  | 25.6735083 |
| INTERPRO        | IPR001715:Calponin-like actin-binding                         | 4  | 2.836879433 | 0.018100903 | 204823_AT,: | 133 | 70   | 16659 | 7.15746509  | 0.99758974 | 0.52928505 | 21.9362142 |
| GOTERM_BP_FAT   | GO:0006790~sulfur metabolic process                           | 5  | 3.546099291 | 0.018636663 | 218871_X_A' | 120 | 115  | 13528 | 4.90144928  | 1          | 0.33870931 | 26.4874176 |
| GOTERM_BP_FAT   | GO:0001101~response to acid                                   | 3  | 2.127659574 | 0.018665497 | 209878_S_A' | 120 | 24   | 13528 | 14.09166667 | 1          | 0.33463359 | 26.5227399 |
| GOTERM_BP_FAT   | GO:0051674~localization of cell                               | 8  | 5.673758865 | 0.01873381  | 205282_AT,: | 120 | 307  | 13528 | 2.93767644  | 1          | 0.33123807 | 26.6063591 |
| GOTERM_BP_FAT   | GO:0048870~cell motility                                      | 8  | 5.673758865 | 0.01873381  | 205282_AT,: | 120 | 307  | 13528 | 2.93767644  | 1          | 0.33123807 | 26.6063591 |
| GOTERM_BP_FAT   | GO:0001701~in utero embryonic development                     | 6  | 4.255319149 | 0.019587846 | 206665_S_A' | 120 | 176  | 13528 | 3.84318182  | 1          | 0.33911195 | 27.6442396 |
| GOTERM_BP_FAT   | GO:0051970~negative regulation of transmission of nerve imp   | 3  | 2.127659574 | 0.020173338 | 204748_AT,: | 120 | 25   | 13528 | 13.528      | 1          | 0.34296026 | 28.3477895 |
| GOTERM_BP_FAT   | GO:0033273~response to vitamin                                | 4  | 2.836879433 | 0.020326342 | 204341_AT,: | 120 | 66   | 13528 | 6.83232323  | 1          | 0.34079326 | 28.5305846 |
| GOTERM_CC_FAT   | GO:0045121~membrane raft                                      | 5  | 3.546099291 | 0.020376459 | 205282_AT,: | 94  | 143  | 12782 | 4.75450082  | 0.96364758 | 0.42444229 | 22.0302427 |
| UP_SEQ_FEATURE  | domain:Protein kinase                                         | 9  | 6.382978723 | 0.020654267 | 209193_AT,: | 139 | 469  | 19113 | 2.63866178  | 0.99998362 | 0.84064301 | 26.1287517 |
| UP_SEQ_FEATURE  | binding site:Substrate                                        | 7  | 4.964539007 | 0.020930356 | 203723_AT,: | 139 | 297  | 19113 | 3.24082552  | 0.99998589 | 0.79719349 | 26.4303644 |
| GOTERM_CC_FAT   | GO:0044421~extracellular region part                          | 14 | 9.929078014 | 0.021299485 | 205282_AT,: | 94  | 960  | 12782 | 1.98302305  | 0.96876651 | 0.39053918 | 22.9136442 |

|                 |             |                                                   |    |             |             |            |     |       |       |             |            |            |            |
|-----------------|-------------|---------------------------------------------------|----|-------------|-------------|------------|-----|-------|-------|-------------|------------|------------|------------|
| GOTERM_BP_FAT   | GO:0019725  | cellular homeostasis                              | 10 | 7.092198582 | 0.021734061 | 201464_X_A | 120 | 466   | 13528 | 2.41917024  | 1          | 0.35541048 | 30.1919662 |
| GOTERM_BP_FAT   | GO:0042325  | regulation of phosphorylation                     | 10 | 7.092198582 | 0.021734061 | 201464_X_A | 120 | 466   | 13528 | 2.41917024  | 1          | 0.35541048 | 30.1919662 |
| GOTERM_BP_FAT   | GO:0001817  | regulation of cytokine production                 | 6  | 4.255319149 | 0.021809995 | 204341_AT, | 120 | 181   | 13528 | 3.73701657  | 1          | 0.35216248 | 30.2805435 |
| GOTERM_BP_FAT   | GO:0051101  | regulation of DNA binding                         | 5  | 3.546099291 | 0.022008514 | 209193_AT, | 120 | 121   | 13528 | 4.6584022   | 1          | 0.35057522 | 30.5116208 |
| GOTERM_BP_FAT   | GO:0014070  | response to organic cyclic substance              | 5  | 3.546099291 | 0.022008514 | 201464_X_A | 120 | 121   | 13528 | 4.6584022   | 1          | 0.35057522 | 30.5116208 |
| GOTERM_BP_FAT   | GO:0010648  | negative regulation of cell communication         | 7  | 4.964539007 | 0.022280942 | 202241_AT, | 120 | 248   | 13528 | 3.18198925  | 1          | 0.34997069 | 30.8275566 |
| SMART           | SM00033     | CH                                                | 4  | 2.836879433 | 0.022874514 | 204823_AT, | 80  | 70    | 9079  | 6.485       | 0.83166429 | 0.44784787 | 21.6624174 |
| GOTERM_BP_FAT   | GO:0006917  | induction of apoptosis                            | 8  | 5.673758865 | 0.022903354 | 202443_X_A | 120 | 320   | 13528 | 2.81833333  | 1          | 0.3537595  | 31.5443202 |
| GOTERM_BP_FAT   | GO:0060348  | bone development                                  | 5  | 3.546099291 | 0.023210021 | 202310_S_A | 120 | 123   | 13528 | 4.58265583  | 1          | 0.35355427 | 31.8949039 |
| GOTERM_BP_FAT   | GO:0012502  | induction of programmed cell death                | 8  | 5.673758865 | 0.023248651 | 202443_X_A | 120 | 321   | 13528 | 2.80955348  | 1          | 0.35009644 | 31.9389468 |
| GOTERM_BP_FAT   | GO:0006928  | cell motion                                       | 10 | 7.092198582 | 0.024228179 | 205282_AT, | 120 | 475   | 13528 | 2.37333333  | 1          | 0.35799364 | 33.0468199 |
| SP_PIR_KEYWORDS |             | transforming protein                              | 3  | 2.127659574 | 0.024677591 | 209193_AT, | 139 | 34    | 19235 | 12.2101143  | 0.99849154 | 0.60469415 | 27.8634807 |
| INTERPRO        | IPR011616   | bZIP transcription factor, bZIP-1                 | 3  | 2.127659574 | 0.024939854 | 201464_X_A | 133 | 31    | 16659 | 12.1215135  | 0.99975992 | 0.60388781 | 28.9935772 |
| GOTERM_BP_FAT   | GO:0031645  | negative regulation of neurological system proci  | 3  | 2.127659574 | 0.024988306 | 204748_AT, | 120 | 28    | 13528 | 12.0785714  | 1          | 0.36304677 | 33.8948547 |
| SP_PIR_KEYWORDS |             | Proto-oncogene                                    | 6  | 4.255319149 | 0.025222759 | 209193_AT, | 139 | 230   | 19235 | 3.60994683  | 0.99869564 | 0.56406185 | 28.388753  |
| UP_SEQ_FEATURE  |             | sequence variant                                  | 99 | 70.21276596 | 0.02539328  | 201464_X_A | 139 | 11992 | 19113 | 1.13516145  | 0.99999874 | 0.616878   | 31.1495654 |
| GOTERM_MF_FAT   | GO:0004486  | methylenetetrahydrofolate dehydrogenase acti      | 2  | 1.418439716 | 0.02565934  | 201761_AT, | 113 | 3     | 12983 | 76.5958702  | 0.99990912 | 0.78796252 | 30.0026387 |
| GOTERM_MF_FAT   | GO:0004477  | methylenetetrahydrofolate cyclohydrolase activit  | 2  | 1.418439716 | 0.02565934  | 201761_AT, | 113 | 3     | 12983 | 76.5958702  | 0.99990912 | 0.78796252 | 30.0026387 |
| GOTERM_MF_FAT   | GO:0016645  | oxidoreductase activity, acting on the CH-NH gr   | 3  | 2.127659574 | 0.025733068 | 201761_AT, | 113 | 29    | 12983 | 11.8855661  | 0.99991155 | 0.73639197 | 30.0752883 |
| PIR_SUPERFAMILY | PIRSF015614 | TNF receptor-associated factor (TRAF)             | 2  | 1.418439716 | 0.025739436 | 205599_AT, | 65  | 3     | 7396  | 75.8564103  | 0.86918437 | 0.86918437 | 24.105961  |
| PIR_SUPERFAMILY | PIRSF037826 | transcription factor MafK                         | 2  | 1.418439716 | 0.025739436 | 204970_S_A | 65  | 3     | 7396  | 75.8564103  | 0.86918437 | 0.86918437 | 24.105961  |
| GOTERM_BP_FAT   | GO:0032227  | negative regulation of synaptic transmission, do  | 2  | 1.418439716 | 0.026160169 | 204748_AT, | 120 | 3     | 13528 | 75.1555556  | 1          | 0.37261505 | 35.1825067 |
| GOTERM_BP_FAT   | GO:0051173  | positive regulation of nitrogen compound metal    | 12 | 8.510638298 | 0.026344518 | 201464_X_A | 120 | 644   | 13528 | 2.10662112  | 1          | 0.37082543 | 35.3829148 |
| GOTERM_BP_FAT   | GO:0048511  | rhythmic process                                  | 5  | 3.546099291 | 0.026386103 | 201464_X_A | 120 | 128   | 13528 | 4.40364583  | 1          | 0.3674909  | 35.428042  |
| GOTERM_BP_FAT   | GO:0009719  | response to endogenous stimulus                   | 9  | 6.382978723 | 0.026520151 | 206665_S_A | 120 | 405   | 13528 | 2.50518519  | 1          | 0.36524519 | 35.5733058 |
| SP_PIR_KEYWORDS |             | kinase                                            | 11 | 7.80141844  | 0.02658308  | 211924_S_A | 139 | 688   | 19235 | 2.1249163   | 0.99909278 | 0.54083586 | 29.6840654 |
| GOTERM_CC_FAT   | GO:0005615  | extracellular space                               | 11 | 7.80141844  | 0.026899712 | 205282_AT, | 94  | 685   | 12782 | 2.18359994  | 0.98760137 | 0.42234076 | 28.0795683 |
| GOTERM_BP_FAT   | GO:0051174  | regulation of phosphorus metabolic process        | 10 | 7.092198582 | 0.027232917 | 201464_X_A | 120 | 485   | 13528 | 2.32439863  | 1          | 0.36934244 | 36.3405712 |
| GOTERM_BP_FAT   | GO:0019220  | regulation of phosphate metabolic process         | 10 | 7.092198582 | 0.027232917 | 201464_X_A | 120 | 485   | 13528 | 2.32439863  | 1          | 0.36934244 | 36.3405712 |
| GOTERM_BP_FAT   | GO:0048545  | response to steroid hormone stimulus              | 6  | 4.255319149 | 0.027261107 | 204420_AT, | 120 | 192   | 13528 | 3.52291667  | 1          | 0.36600085 | 36.3707402 |
| GOTERM_BP_FAT   | GO:0048534  | hemopoietic or lymphoid organ development         | 7  | 4.964539007 | 0.027286377 | 202443_X_A | 120 | 260   | 13528 | 3.03512821  | 1          | 0.36269356 | 36.3977714 |
| GOTERM_CC_FAT   | GO:0005741  | mitochondrial outer membrane                      | 4  | 2.836879433 | 0.027804736 | 206665_S_A | 94  | 90    | 12782 | 6.04349882  | 0.98932633 | 0.39615741 | 28.883949  |
| GOTERM_BP_FAT   | GO:0007566  | embryo implantation                               | 3  | 2.127659574 | 0.028431648 | 203542_S_A | 120 | 30    | 13528 | 11.27333333 | 1          | 0.37121177 | 37.6116461 |
| GOTERM_MF_FAT   | GO:0016814  | hydrolase activity, acting on carbon-nitrogen (bu | 3  | 2.127659574 | 0.029146605 | 201761_AT, | 113 | 31    | 12983 | 11.1187554  | 0.99997482 | 0.73385029 | 33.3633738 |
| GOTERM_BP_FAT   | GO:0048661  | positive regulation of smooth muscle cell prolif  | 3  | 2.127659574 | 0.030220542 | 201464_X_A | 120 | 31    | 13528 | 10.9096774  | 1          | 0.3859372  | 39.4642613 |
| GOTERM_BP_FAT   | GO:0008637  | apoptotic mitochondrial changes                   | 3  | 2.127659574 | 0.030220542 | 201464_X_A | 120 | 31    | 13528 | 10.9096774  | 1          | 0.3859372  | 39.4642613 |
| SP_PIR_KEYWORDS |             | polymorphism                                      | 95 | 67.37588652 | 0.030566838 | 201464_X_A | 139 | 11550 | 19235 | 1.13820113  | 0.99968765 | 0.55386667 | 33.35403   |
| INTERPRO        | IPR000672   | Tetrahydrofolate dehydrogenase/cyclohydrolase     | 2  | 1.418439716 | 0.031322648 | 201761_AT, | 133 | 4     | 16659 | 62.6278195  | 0.99997251 | 0.65012588 | 35.0425066 |
| GOTERM_BP_FAT   | GO:0042246  | tissue regeneration                               | 3  | 2.127659574 | 0.032053041 | 202443_X_A | 120 | 32    | 13528 | 10.56875    | 1          | 0.40043565 | 41.3083955 |
| GOTERM_BP_FAT   | GO:0045859  | regulation of protein kinase activity             | 8  | 5.673758865 | 0.032649441 | 209193_AT, | 120 | 345   | 13528 | 2.61410628  | 1          | 0.40255787 | 41.8971153 |
| GOTERM_MF_FAT   | GO:0008134  | transcription factor binding                      | 10 | 7.092198582 | 0.033155749 | 209193_AT, | 113 | 513   | 12983 | 2.23964533  | 0.99999428 | 0.73847399 | 37.0419301 |
| GOTERM_MF_FAT   | GO:0047115  | trans-1,2-dihydrobenzene-1,2-diol dehydrogena     | 2  | 1.418439716 | 0.034066594 | 209699_X_A | 113 | 4     | 12983 | 57.4469027  | 0.99999592 | 0.71085928 | 37.8509873 |
| GOTERM_BP_FAT   | GO:0046683  | response to organophosphorus                      | 2  | 1.418439716 | 0.034728519 | 204341_AT, | 120 | 4     | 13528 | 56.3666667  | 1          | 0.41847849 | 43.9063562 |
| GOTERM_BP_FAT   | GO:0002520  | immune system development                         | 7  | 4.964539007 | 0.035049545 | 202443_X_A | 120 | 276   | 13528 | 2.85917874  | 1          | 0.41778715 | 44.2107215 |
| INTERPRO        | IPR000719   | Protein kinase, core                              | 9  | 6.382978723 | 0.035768108 | 209193_AT, | 133 | 476   | 16659 | 2.36827889  | 0.99999398 | 0.66469136 | 38.9695112 |
| GOTERM_BP_FAT   | GO:0043405  | regulation of MAP kinase activity                 | 5  | 3.546099291 | 0.035816215 | 208892_S_A | 120 | 141   | 13528 | 3.99763593  | 1          | 0.42113491 | 44.9313418 |
| GOTERM_BP_FAT   | GO:0000606  | protein import into nucleus, translocation        | 3  | 2.127659574 | 0.035845302 | 201464_X_A | 120 | 34    | 13528 | 9.94705882  | 1          | 0.41782861 | 44.9585086 |
| GOTERM_BP_FAT   | GO:0051094  | positive regulation of developmental process      | 7  | 4.964539007 | 0.03611056  | 201464_X_A | 120 | 278   | 13528 | 2.83860911  | 1          | 0.4166757  | 45.2056787 |
| GOTERM_MF_FAT   | GO:0003714  | transcription corepressor activity                | 5  | 3.546099291 | 0.036732623 | 219778_AT, | 113 | 145   | 12983 | 3.96185536  | 0.99999848 | 0.70417565 | 40.1640246 |
| GOTERM_BP_FAT   | GO:0043549  | regulation of kinase activity                     | 8  | 5.673758865 | 0.038189612 | 209193_AT, | 120 | 357   | 13528 | 2.52623716  | 1          | 0.43129096 | 47.1071753 |
| GOTERM_BP_FAT   | GO:0048514  | blood vessel morphogenesis                        | 6  | 4.255319149 | 0.038579436 | 201464_X_A | 120 | 211   | 13528 | 3.2056872   | 1          | 0.43110743 | 47.4567375 |
| GOTERM_BP_FAT   | GO:0048589  | developmental growth                              | 4  | 2.836879433 | 0.041278675 | 202443_X_A | 120 | 87    | 13528 | 5.18314176  | 1          | 0.45002003 | 49.8183435 |
| GOTERM_BP_FAT   | GO:0006469  | negative regulation of protein kinase activity    | 4  | 2.836879433 | 0.041278675 | 208892_S_A | 120 | 87    | 13528 | 5.18314176  | 1          | 0.45002003 | 49.8183435 |
| INTERPRO        | IPR015421   | Pyridoxal phosphate-dependent transferase, majo   | 3  | 2.127659574 | 0.041790031 | 212322_AT, | 133 | 41    | 16659 | 9.16504676  | 0.99999924 | 0.6908503  | 43.9390324 |
| GOTERM_BP_FAT   | GO:0044236  | multicellular organismal metabolic process        | 3  | 2.127659574 | 0.041838834 | 205680_AT, | 120 | 37    | 13528 | 9.14054054  | 1          | 0.45103137 | 50.2957806 |

|                 |                                                               |    |             |             |            |     |      |       |             |            |            |            |
|-----------------|---------------------------------------------------------------|----|-------------|-------------|------------|-----|------|-------|-------------|------------|------------|------------|
| UP_SEQ_FEATURE  | binding site:ATP                                              | 9  | 6.382978723 | 0.043076001 | 209193_AT_ | 139 | 542  | 19113 | 2.28327006  | 1          | 0.92446582 | 47.214071  |
| GOTERM_BP_FAT   | GO:0009725~response to hormone stimulus                       | 8  | 5.673758865 | 0.043254949 | 206665_S_A | 120 | 367  | 13528 | 2.45740236  | 1          | 0.45878386 | 51.483822  |
| GOTERM_BP_FAT   | GO:0009628~response to abiotic stimulus                       | 8  | 5.673758865 | 0.043784347 | 201464_X_A | 120 | 368  | 13528 | 2.45072464  | 1          | 0.45943806 | 51.9210702 |
| GOTERM_BP_FAT   | GO:0045767~regulation of anti-apoptosis                       | 3  | 2.127659574 | 0.04391466  | 206665_S_A | 120 | 38   | 13528 | 8.9         | 1          | 0.45700632 | 52.0281319 |
| BIOCARTA        | h_tnfr2Pathway:TNFR2 Signaling Pathway                        | 3  | 2.127659574 | 0.044349656 | 205599_AT_ | 30  | 17   | 1437  | 8.45294118  | 0.99349584 | 0.99349584 | 40.1530595 |
| GOTERM_BP_FAT   | GO:0033673~negative regulation of kinase activity             | 4  | 2.836879433 | 0.044904103 | 208892_S_A | 120 | 90   | 13528 | 5.01037037  | 1          | 0.46117389 | 52.8337563 |
| GOTERM_BP_FAT   | GO:0051338~regulation of transferase activity                 | 8  | 5.673758865 | 0.045943968 | 209193_AT_ | 120 | 372  | 13528 | 2.42437276  | 1          | 0.4656103  | 53.6667357 |
| GOTERM_BP_FAT   | GO:0051098~regulation of binding                              | 5  | 3.546099291 | 0.046046515 | 209193_AT_ | 120 | 153  | 13528 | 3.68409586  | 1          | 0.46301302 | 53.7481281 |
| GOTERM_BP_FAT   | GO:0006732~coenzyme metabolic process                         | 5  | 3.546099291 | 0.046046515 | 201761_AT_ | 120 | 153  | 13528 | 3.68409586  | 1          | 0.46301302 | 53.7481281 |
| INTERPRO        | IPRO12227:TNF receptor-associated factor TRAF                 | 2  | 1.418439716 | 0.046616856 | 205599_AT_ | 133 | 6    | 16659 | 41.7518797  | 0.99999986 | 0.70234534 | 47.6487634 |
| GOTERM_BP_FAT   | GO:0046394~carboxylic acid biosynthetic process               | 5  | 3.546099291 | 0.047894543 | 220346_AT_ | 120 | 155  | 13528 | 3.63655914  | 1          | 0.47320764 | 55.1921122 |
| GOTERM_BP_FAT   | GO:0016053~organic acid biosynthetic process                  | 5  | 3.546099291 | 0.047894543 | 220346_AT_ | 120 | 155  | 13528 | 3.63655914  | 1          | 0.47320764 | 55.1921122 |
| SP_PIR_KEYWORDS | differeiation                                                 | 8  | 5.673758865 | 0.048193829 | 214056_AT_ | 139 | 460  | 19235 | 2.40663122  | 0.99999735 | 0.6888535  | 47.5668769 |
| GOTERM_BP_FAT   | GO:0045935~positive regulation of nucleobase, nucleoside, nu  | 11 | 7.80141844  | 0.048210244 | 201464_X_A | 120 | 624  | 13528 | 1.98728632  | 1          | 0.47215548 | 55.4345158 |
| GOTERM_MF_FAT   | GO:0004715~non-membrane spanning protein tyrosine kinase      | 3  | 2.127659574 | 0.048629224 | 202123_S_A | 113 | 41   | 12983 | 8.4068638   | 0.99999998 | 0.77400306 | 49.5454719 |
| GOTERM_BP_FAT   | GO:0055082~cellular chemical homeostasis                      | 8  | 5.673758865 | 0.050466643 | 201464_X_A | 120 | 380  | 13528 | 2.37333333  | 1          | 0.48477149 | 57.1315308 |
| GOTERM_MF_FAT   | GO:0032052~bile acid binding                                  | 2  | 1.418439716 | 0.050666007 | 209699_X_A | 113 | 6    | 12983 | 38.2979351  | 0.99999999 | 0.7611337  | 51.0077514 |
| PIR_SUPERFAMILY | PIRSF015614:TRAF                                              | 2  | 1.418439716 | 0.050826443 | 205599_AT_ | 65  | 6    | 7396  | 37.9282051  | 0.98290145 | 0.86923859 | 42.4074241 |
| GOTERM_CC_FAT   | GO:0005794~Golgi apparatus                                    | 12 | 8.510638298 | 0.051352695 | 218871_X_A | 94  | 872  | 12782 | 1.87126684  | 0.999794   | 0.57205602 | 47.1251998 |
| GOTERM_BP_FAT   | GO:0045597~positive regulation of cell differentiation        | 6  | 4.255319149 | 0.051615589 | 201464_X_A | 120 | 229  | 13528 | 2.95371179  | 1          | 0.48937707 | 57.972145  |
| GOTERM_BP_FAT   | GO:0019369~arachidonic acid metabolic process                 | 2  | 1.418439716 | 0.051641585 | 209785_S_A | 120 | 6    | 13528 | 37.5777778  | 1          | 0.48627492 | 57.9909843 |
| GOTERM_BP_FAT   | GO:0051348~negative regulation of transferase activity        | 4  | 2.836879433 | 0.052612651 | 208892_S_A | 120 | 96   | 13528 | 4.69722222  | 1          | 0.48958504 | 58.6890681 |
| INTERPRO        | IPRO14393: Dual specificity protein phosphatase (MAP kinase f | 2  | 1.418439716 | 0.054173847 | 208892_S_A | 133 | 7    | 16659 | 35.7873255  | 0.99999999 | 0.73094676 | 53.0028469 |
| INTERPRO        | IPRO04826: Maf transcription factor                           | 2  | 1.418439716 | 0.054173847 | 204970_S_A | 133 | 7    | 16659 | 35.7873255  | 0.99999999 | 0.73094676 | 53.0028469 |
| SP_PIR_KEYWORDS | myristate                                                     | 4  | 2.836879433 | 0.054265675 | 202207_AT_ | 139 | 119  | 19235 | 4.6514721   | 0.9999995  | 0.70146291 | 51.7745366 |
| BIOCARTA        | h_arenr2Pathway:Oxidative Stress Induced Gene Expression'     | 3  | 2.127659574 | 0.054397032 | 201464_X_A | 30  | 19   | 1437  | 7.56315789  | 0.99798776 | 0.955142   | 46.900033  |
| GOTERM_CC_FAT   | GO:0005901~caveola                                            | 3  | 2.127659574 | 0.054918507 | 205282_AT_ | 94  | 52   | 12782 | 7.84492635  | 0.99988766 | 0.56251905 | 49.4781751 |
| SP_PIR_KEYWORDS | growth regulation                                             | 3  | 2.127659574 | 0.055527198 | 219475_AT_ | 139 | 53   | 19235 | 7.83290349  | 0.99999965 | 0.68100114 | 52.608642  |
| GOTERM_BP_FAT   | GO:0051241~negative regulation of multicellular organismal g  | 5  | 3.546099291 | 0.056713809 | 210513_S_A | 120 | 164  | 13528 | 3.43699187  | 1          | 0.51311373 | 61.5189453 |
| GOTERM_MF_FAT   | GO:0030528~transcription regulator activity                   | 20 | 14.18439716 | 0.058633455 | 201464_X_A | 113 | 1512 | 12983 | 1.51975933  | 1          | 0.78670828 | 56.3586242 |
| GOTERM_MF_FAT   | GO:0051393~alpha-actinin binding                              | 2  | 1.418439716 | 0.058859381 | 200906_S_A | 113 | 7    | 12983 | 32.8268015  | 1          | 0.76491704 | 56.5021345 |
| PIR_SUPERFAMILY | PIRSF00939:dual specificity protein phosphatase (MAP kinase   | 2  | 1.418439716 | 0.05904662  | 208892_S_A | 65  | 7    | 7396  | 32.5098901  | 0.99132414 | 0.79451943 | 47.469856  |
| PIR_SUPERFAMILY | PIRSF00939:MAPK_Ptase                                         | 2  | 1.418439716 | 0.05904662  | 208892_S_A | 65  | 7    | 7396  | 32.5098901  | 0.99132414 | 0.79451943 | 47.469856  |
| GOTERM_BP_FAT   | GO:0043433~negative regulation of transcription factor activi | 3  | 2.127659574 | 0.059454023 | 209193_AT_ | 120 | 45   | 13528 | 7.51555556  | 1          | 0.52696716 | 63.3071918 |
| GOTERM_MF_FAT   | GO:0008201~heparin binding                                    | 4  | 2.836879433 | 0.059479433 | 210513_S_A | 113 | 103  | 12983 | 4.46189535  | 1          | 0.74641962 | 56.8937527 |
| GOTERM_BP_FAT   | GO:0021700~developmental maturation                           | 4  | 2.836879433 | 0.059491565 | 216959_X_A | 120 | 101  | 13528 | 4.46468647  | 1          | 0.52393729 | 63.3311409 |
| UP_SEQ_FEATURE  | region of interest: Calmodulin-binding                        | 3  | 2.127659574 | 0.059958527 | 203723_AT_ | 139 | 55   | 19113 | 7.50019621  | 1          | 0.96179129 | 59.2296812 |
| UP_SEQ_FEATURE  | domain: Ig-like C2-type 5                                     | 3  | 2.127659574 | 0.059958527 | 200906_S_A | 139 | 55   | 19113 | 7.50019621  | 1          | 0.96179129 | 59.2296812 |
| GOTERM_BP_FAT   | GO:0046653~tetrahydrofolate metabolic process                 | 2  | 1.418439716 | 0.059987587 | 201761_AT_ | 120 | 7    | 13528 | 32.2095238  | 1          | 0.5237365  | 63.6461897 |
| GOTERM_BP_FAT   | GO:0017085~response to insecticide                            | 2  | 1.418439716 | 0.059987587 | 204341_AT_ | 120 | 7    | 13528 | 32.2095238  | 1          | 0.5237365  | 63.6461897 |
| COG_ONTOLOGY    | Coenzyme metabolism                                           | 2  | 1.418439716 | 0.060481291 | 201761_AT_ | 12  | 11   | 1950  | 29.5454545  | 0.39292344 | 0.39292344 | 28.9328184 |
| GOTERM_BP_FAT   | GO:0001501~skeletal system development                        | 7  | 4.964539007 | 0.062506614 | 202310_S_A | 120 | 319  | 13528 | 2.4737722   | 1          | 0.53559001 | 65.2073067 |
| GOTERM_BP_FAT   | GO:0006690~icosanoid metabolic process                        | 3  | 2.127659574 | 0.064194791 | 209785_S_A | 120 | 47   | 13528 | 7.19574468  | 1          | 0.54221947 | 66.2180546 |
| GOTERM_MF_FAT   | GO:0048037~cofactor binding                                   | 6  | 4.255319149 | 0.064309403 | 205770_AT_ | 113 | 249  | 12983 | 2.76852543  | 1          | 0.75335094 | 59.8342627 |
| GOTERM_BP_FAT   | GO:0042108~positive regulation of cytokine biosynthetic proc  | 3  | 2.127659574 | 0.066611606 | 210118_S_A | 120 | 48   | 13528 | 7.04583333  | 1          | 0.55274898 | 67.6171633 |
| GOTERM_BP_FAT   | GO:0060343~trabecula formation                                | 2  | 1.418439716 | 0.068260753 | 202310_S_A | 120 | 8    | 13528 | 28.18333333 | 1          | 0.55870328 | 68.5404357 |
| INTERPRO        | IPRO04032:PMP-22/EMP/MP20                                     | 2  | 1.418439716 | 0.069109943 | 201325_S_A | 133 | 9    | 16659 | 27.8345865  | 1          | 0.79309803 | 62.1250308 |
| GOTERM_CC_FAT   | GO:0044459~plasma membrane part                               | 23 | 16.31205674 | 0.069881495 | 216959_X_A | 94  | 2203 | 12782 | 1.41965984  | 0.99999914 | 0.62165443 | 58.3419157 |
| INTERPRO        | IPRO17441:Protein kinase, ATP binding site                    | 8  | 5.673758865 | 0.07017417  | 209193_AT_ | 133 | 455  | 16659 | 2.20229695  | 1          | 0.77701116 | 62.7078589 |
| GOTERM_BP_FAT   | GO:0010647~positive regulation of cell communication          | 7  | 4.964539007 | 0.070318688 | 202443_X_A | 120 | 329  | 13528 | 2.39858156  | 1          | 0.56668282 | 69.657916  |
| GOTERM_BP_FAT   | GO:0043009~chordate embryonic development                     | 7  | 4.964539007 | 0.071946291 | 206665_S_A | 120 | 331  | 13528 | 2.38408862  | 1          | 0.57215752 | 70.5152128 |
| GOTERM_BP_FAT   | GO:0008284~positive regulation of cell proliferation          | 8  | 5.673758865 | 0.072778819 | 220049_S_A | 120 | 414  | 13528 | 2.1784219   | 1          | 0.57337993 | 70.9448824 |
| GOTERM_BP_FAT   | GO:0007565~female pregnancy                                   | 4  | 2.836879433 | 0.072874774 | 204420_AT_ | 120 | 110  | 13528 | 4.09939394  | 1          | 0.57078575 | 70.9940252 |
| SP_PIR_KEYWORDS | pyridoxal phosphate                                           | 3  | 2.127659574 | 0.07312396  | 212322_AT_ | 139 | 62   | 19235 | 6.69586911  | 1          | 0.75591278 | 62.9372962 |
| GOTERM_BP_FAT   | GO:0044093~positive regulation of molecular function          | 10 | 7.092198582 | 0.073288996 | 205282_AT_ | 120 | 586  | 13528 | 1.92377702  | 1          | 0.5698601  | 71.2052737 |



|                 |                                                               |    |             |             |            |     |      |       |            |            |            |            |
|-----------------|---------------------------------------------------------------|----|-------------|-------------|------------|-----|------|-------|------------|------------|------------|------------|
| GOTERM_BP_FAT   | GO:0010604~positive regulation of macromolecule metabolic     | 13 | 9.219858156 | 0.073905484 | 201464_X_A | 120 | 857  | 13528 | 1.7100739  | 1          | 0.56998232 | 71.5170018 |
| GOTERM_BP_FAT   | GO:0043392~negative regulation of DNA binding                 | 3  | 2.127659574 | 0.074039235 | 209193_AT, | 120 | 51   | 13528 | 6.63137255 | 1          | 0.56765388 | 71.5842137 |
| GOTERM_BP_FAT   | GO:0033559~unsaturated fatty acid metabolic process           | 3  | 2.127659574 | 0.074039235 | 209785_S_A | 120 | 51   | 13528 | 6.63137255 | 1          | 0.56765388 | 71.5842137 |
| GOTERM_BP_FAT   | GO:0009792~embryonic development ending in birth or egg f     | 7  | 4.964539007 | 0.074428372 | 206665_S_A | 120 | 334  | 13528 | 2.36267465 | 1          | 0.56664591 | 71.7789148 |
| GOTERM_BP_FAT   | GO:0048705~skeletal system morphogenesis                      | 4  | 2.836879433 | 0.076017222 | 202310_S_A | 120 | 112  | 13528 | 4.02619048 | 1          | 0.57165478 | 72.560959  |
| INTERPRO        | IPR008343:MAP kinase phosphatase                              | 2  | 1.418439716 | 0.076489972 | 208892_S_A | 133 | 10   | 16659 | 25.0511278 | 1          | 0.78661653 | 65.9992562 |
| UP_SEQ_FEATURE  | short sequence motif:BH1                                      | 2  | 1.418439716 | 0.076635699 | 206665_S_A | 139 | 11   | 19113 | 25.000654  | 1          | 0.97822752 | 68.5559266 |
| GOTERM_MF_FAT   | GO:0070279~vitamin B6 binding                                 | 3  | 2.127659574 | 0.079015194 | 212322_AT, | 113 | 54   | 12983 | 6.38298918 | 1          | 0.80545447 | 67.6818805 |
| GOTERM_MF_FAT   | GO:0030170~pyridoxal phosphate binding                        | 3  | 2.127659574 | 0.079015194 | 212322_AT, | 113 | 54   | 12983 | 6.38298918 | 1          | 0.80545447 | 67.6818805 |
| UP_SEQ_FEATURE  | compositionally biased region:Poly-Pro                        | 7  | 4.964539007 | 0.079180911 | 200906_S_A | 139 | 413  | 19113 | 2.33056944 | 1          | 0.97347412 | 69.7904783 |
| SP_PIR_KEYWORDS | heparin-binding                                               | 3  | 2.127659574 | 0.079339698 | 210513_S_A | 139 | 65   | 19235 | 6.386829   | 1          | 0.76137099 | 66.057779  |
| GOTERM_BP_FAT   | GO:0001503~ossification                                       | 4  | 2.836879433 | 0.080841628 | 202310_S_A | 120 | 115  | 13528 | 3.92115942 | 1          | 0.5920757  | 74.812728  |
| SP_PIR_KEYWORDS | stress response                                               | 3  | 2.127659574 | 0.081447286 | 205193_AT, | 139 | 66   | 19235 | 6.29005886 | 1          | 0.74855594 | 67.0595009 |
| GOTERM_BP_FAT   | GO:0006955~immune response                                    | 11 | 7.80141844  | 0.082418757 | 220049_S_A | 120 | 690  | 13528 | 1.79719807 | 1          | 0.59651717 | 75.5103903 |
| GOTERM_MF_FAT   | GO:0042805~actinin binding                                    | 2  | 1.418439716 | 0.083021344 | 200906_S_A | 113 | 10   | 12983 | 22.9787611 | 1          | 0.80467016 | 69.5585263 |
| UP_SEQ_FEATURE  | domain:MATH                                                   | 2  | 1.418439716 | 0.083306428 | 205599_AT, | 139 | 12   | 19113 | 22.9172662 | 1          | 0.97077727 | 71.696111  |
| GOTERM_BP_FAT   | GO:0007242~intracellular signaling cascade                    | 17 | 12.05673759 | 0.083864663 | 209785_S_A | 120 | 1256 | 13528 | 1.52584926 | 1          | 0.6002543  | 76.1340254 |
| GOTERM_MF_FAT   | GO:0004857~enzyme inhibitor activity                          | 6  | 4.255319149 | 0.084229057 | 206665_S_A | 113 | 270  | 12983 | 2.55319567 | 1          | 0.79299312 | 70.1041279 |
| GOTERM_BP_FAT   | GO:0032225~regulation of synaptic transmission, dopaminerg    | 2  | 1.418439716 | 0.08459109  | 204748_AT, | 120 | 10   | 13528 | 22.5466667 | 1          | 0.60066126 | 76.4416842 |
| GOTERM_BP_FAT   | GO:0043403~skeletal muscle regeneration                       | 2  | 1.418439716 | 0.08459109  | 211924_S_A | 120 | 10   | 13528 | 22.5466667 | 1          | 0.60066126 | 76.4416842 |
| GOTERM_MF_FAT   | GO:0010843~promoter binding                                   | 3  | 2.127659574 | 0.086693882 | 201464_X_A | 113 | 57   | 12983 | 6.04704238 | 1          | 0.78689049 | 71.1896282 |
| GOTERM_BP_FAT   | GO:0051054~positive regulation of DNA metabolic process       | 3  | 2.127659574 | 0.086968134 | 201464_X_A | 120 | 56   | 13528 | 6.03928571 | 1          | 0.60842053 | 77.4225919 |
| UP_SEQ_FEATURE  | nucleotide phosphate-binding region:ATP                       | 12 | 8.510638298 | 0.08848463  | 203192_AT, | 139 | 962  | 19113 | 1.71522159 | 1          | 0.96962419 | 73.9296413 |
| GOTERM_BP_FAT   | GO:0008283~cell proliferation                                 | 8  | 5.673758865 | 0.089917628 | 206907_AT, | 120 | 436  | 13528 | 2.06850153 | 1          | 0.61840022 | 78.5864394 |
| UP_SEQ_FEATURE  | short sequence motif:BH2                                      | 2  | 1.418439716 | 0.089929312 | 206665_S_A | 139 | 13   | 19113 | 21.1543996 | 1          | 0.96373861 | 74.5228396 |
| GOTERM_BP_FAT   | GO:0009617~response to bacterium                              | 5  | 3.546099291 | 0.090582744 | 201464_X_A | 120 | 193  | 13528 | 2.92055268 | 1          | 0.61840297 | 78.8409877 |
| GOTERM_MF_FAT   | GO:0043027~caspase inhibitor activity                         | 2  | 1.418439716 | 0.09093791  | 206665_S_A | 113 | 11   | 12983 | 20.8897828 | 1          | 0.78806432 | 72.9734725 |
| INTERPRO        | IPR015422:Pyridoxal phosphate-dependent transferase, majo     | 2  | 1.418439716 | 0.091076278 | 217127_AT, | 133 | 12   | 16659 | 20.8759398 | 1          | 0.82635203 | 72.5998967 |
| INTERPRO        | IPR002475:BCL2-like apoptosis inhibitor                       | 2  | 1.418439716 | 0.091076278 | 206665_S_A | 133 | 12   | 16659 | 20.8759398 | 1          | 0.82635203 | 72.5998967 |
| INTERPRO        | IPR002083:MATH                                                | 2  | 1.418439716 | 0.091076278 | 205599_AT, | 133 | 12   | 16659 | 20.8759398 | 1          | 0.82635203 | 72.5998967 |
| SP_PIR_KEYWORDS | transmembrane protein                                         | 9  | 6.382978723 | 0.091266618 | 214056_AT, | 139 | 642  | 19235 | 1.9399247  | 1          | 0.76862168 | 71.3767119 |
| GOTERM_CC_FAT   | GO:0005819~spindle                                            | 4  | 2.836879433 | 0.091792736 | 218522_S_A | 94  | 147  | 12782 | 3.70010132 | 0.99999981 | 0.6965152  | 68.771492  |
| GOTERM_MF_FAT   | GO:0015171~amino acid transmembrane transporter activity      | 3  | 2.127659574 | 0.091932833 | 212290_AT, | 113 | 59   | 12983 | 5.8420579  | 1          | 0.77710663 | 73.376566  |
| SP_PIR_KEYWORDS | LIM domain                                                    | 3  | 2.127659574 | 0.09223688  | 202193_AT, | 139 | 71   | 19235 | 5.84709697 | 1          | 0.75286366 | 71.7736174 |
| GOTERM_BP_FAT   | GO:0009070~serine family amino acid biosynthetic process      | 2  | 1.418439716 | 0.092649506 | 217127_AT, | 120 | 11   | 13528 | 20.4969697 | 1          | 0.62429251 | 79.6139536 |
| GOTERM_BP_FAT   | GO:0007567~parturition                                        | 2  | 1.418439716 | 0.092649506 | 209785_S_A | 120 | 11   | 13528 | 20.4969697 | 1          | 0.62429251 | 79.6139536 |
| GOTERM_CC_FAT   | GO:0000267~cell fraction                                      | 13 | 9.219858156 | 0.093108528 | 218647_S_A | 94  | 1083 | 12782 | 1.63224691 | 0.99999985 | 0.67499791 | 69.3140086 |
| GOTERM_BP_FAT   | GO:0051186~cofactor metabolic process                         | 5  | 3.546099291 | 0.093212704 | 201761_AT, | 120 | 195  | 13528 | 2.89059829 | 1          | 0.62383689 | 79.8199456 |
| GOTERM_BP_FAT   | GO:0051100~negative regulation of binding                     | 3  | 2.127659574 | 0.095026303 | 209193_AT, | 120 | 59   | 13528 | 5.73220339 | 1          | 0.62851091 | 80.4700771 |
| UP_SEQ_FEATURE  | nucleotide phosphate-binding region:NADP                      | 3  | 2.127659574 | 0.095458118 | 206561_S_A | 139 | 72   | 19113 | 5.72931655 | 1          | 0.9635123  | 76.6788904 |
| SP_PIR_KEYWORDS | nucleotide-binding                                            | 18 | 12.76595745 | 0.095771798 | 203192_AT, | 139 | 1686 | 19235 | 1.47738037 | 1          | 0.74782641 | 73.1770563 |
| SP_PIR_KEYWORDS | manganese                                                     | 4  | 2.836879433 | 0.096290501 | 209193_AT, | 139 | 152  | 19235 | 3.64161303 | 1          | 0.73185172 | 73.3774829 |
| GOTERM_BP_FAT   | GO:0051091~positive regulation of transcription factor activi | 3  | 2.127659574 | 0.097758726 | 202637_S_A | 120 | 60   | 13528 | 5.63666667 | 1          | 0.6367308  | 81.4125582 |
| SMART           | SM00061:MATH                                                  | 2  | 1.418439716 | 0.099619286 | 205599_AT, | 80  | 12   | 9079  | 18.9145833 | 0.99969039 | 0.86735098 | 66.9501612 |

**Supplementary Table 7. Genes inhibited by Ox-PAPC (50ug/ml, 4hrs) in HAECs by 1.5 fold.**

Values are represented as log2 scale.

| ProbeSetID  | Gene.Symbol | log2(sc+C)  | log2(sc+Ox40) | log2(ADAM10si+C) | cutoff by -log2(1.5) value |                        | log2[(ADAM10si+Ox40)/(ADAM10si+C)] | The effects of ADAM10si on Fold induction by Ox40 (H-G) |
|-------------|-------------|-------------|---------------|------------------|----------------------------|------------------------|------------------------------------|---------------------------------------------------------|
|             |             |             |               |                  | log2(ADAM10si+Ox40)        | log2[(sc+Ox40)/(sc+C)] |                                    |                                                         |
| 219825_at   | CYP26B1     | 8.388583579 | 3.874179133   | 6.405008194      | 3.705304775                | <b>-4.514404446</b>    | -2.69970342                        | 1.814701026                                             |
| 211518_s_at | BMP4        | 9.730159116 | 7.535330536   | 9.172036037      | 6.800500834                | <b>-2.194828579</b>    | -2.371535202                       | -0.176706623                                            |
| 202687_s_at | TNFSF10     | 8.100263694 | 5.92531378    | 7.891517735      | 6.691890896                | <b>-2.174949913</b>    | -1.199626839                       | 0.975323074                                             |
| 209182_s_at | C10orf10    | 9.710113249 | 7.574637023   | 9.805716166      | 7.629806408                | <b>-2.135476226</b>    | -2.175909758                       | -0.040433533                                            |
| 202688_at   | TNFSF10     | 10.00585203 | 7.918398744   | 9.931076725      | 8.87316092                 | <b>-2.087453291</b>    | -1.057915805                       | 1.029537486                                             |
| 219684_at   | RTP4        | 4.921763329 | 2.934174067   | 6.638645288      | 3.797859713                | <b>-1.987589262</b>    | -2.840785575                       | -0.853196313                                            |
| 204072_s_at | FRY         | 7.360591798 | 5.382644371   | 7.333915739      | 5.140346518                | <b>-1.977947427</b>    | -2.193569221                       | -0.215621794                                            |
| 214329_x_at | TNFSF10     | 6.577768737 | 4.658339698   | 6.488819738      | 5.559067062                | <b>-1.919429039</b>    | -0.929752676                       | 0.989676363                                             |
| 218736_s_at | PALMD       | 9.872387001 | 7.961946976   | 9.964117478      | 8.896719754                | <b>-1.910440025</b>    | -1.067397724                       | 0.843042301                                             |
| 220319_s_at | MYLIP       | 5.856473911 | 3.952880731   | 5.54902285       | 3.766269027                | <b>-1.90359318</b>     | -1.782753823                       | 0.120839357                                             |
| 202023_at   | EFNA1       | 8.186285186 | 6.395832448   | 7.779739709      | 6.16756089                 | <b>-1.790452738</b>    | -1.612178819                       | 0.178273919                                             |
| 220351_at   | CCRL1       | 5.58923612  | 3.833576082   | 4.937351575      | 3.998474307                | <b>-1.755660038</b>    | -0.938877268                       | 0.81678277                                              |
| 218589_at   | LPAR6       | 8.181315618 | 6.428764471   | 7.98664591       | 6.411123611                | <b>-1.752551146</b>    | -1.575522299                       | 0.177028847                                             |
| 201340_s_at | ENC1        | 6.989831111 | 5.244481146   | 7.412316003      | 5.414259541                | <b>-1.745349965</b>    | -1.998056463                       | -0.252706498                                            |
| 209200_at   | MEF2C       | 7.322932412 | 5.581554544   | 7.315545713      | 5.484232447                | <b>-1.741377869</b>    | -1.831313266                       | -0.089935397                                            |
| 209183_s_at | C10orf10    | 11.11590487 | 9.376347935   | 11.26247281      | 9.431499179                | <b>-1.739556933</b>    | -1.830973635                       | -0.091416702                                            |
| 217502_at   | IFIT2       | 5.127427357 | 3.413431574   | 5.288333692      | 3.889822268                | <b>-1.713995782</b>    | -1.398511425                       | 0.315484358                                             |
| 218711_s_at | SDPR        | 8.986571412 | 7.284239337   | 8.192686451      | 7.034226551                | <b>-1.702332074</b>    | -1.1584599                         | 0.543872174                                             |
| 214059_at   | IFI44       | 5.360548984 | 3.698386873   | 6.990870709      | 4.065533008                | <b>-1.662162111</b>    | -2.925337701                       | -1.26317559                                             |
| 218559_s_at | MAFB        | 6.178769687 | 4.552070662   | 4.996160792      | 3.970683428                | <b>-1.626699024</b>    | -1.025477364                       | 0.60122166                                              |
| 203153_at   | IFIT1       | 6.755179647 | 5.128565071   | 8.93863775       | 7.744305482                | <b>-1.626614576</b>    | -1.194332269                       | 0.432282307                                             |
| 205883_at   | ZBTB16      | 4.620074776 | 3.032091855   | 5.718066716      | 3.277251331                | <b>-1.587982922</b>    | -2.440815385                       | -0.852832464                                            |
| 205960_at   | PDK4        | 5.069533491 | 3.522816119   | 4.850751466      | 3.484042009                | <b>-1.546717372</b>    | -1.366709457                       | 0.180007915                                             |
| 201341_at   | ENC1        | 8.470869614 | 6.938132072   | 8.580698851      | 6.754586993                | <b>-1.532737542</b>    | -1.826111859                       | -0.293374317                                            |
| 205529_s_at | RUNX1T1     | 6.63998722  | 5.111485079   | 6.658759494      | 5.294574401                | <b>-1.52850214</b>     | -1.364185093                       | 0.164317047                                             |
| 219243_at   | GIMAP4      | 9.09261922  | 7.57859098    | 9.122584133      | 7.821571483                | <b>-1.51402824</b>     | -1.30101265                        | 0.21301559                                              |
| 213844_at   | HOXA5       | 6.145689141 | 4.651462949   | 6.322751944      | 4.948114679                | <b>-1.494226192</b>    | -1.374637265                       | 0.119588927                                             |
| 212907_at   | SLC30A1     | 8.705847982 | 7.221042385   | 8.822865212      | 7.415615019                | <b>-1.484805597</b>    | -1.407250193                       | 0.077555404                                             |
| 221756_at   | PIK3IP1     | 6.398640194 | 4.917792485   | 6.205370136      | 5.191715421                | <b>-1.480847708</b>    | -1.013654715                       | 0.467192993                                             |
| 205528_s_at | RUNX1T1     | 6.575935984 | 5.1158491     | 6.521932545      | 5.72974096                 | <b>-1.460086884</b>    | -0.792191586                       | 0.667895299                                             |
| 221757_at   | PIK3IP1     | 5.483937543 | 4.024141133   | 5.294936684      | 3.949259224                | <b>-1.45979641</b>     | -1.345677459                       | 0.114118951                                             |
| 40687_at    | GJA4        | 5.219621926 | 3.780723815   | 4.388183284      | 3.48444866                 | <b>-1.438898111</b>    | -0.903734624                       | 0.535163487                                             |
| 204731_at   | TGFB3       | 7.590578345 | 6.152856167   | 6.629897656      | 5.091649729                | <b>-1.437722178</b>    | -1.538247927                       | -0.100525749                                            |
| 202481_at   | DHRS3       | 7.658698697 | 6.223374954   | 7.586713937      | 6.426657018                | <b>-1.435323743</b>    | -1.160056919                       | 0.275266823                                             |
| 204747_at   | IFIT3       | 5.769683064 | 4.335072564   | 7.581926024      | 5.908629271                | <b>-1.4346105</b>      | -1.673296753                       | -0.238686253                                            |
| 207354_at   | CCL16       | 4.925519905 | 3.511236004   | 4.318421411      | 3.462159344                | <b>-1.414283901</b>    | -0.856262067                       | 0.558021835                                             |
| 220751_s_at | C5orf4      | 5.586742546 | 4.176352579   | 4.78385966       | 3.779427263                | <b>-1.410389967</b>    | -1.004432397                       | 0.40595757                                              |
| 206932_at   | CH25H       | 4.902128632 | 3.492004581   | 3.305145563      | 3.032174062                | <b>-1.410124051</b>    | -0.272971501                       | 1.137152551                                             |
| 222108_at   | AMIGO2      | 8.016859194 | 6.624432393   | 7.720007366      | 6.540207667                | <b>-1.3924268</b>      | -1.179799699                       | 0.212627101                                             |

|             |          |             |             |             |             |                     |              |              |
|-------------|----------|-------------|-------------|-------------|-------------|---------------------|--------------|--------------|
| 202743_at   | PIK3R3   | 7.034185019 | 5.645566296 | 7.197673822 | 5.908506119 | <b>-1.388618723</b> | -1.289167703 | 0.09945102   |
| 209201_x_at | CXCR4    | 9.193491101 | 7.850086312 | 10.05970085 | 9.107454797 | <b>-1.343404789</b> | -0.952246049 | 0.39115874   |
| 201368_at   | ZFP36L2  | 9.254404722 | 7.915923119 | 8.769023562 | 7.754696234 | <b>-1.338481603</b> | -1.014327328 | 0.324154275  |
| 204069_at   | MEIS1    | 5.515307553 | 4.201112454 | 5.764887623 | 4.304459402 | <b>-1.314195099</b> | -1.46042822  | -0.146233122 |
| 211919_s_at | CXCR4    | 9.238278346 | 7.930104811 | 10.14813145 | 9.100107631 | <b>-1.308173535</b> | -1.048023816 | 0.26014972   |
| 209683_at   | FAM49A   | 5.568207105 | 4.269816402 | 5.539144366 | 4.305331038 | <b>-1.298390703</b> | -1.233813328 | 0.064577375  |
| 217028_at   | CXCR4    | 9.168396251 | 7.870083624 | 9.729104608 | 8.865188808 | <b>-1.298312627</b> | -0.8639158   | 0.434396827  |
| 221773_at   | ELK3     | 8.325945683 | 7.028717861 | 8.174725187 | 6.975736271 | <b>-1.297227822</b> | -1.198988916 | 0.098238906  |
| 203504_s_at | ABCA1    | 5.82027563  | 4.537585177 | 5.223060063 | 4.527634938 | <b>-1.282690454</b> | -0.695425125 | 0.587265328  |
| 206638_at   | RTR2B    | 6.321534065 | 5.047591115 | 5.93139585  | 4.434146702 | <b>-1.27394295</b>  | -1.497249148 | -0.223306198 |
| 208530_s_at | RARB     | 8.054411271 | 6.787652059 | 7.731879449 | 6.853821704 | <b>-1.266759212</b> | -0.878057745 | 0.388701467  |
| 204904_at   | GJA4     | 6.567220234 | 5.302604681 | 5.753143787 | 4.935297198 | <b>-1.264615552</b> | -0.817846589 | 0.446768963  |
| 212750_at   | PPP1R16B | 8.19643968  | 6.94833304  | 7.920536171 | 6.793697425 | <b>-1.248106641</b> | -1.126838745 | 0.121267895  |
| 202668_at   | EFNB2    | 9.128544305 | 7.885280615 | 8.192280733 | 6.813784994 | <b>-1.24326369</b>  | -1.378495739 | -0.135232049 |
| 204589_at   | NUAK1    | 9.415043235 | 8.191022683 | 9.465056999 | 8.525443065 | <b>-1.224020552</b> | -0.939613934 | 0.284406617  |
| 212093_s_at | MTUS1    | 9.532434691 | 8.310260553 | 9.529887295 | 8.587978565 | <b>-1.222174139</b> | -0.94190873  | 0.280265408  |
| 205020_s_at | ARL4A    | 8.121296661 | 6.900595243 | 8.26419611  | 6.768142119 | <b>-1.220701418</b> | -1.496053991 | -0.275352573 |
| 213668_s_at | SOX4     | 6.549002297 | 5.332413824 | 7.002752507 | 5.373653578 | <b>-1.216588472</b> | -1.62909893  | -0.412510458 |
| 202669_s_at | EFNB2    | 8.279978924 | 7.066760278 | 7.82194825  | 6.312726003 | <b>-1.213218645</b> | -1.509222247 | -0.296003602 |
| 218999_at   | TMEM140  | 8.186651709 | 6.974415048 | 8.541039483 | 7.837502282 | <b>-1.212236661</b> | -0.703537201 | 0.50869946   |
| 41577_at    | PPP1R16B | 8.276569597 | 7.06495937  | 7.917653462 | 6.866195253 | <b>-1.211610227</b> | -1.051458209 | 0.160152018  |
| 220300_at   | RGS3     | 5.238302743 | 4.027837927 | 4.802134939 | 3.775829174 | <b>-1.210464816</b> | -1.026305765 | 0.184159051  |
| 206127_at   | ELK3     | 5.277435106 | 4.069172981 | 5.174075106 | 4.439662807 | <b>-1.208262125</b> | -0.734412299 | 0.473849826  |
| 207480_s_at | MEIS2    | 9.086333019 | 7.88452414  | 9.060210787 | 8.086575086 | <b>-1.201808879</b> | -0.973635701 | 0.228173178  |
| 212399_s_at | VGLL4    | 8.776410436 | 7.582597038 | 9.102488457 | 7.815101297 | <b>-1.193813398</b> | -1.28738716  | -0.093573763 |
| 207220_at   | ART4     | 6.055558984 | 4.86241372  | 6.594490327 | 5.671897576 | <b>-1.193145264</b> | -0.922592751 | 0.270552513  |
| 212095_s_at | MTUS1    | 8.627630812 | 7.438351547 | 8.519103305 | 7.722012328 | <b>-1.189279265</b> | -0.797090977 | 0.392188288  |
| 209050_s_at | RALGDS   | 7.624500766 | 6.438319708 | 7.301922361 | 6.456316694 | <b>-1.186181059</b> | -0.845605667 | 0.340575391  |
| 209199_s_at | MEF2C    | 8.012979974 | 6.826958537 | 8.203890702 | 6.889624266 | <b>-1.186021437</b> | -1.314266436 | -0.128245    |
| 212183_at   | NUDT4    | 8.30886265  | 7.12795236  | 8.182630901 | 7.248611199 | <b>-1.18091029</b>  | -0.934019702 | 0.246890588  |
| 210174_at   | NR5A2    | 6.859203146 | 5.679771264 | 5.88677227  | 5.37979164  | <b>-1.179431882</b> | -0.50698063  | 0.672451252  |
| 209969_s_at | STAT1    | 7.90036024  | 6.725277399 | 8.419523305 | 7.458542953 | <b>-1.175082842</b> | -0.960980352 | 0.214102489  |
| 212096_s_at | MTUS1    | 10.55375565 | 9.37930607  | 10.64392677 | 9.617054581 | <b>-1.174449579</b> | -1.026872193 | 0.147577386  |
| 213094_at   | GPR126   | 7.205384144 | 6.038900098 | 5.695781707 | 4.830745567 | <b>-1.166484046</b> | -0.865036141 | 0.301447905  |
| 208337_s_at | NR5A2    | 5.092764069 | 3.927312061 | 3.917792351 | 3.653257786 | <b>-1.165452009</b> | -0.264534565 | 0.900917444  |
| 214004_s_at | VGLL4    | 8.689303735 | 7.535349202 | 9.173362386 | 8.014659532 | <b>-1.153954533</b> | -1.158702854 | -0.004748322 |
| 201416_at   | SOX4     | 8.894995016 | 7.75178313  | 9.185558223 | 8.195330535 | <b>-1.143211887</b> | -0.990227687 | 0.152984199  |
| 202869_at   | OAS1     | 7.165479841 | 6.028120412 | 9.123966918 | 8.209686483 | <b>-1.137359429</b> | -0.914280435 | 0.223078994  |
| 204633_s_at | RPS6KAS  | 7.429742472 | 6.31612804  | 7.147618759 | 6.254041677 | <b>-1.113614433</b> | -0.893577082 | 0.320037351  |
| 219427_at   | FAT4     | 5.64566854  | 4.533326471 | 5.048825141 | 4.302269333 | <b>-1.112342069</b> | -0.746555808 | 0.365786261  |
| 216831_s_at | RUNX1T1  | 5.230463501 | 4.119330803 | 5.424472614 | 4.486852066 | <b>-1.111132699</b> | -0.937620548 | 0.173512151  |
| 204249_s_at | LMO2     | 9.59814078  | 8.488072873 | 9.189193959 | 8.58056346  | <b>-1.110067907</b> | -0.608630499 | 0.501437408  |
| 212677_s_at | CEP68    | 6.522501233 | 5.423917128 | 6.172697985 | 4.758526921 | <b>-1.098584105</b> | -1.414171063 | -0.315586959 |
| 205080_at   | RARB     | 7.308940054 | 6.215011609 | 7.079795667 | 6.125138714 | <b>-1.093928445</b> | -0.954656953 | 0.139271492  |
| 201295_s_at | WSB1     | 8.65114204  | 7.567572216 | 7.355393998 | 6.785817343 | <b>-1.083569824</b> | -0.569576655 | 0.513993169  |

|             |                |             |             |             |             |                     |              |              |
|-------------|----------------|-------------|-------------|-------------|-------------|---------------------|--------------|--------------|
| 203505_at   | ABCA1          | 4.790210373 | 3.707748229 | 4.343797002 | 3.499316633 | <b>-1.082462144</b> | -0.844480369 | 0.237981775  |
| 207112_s_at | GAB1           | 5.128364431 | 4.046812101 | 5.268899742 | 4.205994504 | <b>-1.08155233</b>  | -1.062905237 | 0.018647093  |
| 219777_at   | GIMAP6         | 9.619405819 | 8.538358042 | 9.550593378 | 8.48792796  | <b>-1.081047778</b> | -1.062665418 | 0.01838236   |
| 211742_s_at | EVI2B          | 4.992504072 | 3.929400706 | 4.989319459 | 4.036676287 | <b>-1.063103367</b> | -0.952643172 | 0.110460195  |
| 207761_s_at | METTL7A        | 7.867728901 | 6.808454177 | 6.798723484 | 5.774481136 | <b>-1.059274724</b> | -1.024242347 | 0.035032376  |
| 212909_at   | LYPD1          | 5.969289007 | 4.910058417 | 5.868567909 | 5.093242568 | <b>-1.05923059</b>  | -0.775325341 | 0.283905249  |
| 212181_s_at | NUDT4 /// NUDT | 10.33301507 | 9.277931023 | 10.11040308 | 9.224410976 | <b>-1.055084047</b> | -0.8859921   | 0.169091947  |
| 209051_s_at | RALGDS         | 5.588744177 | 4.541156026 | 4.905130662 | 4.149138192 | <b>-1.04758815</b>  | -0.755992469 | 0.291595681  |
| 204067_at   | SUOX           | 6.351615004 | 5.305189329 | 6.083016837 | 5.212413144 | <b>-1.046425675</b> | -0.870603694 | 0.175821981  |
| 212353_at   | SULF1          | 6.855906098 | 5.810023145 | 5.93881689  | 5.327721814 | <b>-1.045882953</b> | -0.611095076 | 0.434787877  |
| 201294_s_at | WSB1           | 8.967550792 | 7.922024308 | 8.09657401  | 7.496520381 | <b>-1.045526483</b> | -0.600053629 | 0.445472854  |
| 201418_s_at | SOX4           | 6.567776385 | 5.530539294 | 6.752626333 | 5.883359565 | <b>-1.037237091</b> | -0.869266768 | 0.167970323  |
| 206302_s_at | NUDT4 /// NUDT | 9.927966734 | 8.891295441 | 9.475702995 | 8.519529856 | <b>-1.036671294</b> | -0.956173138 | 0.080498155  |
| 219494_at   | RAD54B         | 5.682243842 | 4.651988898 | 5.481160565 | 4.331714021 | <b>-1.030254944</b> | -1.149446544 | -0.119191601 |
| 208343_s_at | NR5A2          | 5.576855258 | 4.552681106 | 4.811859613 | 4.338440935 | <b>-1.024174153</b> | -0.473418678 | 0.550755475  |
| 201417_at   | SOX4           | 10.1453015  | 9.138555069 | 10.16827551 | 9.14090075  | <b>-1.006746428</b> | -1.027374764 | -0.020628336 |
| 202625_at   | LYN            | 7.457769656 | 6.461947047 | 7.158632348 | 6.094690805 | <b>-0.995822609</b> | -1.063941543 | -0.068118934 |
| 214295_at   | KIAA0485       | 4.134713149 | 3.145977411 | 3.970197884 | 3.023240161 | <b>-0.988735738</b> | -0.946957723 | 0.041778014  |
| 209049_s_at | ZMYND8         | 8.134547836 | 7.146786425 | 8.172755782 | 7.437516024 | <b>-0.987761411</b> | -0.735239758 | 0.252521653  |
| 204159_at   | CDKN2C         | 5.350781188 | 4.364504183 | 4.814646984 | 4.112209615 | <b>-0.986277005</b> | -0.702437369 | 0.283839636  |
| 211538_s_at | HSPA2          | 5.679489779 | 4.696542777 | 5.040997279 | 4.347929205 | <b>-0.982947001</b> | -0.693068074 | 0.289878927  |
| 204573_at   | CROT           | 5.768667893 | 4.7894214   | 5.675794288 | 5.302245721 | <b>-0.979246493</b> | -0.373548566 | 0.605697927  |
| 218346_s_at | SESN1          | 7.326374497 | 6.351204234 | 7.425811529 | 6.503332755 | <b>-0.975170263</b> | -0.922478773 | 0.052691489  |
| 209048_s_at | ZMYND8         | 7.882412253 | 6.914897686 | 7.920908395 | 7.192185721 | <b>-0.967514567</b> | -0.728722674 | 0.238791893  |
| 204635_at   | RPS6KA5        | 5.683074432 | 4.716303266 | 5.12605279  | 4.71715187  | <b>-0.966771166</b> | -0.40890092  | 0.557870247  |
| 203888_at   | THBD           | 8.464023086 | 7.50405055  | 9.344500365 | 8.357649259 | <b>-0.959972536</b> | -0.986851106 | -0.02687857  |
| 206303_s_at | NUDT4          | 8.923246541 | 7.964207217 | 8.528036188 | 7.850447281 | <b>-0.959039324</b> | -0.677588908 | 0.281450416  |
| 210754_s_at | LYN            | 8.540881736 | 7.586402929 | 8.506670084 | 7.279747863 | <b>-0.954478807</b> | -1.226922222 | -0.272443415 |
| 212182_at   | NUDT4 /// NUDT | 4.223351991 | 3.270118343 | 3.662695527 | 3.274764805 | <b>-0.953233648</b> | -0.387930722 | 0.565302926  |
| 221884_at   | MECOM          | 8.569163227 | 7.618990382 | 8.650087034 | 7.92991336  | <b>-0.950172845</b> | -0.720173674 | 0.229999171  |
| 212675_s_at | CEP68          | 7.594694777 | 6.645335983 | 6.897569283 | 6.027454124 | <b>-0.949358793</b> | -0.870115158 | 0.079243635  |
| 203917_at   | CXADR          | 6.862480984 | 5.914302556 | 7.215690753 | 6.591601425 | <b>-0.948178428</b> | -0.624089327 | 0.3240891    |
| 203394_s_at | HES1           | 6.293039147 | 5.347842881 | 6.296835403 | 5.353843749 | <b>-0.945196266</b> | -0.942991655 | 0.002204611  |
| 203887_s_at | THBD           | 9.384122442 | 8.444027106 | 10.15572738 | 9.13468048  | <b>-0.940095337</b> | -1.021046898 | -0.080951562 |
| 202626_s_at | LYN            | 8.352726134 | 7.418233558 | 8.33737021  | 7.169065678 | <b>-0.934492576</b> | -1.168304532 | -0.233811957 |
| 220637_at   | FAM124B        | 9.271350934 | 8.339416573 | 8.865807042 | 7.645364534 | <b>-0.931934361</b> | -1.220442508 | -0.288508147 |
| 219625_s_at | COL4A3BP       | 6.625303971 | 5.697603829 | 6.804516439 | 5.901247872 | <b>-0.927700142</b> | -0.903268566 | 0.024431576  |
| 210056_at   | RND1           | 5.885950267 | 4.967768572 | 5.728045536 | 4.924399474 | <b>-0.918181696</b> | -0.803646062 | 0.114535634  |
| 212188_at   | KCTD12         | 11.15293483 | 10.24056302 | 10.93959098 | 9.971538435 | <b>-0.912371807</b> | -0.968052548 | -0.05680742  |
| 221249_s_at | FAM117A        | 7.046591812 | 6.134279581 | 6.713002734 | 5.956939071 | <b>-0.912312231</b> | -0.756063662 | 0.156248569  |
| 212354_at   | SULF1          | 8.180550695 | 7.27524866  | 7.550223806 | 6.839193084 | <b>-0.905302036</b> | -0.711030722 | 0.194271314  |
| 202540_s_at | HMGCR          | 6.110860472 | 5.205580138 | 5.901114097 | 5.493614957 | <b>-0.905280334</b> | -0.407499914 | 0.497781193  |
| 221864_at   | ORAI3          | 5.572427545 | 4.679290996 | 5.240667715 | 4.552132326 | <b>-0.893136549</b> | -0.688535389 | 0.204601159  |
| 201369_s_at | ZFP36L2        | 4.577653628 | 3.688558279 | 4.305869968 | 3.491626806 | <b>-0.889095349</b> | -0.814243162 | 0.074852187  |
| 205552_s_at | OAS1           | 6.016383743 | 5.130571778 | 7.809642158 | 6.941292947 | <b>-0.885811964</b> | -0.868349211 | 0.017462754  |

|             |                |             |             |             |             |                     |              |              |
|-------------|----------------|-------------|-------------|-------------|-------------|---------------------|--------------|--------------|
| 201565_s_at | ID2            | 6.789876436 | 5.904185564 | 6.778758573 | 6.281124544 | <b>-0.885690872</b> | -0.49763403  | 0.388056842  |
| 201818_at   | LP-CAT1        | 7.540364264 | 6.662163268 | 8.292062869 | 6.760300145 | <b>-0.878200996</b> | -1.531762724 | -0.653561729 |
| 203395_s_at | HES1           | 5.17190263  | 4.295061333 | 4.977285049 | 4.498700714 | <b>-0.876841297</b> | -0.478584335 | 0.398256962  |
| 206133_at   | XAF1           | 6.065623221 | 5.18881892  | 7.23102188  | 6.557966639 | <b>-0.876804301</b> | -0.673055241 | 0.203749059  |
| 210102_at   | VWA5A          | 6.011667453 | 5.136181882 | 5.441671876 | 4.715640899 | <b>-0.875485571</b> | -0.726030977 | 0.149454594  |
| 222126_at   | AGFG2          | 5.931399855 | 5.056773844 | 5.536739262 | 5.333108622 | <b>-0.874626011</b> | -0.20363064  | 0.670995371  |
| 213761_at   | MDM1           | 4.073682903 | 3.201203487 | 3.837958549 | 3.068644227 | <b>-0.872479416</b> | -0.769314321 | 0.103165095  |
| 206756_at   | CHST7          | 6.212649558 | 5.340818569 | 6.788490954 | 6.048738166 | <b>-0.871830989</b> | -0.739752788 | 0.132078201  |
| 212192_at   | KCTD12         | 10.97039568 | 10.10207623 | 10.40697816 | 9.451675182 | <b>-0.868319451</b> | -0.955302975 | -0.086983523 |
| 48031_r_at  | C5orf4         | 5.02196417  | 4.154555391 | 4.510801792 | 4.042744089 | <b>-0.867408779</b> | -0.468057703 | 0.399351076  |
| 218032_at   | SDN            | 7.397931851 | 6.531780195 | 7.706127264 | 7.092526739 | <b>-0.866151656</b> | -0.613600525 | 0.252551131  |
| 204200_s_at | PDGFB          | 6.153945261 | 5.292404042 | 5.818717339 | 5.566242715 | <b>-0.861541219</b> | -0.252474624 | 0.609066595  |
| 205571_at   | LIPT1          | 6.034334435 | 5.178092778 | 5.689142887 | 4.728669254 | <b>-0.856241657</b> | -0.960473634 | -0.104231976 |
| 218995_s_at | EDN1           | 10.46591325 | 9.610787847 | 10.45223578 | 9.658302987 | <b>-0.855125407</b> | -0.793932797 | 0.06119261   |
| 221766_s_at | FAM46A         | 5.257118176 | 4.40557595  | 6.34131727  | 5.013053169 | <b>-0.851542226</b> | -1.328264101 | -0.476721875 |
| 219367_s_at | ---            | 7.610506221 | 6.759894105 | 7.647347957 | 6.895132866 | <b>-0.850612116</b> | -0.752215091 | 0.098397025  |
| 218350_s_at | PMNN           | 7.356476568 | 6.512730049 | 7.254162235 | 6.463688116 | <b>-0.843746519</b> | -0.79047412  | 0.053272399  |
| 211341_at   | POU4F1         | 7.218086171 | 6.37792612  | 6.893317299 | 5.935269746 | <b>-0.840160051</b> | -0.958047553 | -0.117887502 |
| 207968_s_at | MEF2C          | 4.38761606  | 3.554352901 | 4.581259637 | 3.447089476 | <b>-0.833263159</b> | -1.134170161 | -0.300907003 |
| 204288_s_at | SORBS2         | 7.68425462  | 6.860005227 | 7.677463506 | 6.885507024 | <b>-0.824249393</b> | -0.791956482 | 0.032292911  |
| 222372_at   | ---            | 6.026834029 | 5.207008809 | 5.893422847 | 5.39233812  | <b>-0.81982522</b>  | -0.501084727 | 0.318740493  |
| 212344_at   | SULF1          | 7.944694366 | 7.125295615 | 7.38551489  | 6.850395955 | <b>-0.819398751</b> | -0.535118935 | 0.284279815  |
| 216061_x_at | PDGFB          | 5.947930189 | 5.130552322 | 5.744645627 | 5.435470066 | <b>-0.817377868</b> | -0.309175561 | 0.508202307  |
| 202597_at   | IRF6           | 5.363595734 | 4.54759881  | 5.755060801 | 5.072578665 | <b>-0.815996923</b> | -0.682482137 | 0.133514787  |
| 201896_s_at | PRSC1          | 4.972352126 | 4.157060527 | 4.641498724 | 4.057495999 | <b>-0.815291599</b> | -0.584002725 | 0.231288874  |
| 205051_s_at | KIT            | 4.627544341 | 3.812619947 | 6.495412197 | 5.221279752 | <b>-0.814924394</b> | -1.274132444 | -0.45920805  |
| 205013_s_at | ADORA2A /// CY | 5.882795574 | 5.070196447 | 5.911543006 | 4.907728801 | <b>-0.812599127</b> | -1.003814205 | -0.191215078 |
| 203252_at   | CDK2AP2        | 7.084372244 | 6.274029134 | 7.009351948 | 6.233301586 | <b>-0.810343109</b> | -0.776050362 | 0.034292747  |
| 204315_s_at | GTSE1          | 4.71915756  | 3.912481748 | 4.077105924 | 3.699333729 | <b>-0.806675812</b> | -0.377772195 | 0.428903617  |
| 209238_at   | STX3           | 8.453144811 | 7.647456466 | 8.67225921  | 7.926434677 | <b>-0.805688344</b> | -0.745824533 | 0.059863811  |
| 219147_s_at | C9orf95        | 8.076365295 | 7.271388057 | 7.289462972 | 6.761353211 | <b>-0.804977239</b> | -0.528109761 | 0.276867477  |
| 202983_at   | HMTF           | 7.233044361 | 6.42837712  | 6.9920318   | 6.172772863 | <b>-0.804667241</b> | -0.819258936 | -0.014591696 |
| 217504_at   | ABCA6          | 5.33551132  | 4.531649994 | 4.919160732 | 4.432864654 | <b>-0.803861326</b> | -0.486296078 | 0.317565248  |
| 211580_s_at | PIK3R3         | 4.405566023 | 3.606438792 | 4.463854243 | 3.628146536 | <b>-0.799127231</b> | -0.835707707 | -0.036580476 |
| 203632_s_at | GPRC5B         | 6.727643008 | 5.945705285 | 6.742332254 | 5.937433179 | <b>-0.781937722</b> | -0.804899075 | -0.022961352 |
| 200920_s_at | BTG1           | 10.29742377 | 9.519316468 | 10.46747827 | 9.643767541 | <b>-0.778107297</b> | -0.823710726 | -0.045603428 |
| 203980_at   | FABP4          | 9.551390224 | 8.775171069 | 8.873671177 | 8.556276474 | <b>-0.776219155</b> | -0.317394703 | 0.458824452  |
| 212914_at   | CBX7           | 4.872461517 | 4.0963296   | 4.610036707 | 4.161873936 | <b>-0.776131918</b> | -0.448162772 | 0.327969146  |
| 206382_s_at | BDNF           | 5.11913362  | 4.343523798 | 4.806221991 | 4.556533195 | <b>-0.775609822</b> | -0.249688796 | 0.525921026  |
| 203625_x_at | SKP2           | 7.432081748 | 6.657277885 | 7.029691399 | 6.476084282 | <b>-0.774803863</b> | -0.553607117 | 0.221196746  |
| 201009_s_at | TXNIP          | 7.879983251 | 7.106602098 | 7.731911725 | 7.256417543 | <b>-0.773381153</b> | -0.475494182 | 0.29788697   |
| 202814_s_at | HEXIM1         | 7.270039176 | 6.497477304 | 7.116688513 | 6.34886204  | <b>-0.772561871</b> | -0.767826473 | 0.004735399  |
| 221221_s_at | KLHL3          | 7.532158657 | 6.760815881 | 8.137157474 | 7.289231306 | <b>-0.771342776</b> | -0.847926168 | -0.076583392 |
| 206289_at   | HOXA4          | 5.157402286 | 4.386646609 | 5.091557755 | 4.725101148 | <b>-0.770755677</b> | -0.366456607 | 0.40429907   |
| 204510_at   | CDC7           | 4.600088597 | 3.829621409 | 3.843249988 | 3.728640365 | <b>-0.770467188</b> | -0.114609623 | 0.655857565  |

|             |                 |             |             |             |             |                     |              |              |
|-------------|-----------------|-------------|-------------|-------------|-------------|---------------------|--------------|--------------|
| 215073_s_at | NR2F2           | 7.872109494 | 7.101993542 | 7.758090307 | 7.227936461 | <b>-0.770115952</b> | -0.530153846 | 0.239962106  |
| 213784_at   | IFT27           | 5.196288644 | 4.42722882  | 5.336696383 | 4.533831373 | <b>-0.769059824</b> | -0.80286501  | -0.033805186 |
| 209757_s_at | MYCN            | 5.15135049  | 4.382610605 | 5.227322422 | 3.971580565 | <b>-0.768739885</b> | -1.255741857 | -0.487001972 |
| 209119_x_at | NR2F2           | 6.44602687  | 5.678844122 | 6.720700306 | 6.140335076 | <b>-0.767182749</b> | -0.58036523  | 0.186817519  |
| 204821_at   | BTN3A3          | 6.55009466  | 5.783396907 | 7.02724001  | 6.515688394 | <b>-0.766697754</b> | -0.511551616 | 0.255146138  |
| 221123_x_at | ZNF395          | 5.966883225 | 5.205394821 | 5.681289691 | 5.377925557 | <b>-0.761488405</b> | -0.303364133 | 0.458124272  |
| 217164_at   | ---             | 5.564255348 | 4.805740911 | 5.491066963 | 5.15751455  | <b>-0.758514438</b> | -0.333552413 | 0.424962025  |
| 221044_s_at | TRIM34 /// TRIM | 5.890570036 | 5.135197621 | 6.027068617 | 5.248767757 | <b>-0.755372416</b> | -0.77830086  | -0.022928444 |
| 213260_at   | FOXC1           | 7.187449029 | 6.433393634 | 7.348028111 | 6.42487529  | <b>-0.754055395</b> | -0.923152821 | -0.169097426 |
| 201008_s_at | TXNIP           | 7.263343697 | 6.51167121  | 7.066111516 | 6.570025473 | <b>-0.751672488</b> | -0.496086043 | 0.255586445  |
| 212774_at   | ZNF238          | 8.368321762 | 7.617680642 | 8.20054718  | 7.509842455 | <b>-0.75064112</b>  | -0.690704725 | 0.059936395  |
| 213625_at   | ZKSCAN4         | 5.201239213 | 4.452456355 | 5.103912196 | 4.460491493 | <b>-0.748782858</b> | -0.643420703 | 0.105362154  |
| 218816_at   | LRRC1           | 4.628217814 | 3.881072108 | 4.615009259 | 3.63363182  | <b>-0.747145706</b> | -0.981377439 | -0.234231732 |
| 213227_at   | PGRMC2          | 7.782197311 | 7.037449962 | 8.022538239 | 7.274261409 | <b>-0.744747349</b> | -0.74827683  | -0.00352948  |
| 206940_s_at | POU4F1          | 8.723122785 | 7.979051907 | 8.254270125 | 7.459095142 | <b>-0.744070878</b> | -0.795174984 | -0.051104106 |
| 218149_s_at | ZNF395          | 7.426482907 | 6.683358604 | 7.120846671 | 6.639254827 | <b>-0.743124303</b> | -0.481591844 | 0.261532459  |
| 209426_s_at | AMACR /// C1Q1  | 5.326148188 | 4.583324215 | 5.161026976 | 4.437589665 | <b>-0.742823972</b> | -0.723437311 | 0.019386661  |
| 206114_at   | EPHA4           | 7.032820049 | 6.293261776 | 7.486984029 | 6.830777528 | <b>-0.739558274</b> | -0.656206501 | 0.083351772  |
| 201367_s_at | ZFP36L2         | 5.492056686 | 4.753396279 | 5.186398    | 4.755773063 | <b>-0.738660407</b> | -0.430624937 | 0.308035471  |
| 201010_s_at | TXNIP           | 8.444760104 | 7.713328182 | 8.014070624 | 7.598933037 | <b>-0.731431921</b> | -0.415137588 | 0.316294334  |
| 205805_s_at | ROR1            | 5.311797857 | 4.588275602 | 6.491036014 | 5.120291212 | <b>-0.723522256</b> | -1.370744802 | -0.647222547 |
| 219470_x_at | CCNJ            | 7.513682848 | 6.790221492 | 7.778322354 | 7.108589531 | <b>-0.723461356</b> | -0.669732823 | 0.053728532  |
| 212660_at   | PHF15           | 5.590764461 | 4.869271738 | 6.110979333 | 5.315776295 | <b>-0.721492723</b> | -0.795203038 | -0.073710315 |
| 214453_s_at | IFI44           | 8.196923088 | 7.476223993 | 9.74922236  | 9.275261515 | <b>-0.720699095</b> | -0.473960845 | 0.24673825   |
| 202190_at   | CSTF1           | 6.199345103 | 5.483424131 | 6.145684695 | 5.424145232 | <b>-0.715920972</b> | -0.721539463 | -0.00561849  |
| 211163_s_at | TNFRSF10C       | 5.545931944 | 4.830300265 | 5.838291433 | 5.34445199  | <b>-0.715631679</b> | -0.493839443 | 0.221792236  |
| 213348_at   | CDKN1C          | 5.541727399 | 4.828329874 | 4.612126505 | 4.37437469  | <b>-0.713397525</b> | -0.237751816 | 0.47564571   |
| 207574_s_at | GADD45B         | 7.19994109  | 6.489153134 | 6.590610483 | 6.248586564 | <b>-0.710787956</b> | -0.342023919 | 0.368764037  |
| 216199_s_at | MAP3K4          | 6.559770368 | 5.849000111 | 6.452203248 | 5.759515747 | <b>-0.710770257</b> | -0.692687502 | 0.018082756  |
| 217317_s_at | HERC2P2 /// HEF | 10.00146518 | 9.290747442 | 9.398807008 | 8.968387762 | <b>-0.710717736</b> | -0.430419246 | 0.280298489  |
| 214457_at   | HOXA2           | 4.329359997 | 3.619391569 | 3.972219557 | 3.547024676 | <b>-0.709968427</b> | -0.425194881 | 0.284773546  |
| 218361_at   | GOLPH3L         | 8.821941994 | 8.112544919 | 8.575614542 | 7.781905263 | <b>-0.709397075</b> | -0.793709279 | -0.084312204 |
| 204719_at   | ABCA8           | 8.368336985 | 7.661080224 | 8.105206042 | 7.483689573 | <b>-0.707256761</b> | -0.621516469 | 0.085740292  |
| 209761_s_at | SP110           | 5.912932651 | 5.207469805 | 7.137946333 | 6.480383429 | <b>-0.705462846</b> | -0.657562904 | 0.047899942  |
| 218006_s_at | ZNF22           | 6.911715301 | 6.210651616 | 6.803813688 | 6.001527513 | <b>-0.701063685</b> | -0.802286175 | -0.10122249  |
| 202815_s_at | HEXIM1          | 6.154830458 | 5.456956529 | 5.995213769 | 5.311352097 | <b>-0.697873929</b> | -0.683861672 | 0.014012258  |
| 204358_s_at | FLRT2           | 7.692398088 | 6.995535537 | 7.552280593 | 7.178880239 | <b>-0.696862552</b> | -0.373400354 | 0.323462198  |
| 222344_at   | ---             | 4.732873684 | 4.036690795 | 4.396008578 | 3.885497905 | <b>-0.696182889</b> | -0.510510673 | 0.185672216  |
| 219650_at   | ERCC6L          | 4.338978653 | 3.642905627 | 3.965823966 | 3.366185663 | <b>-0.696073027</b> | -0.599638303 | 0.096434723  |
| 212558_at   | SPRY1           | 4.862231603 | 4.167885057 | 5.982117438 | 4.107168519 | <b>-0.694346546</b> | -1.874948919 | -1.180602373 |
| 204653_at   | TFAP2A          | 6.639573699 | 5.945551823 | 6.966380316 | 6.548630424 | <b>-0.694021876</b> | -0.417749892 | 0.276271984  |
| 210296_s_at | PEX2            | 7.636941802 | 6.944249753 | 7.14354875  | 6.414047268 | <b>-0.69269205</b>  | -0.729501482 | -0.036809432 |
| 209305_s_at | GADD45B         | 7.266582753 | 6.574602086 | 6.578300271 | 6.570348807 | <b>-0.691980667</b> | -0.007951464 | 0.684029203  |
| 212224_at   | ALDH1A1         | 11.32294879 | 10.63246312 | 10.82480698 | 10.09439603 | <b>-0.690485668</b> | -0.73041095  | -0.039925282 |
| 212151_at   | PBX1            | 5.175311466 | 4.485811241 | 4.515389855 | 4.119314304 | <b>-0.689500225</b> | -0.396075551 | 0.293424674  |

|             |          |             |             |             |             |                     |              |              |
|-------------|----------|-------------|-------------|-------------|-------------|---------------------|--------------|--------------|
| 219306_at   | KIF15    | 4.634725049 | 3.945349174 | 3.929151732 | 3.449883529 | <b>-0.689375874</b> | -0.479268203 | 0.210107671  |
| 214639_s_at | HOXA1    | 4.842408166 | 4.153298513 | 5.016934968 | 4.125288429 | <b>-0.689109653</b> | -0.891646539 | -0.202536887 |
| 219148_at   | PBK      | 7.143798104 | 6.455806561 | 6.516958485 | 5.576713644 | <b>-0.687991543</b> | -0.940244841 | -0.252253299 |
| 219685_at   | TMEM35   | 5.699017819 | 5.012442422 | 5.842616125 | 5.158865177 | <b>-0.686575396</b> | -0.683750948 | 0.002824449  |
| 211792_s_at | CDKN2C   | 5.374801921 | 4.689999856 | 5.223896377 | 4.847657374 | <b>-0.684802065</b> | -0.376239003 | 0.308563062  |
| 205677_s_at | DLEU1    | 6.870162951 | 6.18599487  | 6.600107777 | 5.777251825 | <b>-0.68416808</b>  | -0.822855952 | -0.138687872 |
| 177_at      | PLD1     | 7.432527869 | 6.750434034 | 7.145833243 | 6.644052045 | <b>-0.682093835</b> | -0.501781197 | 0.180312638  |
| 201734_at   | CLCN3    | 9.067394679 | 8.388820166 | 9.222833885 | 8.459172788 | <b>-0.678574513</b> | -0.763661097 | -0.085086584 |
| 218755_at   | KIF20A   | 7.586070843 | 6.908294485 | 6.900246525 | 5.878820687 | <b>-0.677776358</b> | -1.021425839 | -0.343649481 |
| 214724_at   | DIXDC1   | 5.836246959 | 5.159450137 | 5.757893103 | 4.843309064 | <b>-0.676796822</b> | -0.914584039 | -0.237787216 |
| 200921_s_at | BTG1     | 10.06299273 | 9.386992019 | 9.917040835 | 9.003160452 | <b>-0.676000709</b> | -0.913880383 | -0.237879674 |
| 202440_s_at | ST5      | 3.974039298 | 3.298918863 | 4.354914341 | 3.561424892 | <b>-0.675120434</b> | -0.793489449 | -0.118369014 |
| 213019_at   | RANBP6   | 7.441997088 | 6.766909132 | 7.073810814 | 6.519869287 | <b>-0.675087956</b> | -0.553941527 | 0.121146429  |
| 215775_at   | ---      | 7.707925002 | 7.033262335 | 7.598009469 | 7.470935301 | <b>-0.674662667</b> | -0.127074168 | 0.547588498  |
| 221565_s_at | CALHM2   | 5.929790764 | 5.255176849 | 5.617722478 | 5.058844034 | <b>-0.674613915</b> | -0.558878444 | 0.115735471  |
| 219863_at   | HERC5    | 4.916543169 | 4.242461502 | 6.159555162 | 5.515534524 | <b>-0.674081667</b> | -0.644020638 | 0.030061029  |
| 219901_at   | FGD6     | 5.171130223 | 4.498066081 | 4.658349133 | 4.371595081 | <b>-0.673064141</b> | -0.286754052 | 0.386310089  |
| 221436_s_at | CDCA3    | 5.466567135 | 4.793550428 | 5.023173256 | 4.25963932  | <b>-0.673016707</b> | -0.763533936 | -0.090517229 |
| 219209_at   | IFIH1    | 6.834978612 | 6.162051829 | 7.927530004 | 7.396623118 | <b>-0.672926784</b> | -0.530906886 | 0.142019897  |
| 203408_s_at | SATB1    | 8.163533151 | 7.49097368  | 7.879846124 | 7.576359468 | <b>-0.672559471</b> | -0.303486656 | 0.369072815  |
| 209710_at   | GATA2    | 5.908551438 | 5.23634281  | 5.52379661  | 4.910080839 | <b>-0.672208628</b> | -0.613715772 | 0.058492856  |
| 203508_at   | TNFRSF1B | 5.033324674 | 4.36146959  | 5.145958078 | 4.892185991 | <b>-0.671855085</b> | -0.253772088 | 0.418082997  |
| 212494_at   | TENC1    | 5.715065515 | 5.043270899 | 5.624163134 | 5.028880551 | <b>-0.671794616</b> | -0.595282583 | 0.076512032  |
| 204187_at   | GMFR     | 7.48775934  | 6.816322832 | 7.601814381 | 7.057964121 | <b>-0.671436508</b> | -0.54385026  | 0.127586248  |
| 203209_at   | RFC5     | 5.953638146 | 5.28248646  | 5.270251733 | 4.412227073 | <b>-0.671151686</b> | -0.85802466  | -0.186872974 |
| 209662_at   | CETN3    | 6.902853516 | 6.232713978 | 6.137874516 | 5.778875703 | <b>-0.670139538</b> | -0.358998813 | 0.311140725  |
| 202227_s_at | BRD8     | 8.809453036 | 8.140607266 | 8.668328836 | 8.257470707 | <b>-0.66884577</b>  | -0.41085813  | 0.257987641  |
| 208012_x_at | SP110    | 6.954386972 | 6.285893133 | 8.0785566   | 7.339314489 | <b>-0.668493839</b> | -0.739242111 | -0.070748272 |
| 38241_at    | BTN3A3   | 5.475581511 | 4.807485436 | 5.850350674 | 5.186074504 | <b>-0.668096075</b> | -0.66427617  | 0.003819905  |
| 214466_at   | GJA5     | 4.286631207 | 3.618682459 | 4.068913459 | 3.636658577 | <b>-0.667948748</b> | -0.432254881 | 0.235693866  |
| 204967_at   | SHROOM2  | 6.066990351 | 5.399096485 | 6.223535152 | 5.240054061 | <b>-0.667893865</b> | -0.983481092 | -0.315587226 |
| 218633_x_at | ABHD10   | 7.204564931 | 6.537883749 | 7.157660181 | 6.341233177 | <b>-0.666681182</b> | -0.816427004 | -0.149745822 |
| 219546_at   | BMP2K    | 5.028567226 | 4.362001832 | 5.25992096  | 4.800809163 | <b>-0.666565394</b> | -0.459111797 | 0.207453597  |
| 221012_s_at | TRIM8    | 8.673586593 | 8.007144841 | 9.010131006 | 8.364497953 | <b>-0.666441752</b> | -0.645633053 | 0.020808699  |
| 210288_at   | KLRG1    | 6.640426926 | 5.975630944 | 6.685849848 | 6.122945952 | <b>-0.664795982</b> | -0.562903897 | 0.101892085  |
| 203764_at   | DLGAP5   | 7.836673754 | 7.173265835 | 7.399284806 | 6.803698662 | <b>-0.663407919</b> | -0.595586143 | 0.067821776  |
| 218326_s_at | LGR4     | 4.865531759 | 4.202577534 | 5.104551019 | 4.044984135 | <b>-0.662954225</b> | -1.059566884 | -0.396612659 |
| 218862_at   | ASB13    | 4.378226327 | 3.715335407 | 4.128702129 | 3.666684352 | <b>-0.66289092</b>  | -0.462017777 | 0.200873143  |
| 218573_at   | MAGEH1   | 6.912234844 | 6.250040866 | 6.799134456 | 6.339373361 | <b>-0.662193978</b> | -0.459761095 | 0.202432882  |
| 221589_s_at | ALDH6A1  | 5.877838733 | 5.215864783 | 4.821476396 | 4.029665203 | <b>-0.66197395</b>  | -0.791811193 | -0.129837243 |
| 218005_at   | ZNF22    | 8.623535404 | 7.961970702 | 8.547494066 | 7.626613912 | <b>-0.661564702</b> | -0.920880154 | -0.259315453 |
| 204917_s_at | MLLT3    | 4.678187493 | 4.016838419 | 4.605165363 | 4.316111928 | <b>-0.661349074</b> | -0.289053434 | 0.37229564   |
| 219568_x_at | SOX18    | 5.299917639 | 4.639321946 | 4.996951287 | 4.302566849 | <b>-0.660595693</b> | -0.694384437 | -0.033788744 |
| 205466_s_at | HS3ST1   | 3.81994569  | 3.160238065 | 3.34849638  | 3.045166868 | <b>-0.659707625</b> | -0.303329513 | 0.356378113  |
| 221640_s_at | LRDD     | 5.559230197 | 4.899610464 | 5.73805334  | 5.273507555 | <b>-0.659619733</b> | -0.464545785 | 0.195073948  |

|             |          |             |             |             |             |                     |              |              |
|-------------|----------|-------------|-------------|-------------|-------------|---------------------|--------------|--------------|
| 203432_at   | TMPO     | 6.616064588 | 5.957325489 | 6.268096156 | 5.710801861 | <b>-0.658739099</b> | -0.557294294 | 0.101444804  |
| 202326_at   | EHMT2    | 7.080490311 | 6.422958982 | 6.981813932 | 6.48978392  | <b>-0.657531329</b> | -0.492030012 | 0.165501317  |
| 204089_x_at | MAP3K4   | 6.056732656 | 5.400184361 | 6.118367598 | 5.074740174 | <b>-0.656548295</b> | -1.043627424 | -0.387079129 |
| 209121_x_at | NR2F2    | 9.834215135 | 9.179241282 | 10.13301369 | 9.634042508 | <b>-0.654973852</b> | -0.498971185 | 0.156002667  |
| 213373_s_at | CASP8    | 4.467352143 | 3.814213085 | 4.461603649 | 3.741961041 | <b>-0.653139058</b> | -0.719642607 | -0.066503549 |
| 220952_s_at | PLEKHA5  | 6.635364527 | 5.982942948 | 6.54670769  | 5.889638868 | <b>-0.652421579</b> | -0.657068822 | -0.004647243 |
| 209304_x_at | GADD45B  | 5.777573616 | 5.127027171 | 5.29040807  | 4.941021355 | <b>-0.650546445</b> | -0.349386715 | 0.30115973   |
| 204162_at   | NDC80    | 6.37939333  | 5.729969464 | 5.861053185 | 5.324045172 | <b>-0.649423866</b> | -0.537008013 | 0.112415853  |
| 203588_s_at | TFDP2    | 7.365631727 | 6.7168774   | 7.299789483 | 6.961992147 | <b>-0.648754326</b> | -0.337797337 | 0.31095699   |
| 218534_s_at | AGGF1    | 6.562582195 | 5.914444805 | 6.465283871 | 5.658751102 | <b>-0.64813739</b>  | -0.806532769 | -0.158395379 |
| 221213_s_at | ZNF280D  | 4.40785718  | 3.761281953 | 4.088208126 | 3.352144017 | <b>-0.646575227</b> | -0.736064109 | -0.089488881 |
| 202973_x_at | FAM13A   | 4.305373004 | 3.659117326 | 4.53686453  | 3.526551413 | <b>-0.646255678</b> | -1.010313118 | -0.364057439 |
| 202609_at   | EPS8     | 8.251436679 | 7.606396841 | 7.809068175 | 7.337514471 | <b>-0.645039839</b> | -0.471553704 | 0.173486135  |
| 205933_at   | SETBP1   | 5.861641289 | 5.217035752 | 6.064323942 | 5.367710768 | <b>-0.644605537</b> | -0.696613174 | -0.052007637 |
| 200864_s_at | RAB11A   | 6.865293822 | 6.220827841 | 6.973143404 | 6.147172088 | <b>-0.644465981</b> | -0.825971316 | -0.181505335 |
| 204822_at   | TTK      | 5.834998716 | 5.190824947 | 5.296398648 | 4.444066784 | <b>-0.644173769</b> | -0.852331864 | -0.208158095 |
| 57715_at    | CALHM2   | 5.229205137 | 4.587909334 | 4.707258994 | 4.218692068 | <b>-0.641295803</b> | -0.488566926 | 0.152728877  |
| 216614_at   | ---      | 3.950212039 | 3.309138572 | 3.529984341 | 3.211080856 | <b>-0.641073467</b> | -0.318903485 | 0.322169982  |
| 204566_at   | PPM1D    | 8.05960279  | 7.419053546 | 8.073538809 | 7.467447636 | <b>-0.640549244</b> | -0.606091174 | 0.03445807   |
| 212875_s_at | C2CD2    | 7.593155036 | 6.952691899 | 7.327544537 | 6.87904     | <b>-0.640463137</b> | -0.448504537 | 0.1919586    |
| 211814_s_at | CCNE2    | 4.470273161 | 3.829879031 | 4.544583599 | 4.040298268 | <b>-0.640394129</b> | -0.504285332 | 0.136108798  |
| 214131_at   | CYorf15B | 5.185694346 | 4.545473813 | 5.309651943 | 4.734313207 | <b>-0.640220533</b> | -0.575338735 | 0.064881797  |
| 218252_at   | CKAP2    | 8.030200494 | 7.394431595 | 7.589180143 | 6.848771404 | <b>-0.635768899</b> | -0.740408739 | -0.10463984  |
| 205203_at   | PLD1     | 8.123017583 | 7.489492742 | 7.843167724 | 7.362897363 | <b>-0.633524842</b> | -0.480270361 | 0.153254481  |
| 221485_at   | B4GALT5  | 9.057683991 | 8.424856902 | 9.150865669 | 8.278916592 | <b>-0.632827088</b> | -0.871949077 | -0.239121989 |
| 221688_s_at | IMP3     | 7.743991115 | 7.111215851 | 7.921478872 | 7.066164074 | <b>-0.632775265</b> | -0.855314798 | -0.222539533 |
| 215626_at   | ---      | 3.99918121  | 3.369461348 | 4.028224777 | 3.42592158  | <b>-0.629719863</b> | -0.602303197 | 0.027416666  |
| 204318_s_at | GTSE1    | 5.824293827 | 5.195537834 | 5.495548162 | 4.298483538 | <b>-0.628755993</b> | -1.197064624 | -0.568308631 |
| 220183_s_at | NUDT6    | 5.134765883 | 4.506545591 | 5.123302018 | 4.575821457 | <b>-0.628220292</b> | -0.547480561 | 0.080739731  |
| 59644_at    | BMP2K    | 4.709920534 | 4.082054301 | 4.901150737 | 4.355073531 | <b>-0.627866233</b> | -0.546077206 | 0.081789026  |
| 210658_s_at | GGA2     | 5.15733321  | 4.530489496 | 5.06193082  | 4.694187046 | <b>-0.626843714</b> | -0.367743775 | 0.259099939  |
| 212632_at   | STX7     | 8.230818803 | 7.604977081 | 8.350824574 | 7.936226138 | <b>-0.625841723</b> | -0.414598435 | 0.211243287  |
| 218769_s_at | ANKRA2   | 6.59299283  | 5.967313983 | 6.060956387 | 5.441896808 | <b>-0.625678847</b> | -0.619059579 | 0.006619267  |
| 219691_at   | SAMD9    | 5.62614656  | 5.001661508 | 6.707512029 | 5.976448278 | <b>-0.624485051</b> | -0.731063751 | -0.1065787   |
| 219258_at   | TIPIN    | 4.773640184 | 4.15052216  | 4.49482522  | 3.886544151 | <b>-0.623118024</b> | -0.608281069 | 0.014836954  |
| 217047_s_at | FAM13A   | 4.107660494 | 3.48731015  | 4.387392754 | 3.893372995 | <b>-0.620350345</b> | -0.494019759 | 0.126330586  |
| 203418_at   | CCNA2    | 6.748345595 | 6.131234528 | 6.437460908 | 5.425065871 | <b>-0.617111067</b> | -1.012395037 | -0.39528397  |
| 203595_s_at | IFIT5    | 6.621788689 | 6.004742343 | 7.79878229  | 6.653197769 | <b>-0.617046346</b> | -1.145584521 | -0.528538175 |
| 218719_s_at | GINS3    | 6.22770176  | 5.611230231 | 6.182269875 | 5.603094475 | <b>-0.61647153</b>  | -0.5791754   | 0.03729613   |
| 212148_at   | PBX1     | 4.763456575 | 4.147139188 | 4.127441295 | 3.563445281 | <b>-0.616317387</b> | -0.563996013 | 0.052321374  |
| 221087_s_at | APOL3    | 7.399307426 | 6.785109185 | 7.420671769 | 6.734104907 | <b>-0.614198242</b> | -0.686566862 | -0.07236862  |
| 200887_s_at | STAT1    | 9.742152944 | 9.128915664 | 10.40955265 | 9.832131044 | <b>-0.61323728</b>  | -0.577421606 | 0.035815674  |
| 209682_at   | CBLB     | 7.077430958 | 6.464228081 | 7.189666174 | 6.643195914 | <b>-0.613202878</b> | -0.54647026  | 0.066732617  |
| 219872_at   | FAM198B  | 7.778964924 | 7.165887407 | 7.469808649 | 7.099680613 | <b>-0.613077517</b> | -0.370128036 | 0.242949481  |
| 206271_at   | TLR3     | 4.752565305 | 4.141576076 | 5.198226058 | 4.714158226 | <b>-0.610989229</b> | -0.484067832 | 0.126921397  |



|             |         |             |             |             |             |                     |              |              |
|-------------|---------|-------------|-------------|-------------|-------------|---------------------|--------------|--------------|
| 213269_at   | ZNF248  | 5.295442393 | 4.684525128 | 5.209403927 | 4.691296152 | <b>-0.610917265</b> | -0.518107775 | 0.09280949   |
| 209732_at   | CLEC2B  | 10.19845468 | 9.590932407 | 10.13457006 | 10.08964635 | <b>-0.607522268</b> | -0.044923713 | 0.562598555  |
| 218259_at   | MKL2    | 7.181731985 | 6.574823181 | 6.796081058 | 6.210802337 | <b>-0.606908804</b> | -0.585278721 | 0.021630083  |
| 214318_s_at | FRY     | 6.754090876 | 6.147584403 | 6.548499169 | 6.079319074 | <b>-0.606506473</b> | -0.469180095 | 0.137326378  |
| 209120_at   | NR2F2   | 9.728375837 | 9.123056542 | 9.734506091 | 9.348610098 | <b>-0.605319296</b> | -0.385895993 | 0.219423303  |
| 205601_s_at | HOXB5   | 5.007037457 | 4.402094758 | 5.276774759 | 4.709360527 | <b>-0.604942699</b> | -0.567414232 | 0.037528467  |
| 204256_at   | ELOVL6  | 4.031199969 | 3.426400804 | 4.11062244  | 3.50017695  | <b>-0.604799165</b> | -0.610445491 | -0.005646326 |
| 205600_x_at | HOXB5   | 5.337933286 | 4.733235669 | 5.599971128 | 5.064662591 | <b>-0.604697617</b> | -0.535308537 | 0.06938908   |
| 204780_s_at | FAS     | 7.745968558 | 7.142596052 | 7.722378428 | 7.351296072 | <b>-0.603372506</b> | -0.371082355 | 0.232290151  |
| 209642_at   | BUB1    | 5.67948391  | 5.079061464 | 5.010157037 | 4.289084739 | <b>-0.600422446</b> | -0.721072298 | -0.120649852 |
| 215555_at   | ---     | 4.121189699 | 3.523980806 | 3.79111653  | 3.448197624 | <b>-0.597208893</b> | -0.342918907 | 0.254289987  |
| 220934_s_at | TMEM223 | 6.088727867 | 5.491876511 | 6.180626567 | 5.545867346 | <b>-0.596851357</b> | -0.634759221 | -0.037907865 |
| 213261_at   | TRANK1  | 4.827313182 | 4.231453891 | 5.442878669 | 4.6165249   | <b>-0.595859291</b> | -0.826353769 | -0.230494478 |
| 214250_at   | NUMA1   | 4.086775378 | 3.491295224 | 4.191194566 | 3.47997614  | <b>-0.595480155</b> | -0.711218426 | -0.115738271 |
| 207559_s_at | ZMYM3   | 6.238409276 | 5.643307388 | 5.987153312 | 5.918685448 | <b>-0.595101888</b> | -0.068467864 | 0.526634024  |
| 210567_s_at | SKP2    | 4.556791439 | 3.962071682 | 4.085193864 | 3.585310676 | <b>-0.594719757</b> | -0.499883188 | 0.09483657   |
| 221484_at   | B4GALT5 | 8.580112768 | 7.985732842 | 8.892438021 | 7.717021678 | <b>-0.594379926</b> | -1.175416344 | -0.581036418 |
| 210044_s_at | LYL1    | 7.609464614 | 7.015292707 | 7.803144596 | 7.027270269 | <b>-0.594171907</b> | -0.775874327 | -0.18170242  |
| 204112_s_at | HNMT    | 5.717777441 | 5.125063351 | 5.770792951 | 5.346691739 | <b>-0.59271409</b>  | -0.424101212 | 0.168612878  |
| 202870_s_at | CDC20   | 8.491879747 | 7.900462821 | 7.858511207 | 7.235599509 | <b>-0.591416926</b> | -0.622911698 | -0.031494772 |
| 201310_s_at | C5orf13 | 9.403734647 | 8.814629079 | 9.831002148 | 9.124608717 | <b>-0.589105568</b> | -0.706393431 | -0.117287863 |
| 219416_at   | SCARA3  | 5.354622485 | 4.769157812 | 5.323441921 | 5.009287229 | <b>-0.585464673</b> | -0.314154692 | 0.271309981  |
| 203409_at   | DDB2    | 8.357365602 | 7.772334618 | 8.274856267 | 7.844315891 | <b>-0.585030984</b> | -0.430540376 | 0.154490609  |

**Supplementary Table 8. Gene categories of genes inhibited by Ox-PAPC by 1.5 fold in HAECs.**  
**DAVID analysis used for the identification of gene categories.**  
<http://david.abcc.ncifcrf.gov/home.jsp>

| Category        | Term                                                  | Count | %     | PValue   | Genes                       | List Total | Pop Hits | Pop Total | Fold Enrichm | Bonferroni | Benjamini  | FDR        |
|-----------------|-------------------------------------------------------|-------|-------|----------|-----------------------------|------------|----------|-----------|--------------|------------|------------|------------|
| GOTERM_BP_FAT   | GO:0042127~regulation of cell proliferation           | 49    | 12.25 | 1.47E-10 | 210754_S_AT, 204526_S_AT, ; | 302        | 787      | 13528     | 2.78899669   | 3.38E-07   | 3.38E-07   | 2.57E-07   |
| SP_PIR_KEYWORDS | phosphoprotein                                        | 210   | 52.5  | 3.48E-10 | 213625_AT, 203504_S_AT, 20: | 395        | 7263     | 19235     | 1.40798603   | 1.12E-07   | 1.12E-07   | 4.70E-07   |
| GOTERM_BP_FAT   | GO:0007049~cell cycle                                 | 47    | 11.75 | 9.42E-10 | 203362_S_AT, 205698_S_AT, ; | 302        | 776      | 13528     | 2.71308118   | 2.17E-06   | 1.08E-06   | 1.65E-06   |
| GOTERM_BP_FAT   | GO:0022402~cell cycle process                         | 39    | 9.75  | 1.03E-09 | 203362_S_AT, 205698_S_AT, ; | 302        | 565      | 13528     | 3.09202368   | 2.37E-06   | 7.89E-07   | 1.80E-06   |
| GOTERM_BP_FAT   | GO:0022403~cell cycle phase                           | 32    | 8     | 3.27E-09 | 204315_S_AT, 219534_X_AT, ; | 302        | 414      | 13528     | 3.46239242   | 7.52E-06   | 1.88E-06   | 5.71E-06   |
| SP_PIR_KEYWORDS | cell cycle                                            | 30    | 7.5   | 9.72E-08 | 219534_X_AT, 203362_S_AT, ; | 395        | 461      | 19235     | 3.16895027   | 3.13E-05   | 1.56E-05   | 1.31E-04   |
| GOTERM_BP_FAT   | GO:0051726~regulation of cell cycle                   | 26    | 6.5   | 9.97E-08 | 204315_S_AT, 207574_S_AT, ; | 302        | 331      | 13528     | 3.51861707   | 2.29E-04   | 4.59E-05   | 1.74E-04   |
| SP_PIR_KEYWORDS | Proto-oncogene                                        | 20    | 5     | 2.95E-07 | 204917_S_AT, 210754_S_AT, ; | 395        | 230      | 19235     | 4.23445239   | 9.51E-05   | 3.17E-05   | 3.99E-04   |
| GOTERM_BP_FAT   | GO:0007507~heart development                          | 20    | 5     | 3.32E-07 | 213373_S_AT, 213260_AT, 20: | 302        | 215      | 13528     | 4.16694902   | 7.64E-04   | 1.27E-04   | 5.80E-04   |
| GOTERM_BP_FAT   | GO:0045859~regulation of protein kinase activity      | 25    | 6.25  | 8.09E-07 | 202540_S_AT, 207574_S_AT, ; | 302        | 345      | 13528     | 3.2459929    | 0.00186144 | 2.66E-04   | 0.0014144  |
| GOTERM_BP_FAT   | GO:0000278~mitotic cell cycle                         | 26    | 6.5   | 8.15E-07 | 204315_S_AT, 219534_X_AT, ; | 302        | 370      | 13528     | 3.14773582   | 0.00187476 | 2.35E-04   | 0.00142454 |
| GOTERM_BP_FAT   | GO:0043549~regulation of kinase activity              | 25    | 6.25  | 1.49E-06 | 202540_S_AT, 207574_S_AT, ; | 302        | 357      | 13528     | 3.13688389   | 0.00341691 | 3.80E-04   | 0.00259833 |
| GOTERM_BP_FAT   | GO:0042325~regulation of phosphorylation              | 29    | 7.25  | 1.82E-06 | 202540_S_AT, 210754_S_AT, ; | 302        | 466      | 13528     | 2.78765313   | 0.00418298 | 4.19E-04   | 0.00318209 |
| GOTERM_BP_FAT   | GO:0003002~regionalization                            | 18    | 4.5   | 1.95E-06 | 204917_S_AT, 207069_S_AT, ; | 302        | 197      | 13528     | 4.09291693   | 0.00447815 | 4.08E-04   | 0.00340713 |
| GOTERM_BP_FAT   | GO:0035295~tube development                           | 19    | 4.75  | 2.09E-06 | 213373_S_AT, 213844_AT, 21: | 302        | 220      | 13528     | 3.86863335   | 0.00479206 | 4.00E-04   | 0.00364654 |
| GOTERM_BP_FAT   | GO:0007389~pattern specification process              | 21    | 5.25  | 2.23E-06 | 204917_S_AT, 209119_X_AT, ; | 302        | 267      | 13528     | 3.52317881   | 0.00512896 | 3.95E-04   | 0.00390356 |
| GOTERM_BP_FAT   | GO:0051338~regulation of transferase activity         | 25    | 6.25  | 3.06E-06 | 202540_S_AT, 207574_S_AT, ; | 302        | 372      | 13528     | 3.01039664   | 0.00702042 | 5.03E-04   | 0.00534816 |
| GOTERM_BP_FAT   | GO:0007242~intracellular signaling cascade            | 54    | 13.5  | 3.63E-06 | 203504_S_AT, 210754_S_AT, ; | 302        | 1256     | 13528     | 1.92588687   | 0.00833051 | 5.58E-04   | 0.00635033 |
| GOTERM_BP_FAT   | GO:0051174~regulation of phosphorus metabolic proce   | 29    | 7.25  | 3.93E-06 | 202540_S_AT, 210754_S_AT, ; | 302        | 485      | 13528     | 2.6784461    | 0.00901522 | 5.66E-04   | 0.00687464 |
| GOTERM_BP_FAT   | GO:0019220~regulation of phosphate metabolic proces   | 29    | 7.25  | 3.93E-06 | 202540_S_AT, 210754_S_AT, ; | 302        | 485      | 13528     | 2.6784461    | 0.00901522 | 5.66E-04   | 0.00687464 |
| GOTERM_MF_FAT   | GO:0030528~transcription regulator activity           | 60    | 15    | 4.13E-06 | 213625_AT, 213260_AT, 2029: | 282        | 1512     | 12983     | 1.82694473   | 0.00222214 | 0.00222214 | 0.00601565 |
| GOTERM_BP_FAT   | GO:0000279~M phase                                    | 23    | 5.75  | 4.49E-06 | 203362_S_AT, 204444_AT, 20: | 302        | 329      | 13528     | 3.13154452   | 0.01027427 | 6.07E-04   | 0.00783968 |
| SP_PIR_KEYWORDS | nucleus                                               | 127   | 31.75 | 4.50E-06 | 222108_AT, 213625_AT, 2021: | 395        | 4283     | 19235     | 1.4439453    | 0.00144803 | 3.62E-04   | 0.00607838 |
| GOTERM_MF_FAT   | GO:0003700~transcription factor activity              | 44    | 11    | 5.64E-06 | 213625_AT, 213260_AT, 2021: | 282        | 975      | 12983     | 2.07765776   | 0.00302785 | 0.00151507 | 0.00820003 |
| GOTERM_BP_FAT   | GO:0008285~negative regulation of cell proliferation  | 24    | 6     | 6.07E-06 | 219534_X_AT, 202704_AT, 21: | 302        | 361      | 13528     | 2.97804113   | 0.01387562 | 7.76E-04   | 0.01060679 |
| KEGG_PATHWAY    | hsa04115:p53 signaling pathway                        | 11    | 2.75  | 6.96E-06 | 204315_S_AT, 213373_S_AT, ; | 131        | 68       | 5085      | 6.27918725   | 8.49E-04   | 8.49E-04   | 0.00801403 |
| SP_PIR_KEYWORDS | dna-binding                                           | 67    | 16.75 | 7.63E-06 | 213625_AT, 221213_S_AT, 21: | 395        | 1868     | 19235     | 1.74659827   | 0.00245492 | 4.91E-04   | 0.01030997 |
| GOTERM_BP_FAT   | GO:0001944~vasculature development                    | 19    | 4.75  | 1.32E-05 | 213373_S_AT, 40687_AT, 209: | 302        | 251      | 13528     | 3.39083401   | 0.02985786 | 0.00159413 | 0.02300902 |
| KEGG_PATHWAY    | hsa04110:Cell cycle                                   | 14    | 3.5   | 1.46E-05 | 203588_S_AT, 219534_X_AT, ; | 131        | 125      | 5085      | 4.34748092   | 0.00178315 | 8.92E-04   | 0.01684197 |
| GOTERM_BP_FAT   | GO:0043009~chordate embryonic development             | 22    | 5.5   | 1.66E-05 | 213373_S_AT, 203394_S_AT, ; | 302        | 331      | 13528     | 2.97729137   | 0.03753603 | 0.0019111  | 0.02903957 |
| GOTERM_BP_FAT   | GO:0048598~embryonic morphogenesis                    | 21    | 5.25  | 1.80E-05 | 213373_S_AT, 203394_S_AT, ; | 302        | 307      | 13528     | 3.06413271   | 0.04054933 | 0.00196922 | 0.03141932 |
| GOTERM_BP_FAT   | GO:0009792~embryonic development ending in birth or   | 22    | 5.5   | 1.89E-05 | 213373_S_AT, 203394_S_AT, ; | 302        | 334      | 13528     | 2.95054923   | 0.04264245 | 0.00197887 | 0.03307673 |
| GOTERM_BP_FAT   | GO:0009628~response to abiotic stimulus               | 23    | 5.75  | 2.60E-05 | 202540_S_AT, 218032_AT, 21: | 302        | 368      | 13528     | 2.79966887   | 0.058173   | 0.00260242 | 0.04548789 |
| GOTERM_BP_FAT   | GO:0048568~embryonic organ development                | 15    | 3.75  | 3.04E-05 | 205453_AT, 213844_AT, 2036: | 302        | 172      | 13528     | 3.90651471   | 0.06763834 | 0.00291385 | 0.05315208 |
| GOTERM_BP_FAT   | GO:0007067~mitosis                                    | 17    | 4.25  | 3.36E-05 | 214250_AT, 202870_S_AT, 20: | 302        | 220      | 13528     | 3.46140879   | 0.07447461 | 0.00309096 | 0.05873565 |
| GOTERM_BP_FAT   | GO:0000280~nuclear division                           | 17    | 4.25  | 3.36E-05 | 214250_AT, 202870_S_AT, 20: | 302        | 220      | 13528     | 3.46140879   | 0.07447461 | 0.00309096 | 0.05873565 |
| GOTERM_BP_FAT   | GO:0001568~blood vessel development                   | 18    | 4.5   | 3.50E-05 | 213373_S_AT, 40687_AT, 209: | 302        | 245      | 13528     | 3.29103933   | 0.07731783 | 0.00309023 | 0.06106994 |
| GOTERM_BP_FAT   | GO:0000087~M phase of mitotic cell cycle              | 17    | 4.25  | 4.18E-05 | 214250_AT, 202870_S_AT, 20: | 302        | 224      | 13528     | 3.39959792   | 0.09179955 | 0.00355995 | 0.07307131 |
| UP_SEQ_FEATURE  | mutagenesis site                                      | 69    | 17.25 | 4.74E-05 | 202869_AT, 210754_S_AT, 20: | 395        | 2045     | 19113     | 1.63262914   | 0.05621202 | 0.05621202 | 0.07679236 |
| GOTERM_BP_FAT   | GO:0045449~regulation of transcription                | 87    | 21.75 | 4.79E-05 | 213625_AT, 213260_AT, 2134: | 302        | 2601     | 13528     | 1.49832337   | 0.10430876 | 0.00392654 | 0.0835919  |
| GOTERM_MF_FAT   | GO:0003677~DNA binding                                | 78    | 19.5  | 5.02E-05 | 213625_AT, 205875_S_AT, 21: | 282        | 2331     | 12983     | 1.5405588    | 0.02666529 | 0.00896862 | 0.0730608  |
| GOTERM_BP_FAT   | GO:0051252~regulation of RNA metabolic process        | 66    | 16.5  | 5.23E-05 | 213625_AT, 213260_AT, 2029: | 302        | 1813     | 13528     | 1.63069516   | 0.11334286 | 0.00413958 | 0.09128089 |
| GOTERM_BP_FAT   | GO:0048285~organelle fission                          | 17    | 4.25  | 5.46E-05 | 214250_AT, 202870_S_AT, 20: | 302        | 229      | 13528     | 3.32537089   | 0.11804335 | 0.00417833 | 0.09531232 |
| GOTERM_BP_FAT   | GO:0010941~regulation of cell death                   | 37    | 9.25  | 6.35E-05 | 222108_AT, 213260_AT, 2056: | 302        | 815      | 13528     | 2.03362451   | 0.1360706  | 0.00470709 | 0.11097386 |
| GOTERM_BP_FAT   | GO:0009952~anterior/posterior pattern formation       | 13    | 3.25  | 6.81E-05 | 204917_S_AT, 209119_X_AT, ; | 302        | 140      | 13528     | 4.15950804   | 0.14500887 | 0.00488379 | 0.11885985 |
| GOTERM_BP_FAT   | GO:0043405~regulation of MAP kinase activity          | 13    | 3.25  | 7.29E-05 | 202540_S_AT, 202730_S_AT, ; | 302        | 141      | 13528     | 4.13000798   | 0.15455401 | 0.00507469 | 0.12737211 |
| GOTERM_BP_FAT   | GO:0006357~regulation of transcription from RNA polyr | 34    | 8.5   | 7.77E-05 | 209199_S_AT, 209121_X_AT, ; | 302        | 727      | 13528     | 2.09493792   | 0.16386566 | 0.00524988 | 0.13576855 |
| UP_SEQ_FEATURE  | short sequence motif:Antp-type hexapeptide            | 6     | 1.5   | 8.99E-05 | 205453_AT, 213844_AT, 2062: | 395        | 23       | 19113     | 12.6227848   | 0.10387698 | 0.05336226 | 0.14553085 |

|                 |                                                         |    |       |             |                             |     |      |       |            |            |            |            |
|-----------------|---------------------------------------------------------|----|-------|-------------|-----------------------------|-----|------|-------|------------|------------|------------|------------|
| GOTERM_BP_FAT   | GO:0006260~DNA replication                              | 15 | 3.75  | 9.03E-05    | 205875_S_AT, 221521_S_AT, ; | 302 | 190  | 13528 | 3.53642384 | 0.18777895 | 0.00592474 | 0.1577641  |
| PIR_SUPERFAMILY | PIRSF005680:interferon-induced 56K protein              | 4  | 1     | 1.22E-04    | 203596_S_AT, 204747_AT, 21: | 174 | 5    | 7396  | 34.0045977 | 0.02638214 | 0.02638214 | 0.15457956 |
| INTERPRO        | IPR001827:Homeobox protein, antennapedia type, cons     | 6  | 1.5   | 1.23E-04    | 205453_AT, 213844_AT, 206:  | 352 | 24   | 16659 | 11.8316761 | 0.08214482 | 0.08214482 | 0.18564109 |
| GOTERM_BP_FAT   | GO:0043067~regulation of programmed cell death          | 36 | 9     | 1.31E-04    | 222108_AT, 213260_AT, 2056: | 302 | 812  | 13528 | 1.98597201 | 0.26086652 | 0.00836142 | 0.22920825 |
| GOTERM_BP_FAT   | GO:0008284~positive regulation of cell proliferation    | 23 | 5.75  | 1.49E-04    | 210754_S_AT, 209757_S_AT, ; | 302 | 414  | 13528 | 2.48859455 | 0.29043668 | 0.00923026 | 0.26012731 |
| GOTERM_BP_FAT   | GO:0006355~regulation of transcription, DNA-depende     | 63 | 15.75 | 1.66E-04    | 213625_AT, 213260_AT, 2029: | 302 | 1773 | 13528 | 1.59168992 | 0.31769048 | 0.01000936 | 0.28977841 |
| GOTERM_BP_FAT   | GO:0033673~negative regulation of kinase activity       | 10 | 2.5   | 1.73E-04    | 202540_S_AT, 202730_S_AT, ; | 302 | 90   | 13528 | 4.97718911 | 0.32808959 | 0.01014385 | 0.30140317 |
| GOTERM_CC_FAT   | GO:0043232~intracellular non-membrane-bounded org       | 76 | 19    | 1.79E-04    | 210754_S_AT, 203362_S_AT, ; | 252 | 2596 | 12782 | 1.48493409 | 0.05184127 | 0.05184127 | 0.23886179 |
| GOTERM_CC_FAT   | GO:0043228~non-membrane-bounded organelle               | 76 | 19    | 1.79E-04    | 210754_S_AT, 203362_S_AT, ; | 252 | 2596 | 12782 | 1.48493409 | 0.05184127 | 0.05184127 | 0.23886179 |
| GOTERM_BP_FAT   | GO:0010605~negative regulation of macromolecule me      | 33 | 8.25  | 2.08E-04    | 203362_S_AT, 209120_AT, 21: | 302 | 734  | 13528 | 2.01393074 | 0.38120198 | 0.01192777 | 0.36370775 |
| GOTERM_BP_FAT   | GO:0012501~programmed cell death                        | 29 | 7.25  | 2.37E-04    | 213373_S_AT, 209199_S_AT, ; | 302 | 611  | 13528 | 2.12609878 | 0.42022691 | 0.01320758 | 0.41296791 |
| GOTERM_BP_FAT   | GO:0042981~regulation of apoptosis                      | 35 | 8.75  | 2.37E-04    | 222108_AT, 213260_AT, 2056: | 302 | 804  | 13528 | 1.95001812 | 0.42051904 | 0.01290699 | 0.41334893 |
| GOTERM_BP_FAT   | GO:0051348~negative regulation of transferase activity  | 10 | 2.5   | 2.82E-04    | 202540_S_AT, 202730_S_AT, ; | 302 | 96   | 13528 | 4.66611479 | 0.47792821 | 0.01500146 | 0.49218999 |
| GOTERM_BP_FAT   | GO:0009719~response to endogenous stimulus              | 22 | 5.5   | 2.92E-04    | 215719_X_AT, 211580_S_AT, ; | 302 | 405  | 13528 | 2.43329245 | 0.47997689 | 0.01518577 | 0.50982647 |
| SP_PIR_KEYWORDS | transcription                                           | 66 | 16.5  | 3.07E-04    | 213625_AT, 221213_S_AT, 21: | 395 | 2071 | 19235 | 1.55188284 | 0.09422481 | 0.01635874 | 0.41427119 |
| GOTERM_BP_FAT   | GO:0031327~negative regulation of cellular biosyntheti  | 27 | 6.75  | 3.33E-04    | 209199_S_AT, 209121_X_AT, ; | 302 | 561  | 13528 | 2.15589475 | 0.53597226 | 0.01691773 | 0.58118299 |
| GOTERM_BP_FAT   | GO:0045596~negative regulation of cell differentiation  | 15 | 3.75  | 3.45E-04    | 203504_S_AT, 203920_AT, 20: | 302 | 216  | 13528 | 3.11074319 | 0.54836847 | 0.01713174 | 0.60161727 |
| GOTERM_CC_FAT   | GO:0031981~nuclear lumen                                | 48 | 12    | 3.54E-04    | 205909_AT, 218006_S_AT, 20: | 252 | 1450 | 12782 | 1.67908046 | 0.09968999 | 0.05115333 | 0.47066727 |
| GOTERM_BP_FAT   | GO:0021546~rhombomere development                       | 4  | 1     | 3.57E-04    | 205453_AT, 214639_S_AT, 21: | 302 | 7    | 13528 | 25.5969726 | 0.56064266 | 0.01734656 | 0.62240636 |
| SP_PIR_KEYWORDS | mitosis                                                 | 13 | 3.25  | 4.06E-04    | 214250_AT, 202870_S_AT, 20: | 395 | 183  | 19235 | 3.45929308 | 0.12251882 | 0.01849816 | 0.54675513 |
| GOTERM_BP_FAT   | GO:0009890~negative regulation of biosynthetic proces   | 27 | 6.75  | 4.63E-04    | 209199_S_AT, 209121_X_AT, ; | 302 | 573  | 13528 | 2.11074512 | 0.65585732 | 0.02197779 | 0.80650735 |
| GOTERM_BP_FAT   | GO:0007050~cell cycle arrest                            | 10 | 2.5   | 4.77E-04    | 203725_AT, 213348_AT, 2195: | 302 | 103  | 13528 | 4.34900019 | 0.66677969 | 0.02217795 | 0.83079115 |
| GOTERM_BP_FAT   | GO:0045934~negative regulation of nucleobase, nucleo    | 25 | 6.25  | 4.86E-04    | 209199_S_AT, 209121_X_AT, ; | 302 | 512  | 13528 | 2.18724131 | 0.67363977 | 0.02214616 | 0.84645049 |
| GOTERM_BP_FAT   | GO:0044092~negative regulation of molecular function    | 19 | 4.75  | 5.01E-04    | 202540_S_AT, 207574_S_AT, ; | 302 | 334  | 13528 | 2.54820161 | 0.68482147 | 0.02238518 | 0.87268865 |
| GOTERM_BP_FAT   | GO:0010558~negative regulation of macromolecule bio     | 26 | 6.5   | 5.36E-04    | 209199_S_AT, 209121_X_AT, ; | 302 | 547  | 13528 | 2.12918145 | 0.70862383 | 0.02343526 | 0.93176187 |
| GOTERM_BP_FAT   | GO:0060429~epithelium development                       | 15 | 3.75  | 5.64E-04    | 213373_S_AT, 209119_X_AT, ; | 302 | 227  | 13528 | 2.96000233 | 0.72728553 | 0.02421759 | 0.98152869 |
| GOTERM_BP_FAT   | GO:0009725~response to hormone stimulus                 | 20 | 5     | 5.75E-04    | 215719_X_AT, 211580_S_AT, ; | 302 | 367  | 13528 | 2.44112817 | 0.73412959 | 0.02423387 | 1.00063212 |
| GOTERM_BP_FAT   | GO:0051325~interphase                                   | 10 | 2.5   | 5.89E-04    | 204315_S_AT, 219534_X_AT, ; | 302 | 106  | 13528 | 4.22591528 | 0.74258388 | 0.02437193 | 1.02491542 |
| GOTERM_BP_FAT   | GO:0051172~negative regulation of nitrogen compound     | 25 | 6.25  | 5.92E-04    | 209199_S_AT, 209121_X_AT, ; | 302 | 519  | 13528 | 2.15774094 | 0.7443032  | 0.02405877 | 1.02995061 |
| GOTERM_CC_FAT   | GO:0044427~chromosomal part                             | 19 | 4.75  | 6.23E-04    | 205053_AT, 209757_S_AT, 20: | 252 | 386  | 12782 | 2.49668969 | 0.16896224 | 0.05982885 | 0.82801348 |
| GOTERM_BP_FAT   | GO:0031328~positive regulation of cellular biosynthetic | 30 | 7.5   | 6.74E-04    | 209199_S_AT, 203504_S_AT, ; | 302 | 685  | 13528 | 1.96181177 | 0.78833958 | 0.02687391 | 1.17185597 |
| INTERPRO        | IPR013088:Zinc finger, NHR/GATA-type                    | 7  | 1.75  | 6.79E-04    | 203920_AT, 209119_X_AT, 20: | 352 | 51   | 16659 | 6.49582219 | 0.37617515 | 0.21017417 | 1.01773501 |
| GOTERM_BP_FAT   | GO:0006469~negative regulation of protein kinase activ  | 9  | 2.25  | 6.97E-04    | 202540_S_AT, 202730_S_AT, ; | 302 | 87   | 13528 | 4.63393469 | 0.79927206 | 0.02730654 | 1.21163556 |
| GOTERM_CC_FAT   | GO:0005694~chromosome                                   | 21 | 5.25  | 7.56E-04    | 205053_AT, 209757_S_AT, 20: | 252 | 460  | 12782 | 2.31557971 | 0.20119898 | 0.05461294 | 1.0041212  |
| GOTERM_BP_FAT   | GO:0008283~cell proliferation                           | 22 | 5.5   | 7.70E-04    | 201368_AT, 208965_S_AT, 21: | 302 | 436  | 13528 | 2.26028313 | 0.83025758 | 0.02961159 | 1.33729768 |
| SP_PIR_KEYWORDS | transcription regulation                                | 63 | 15.75 | 8.18E-04    | 213625_AT, 221213_S_AT, 21: | 395 | 2026 | 19235 | 1.51424519 | 0.23164062 | 0.03240069 | 1.09922585 |
| GOTERM_BP_FAT   | GO:0030097~hemopoiesis                                  | 15 | 3.75  | 8.33E-04    | 213373_S_AT, 215719_X_AT, ; | 302 | 236  | 13528 | 2.84712089 | 0.85318916 | 0.03147099 | 1.44594425 |
| GOTERM_BP_FAT   | GO:0009891~positive regulation of biosynthetic proces   | 30 | 7.5   | 8.52E-04    | 209199_S_AT, 203504_S_AT, ; | 302 | 695  | 13528 | 1.93358426 | 0.85952986 | 0.03166425 | 1.47897029 |
| GOTERM_BP_FAT   | GO:0048514~blood vessel morphogenesis                   | 14 | 3.5   | 8.90E-04    | 213373_S_AT, 209119_X_AT, ; | 302 | 211  | 13528 | 2.97216032 | 0.87127977 | 0.03252564 | 1.54428182 |
| GOTERM_BP_FAT   | GO:0000075~cell cycle checkpoint                        | 9  | 2.25  | 9.40E-04    | 204315_S_AT, 203362_S_AT, ; | 302 | 91   | 13528 | 4.43024525 | 0.88512431 | 0.03376451 | 1.62929453 |
| GOTERM_BP_FAT   | GO:0051301~cell division                                | 17 | 4.25  | 9.52E-04    | 202870_S_AT, 203362_S_AT, ; | 302 | 295  | 13528 | 2.58138961 | 0.88846686 | 0.03369175 | 1.65134339 |
| GOTERM_CC_FAT   | GO:0031974~membrane-enclosed lumen                      | 56 | 14    | 9.53E-04    | 210754_S_AT, 205909_AT, 21: | 252 | 1856 | 12782 | 1.53041188 | 0.24658652 | 0.05505468 | 1.26393806 |
| GOTERM_BP_FAT   | GO:0006915~apoptosis                                    | 27 | 6.75  | 9.62E-04    | 213373_S_AT, 209199_S_AT, ; | 302 | 602  | 13528 | 2.00906471 | 0.89078651 | 0.03349468 | 1.66703375 |
| GOTERM_BP_FAT   | GO:0001657~ureteric bud development                     | 6  | 1.5   | 9.90E-04    | 212558_AT, 206382_S_AT, 21: | 302 | 35   | 13528 | 7.67909177 | 0.89778427 | 0.03396537 | 1.716453   |
| GOTERM_BP_FAT   | GO:0043069~negative regulation of programmed cell de    | 19 | 4.75  | 0.001142949 | 222108_AT, 209199_S_AT, 21: | 302 | 359  | 13528 | 2.37075024 | 0.92810673 | 0.0385302  | 1.97866187 |
| SP_PIR_KEYWORDS | cell division                                           | 15 | 3.75  | 0.001151693 | 202870_S_AT, 203362_S_AT, ; | 395 | 264  | 19235 | 2.76682969 | 0.30999676 | 0.04039043 | 1.54445565 |
| GOTERM_BP_FAT   | GO:0060548~negative regulation of cell death            | 19 | 4.75  | 0.001193663 | 222108_AT, 209199_S_AT, 21: | 302 | 360  | 13528 | 2.36416483 | 0.93603718 | 0.03962662 | 2.06559688 |
| GOTERM_BP_FAT   | GO:0051173~positive regulation of nitrogen compound     | 28 | 7     | 0.001196682 | 209199_S_AT, 203504_S_AT, ; | 302 | 644  | 13528 | 1.94759574 | 0.9364807  | 0.03916059 | 2.07076985 |
| GOTERM_BP_FAT   | GO:0010628~positive regulation of gene expression       | 26 | 6.5   | 0.001262492 | 209199_S_AT, 209121_X_AT, ; | 302 | 581  | 13528 | 2.00458219 | 0.94542023 | 0.04069304 | 2.18346776 |
| GOTERM_BP_FAT   | GO:0001822~kidney development                           | 9  | 2.25  | 0.001332531 | 219658_AT, 212558_AT, 2063: | 302 | 96   | 13528 | 4.19950331 | 0.95355715 | 0.04231164 | 2.30327504 |
| GOTERM_BP_FAT   | GO:0008219~cell death                                   | 30 | 7.5   | 0.001420072 | 213373_S_AT, 209199_S_AT, ; | 302 | 719  | 13528 | 1.86904181 | 0.96204403 | 0.0444184  | 2.45282389 |
| GOTERM_BP_FAT   | GO:0051094~positive regulation of developmental proc    | 16 | 4     | 0.001429784 | 210754_S_AT, 203332_S_AT, ; | 302 | 278  | 13528 | 2.57811234 | 0.96288436 | 0.04411667 | 2.46940159 |
| GOTERM_MF_FAT   | GO:0016564~transcription repressor activity             | 17 | 4.25  | 0.001437834 | 209119_X_AT, 209121_X_AT, ; | 282 | 316  | 12983 | 2.47678203 | 0.53888673 | 0.17595315 | 2.07160507 |

|                 |                                                         |    |       |             |                             |     |      |       |            |            |            |            |
|-----------------|---------------------------------------------------------|----|-------|-------------|-----------------------------|-----|------|-------|------------|------------|------------|------------|
| GOTERM_BP_FAT   | GO:0010604~positive regulation of macromolecule met     | 34 | 8.5   | 0.001468787 | 210754_S_AT, 213260_AT, 201 | 302 | 857  | 13528 | 1.7771527  | 0.96607606 | 0.04469516 | 2.53595329 |
| GOTERM_BP_FAT   | GO:0045860~positive regulation of protein kinase activi | 14 | 3.5   | 0.001482695 | 205498_AT, 207574_S_AT, 201 | 302 | 223  | 13528 | 2.81222344 | 0.96714647 | 0.04452111 | 2.55967266 |
| GOTERM_BP_FAT   | GO:0010033~response to organic substance                | 30 | 7.5   | 0.001487495 | 213373_S_AT, 215719_X_AT, ; | 302 | 721  | 13528 | 1.86385723 | 0.96750805 | 0.04408758 | 2.56785876 |
| GOTERM_MF_FAT   | GO:0004879~ligand-dependent nuclear receptor activit    | 7  | 1.75  | 0.001534715 | 203920_AT, 209119_X_AT, 201 | 282 | 58   | 12983 | 5.55643189 | 0.56233902 | 0.15232853 | 2.20974096 |
| GOTERM_BP_FAT   | GO:0016265~death                                        | 30 | 7.5   | 0.001557092 | 213373_S_AT, 209199_S_AT, ; | 302 | 724  | 13528 | 1.85613406 | 0.97232479 | 0.04551872 | 2.68646706 |
| GOTERM_MF_FAT   | GO:0043565~sequence-specific DNA binding                | 26 | 6.5   | 0.00157691  | 209199_S_AT, 209121_X_AT, ; | 282 | 607  | 12983 | 1.97201678 | 0.57217762 | 0.13195165 | 2.2698482  |
| GOTERM_BP_FAT   | GO:0045935~positive regulation of nucleobase, nucleos   | 27 | 6.75  | 0.001598745 | 209199_S_AT, 203504_S_AT, ; | 302 | 624  | 13528 | 1.9382323  | 0.97485901 | 0.04612365 | 2.75738892 |
| GOTERM_BP_FAT   | GO:0048738~cardiac muscle tissue development            | 7  | 1.75  | 0.00161492  | 219658_AT, 213260_AT, 20501 | 302 | 57   | 13528 | 5.50110375 | 0.97577937 | 0.04600378 | 2.78491628 |
| GOTERM_BP_FAT   | GO:0007243~protein kinase cascade                       | 19 | 4.75  | 0.001623429 | 207574_S_AT, 205698_S_AT, ; | 302 | 370  | 13528 | 2.30026848 | 0.97624994 | 0.04567608 | 2.79939459 |
| GOTERM_BP_FAT   | GO:0007167~enzyme linked receptor protein signaling p   | 18 | 4.5   | 0.001709214 | 205805_S_AT, 207069_S_AT, ; | 302 | 342  | 13528 | 2.35761589 | 0.9805124  | 0.04745411 | 2.94524509 |
| GOTERM_BP_FAT   | GO:0006974~response to DNA damage stimulus              | 19 | 4.75  | 0.001762325 | 204315_S_AT, 205875_S_AT, ; | 302 | 373  | 13528 | 2.28176766 | 0.98275875 | 0.04831167 | 3.03543957 |
| GOTERM_BP_FAT   | GO:0010942~positive regulation of cell death            | 21 | 5.25  | 0.001781744 | 213373_S_AT, 215719_X_AT, ; | 302 | 435  | 13528 | 2.16250285 | 0.98351383 | 0.04825738 | 3.06839866 |
| SP_PIR_KEYWORDS | DNA binding                                             | 17 | 4.25  | 0.00183726  | 209199_S_AT, 209119_X_AT, ; | 395 | 340  | 19235 | 2.43481013 | 0.44685873 | 0.05749512 | 2.45330322 |
| GOTERM_BP_FAT   | GO:0001701~in utero embryonic development               | 12 | 3     | 0.001955856 | 221884_AT, 213260_AT, 20331 | 302 | 176  | 13528 | 3.05418423 | 0.98896616 | 0.05223836 | 3.36343317 |
| GOTERM_BP_FAT   | GO:0043406~positive regulation of MAP kinase activity   | 9  | 2.25  | 0.001965617 | 211919_S_AT, 205498_AT, 201 | 302 | 102  | 13528 | 3.9524737  | 0.98921182 | 0.05189112 | 3.37994935 |
| GOTERM_BP_FAT   | GO:0033674~positive regulation of kinase activity       | 14 | 3.5   | 0.002033887 | 205498_AT, 207574_S_AT, 201 | 302 | 231  | 13528 | 2.71483042 | 0.99078364 | 0.05303901 | 3.49538251 |
| GOTERM_BP_FAT   | GO:0010629~negative regulation of gene expression       | 23 | 5.75  | 0.002044101 | 209199_S_AT, 209119_X_AT, ; | 302 | 504  | 13528 | 2.04420267 | 0.99099824 | 0.05270222 | 3.51264187 |
| GOTERM_BP_FAT   | GO:0008354~germ cell migration                          | 4  | 1     | 0.002066944 | 202540_S_AT, 211919_S_AT, ; | 302 | 12   | 13528 | 14.9315673 | 0.99146031 | 0.05268664 | 3.55123187 |
| GOTERM_BP_FAT   | GO:0048534~hemopoietic or lymphoid organ developm       | 15 | 3.75  | 0.002087676 | 213373_S_AT, 215719_X_AT, ; | 302 | 260  | 13528 | 2.58430973 | 0.99185909 | 0.05261955 | 3.58624037 |
| GOTERM_BP_FAT   | GO:0051329~interphase of mitotic cell cycle             | 9  | 2.25  | 0.002090951 | 204315_S_AT, 219534_X_AT, ; | 302 | 103  | 13528 | 3.91410017 | 0.99192037 | 0.05212997 | 3.59177108 |
| GOTERM_BP_FAT   | GO:0030902~hindbrain development                        | 7  | 1.75  | 0.002107646 | 205453_AT, 211466_AT, 20331 | 302 | 60   | 13528 | 5.22604857 | 0.99222561 | 0.05197343 | 3.61995238 |
| GOTERM_BP_FAT   | GO:0035239~tube morphogenesis                           | 10 | 2.5   | 0.002122309 | 213373_S_AT, 209757_S_AT, ; | 302 | 127  | 13528 | 3.52714189 | 0.99248419 | 0.05177198 | 3.64469801 |
| GOTERM_BP_FAT   | GO:0045786~negative regulation of cell cycle            | 8  | 2     | 0.002145553 | 202730_S_AT, 212593_S_AT, ; | 302 | 81   | 13528 | 4.4241681  | 0.99287659 | 0.05177669 | 3.68391337 |
| GOTERM_BP_FAT   | GO:0006928~cell motion                                  | 22 | 5.5   | 0.002198755 | 202540_S_AT, 209119_X_AT, ; | 302 | 475  | 13528 | 2.07470199 | 0.99369938 | 0.05247825 | 3.77361501 |
| GOTERM_BP_FAT   | GO:0050866~negative regulation of cell activation       | 7  | 1.75  | 0.002294745 | 204781_S_AT, 215719_X_AT, ; | 302 | 61   | 13528 | 5.14037564 | 0.99495105 | 0.05414803 | 3.93526016 |
| GOTERM_BP_FAT   | GO:0045893~positive regulation of transcription, DNA-c  | 22 | 5.5   | 0.002328356 | 209199_S_AT, 209119_X_AT, ; | 302 | 477  | 13528 | 2.06600303 | 0.99532779 | 0.05436359 | 3.99179826 |
| GOTERM_BP_FAT   | GO:0043434~response to peptide hormone stimulus         | 11 | 2.75  | 0.0023457   | 205498_AT, 204154_AT, 21151 | 302 | 154  | 13528 | 3.19962157 | 0.99551109 | 0.05420888 | 4.02096236 |
| SP_PIR_KEYWORDS | ubcl conjugation                                        | 24 | 6     | 0.002433085 | 209199_S_AT, 220183_S_AT, ; | 395 | 588  | 19235 | 1.9876001  | 0.54361019 | 0.06882665 | 3.23686504 |
| GOTERM_BP_FAT   | GO:0045766~positive regulation of angiogenesis          | 5  | 1.25  | 0.002439978 | 209710_AT, 200921_S_AT, 201 | 302 | 26   | 13528 | 8.61436577 | 0.98738872 | 0.05576918 | 4.1793416  |
| GOTERM_CC_FAT   | GO:0005819~spindle                                      | 10 | 2.5   | 0.002466136 | 214250_AT, 200747_S_AT, 201 | 252 | 147  | 12782 | 3.45049131 | 0.51970125 | 0.11505032 | 3.24083751 |
| GOTERM_BP_FAT   | GO:0043066~negative regulation of apoptosis             | 18 | 4.5   | 0.002477981 | 222108_AT, 209199_S_AT, 211 | 302 | 354  | 13528 | 2.27769671 | 0.99669193 | 0.05605825 | 4.24311358 |
| GOTERM_BP_FAT   | GO:0000122~negative regulation of transcription from f  | 15 | 3.75  | 0.002576421 | 209199_S_AT, 209121_X_AT, ; | 302 | 266  | 13528 | 2.52601703 | 0.99736421 | 0.05765688 | 4.40811738 |
| GOTERM_BP_FAT   | GO:0051254~positive regulation of RNA metabolic proc    | 22 | 5.5   | 0.00259769  | 209199_S_AT, 209119_X_AT, ; | 302 | 481  | 13528 | 2.04882213 | 0.99749048 | 0.05756072 | 4.44373294 |
| GOTERM_BP_FAT   | GO:0045892~negative regulation of transcription, DNA-   | 18 | 4.5   | 0.002622522 | 209199_S_AT, 209119_X_AT, ; | 302 | 356  | 13528 | 2.26490066 | 0.99763026 | 0.05754252 | 4.48529979 |
| GOTERM_BP_FAT   | GO:0001656~metanephros development                      | 6  | 1.5   | 0.002814976 | 212558_AT, 206382_S_AT, 211 | 302 | 44   | 13528 | 6.10836845 | 0.99848025 | 0.06105846 | 4.80687034 |
| GOTERM_BP_FAT   | GO:0051347~positive regulation of transferase activity  | 14 | 3.5   | 0.00282989  | 205498_AT, 207574_S_AT, 201 | 302 | 240  | 13528 | 2.61302428 | 0.99853169 | 0.06080046 | 4.83174713 |
| GOTERM_BP_FAT   | GO:0021569~rhombomere 3 development                     | 3  | 0.75  | 0.00287422  | 205453_AT, 214639_S_AT, 211 | 302 | 4    | 13528 | 33.5960265 | 0.99867452 | 0.06115472 | 4.90565522 |
| GOTERM_BP_FAT   | GO:0060428~lung epithelium development                  | 3  | 0.75  | 0.00287422  | 213844_AT, 210002_AT, 2115  | 302 | 4    | 13528 | 33.5960265 | 0.99867452 | 0.06115472 | 4.90565522 |
| GOTERM_BP_FAT   | GO:0048562~embryonic organ morphogenesis                | 10 | 2.5   | 0.002904061 | 205453_AT, 213844_AT, 20621 | 302 | 133  | 13528 | 3.36802271 | 0.99876276 | 0.06120598 | 4.95537584 |
| GOTERM_CC_FAT   | GO:0043233~organelle lumen                              | 53 | 13.25 | 0.002987676 | 205909_AT, 218006_S_AT, 201 | 252 | 1820 | 12782 | 1.4770757  | 0.58879688 | 0.11922455 | 3.91364382 |
| GOTERM_BP_FAT   | GO:0010557~positive regulation of macromolecule bios    | 27 | 6.75  | 0.003048248 | 209199_S_AT, 209121_X_AT, ; | 302 | 654  | 13528 | 1.84932256 | 0.9991131  | 0.06356972 | 5.19527466 |
| GOTERM_BP_FAT   | GO:0032583~regulation of gene-specific transcription    | 10 | 2.5   | 0.003053986 | 209199_S_AT, 203920_AT, 201 | 302 | 134  | 13528 | 3.34288821 | 0.99912478 | 0.06311501 | 5.2048106  |
| GOTERM_BP_FAT   | GO:0051253~negative regulation of RNA metabolic proc    | 18 | 4.5   | 0.003112887 | 209199_S_AT, 209119_X_AT, ; | 302 | 362  | 13528 | 2.22736087 | 0.99923608 | 0.06372349 | 5.30263715 |
| GOTERM_BP_FAT   | GO:0001655~urogenital system development                | 9  | 2.25  | 0.003153978 | 219658_AT, 212558_AT, 20631 | 302 | 110  | 13528 | 3.66502107 | 0.99930523 | 0.06397067 | 5.37082684 |
| GOTERM_BP_FAT   | GO:0043193~positive regulation of gene-specific transci | 8  | 2     | 0.003221301 | 209199_S_AT, 203920_AT, 201 | 302 | 87   | 13528 | 4.11905306 | 0.99940527 | 0.06472396 | 5.48244837 |
| GOTERM_BP_FAT   | GO:0016481~negative regulation of transcription         | 21 | 5.25  | 0.003306334 | 209199_S_AT, 209119_X_AT, ; | 302 | 459  | 13528 | 2.04943081 | 0.99951131 | 0.06580451 | 5.6232549  |
| GOTERM_BP_FAT   | GO:0048015~phosphoinositide-mediated signaling          | 8  | 2     | 0.003434652 | 206638_AT, 201042_AT, 20411 | 302 | 88   | 13528 | 4.07224564 | 0.99963666 | 0.06769015 | 5.83536353 |
| GOTERM_MF_FAT   | GO:0008022~protein C-terminus binding                   | 10 | 2.5   | 0.003565776 | 215023_S_AT, 202870_S_AT, ; | 282 | 141  | 12983 | 3.26517781 | 0.85365899 | 0.24008227 | 5.06426743 |
| GOTERM_BP_FAT   | GO:0043065~positive regulation of apoptosis             | 20 | 5     | 0.00356642  | 213373_S_AT, 215719_X_AT, ; | 302 | 430  | 13528 | 2.08347451 | 0.99973201 | 0.06960437 | 6.052708   |
| GOTERM_BP_FAT   | GO:0002520~immune system development                    | 15 | 3.75  | 0.003588595 | 213373_S_AT, 215719_X_AT, ; | 302 | 276  | 13528 | 2.43449467 | 0.9997454  | 0.06943515 | 6.08923846 |
| GOTERM_BP_FAT   | GO:0016477~cell migration                               | 15 | 3.75  | 0.003588595 | 202540_S_AT, 209119_X_AT, ; | 302 | 276  | 13528 | 2.43449467 | 0.9997454  | 0.06943515 | 6.08923846 |
| GOTERM_BP_FAT   | GO:0048870~cell motility                                | 16 | 4     | 0.003711773 | 202540_S_AT, 209119_X_AT, ; | 302 | 307  | 13528 | 2.3345773  | 0.99980846 | 0.07113933 | 6.29191096 |
| GOTERM_BP_FAT   | GO:0051674~localization of cell                         | 16 | 4     | 0.003711773 | 202540_S_AT, 209119_X_AT, ; | 302 | 307  | 13528 | 2.3345773  | 0.99980846 | 0.07113933 | 6.29191096 |

|                 |                                                        |     |       |             |                             |     |      |       |            |            |            |            |
|-----------------|--------------------------------------------------------|-----|-------|-------------|-----------------------------|-----|------|-------|------------|------------|------------|------------|
| GOTERM_BP_FAT   | GO:0043086~negative regulation of catalytic activity   | 15  | 3.75  | 0.003723176 | 202540_S_AT, 202730_S_AT, ; | 302 | 277  | 13528 | 2.42570588 | 0.99981344 | 0.07076256 | 6.31065294 |
| GOTERM_BP_FAT   | GO:0045941~positive regulation of transcription        | 24  | 6     | 0.003824882 | 209199_S_AT, 209119_X_AT, ; | 302 | 564  | 13528 | 1.90615753 | 0.99985251 | 0.07203446 | 6.47765446 |
| KEGG_PATHWAY    | hsa05200:Pathways in cancer                            | 18  | 4.5   | 0.003830797 | 213373_S_AT, 215719_X_AT, ; | 131 | 328  | 5085  | 2.13018991 | 0.373906   | 0.14451346 | 4.32290209 |
| GOTERM_BP_FAT   | GO:0043068~positive regulation of programmed cell de   | 20  | 5     | 0.003844878 | 213373_S_AT, 215719_X_AT, ; | 302 | 433  | 13528 | 2.06903935 | 0.99985917 | 0.07181179 | 6.51045583 |
| GOTERM_BP_FAT   | GO:0010564~regulation of cell cycle process            | 9   | 2.25  | 0.003926748 | 204315_S_AT, 207069_S_AT, ; | 302 | 114  | 13528 | 3.53642384 | 0.99988345 | 0.07269839 | 6.64463775 |
| GOTERM_BP_FAT   | GO:0045944~positive regulation of transcription from R | 18  | 4.5   | 0.003948625 | 209199_S_AT, 203394_S_AT, ; | 302 | 371  | 13528 | 2.17332786 | 0.99988919 | 0.07250741 | 6.68046216 |
| GOTERM_BP_FAT   | GO:0033554~cellular response to stress                 | 24  | 6     | 0.004005772 | 204315_S_AT, 205875_S_AT, ; | 302 | 566  | 13528 | 1.89942199 | 0.9999029  | 0.07293919 | 6.77398359 |
| GOTERM_MF_FAT   | GO:0003707~steroid hormone receptor activity           | 6   | 1.5   | 0.004014532 | 203920_AT, 209119_X_AT, 20: | 282 | 49   | 12983 | 5.63742944 | 0.88515422 | 0.23701785 | 5.68440849 |
| GOTERM_BP_FAT   | GO:0045638~negative regulation of myeloid cell differe | 5   | 1.25  | 0.004171651 | 203332_S_AT, 205883_AT, 20: | 302 | 30   | 13528 | 7.46578366 | 0.99993383 | 0.07525534 | 7.04494377 |
| GOTERM_CC_FAT   | GO:0000922~spindle pole                                | 5   | 1.25  | 0.004237701 | 214250_AT, 200747_S_AT, 20: | 252 | 34   | 12782 | 7.45915033 | 0.71670638 | 0.14585894 | 5.5086445  |
| SP_PIR_KEYWORDS | kinase                                                 | 26  | 6.5   | 0.004274984 | 210754_S_AT, 211580_S_AT, ; | 395 | 688  | 19235 | 1.84026347 | 0.74829451 | 0.10859638 | 5.62242071 |
| GOTERM_BP_FAT   | GO:0007169~transmembrane receptor protein tyrosine     | 13  | 3.25  | 0.0044294   | 205805_S_AT, 205498_AT, 21: | 302 | 224  | 13528 | 2.59969253 | 0.99996353 | 0.07910782 | 7.46449772 |
| GOTERM_BP_FAT   | GO:0045637~regulation of myeloid cell differentiation  | 7   | 1.75  | 0.004589714 | 204781_S_AT, 215719_X_AT, ; | 302 | 70   | 13528 | 4.4794702  | 0.99997483 | 0.08122934 | 7.72455081 |
| GOTERM_BP_FAT   | GO:0030099~myeloid cell differentiation                | 8   | 2     | 0.004667144 | 213373_S_AT, 210754_S_AT, ; | 302 | 93   | 13528 | 3.8533077  | 0.99997896 | 0.08191709 | 7.8499055  |
| GOTERM_CC_FAT   | GO:0070013~intracellular organelle lumen               | 51  | 12.75 | 0.00505116  | 205909_AT, 218006_S_AT, 20: | 252 | 1779 | 12782 | 1.45409406 | 0.77775976 | 0.15389406 | 6.53340596 |
| SP_PIR_KEYWORDS | chromosomal rearrangement                              | 14  | 3.5   | 0.005163877 | 204917_S_AT, 205529_S_AT, ; | 395 | 279  | 19235 | 2.44353704 | 0.81120176 | 0.12035481 | 6.7540908  |
| GOTERM_MF_FAT   | GO:0016538~cyclin-dependent protein kinase regulator   | 4   | 1     | 0.005447124 | 213348_AT, 219534_X_AT, 20: | 282 | 17   | 12983 | 10.8327076 | 0.94705826 | 0.27856069 | 7.63897057 |
| SP_PIR_KEYWORDS | Apoptosis                                              | 17  | 4.25  | 0.00555315  | 213373_S_AT, 212354_AT, 20: | 395 | 381  | 19235 | 2.17279644 | 0.83367286 | 0.12029566 | 7.24844397 |
| GOTERM_BP_FAT   | GO:0014070~response to organic cyclic substance        | 9   | 2.25  | 0.005622073 | 205498_AT, 210754_S_AT, 20: | 302 | 121  | 13528 | 3.33183734 | 0.99999769 | 0.09714484 | 9.38275204 |
| GOTERM_BP_FAT   | GO:0043200~response to amino acid stimulus             | 4   | 1     | 0.005883921 | 204154_AT, 210754_S_AT, 20: | 302 | 17   | 13528 | 10.5399299 | 0.99999874 | 0.10069333 | 9.79885059 |
| GOTERM_CC_FAT   | GO:0015630~microtubule cytoskeleton                    | 21  | 5.25  | 0.005886059 | 204315_S_AT, 203362_S_AT, ; | 252 | 549  | 12782 | 1.94019429 | 0.82680284 | 0.16082202 | 7.5744766  |
| GOTERM_BP_FAT   | GO:0001709~cell fate determination                     | 5   | 1.25  | 0.005912566 | 209710_AT, 203394_S_AT, 21: | 302 | 33   | 13528 | 6.78707606 | 0.99999882 | 0.10041584 | 9.84426043 |
| GOTERM_MF_FAT   | GO:0033293~monocarboxylic acid binding                 | 6   | 1.5   | 0.006101129 | 209238_AT, 216985_S_AT, 20: | 282 | 54   | 12983 | 5.11544523 | 0.96283774 | 0.28053411 | 8.51866574 |
| GOTERM_BP_FAT   | GO:0060284~regulation of cell development              | 12  | 3     | 0.006171408 | 210754_S_AT, 203394_S_AT, ; | 302 | 205  | 13528 | 2.6221289  | 0.99999935 | 0.10382539 | 10.253617  |
| GOTERM_BP_FAT   | GO:0009967~positive regulation of signal transduction  | 15  | 3.75  | 0.006409834 | 213373_S_AT, 205498_AT, 21: | 302 | 295  | 13528 | 2.27796671 | 0.99999963 | 0.10684886 | 10.6291332 |
| GOTERM_BP_FAT   | GO:0019932~second-messenger-mediated signaling         | 13  | 3.25  | 0.006445727 | 212183_AT, 201042_AT, 2027: | 302 | 235  | 13528 | 2.47800479 | 0.99999966 | 0.10664694 | 10.6855361 |
| GOTERM_MF_FAT   | GO:0032405~MutLalpha complex binding                   | 3   | 0.75  | 0.00666105  | 205875_S_AT, 201202_AT, 20: | 282 | 6    | 12983 | 23.0195035 | 0.971795   | 0.27702954 | 9.19840215 |
| GOTERM_BP_FAT   | GO:0000079~regulation of cyclin-dependent protein kin  | 6   | 1.5   | 0.006847516 | 219863_AT, 203725_AT, 213:  | 302 | 54   | 13528 | 4.97718911 | 0.99999986 | 0.11212677 | 11.3146238 |
| GOTERM_BP_FAT   | GO:0032355~response to estradiol stimulus              | 6   | 1.5   | 0.006847516 | 205498_AT, 204200_S_AT, 21: | 302 | 54   | 13528 | 4.97718911 | 0.99999986 | 0.11212677 | 11.3146238 |
| UP_SEQ_FEATURE  | splice variant                                         | 179 | 44.75 | 0.006877948 | 202540_S_AT, 205875_S_AT, ; | 395 | 7458 | 19113 | 1.16134811 | 0.9997796  | 0.93959573 | 10.5783395 |
| GOTERM_CC_FAT   | GO:0005829~cytosol                                     | 40  | 10    | 0.006912409 | 211580_S_AT, 210754_S_AT, ; | 252 | 1330 | 12782 | 1.52548037 | 0.87256054 | 0.17079103 | 8.8395761  |
| GOTERM_BP_FAT   | GO:0010647~positive regulation of cell communication   | 16  | 4     | 0.006953453 | 213373_S_AT, 205498_AT, 21: | 302 | 329  | 13528 | 2.17846575 | 0.99999989 | 0.11296544 | 11.4797934 |
| GOTERM_BP_FAT   | GO:0006350~transcription                               | 64  | 16    | 0.00708959  | 213625_AT, 221213_S_AT, 21: | 302 | 2101 | 13528 | 1.3645221  | 0.99999992 | 0.11425059 | 11.6916234 |
| GOTERM_BP_FAT   | GO:0048706~embryonic skeletal system development       | 7   | 1.75  | 0.007297355 | 205453_AT, 213844_AT, 2062: | 302 | 77   | 13528 | 4.07224564 | 0.99999995 | 0.11659484 | 12.0139859 |
| SP_PIR_KEYWORDS | tumor suppressor                                       | 9   | 2.25  | 0.007307369 | 202730_S_AT, 219534_X_AT, ; | 395 | 137  | 19235 | 3.1990206  | 0.90573184 | 0.1456726  | 9.43153983 |
| GOTERM_BP_FAT   | GO:0006468~protein amino acid phosphorylation          | 26  | 6.5   | 0.007500993 | 210754_S_AT, 207574_S_AT, ; | 302 | 667  | 13528 | 1.74612032 | 0.99999997 | 0.11883789 | 12.3288685 |
| SP_PIR_KEYWORDS | SH2 domain                                             | 8   | 2     | 0.007887054 | 209682_AT, 211580_S_AT, 20: | 395 | 111  | 19235 | 3.50963622 | 0.92189486 | 0.14730743 | 10.1432988 |
| GOTERM_MF_FAT   | GO:0008134~transcription factor binding                | 21  | 5.25  | 0.008021558 | 209119_X_AT, 209121_X_AT, ; | 282 | 513  | 12983 | 1.88463772 | 0.9868719  | 0.30307908 | 11.0569245 |
| GOTERM_BP_FAT   | GO:0048736~appendage development                       | 8   | 2     | 0.00809741  | 209119_X_AT, 209121_X_AT, ; | 302 | 103  | 13528 | 3.47920015 | 0.99999999 | 0.12682915 | 13.2449992 |
| GOTERM_BP_FAT   | GO:0060173~limb development                            | 8   | 2     | 0.00809741  | 209119_X_AT, 209121_X_AT, ; | 302 | 103  | 13528 | 3.47920015 | 0.99999999 | 0.12682915 | 13.2449992 |
| SP_PIR_KEYWORDS | bromodomain                                            | 5   | 1.25  | 0.008100216 | 209762_X_AT, 209049_S_AT, ; | 395 | 39   | 19235 | 6.24310289 | 0.92711633 | 0.14277289 | 10.4037221 |
| SP_PIR_KEYWORDS | alternative splicing                                   | 178 | 44.5  | 0.008231412 | 202540_S_AT, 205875_S_AT, ; | 395 | 7488 | 19235 | 1.15757533 | 0.93015549 | 0.13744831 | 10.5636559 |
| GOTERM_BP_FAT   | GO:0048704~embryonic skeletal system morphogenesis     | 6   | 1.5   | 0.008591381 | 205453_AT, 213844_AT, 2062: | 302 | 57   | 13528 | 4.71523179 | 1          | 0.13315741 | 13.9969245 |
| INTERPRO        | IPR002087:Anti-proliferative protein                   | 3   | 0.75  | 0.008667304 | 200921_S_AT, 200920_S_AT, ; | 352 | 7    | 16659 | 20.2828734 | 0.99764222 | 0.86690306 | 12.2915596 |
| GOTERM_MF_FAT   | GO:0005504~fatty acid binding                          | 5   | 1.25  | 0.008891936 | 209238_AT, 216985_S_AT, 20: | 282 | 38   | 12983 | 6.05776409 | 0.99181341 | 0.30901363 | 12.1855813 |
| INTERPRO        | IPR000980:SH2 motif                                    | 8   | 2     | 0.009098028 | 209682_AT, 211580_S_AT, 20: | 352 | 111  | 16659 | 3.41093366 | 0.99825686 | 0.79566967 | 12.8639566 |
| GOTERM_MF_FAT   | GO:0008289~lipid binding                               | 19  | 4.75  | 0.009337156 | 209238_AT, 203504_S_AT, 21: | 282 | 450  | 12983 | 1.94386919 | 0.99357134 | 0.30267189 | 12.7577474 |
| UP_SEQ_FEATURE  | nucleotide phosphate-binding region:ATP                | 32  | 8     | 0.009337748 | 210754_S_AT, 218935_AT, 20: | 395 | 962  | 19113 | 1.60955815 | 0.9999893  | 0.94281098 | 14.09959   |
| SP_PIR_KEYWORDS | dna replication                                        | 7   | 1.75  | 0.009415859 | 203209_AT, 221521_S_AT, 20: | 395 | 88   | 19235 | 3.87356157 | 0.95246413 | 0.14813741 | 11.9956564 |
| GOTERM_BP_FAT   | GO:0006259~DNA metabolic process                       | 21  | 5.25  | 0.009459698 | 205875_S_AT, 45633_AT, 201: | 302 | 506  | 13528 | 1.85906866 | 1          | 0.14468447 | 15.3038125 |
| GOTERM_BP_FAT   | GO:0001945~lymph vessel development                    | 3   | 0.75  | 0.009623897 | 209121_X_AT, 209119_X_AT, ; | 302 | 7    | 13528 | 19.1977294 | 1          | 0.14605033 | 15.5488309 |
| GOTERM_BP_FAT   | GO:0021783~preganglionic parasympathetic nervous sy    | 3   | 0.75  | 0.009623897 | 205453_AT, 203394_S_AT, 21: | 302 | 7    | 13528 | 19.1977294 | 1          | 0.14605033 | 15.5488309 |
| GOTERM_CC_FAT   | GO:0005730~nucleolus                                   | 24  | 6     | 0.01047522  | 213373_S_AT, 219534_X_AT, ; | 252 | 698  | 12782 | 1.74403056 | 0.95617496 | 0.22943338 | 13.1079146 |

|                 |                                                       |    |       |             |                             |     |      |       |            |            |            |            |
|-----------------|-------------------------------------------------------|----|-------|-------------|-----------------------------|-----|------|-------|------------|------------|------------|------------|
| GOTERM_BP_FAT   | GO:0014075~response to amine stimulus                 | 5  | 1.25  | 0.01071195  | 204154_AT, 210754_S_AT, 20: | 302 | 39   | 13528 | 5.74291051 | 1          | 0.16019963 | 17.1556186 |
| GOTERM_BP_FAT   | GO:0048545~response to steroid hormone stimulus       | 11 | 2.75  | 0.01086074  | 204154_AT, 215719_X_AT, 20: | 302 | 192  | 13528 | 2.56636313 | 1          | 0.16120712 | 17.3730907 |
| GOTERM_CC_FAT   | GO:0000775~chromosome, centromeric region             | 8  | 2     | 0.011162305 | 212709_AT, 204739_AT, 2033: | 252 | 124  | 12782 | 3.27240143 | 0.9643443  | 0.22620609 | 13.9094866 |
| GOTERM_MF_FAT   | GO:0032404~mismatch repair complex binding            | 3  | 0.75  | 0.01199129  | 205875_S_AT, 201202_AT, 20: | 282 | 8    | 12983 | 17.2646277 | 0.99848192 | 0.35123652 | 16.097251  |
| GOTERM_BP_FAT   | GO:0030071~regulation of mitotic metaphase/anaphase   | 4  | 1     | 0.012278198 | 203764_AT, 203362_S_AT, 21: | 302 | 22   | 13528 | 8.14449127 | 1          | 0.17921624 | 19.4180487 |
| SP_PIR_KEYWORDS | nucleotide-binding                                    | 49 | 12.25 | 0.012371987 | 203504_S_AT, 202869_AT, 21: | 395 | 1686 | 19235 | 1.41525144 | 0.98184172 | 0.1816224  | 15.4775245 |
| SP_PIR_KEYWORDS | transferase                                           | 42 | 10.5  | 0.012514509 | 202869_AT, 210754_S_AT, 20: | 395 | 1394 | 19235 | 1.46717396 | 0.98266624 | 0.17560043 | 15.6421256 |
| GOTERM_BP_FAT   | GO:0043085~positive regulation of catalytic activity  | 21 | 5.25  | 0.012521135 | 207574_S_AT, 205698_S_AT, ; | 302 | 520  | 13528 | 1.80901681 | 1          | 0.18130101 | 19.7637051 |
| GOTERM_BP_FAT   | GO:0048486~parasympathetic nervous system developi    | 3  | 0.75  | 0.012644486 | 205453_AT, 203394_S_AT, 21: | 302 | 8    | 13528 | 16.7980132 | 1          | 0.18179172 | 19.938678  |
| KEGG_PATHWAY    | hsa03030:DNA replication                              | 5  | 1.25  | 0.01275637  | 203209_AT, 205053_AT, 2012: | 131 | 36   | 5085  | 5.39122137 | 0.79118124 | 0.32400672 | 13.7411416 |
| GOTERM_BP_FAT   | GO:0030326~embryonic limb morphogenesis               | 7  | 1.75  | 0.012942118 | 221884_AT, 214466_AT, 2050: | 302 | 87   | 13528 | 3.60417142 | 1          | 0.18453333 | 20.3593839 |
| GOTERM_BP_FAT   | GO:0035113~embryonic appendage morphogenesis          | 7  | 1.75  | 0.012942118 | 221884_AT, 214466_AT, 2050: | 302 | 87   | 13528 | 3.60417142 | 1          | 0.18453333 | 20.3593839 |
| GOTERM_BP_FAT   | GO:0010243~response to organic nitrogen               | 6  | 1.5   | 0.012955579 | 204154_AT, 210754_S_AT, 20: | 302 | 63   | 13528 | 4.26616209 | 1          | 0.18358176 | 20.3783624 |
| SMART           | SMO0099:btg1                                          | 3  | 0.75  | 0.013067937 | 200921_S_AT, 200920_S_AT, ; | 238 | 7    | 9079  | 16.3487395 | 0.91566563 | 0.91566563 | 15.0579681 |
| UP_SEQ_FEATURE  | DNA-binding region:Nuclear receptor                   | 5  | 1.25  | 0.013622366 | 209121_X_AT, 209119_X_AT, ; | 395 | 45   | 19113 | 5.37637131 | 0.99999995 | 0.96479983 | 19.9243455 |
| UP_SEQ_FEATURE  | zinc finger region:NR C4-type                         | 5  | 1.25  | 0.013622366 | 209121_X_AT, 209119_X_AT, ; | 395 | 45   | 19113 | 5.37637131 | 0.99999995 | 0.96479983 | 19.9243455 |
| GOTERM_BP_FAT   | GO:0051129~negative regulation of cellular component  | 9  | 2.25  | 0.014101024 | 207069_S_AT, 203920_AT, 20: | 302 | 142  | 13528 | 2.83910083 | 1          | 0.19700491 | 21.97774   |
| GOTERM_CC_FAT   | GO:0005654~nucleoplasm                                | 28 | 7     | 0.014322213 | 209199_S_AT, 208965_S_AT, ; | 252 | 882  | 12782 | 1.61022928 | 0.98621883 | 0.26363717 | 17.5086175 |
| SP_PIR_KEYWORDS | atp-binding                                           | 40 | 10    | 0.014529574 | 203504_S_AT, 202869_AT, 21: | 395 | 1326 | 19235 | 1.46896539 | 0.9910208  | 0.19282936 | 17.9378181 |
| GOTERM_BP_FAT   | GO:0048754~branching morphogenesis of a tube          | 6  | 1.5   | 0.014691292 | 211919_S_AT, 213844_AT, 20: | 302 | 65   | 13528 | 4.13489557 | 1          | 0.20318674 | 22.7900536 |
| GOTERM_BP_FAT   | GO:0007093~mitotic cell cycle checkpoint              | 5  | 1.25  | 0.015001166 | 204315_S_AT, 213226_AT, 20: | 302 | 43   | 13528 | 5.20868628 | 1          | 0.20580476 | 23.2132964 |
| GOTERM_BP_FAT   | GO:0001101~response to acid                           | 4  | 1     | 0.015619421 | 204154_AT, 210754_S_AT, 20: | 302 | 24   | 13528 | 7.46578366 | 1          | 0.21212741 | 24.0512171 |
| INTERPRO        | IPR001628:Zinc finger, nuclear hormone receptor-type  | 5  | 1.25  | 0.015769926 | 209121_X_AT, 209119_X_AT, ; | 352 | 46   | 16659 | 5.14420702 | 0.99998407 | 0.89024313 | 21.296719  |
| SP_PIR_KEYWORDS | cytoplasm                                             | 86 | 21.5  | 0.016246138 | 210754_S_AT, 215723_S_AT, ; | 395 | 3332 | 19235 | 1.25686477 | 0.99487803 | 0.20492096 | 19.8476665 |
| GOTERM_BP_FAT   | GO:0060562~epithelial tube morphogenesis              | 6  | 1.5   | 0.016576386 | 213373_S_AT, 213844_AT, 21: | 302 | 67   | 13528 | 4.01146585 | 1          | 0.2223622  | 25.3312123 |
| INTERPRO        | IPR001723:Steroid hormone receptor                    | 5  | 1.25  | 0.016958213 | 209121_X_AT, 209119_X_AT, ; | 352 | 47   | 16659 | 5.0347558  | 0.99999312 | 0.86209259 | 22.71622   |
| GOTERM_BP_FAT   | GO:0014706~striated muscle tissue development         | 8  | 2     | 0.017002782 | 209121_X_AT, 209119_X_AT, ; | 302 | 119  | 13528 | 3.01140854 | 1          | 0.22612427 | 25.8949677 |
| GOTERM_BP_FAT   | GO:0006916~anti-apoptosis                             | 11 | 2.75  | 0.017079751 | 222108_AT, 209199_S_AT, 21: | 302 | 206  | 13528 | 2.39195011 | 1          | 0.22574429 | 25.9963033 |
| GOTERM_BP_FAT   | GO:0021675~nerve development                          | 4  | 1     | 0.017462848 | 205453_AT, 206382_S_AT, 20: | 302 | 25   | 13528 | 7.16715232 | 1          | 0.2289218  | 26.4987367 |
| UP_SEQ_FEATURE  | region of interest:Linker                             | 4  | 1     | 0.017624275 | 202540_S_AT, 209682_AT, 20: | 395 | 27   | 19113 | 7.16849508 | 1          | 0.97309808 | 25.0281902 |
| GOTERM_CC_FAT   | GO:0000776~kinetochore                                | 6  | 1.5   | 0.017629633 | 212709_AT, 204739_AT, 2033: | 252 | 77   | 12782 | 3.95238095 | 0.99492133 | 0.2968467  | 21.1262912 |
| GOTERM_BP_FAT   | GO:0001525~angiogenesis                               | 9  | 2.25  | 0.017687793 | 211919_S_AT, 213373_S_AT, ; | 302 | 148  | 13528 | 2.72400215 | 1          | 0.2302326  | 26.7922525 |
| UP_SEQ_FEATURE  | short sequence motif:Nuclear localization signal      | 14 | 3.5   | 0.01784254  | 204917_S_AT, 203588_S_AT, ; | 395 | 325  | 19113 | 2.0843778  | 1          | 0.95662087 | 25.2975825 |
| INTERPRO        | IPR000536:Nuclear hormone receptor, ligand-binding, c | 5  | 1.25  | 0.018201005 | 209121_X_AT, 209119_X_AT, ; | 352 | 48   | 16659 | 4.92986506 | 0.99999714 | 0.83858033 | 24.1752349 |
| INTERPRO        | IPR008946:Nuclear hormone receptor, ligand-binding    | 5  | 1.25  | 0.018201005 | 209121_X_AT, 209119_X_AT, ; | 352 | 48   | 16659 | 4.92986506 | 0.99999714 | 0.83858033 | 24.1752349 |
| GOTERM_MF_FAT   | GO:0003690~double-stranded DNA binding                | 7  | 1.75  | 0.018686295 | 208965_S_AT, 211466_AT, 20: | 282 | 97   | 12983 | 3.32240257 | 0.99996086 | 0.46967825 | 23.9997045 |
| GOTERM_MF_FAT   | GO:0004861~cyclin-dependent protein kinase inhibitor  | 3  | 0.75  | 0.018729681 | 213348_AT, 219534_X_AT, 20: | 282 | 10   | 12983 | 13.8117021 | 0.99996178 | 0.45028786 | 24.0485756 |
| GOTERM_BP_FAT   | GO:0048660~regulation of smooth muscle cell prolifera | 5  | 1.25  | 0.018838916 | 204200_S_AT, 201042_AT, 21: | 302 | 46   | 13528 | 4.86898935 | 1          | 0.24201692 | 28.2770638 |
| SP_PIR_KEYWORDS | golgi apparatus                                       | 21 | 5.25  | 0.018981648 | 212354_AT, 210754_S_AT, 20: | 395 | 588  | 19235 | 1.73915009 | 0.99791053 | 0.22672343 | 22.8063237 |
| SP_PIR_KEYWORDS | cyclin                                                | 5  | 1.25  | 0.019041477 | 216831_S_AT, 205529_S_AT, ; | 395 | 50   | 19235 | 4.86962025 | 0.99795116 | 0.21934291 | 22.8698879 |
| SP_PIR_KEYWORDS | coenzyme A                                            | 4  | 1     | 0.019122207 | 202540_S_AT, 214440_AT, 20: | 395 | 28   | 19235 | 6.95660036 | 0.99800474 | 0.21267546 | 22.9555817 |
| GOTERM_BP_FAT   | GO:0043583~ear development                            | 7  | 1.75  | 0.019251834 | 204967_AT, 206382_S_AT, 20: | 302 | 95   | 13528 | 3.30066225 | 1          | 0.24530815 | 28.8027242 |
| GOTERM_BP_FAT   | GO:0048729~tissue morphogenesis                       | 10 | 2.5   | 0.019436194 | 213373_S_AT, 205453_AT, 21: | 302 | 180  | 13528 | 2.48859455 | 1          | 0.24602157 | 29.0362465 |
| UP_SEQ_FEATURE  | domain:Bromo                                          | 4  | 1     | 0.01944385  | 209762_X_AT, 209049_S_AT, ; | 395 | 28   | 19113 | 6.9124774  | 1          | 0.94993302 | 27.2463901 |
| GOTERM_BP_FAT   | GO:0050673~epithelial cell proliferation              | 3  | 0.75  | 0.019733976 | 218326_S_AT, 205051_S_AT, ; | 302 | 10   | 13528 | 13.4384106 | 1          | 0.24797095 | 29.4119129 |
| GOTERM_BP_FAT   | GO:0016310~phosphorylation                            | 28 | 7     | 0.020129472 | 210754_S_AT, 207574_S_AT, ; | 302 | 800  | 13528 | 1.56781457 | 1          | 0.25095441 | 29.9079517 |
| GOTERM_BP_FAT   | GO:0007346~regulation of mitotic cell cycle           | 9  | 2.25  | 0.020416527 | 204315_S_AT, 207069_S_AT, ; | 302 | 152  | 13528 | 2.65231788 | 1          | 0.25272391 | 31.8629313 |
| PIR_SUPERFAMILY | PIRSF002612:homeotic protein Hox A5/D4                | 3  | 0.75  | 0.021638324 | 213844_AT, 206289_AT, 2056: | 174 | 10   | 7396  | 12.7517241 | 0.99187403 | 0.90985585 | 24.3056386 |
| GOTERM_BP_FAT   | GO:0060537~muscle tissue development                  | 8  | 2     | 0.021659425 | 209121_X_AT, 209119_X_AT, ; | 302 | 125  | 13528 | 2.86686093 | 1          | 0.26461801 | 31.7960751 |
| GOTERM_BP_FAT   | GO:0000077~DNA damage checkpoint                      | 5  | 1.25  | 0.021705652 | 204315_S_AT, 213226_AT, 21: | 302 | 48   | 13528 | 4.66611479 | 1          | 0.26373238 | 31.8523706 |
| GOTERM_BP_FAT   | GO:0044093~positive regulation of molecular function  | 22 | 5.5   | 0.021714328 | 207574_S_AT, 205698_S_AT, ; | 302 | 586  | 13528 | 1.68171236 | 1          | 0.2624639  | 31.8629313 |
| SP_PIR_KEYWORDS | activator                                             | 19 | 4.75  | 0.021782993 | 204917_S_AT, 209199_S_AT, ; | 395 | 520  | 19235 | 1.77928432 | 0.99916797 | 0.23099172 | 25.7311182 |
| GOTERM_BP_FAT   | GO:0035107~appendage morphogenesis                    | 7  | 1.75  | 0.023080882 | 221884_AT, 214466_AT, 2050: | 302 | 99   | 13528 | 3.16730216 | 1          | 0.27521918 | 33.5072392 |

|                 |                                                         |    |       |             |                             |     |      |       |             |            |            |            |
|-----------------|---------------------------------------------------------|----|-------|-------------|-----------------------------|-----|------|-------|-------------|------------|------------|------------|
| GOTERM_BP_FAT   | GO:0030324~lung development                             | 7  | 1.75  | 0.023080882 | 213844_AT,209757_S_AT,201   | 302 | 99   | 13528 | 3.16730216  | 1          | 0.27521918 | 33.5072392 |
| GOTERM_BP_FAT   | GO:0031508~limb morphogenesis                           | 7  | 1.75  | 0.023080882 | 221884_AT,214466_AT,20501   | 302 | 99   | 13528 | 3.16730216  | 1          | 0.27521918 | 33.5072392 |
| GOTERM_BP_FAT   | GO:0008015~blood circulation                            | 10 | 2.5   | 0.023462157 | 206638_AT,217518_AT,20541   | 302 | 186  | 13528 | 2.40831731  | 1          | 0.27770299 | 33.9592906 |
| GOTERM_BP_FAT   | GO:0003013~circulatory system process                   | 10 | 2.5   | 0.023462157 | 206638_AT,217518_AT,20541   | 302 | 186  | 13528 | 2.40831731  | 1          | 0.27770299 | 33.9592906 |
| GOTERM_MF_FAT   | GO:0017076~purine nucleotide binding                    | 55 | 13.75 | 0.023568173 | 219885_AT,203504_S_AT,201   | 282 | 1918 | 12983 | 1.32020093  | 0.99999732 | 0.50976005 | 29.318825  |
| GOTERM_BP_FAT   | GO:0045841~negative regulation of mitotic metaphase/    | 3  | 0.75  | 0.023769076 | 203362_S_AT,215509_S_AT,211 | 302 | 11   | 13528 | 12.21673669 | 1          | 0.27940328 | 34.3210758 |
| GOTERM_BP_FAT   | GO:0007094~mitotic cell cycle spindle assembly checkp.  | 3  | 0.75  | 0.023769076 | 203362_S_AT,215509_S_AT,211 | 302 | 11   | 13528 | 12.21673669 | 1          | 0.27940328 | 34.3210758 |
| GOTERM_BP_FAT   | GO:0007379~segment specification                        | 3  | 0.75  | 0.023769076 | 204917_S_AT,214457_AT,211   | 302 | 11   | 13528 | 12.21673669 | 1          | 0.27940328 | 34.3210758 |
| GOTERM_BP_FAT   | GO:0010627~regulation of protein kinase cascade         | 12 | 3     | 0.023879956 | 213373_S_AT,202730_S_AT,211 | 302 | 249  | 13528 | 2.15878082  | 1          | 0.27912262 | 34.4513173 |
| GOTERM_BP_FAT   | GO:0048872~homeostasis of number of cells               | 7  | 1.75  | 0.024112512 | 215719_X_AT,210754_S_AT,211 | 302 | 100  | 13528 | 3.13562914  | 1          | 0.2800546  | 34.7236911 |
| GOTERM_BP_FAT   | GO:0001763~morphogenesis of a branching structure       | 6  | 1.5   | 0.024417493 | 211919_S_AT,213844_AT,201   | 302 | 74   | 13528 | 3.63200286  | 1          | 0.28168914 | 35.0792733 |
| GOTERM_BP_FAT   | GO:0016202~regulation of striated muscle tissue develc  | 5  | 1.25  | 0.024825217 | 219743_AT,200921_S_AT,211   | 302 | 50   | 13528 | 4.4794702   | 1          | 0.28430608 | 35.5517939 |
| SP_PIR_KEYWORDS | cell cycle control                                      | 4  | 1     | 0.025086992 | 210567_S_AT,213226_AT,201   | 395 | 31   | 19235 | 6.28338097  | 0.9997201  | 0.25336654 | 29.0487217 |
| GOTERM_BP_FAT   | GO:0002009~morphogenesis of an epithelium               | 7  | 1.75  | 0.025174581 | 213373_S_AT,205453_AT,211   | 302 | 101  | 13528 | 3.10458331  | 1          | 0.28632016 | 35.9540978 |
| INTERPRO        | IPR017995:Homeobox protein, antennapedia type           | 3  | 0.75  | 0.025411989 | 213844_AT,206289_AT,20561   | 352 | 12   | 16659 | 11.8316761  | 0.99999998 | 0.89313635 | 32.145832  |
| INTERPRO        | IPR017970:Homeobox, conserved site                      | 11 | 2.75  | 0.025792709 | 205453_AT,213844_AT,21131   | 352 | 232  | 16659 | 2.24393858  | 0.99999999 | 0.86706663 | 32.5440955 |
| GOTERM_BP_FAT   | GO:0032101~regulation of response to external stimuli   | 9  | 2.25  | 0.025890417 | 210029_AT,204200_S_AT,201   | 302 | 159  | 13528 | 2.53554917  | 1          | 0.29181952 | 36.7710226 |
| SMART           | SM00252:SH2                                             | 8  | 2     | 0.025936538 | 209682_AT,211580_S_AT,201   | 238 | 111  | 9079  | 2.74933757  | 0.99284839 | 0.91543284 | 27.822256  |
| GOTERM_BP_FAT   | GO:0030323~respiratory tube development                 | 7  | 1.75  | 0.026267417 | 213844_AT,209757_S_AT,201   | 302 | 102  | 13528 | 3.07414621  | 1          | 0.29401323 | 37.1973021 |
| GOTERM_BP_FAT   | GO:0048634~regulation of muscle development             | 5  | 1.25  | 0.026481175 | 219743_AT,200921_S_AT,211   | 302 | 51   | 13528 | 4.39163745  | 1          | 0.29464013 | 37.4377961 |
| GOTERM_CC_FAT   | GO:0000777~condensed chromosome kinetochore             | 5  | 1.25  | 0.02693962  | 204739_AT,203362_S_AT,211   | 252 | 58   | 12782 | 4.37260536  | 0.99969973 | 0.39765564 | 30.5368183 |
| GOTERM_BP_FAT   | GO:0002521~leukocyte differentiation                    | 8  | 2     | 0.027134924 | 213373_S_AT,215719_X_AT,211 | 302 | 131  | 13528 | 2.73555432  | 1          | 0.29936889 | 38.1679369 |
| UP_SEQ_FEATURE  | compositionally biased region:Ser/Thr-rich              | 4  | 1     | 0.027720805 | 205805_S_AT,207480_S_AT,211 | 395 | 32   | 19113 | 6.04841772  | 1          | 0.97786899 | 36.5816565 |
| INTERPRO        | IPR001356:Homeobox                                      | 11 | 2.75  | 0.027773243 | 205453_AT,213844_AT,21131   | 352 | 235  | 16659 | 2.21529255  | 1          | 0.85879631 | 34.580923  |
| INTERPRO        | IPR011993:Pleckstrin homology-type                      | 13 | 3.25  | 0.027777478 | 215626_AT,206204_AT,20711   | 352 | 303  | 16659 | 2.03051868  | 1          | 0.83133955 | 34.5852158 |
| SP_PIR_KEYWORDS | Homeobox                                                | 11 | 2.75  | 0.02795348  | 205453_AT,213844_AT,21131   | 395 | 242  | 19235 | 2.21346375  | 0.99989155 | 0.27006566 | 31.8152787 |
| GOTERM_CC_FAT   | GO:0005815~microtubule organizing center                | 11 | 2.75  | 0.027970229 | 203362_S_AT,212675_S_AT,211 | 252 | 253  | 12782 | 2.20531401  | 0.9997808  | 0.39080718 | 31.5120568 |
| GOTERM_BP_FAT   | GO:0051784~negative regulation of nuclear division      | 3  | 0.75  | 0.028109502 | 203362_S_AT,215509_S_AT,211 | 302 | 12   | 13528 | 11.1986755  | 1          | 0.3069656  | 39.2414977 |
| GOTERM_BP_FAT   | GO:0031577~spindle checkpoint                           | 3  | 0.75  | 0.028109502 | 203362_S_AT,215509_S_AT,211 | 302 | 12   | 13528 | 11.1986755  | 1          | 0.3069656  | 39.2414977 |
| GOTERM_BP_FAT   | GO:0045839~negative regulation of mitosis               | 3  | 0.75  | 0.028109502 | 203362_S_AT,215509_S_AT,211 | 302 | 12   | 13528 | 11.1986755  | 1          | 0.3069656  | 39.2414977 |
| GOTERM_BP_FAT   | GO:0031570~DNA integrity checkpoint                     | 5  | 1.25  | 0.028201856 | 204315_S_AT,213226_AT,211   | 302 | 52   | 13528 | 4.30718288  | 1          | 0.30639586 | 39.3423152 |
| GOTERM_BP_FAT   | GO:0046620~regulation of organ growth                   | 4  | 1     | 0.028425262 | 219743_AT,213260_AT,20661   | 302 | 30   | 13528 | 5.97262693  | 1          | 0.30702178 | 39.5855415 |
| GOTERM_BP_FAT   | GO:0006954~inflammatory response                        | 14 | 3.5   | 0.029598698 | 204154_AT,210754_S_AT,211   | 302 | 325  | 13528 | 1.92961793  | 1          | 0.31615709 | 40.8480598 |
| GOTERM_BP_FAT   | GO:0051384~response to glucocorticoid stimulus          | 6  | 1.5   | 0.029813643 | 205498_AT,204781_S_AT,211   | 302 | 78   | 13528 | 3.44574631  | 1          | 0.31664243 | 41.0766098 |
| GOTERM_BP_FAT   | GO:0001889~liver development                            | 5  | 1.25  | 0.029987641 | 219658_AT,203394_S_AT,211   | 302 | 53   | 13528 | 4.22591528  | 1          | 0.31676183 | 41.2610114 |
| SP_PIR_KEYWORDS | developmental protein                                   | 25 | 6.25  | 0.030729674 | 209199_S_AT,207574_S_AT,211 | 395 | 779  | 19235 | 1.56277929  | 0.99995682 | 0.28466615 | 34.3991619 |
| GOTERM_CC_FAT   | GO:0005856~cytoskeleton                                 | 38 | 9.5   | 0.030942729 | 204315_S_AT,213373_S_AT,211 | 252 | 1381 | 12782 | 1.39568751  | 0.99991174 | 0.40465894 | 34.254366  |
| GOTERM_BP_FAT   | GO:0048661~positive regulation of smooth muscle cell j  | 4  | 1     | 0.030966493 | 204200_S_AT,201042_AT,211   | 302 | 31   | 13528 | 5.77996155  | 1          | 0.323901   | 42.2882912 |
| GOTERM_BP_FAT   | GO:0048732~gland development                            | 8  | 2     | 0.031267774 | 209710_AT,204154_AT,21384   | 302 | 135  | 13528 | 2.65450086  | 1          | 0.32507917 | 42.6010534 |
| SMART           | SM00399:ZnF_C4                                          | 5  | 1.25  | 0.031390457 | 209121_X_AT,209119_X_AT,211 | 238 | 46   | 9079  | 4.14641944  | 0.99751135 | 0.86448483 | 32.679244  |
| GOTERM_BP_FAT   | GO:0051250~negative regulation of lymphocyte activati   | 5  | 1.25  | 0.031838851 | 204781_S_AT,215719_X_AT,211 | 302 | 54   | 13528 | 4.14765759  | 1          | 0.32855054 | 43.1895122 |
| UP_SEQ_FEATURE  | binding site:ATP                                        | 19 | 4.75  | 0.032199029 | 210754_S_AT,218935_AT,201   | 395 | 542  | 19113 | 1.69623523  | 1          | 0.98155416 | 41.1515523 |
| GOTERM_BP_FAT   | GO:0050767~regulation of neurogenesis                   | 9  | 2.25  | 0.032313849 | 210754_S_AT,203394_S_AT,211 | 302 | 166  | 13528 | 2.42862842  | 1          | 0.33115756 | 43.6746305 |
| GOTERM_BP_FAT   | GO:0007423~sensory organ development                    | 11 | 2.75  | 0.032475226 | 213260_AT,203394_S_AT,201   | 302 | 229  | 13528 | 2.15171058  | 1          | 0.33109287 | 43.8385544 |
| GOTERM_BP_FAT   | GO:0010595~positive regulation of endothelial cell migr | 3  | 0.75  | 0.032739765 | 204200_S_AT,216061_X_AT,211 | 302 | 13   | 13528 | 10.3372389  | 1          | 0.33189291 | 44.1062968 |
| GOTERM_BP_FAT   | GO:0034605~cellular response to heat                    | 3  | 0.75  | 0.032739765 | 217518_AT,210754_S_AT,201   | 302 | 13   | 13528 | 10.3372389  | 1          | 0.33189291 | 44.1062968 |
| GOTERM_BP_FAT   | GO:0008045~motor axon guidance                          | 3  | 0.75  | 0.032739765 | 211919_S_AT,209201_X_AT,211 | 302 | 13   | 13528 | 10.3372389  | 1          | 0.33189291 | 44.1062968 |
| UP_SEQ_FEATURE  | binding site:Coenzyme A                                 | 3  | 0.75  | 0.032750509 | 214440_AT,204573_AT,20211   | 395 | 14   | 19113 | 10.3687161  | 1          | 0.97510631 | 41.6924467 |
| GOTERM_BP_FAT   | GO:0042770~DNA damage response, signal transductioi     | 6  | 1.5   | 0.032771983 | 204315_S_AT,213226_AT,201   | 302 | 80   | 13528 | 3.35960265  | 1          | 0.33074941 | 44.1388233 |
| GOTERM_BP_FAT   | GO:0010740~positive regulation of protein kinase casca  | 9  | 2.25  | 0.033312765 | 213373_S_AT,205498_AT,211   | 302 | 167  | 13528 | 2.41408574  | 1          | 0.33382999 | 44.6821146 |
| GOTERM_BP_FAT   | GO:0060541~respiratory system development               | 7  | 1.75  | 0.033487376 | 213844_AT,209757_S_AT,201   | 302 | 108  | 13528 | 2.90336031  | 1          | 0.33386324 | 44.8564698 |
| INTERPRO        | IPR004367:Cyclin, C-terminal                            | 3  | 0.75  | 0.034083503 | 213226_AT,219470_X_AT,211   | 352 | 14   | 16659 | 10.1414367  | 1          | 0.86580051 | 40.6941456 |
| GOTERM_MF_FAT   | GO:0032553~ribonucleotide binding                       | 52 | 13    | 0.034377928 | 219885_AT,203504_S_AT,201   | 282 | 1836 | 12983 | 1.30393702  | 0.99999999 | 0.62863289 | 39.8875174 |

|                 |                                                          |    |       |             |                             |     |      |       |            |            |            |            |
|-----------------|----------------------------------------------------------|----|-------|-------------|-----------------------------|-----|------|-------|------------|------------|------------|------------|
| GOTERM_MF_FAT   | GO:0032555~purine ribonucleotide binding                 | 52 | 13    | 0.034377928 | 219885_AT, 203504_S_AT, 20: | 282 | 1836 | 12983 | 1.30393702 | 0.99999999 | 0.62863289 | 39.8875174 |
| GOTERM_BP_FAT   | GO:0009615~response to virus                             | 7  | 1.75  | 0.034803751 | 211919_S_AT, 208965_S_AT, ; | 302 | 109  | 13528 | 2.87672398 | 1          | 0.34317552 | 46.1543358 |
| SP_PIR_KEYWORDS | repressor                                                | 16 | 4     | 0.034843099 | 208965_S_AT, 203394_S_AT, ; | 395 | 435  | 19235 | 1.79112469 | 0.99998902 | 0.30814177 | 38.0613526 |
| GOTERM_BP_FAT   | GO:0009314~response to radiation                         | 10 | 2.5   | 0.03515394  | 202540_S_AT, 203887_S_AT, ; | 302 | 200  | 13528 | 2.2397351  | 1          | 0.34457195 | 46.4947201 |
| GOTERM_BP_FAT   | GO:0009612~response to mechanical stimulus               | 5  | 1.25  | 0.035738545 | 201009_S_AT, 203688_AT, 20: | 302 | 56   | 13528 | 3.99952696 | 1          | 0.34781678 | 47.0584408 |
| GOTERM_BP_FAT   | GO:0007088~regulation of mitosis                         | 5  | 1.25  | 0.035738545 | 203764_AT, 203362_S_AT, 21: | 302 | 56   | 13528 | 3.99952696 | 1          | 0.34781678 | 47.0584408 |
| GOTERM_BP_FAT   | GO:0009408~response to heat                              | 5  | 1.25  | 0.035738545 | 217518_AT, 210754_S_AT, 20: | 302 | 56   | 13528 | 3.99952696 | 1          | 0.34781678 | 47.0584408 |
| GOTERM_BP_FAT   | GO:0051783~regulation of nuclear division                | 5  | 1.25  | 0.035738545 | 203764_AT, 203362_S_AT, 21: | 302 | 56   | 13528 | 3.99952696 | 1          | 0.34781678 | 47.0584408 |
| GOTERM_BP_FAT   | GO:0045165~cell fate commitment                          | 8  | 2     | 0.035803646 | 209710_AT, 209121_X_AT, 20: | 302 | 139  | 13528 | 2.57811234 | 1          | 0.34691566 | 47.1208684 |
| GOTERM_BP_FAT   | GO:0000187~activation of MAPK activity                   | 6  | 1.5   | 0.035907208 | 211919_S_AT, 205498_AT, 20: | 302 | 82   | 13528 | 3.27766112 | 1          | 0.34632569 | 47.2200347 |
| SMART           | SM00430:HOLI                                             | 5  | 1.25  | 0.03596385  | 209121_X_AT, 209119_X_AT, ; | 238 | 48   | 9079  | 3.97365196 | 0.99897778 | 0.82119238 | 36.5184435 |
| GOTERM_CC_FAT   | GO:0005794~Golgi apparatus                               | 26 | 6.5   | 0.036388325 | 203504_S_AT, 212354_AT, 21: | 252 | 872  | 12782 | 1.51235984 | 0.99998345 | 0.43977346 | 39.0164776 |
| GOTERM_MF_FAT   | GO:0031406~carboxylic acid binding                       | 8  | 2     | 0.037083545 | 209238_AT, 216985_S_AT, 21: | 282 | 144  | 12983 | 2.55772262 | 1          | 0.63814584 | 42.2920033 |
| GOTERM_BP_FAT   | GO:0009266~response to temperature stimulus              | 6  | 1.5   | 0.037541805 | 217518_AT, 210754_S_AT, 20: | 302 | 83   | 13528 | 3.23817123 | 1          | 0.35766114 | 48.7622142 |
| GOTERM_BP_FAT   | GO:0006263~negative regulation of immune system prc      | 6  | 1.5   | 0.037541805 | 204781_S_AT, 215719_X_AT, ; | 302 | 83   | 13528 | 3.23817123 | 1          | 0.35766114 | 48.7622142 |
| SP_PIR_KEYWORDS | peroxisome                                               | 6  | 1.5   | 0.037563861 | 202540_S_AT, 209424_S_AT, ; | 395 | 90   | 19235 | 3.2464135  | 0.99999558 | 0.31973212 | 40.3786274 |
| GOTERM_BP_FAT   | GO:0010552~positive regulation of specific transcription | 5  | 1.25  | 0.037787388 | 209199_S_AT, 209710_AT, 20: | 302 | 57   | 13528 | 3.92935982 | 1          | 0.35812608 | 48.9902078 |
| GOTERM_BP_FAT   | GO:0002695~negative regulation of leukocyte activator    | 5  | 1.25  | 0.037787388 | 204781_S_AT, 215719_X_AT, ; | 302 | 57   | 13528 | 3.92935982 | 1          | 0.35812608 | 48.9902078 |
| GOTERM_MF_FAT   | GO:0043566~structure-specific DNA binding                | 8  | 2     | 0.038275802 | 205875_S_AT, 208965_S_AT, ; | 282 | 145  | 12983 | 2.54008315 | 1          | 0.63206503 | 43.3228677 |
| GOTERM_BP_FAT   | GO:0051336~regulation of hydrolase activity              | 14 | 3.5   | 0.038838357 | 203920_AT, 207069_S_AT, 20: | 302 | 337  | 13528 | 1.8609075  | 1          | 0.36470994 | 49.9551432 |
| GOTERM_BP_FAT   | GO:0048705~skeletal system morphogenesis                 | 7  | 1.75  | 0.038951479 | 205498_AT, 205453_AT, 2138: | 302 | 112  | 13528 | 2.79966887 | 1          | 0.364135   | 50.0579728 |
| GOTERM_BP_FAT   | GO:0001932~regulation of protein amino acid phosphori    | 9  | 2.25  | 0.039749378 | 202730_S_AT, 207069_S_AT, ; | 302 | 173  | 13528 | 2.33036022 | 1          | 0.36868942 | 50.7776373 |
| GOTERM_MF_FAT   | GO:0003702~RNA polymerase II transcription factor act    | 11 | 2.75  | 0.039826903 | 209199_S_AT, 209119_X_AT, ; | 282 | 244  | 12983 | 2.07552901 | 1          | 0.62986014 | 44.6383409 |
| GOTERM_BP_FAT   | GO:0006261~DNA-dependent DNA replication                 | 5  | 1.25  | 0.039902374 | 205053_AT, 219258_AT, 2118: | 302 | 58   | 13528 | 3.86161224 | 1          | 0.36840108 | 50.9145102 |
| SP_PIR_KEYWORDS | kinetochore                                              | 5  | 1.25  | 0.040133511 | 204739_AT, 203362_S_AT, 21: | 395 | 65   | 19235 | 3.86477798 | 0.99999813 | 0.32946597 | 42.4932379 |
| GOTERM_CC_FAT   | GO:0000779~condensed chromosome, centromeric reg         | 5  | 1.25  | 0.040591881 | 204739_AT, 203362_S_AT, 21: | 252 | 66   | 12782 | 3.84259259 | 0.99999548 | 0.45955646 | 42.4719696 |
| GOTERM_BP_FAT   | GO:0031960~response to corticosteroid stimulus           | 6  | 1.5   | 0.04094606  | 205498_AT, 204781_S_AT, 21: | 302 | 85   | 13528 | 3.16197896 | 1          | 0.37466814 | 51.8386802 |
| GOTERM_BP_FAT   | GO:0032147~activation of protein kinase activity         | 7  | 1.75  | 0.041884161 | 205498_AT, 207574_S_AT, 20: | 302 | 114  | 13528 | 2.75055188 | 1          | 0.38005826 | 52.6553344 |
| GOTERM_BP_FAT   | GO:0050865~regulation of cell activation                 | 9  | 2.25  | 0.042067308 | 215719_X_AT, 203332_S_AT, ; | 302 | 175  | 13528 | 2.30372753 | 1          | 0.37994428 | 52.81324   |
| GOTERM_BP_FAT   | GO:0045216~cell-cell junction organization               | 4  | 1     | 0.042276017 | 40687_AT, 204904_AT, 20496: | 302 | 35   | 13528 | 5.11939451 | 1          | 0.3800148  | 52.99258   |
| GOTERM_BP_FAT   | GO:0007052~mitotic spindle organization                  | 3  | 0.75  | 0.042810495 | 204162_AT, 204444_AT, 2048: | 302 | 15   | 13528 | 8.9589404  | 1          | 0.38240403 | 53.4489208 |
| GOTERM_CC_FAT   | GO:0000785~chromatin                                     | 9  | 2.25  | 0.043805527 | 209757_S_AT, 219258_AT, 21: | 252 | 200  | 12782 | 2.2825     | 0.99999833 | 0.46927677 | 44.9905524 |
| SP_PIR_KEYWORDS | transcription factor                                     | 5  | 1.25  | 0.044210672 | 209199_S_AT, 209121_X_AT, ; | 395 | 65   | 19235 | 3.74586173 | 0.99999953 | 0.3483442  | 45.7063705 |
| GOTERM_BP_FAT   | GO:0009953~dorsal/ventral pattern formation              | 5  | 1.25  | 0.044330894 | 207069_S_AT, 205453_AT, 21: | 302 | 60   | 13528 | 3.73289183 | 1          | 0.39167845 | 54.7243167 |
| GOTERM_BP_FAT   | GO:0030193~regulation of blood coagulation               | 4  | 1     | 0.045384751 | 204200_S_AT, 216061_X_AT, ; | 302 | 36   | 13528 | 4.97718911 | 1          | 0.39753968 | 55.5889412 |
| GOTERM_BP_FAT   | GO:0043407~negative regulation of MAP kinase activity    | 4  | 1     | 0.045384751 | 202540_S_AT, 202730_S_AT, ; | 302 | 36   | 13528 | 4.97718911 | 1          | 0.39753968 | 55.5889412 |
| GOTERM_BP_FAT   | GO:0000070~mitotic sister chromatid segregation          | 4  | 1     | 0.045384751 | 203764_AT, 203362_S_AT, 20: | 302 | 36   | 13528 | 4.97718911 | 1          | 0.39753968 | 55.5889412 |
| GOTERM_MF_FAT   | GO:0030554~adenyl nucleotide binding                     | 45 | 11.25 | 0.045419756 | 219885_AT, 203504_S_AT, 20: | 282 | 1577 | 12983 | 1.31373197 | 1          | 0.66287831 | 49.149201  |
| PIR_SUPERFAMILY | PIRSF002610:homeotic protein Hox B2                      | 2  | 0.5   | 0.046237994 | 205453_AT, 214457_AT        | 174 | 2    | 7396  | 42.5057471 | 0.99997002 | 0.96893524 | 45.2626352 |
| KEGG_PATHWAY    | hsa04360:Axon guidance                                   | 8  | 2     | 0.046283207 | 211919_S_AT, 210056_AT, 20: | 131 | 129  | 5085  | 2.40724303 | 0.9969156  | 0.6853454  | 42.0515063 |
| SP_PIR_KEYWORDS | Endocytosis                                              | 6  | 1.5   | 0.047402123 | 205498_AT, 203887_S_AT, 20: | 395 | 96   | 19235 | 3.04351266 | 0.99999984 | 0.3603117  | 48.1046059 |
| UP_SEQ_FEATURE  | compositionally biased region:Poly-Pro                   | 15 | 3.75  | 0.048139975 | 201368_AT, 204917_S_AT, 36: | 395 | 413  | 19113 | 1.75740951 | 1          | 0.99336872 | 55.033876  |
| UP_SEQ_FEATURE  | domain:SH2                                               | 6  | 1.5   | 0.048473066 | 206204_AT, 210754_S_AT, 20: | 395 | 96   | 19113 | 3.02420886 | 1          | 0.99056152 | 55.2881102 |
| GOTERM_BP_FAT   | GO:0000819~sister chromatid segregation                  | 4  | 1     | 0.048603649 | 203764_AT, 203362_S_AT, 20: | 302 | 37   | 13528 | 4.84267049 | 1          | 0.41784538 | 58.1344698 |
| GOTERM_BP_FAT   | GO:0009611~response to wounding                          | 19 | 4.75  | 0.048783615 | 210754_S_AT, 221087_S_AT, ; | 302 | 530  | 13528 | 1.60584781 | 1          | 0.41755688 | 58.2726479 |
| GOTERM_BP_FAT   | GO:0006275~regulation of DNA replication                 | 5  | 1.25  | 0.049023819 | 204200_S_AT, 216061_X_AT, ; | 302 | 62   | 13528 | 3.61247597 | 1          | 0.41766807 | 58.4564063 |
| GOTERM_MF_FAT   | GO:0019207~kinase regulator activity                     | 6  | 1.5   | 0.051188795 | 213348_AT, 211580_S_AT, 21: | 282 | 93   | 12983 | 2.97025852 | 1          | 0.69207334 | 53.4417765 |
| GOTERM_MF_FAT   | GO:0030291~protein serine/threonine kinase inhibitor     | 3  | 0.75  | 0.051268566 | 213348_AT, 219534_X_AT, 20: | 282 | 17   | 12983 | 8.12453066 | 1          | 0.67780143 | 53.4986932 |
| GOTERM_MF_FAT   | GO:0005160~transforming growth factor beta receptor      | 3  | 0.75  | 0.051268566 | 207069_S_AT, 205210_AT, 20: | 282 | 17   | 12983 | 8.12453066 | 1          | 0.67780143 | 53.4986932 |
| GOTERM_BP_FAT   | GO:0045765~regulation of angiogenesis                    | 5  | 1.25  | 0.051469123 | 209710_AT, 200921_S_AT, 20: | 302 | 63   | 13528 | 3.55513508 | 1          | 0.43207544 | 60.284177  |
| INTERPRO        | IPR001487:Bromodomain                                    | 4  | 1     | 0.051662434 | 209762_X_AT, 209049_S_AT, ; | 352 | 40   | 16659 | 4.73267045 | 1          | 0.94133162 | 55.0302457 |
| GOTERM_CC_FAT   | GO:0042579~microbody                                     | 6  | 1.5   | 0.052175678 | 202540_S_AT, 209424_S_AT, ; | 252 | 103  | 12782 | 2.95469256 | 0.99999988 | 0.51490593 | 51.0795552 |
| GOTERM_CC_FAT   | GO:0005777~peroxisome                                    | 6  | 1.5   | 0.052175678 | 202540_S_AT, 209424_S_AT, ; | 252 | 103  | 12782 | 2.95469256 | 0.99999988 | 0.51490593 | 51.0795552 |



|                 |                                                         |     |       |             |                             |     |       |       |            |            |            |            |
|-----------------|---------------------------------------------------------|-----|-------|-------------|-----------------------------|-----|-------|-------|------------|------------|------------|------------|
| GOTERM_BP_FAT   | GO:0001501~skeletal system development                  | 13  | 3.25  | 0.052584925 | 205498_AT, 205453_AT, 2138: | 302 | 319   | 13528 | 1.82548942 | 1          | 0.43768416 | 61.0927606 |
| GOTERM_MF_FAT   | GO:0003712~transcription cofactor activity              | 14  | 3.5   | 0.052649553 | 203588_S_AT, 203920_AT, 20: | 282 | 363   | 12983 | 1.77560909 | 1          | 0.67344869 | 54.473812  |
| GOTERM_BP_FAT   | GO:0042493~response to drug                             | 10  | 2.5   | 0.052679352 | 210754_S_AT, 203980_AT, 20: | 302 | 216   | 13528 | 2.0738288  | 1          | 0.43678621 | 61.1604709 |
| UP_SEQ_FEATURE  | sequence variant                                        | 264 | 66    | 0.052846946 | 219885_AT, 40687_AT, 21362: | 395 | 11992 | 19113 | 1.06523167 | 1          | 0.99118574 | 58.5038103 |
| GOTERM_BP_FAT   | GO:0051101~regulation of DNA binding                    | 7   | 1.75  | 0.05322426  | 209119_X_AT, 209121_X_AT, : | 302 | 121   | 13528 | 2.59142904 | 1          | 0.43872162 | 61.5490441 |
| GOTERM_BP_FAT   | GO:0000165~MAPKKK cascade                               | 9   | 2.25  | 0.053640014 | 205498_AT, 207574_S_AT, 20: | 302 | 184   | 13528 | 2.19104521 | 1          | 0.43983168 | 61.8430495 |
| GOTERM_BP_FAT   | GO:0060393~regulation of pathway-restricted SMAD pr     | 3   | 0.75  | 0.053867746 | 207069_S_AT, 204822_AT, 21: | 302 | 17    | 13528 | 7.90494741 | 1          | 0.43976675 | 62.0031931 |
| GOTERM_BP_FAT   | GO:0006297~nucleotide-excision repair, DNA gap filling  | 3   | 0.75  | 0.053867746 | 203209_AT, 201202_AT, 2059: | 302 | 17    | 13528 | 7.90494741 | 1          | 0.43976675 | 62.0031931 |
| GOTERM_BP_FAT   | GO:0032103~positive regulation of response to externa   | 5   | 1.25  | 0.05398006  | 210029_AT, 204200_S_AT, 20: | 302 | 64    | 13528 | 3.49958609 | 1          | 0.4389902  | 62.0819396 |
| GOTERM_MF_FAT   | GO:0001883~purine nucleoside binding                    | 45  | 11.25 | 0.055728145 | 219885_AT, 203504_S_AT, 20: | 282 | 1601  | 12983 | 1.2940383  | 1          | 0.68100375 | 56.5794812 |
| GOTERM_MF_FAT   | GO:0005524~ATP binding                                  | 42  | 10.5  | 0.056181038 | 219885_AT, 203504_S_AT, 20: | 282 | 1477  | 12983 | 1.30916608 | 1          | 0.6707663  | 56.8814808 |
| GOTERM_MF_FAT   | GO:0060090~molecular adaptor activity                   | 5   | 1.25  | 0.057036694 | 206204_AT, 207112_S_AT, 20: | 282 | 67    | 12983 | 3.4357468  | 1          | 0.66361669 | 57.4467203 |
| UP_SEQ_FEATURE  | DNA-binding region:Homeobox; TALE-type                  | 3   | 0.75  | 0.057544211 | 207480_S_AT, 204069_AT, 21: | 395 | 199   | 19113 | 7.6401066  | 1          | 0.99193582 | 61.7149085 |
| GOTERM_BP_FAT   | GO:0046394~carboxylic acid biosynthetic process         | 8   | 2     | 0.058201295 | 209424_S_AT, 204154_AT, 21: | 302 | 155   | 13528 | 2.31198462 | 1          | 0.46301543 | 64.9324671 |
| GOTERM_BP_FAT   | GO:0016053~organic acid biosynthetic process            | 8   | 2     | 0.058201295 | 209424_S_AT, 204154_AT, 21: | 302 | 155   | 13528 | 2.31198462 | 1          | 0.46301543 | 64.9324671 |
| GOTERM_BP_FAT   | GO:0010551~regulation of specific transcription from RI | 6   | 1.5   | 0.058520149 | 219743_AT, 209199_S_AT, 20: | 302 | 94    | 13528 | 2.8592363  | 1          | 0.46339506 | 65.1393656 |
| SP_PIR_KEYWORDS | ubl conjugation pathway                                 | 17  | 4.25  | 0.059042986 | 201294_S_AT, 202870_S_AT, ; | 395 | 509   | 19235 | 1.62639576 | 1          | 0.41977505 | 56.0455388 |
| OMIM_DISEASE    | Common variants at 30 loci contribute to polygenic dysl | 4   | 1     | 0.059062618 | 202540_S_AT, 203504_S_AT, ; | 74  | 45    | 3671  | 4.40960961 | 0.99996988 | 52.4527    |            |
| INTERPRO        | IPR017441:Protein kinase, ATP binding site              | 16  | 4     | 0.059138294 | 205805_S_AT, 59644_AT, 210: | 352 | 455   | 16659 | 1.66423576 | 1          | 0.95149967 | 60.085037  |
| GOTERM_BP_FAT   | GO:0045646~regulation of erythrocyte differentiation    | 3   | 0.75  | 0.059732988 | 203332_S_AT, 204249_S_AT, ; | 302 | 18    | 13528 | 7.46578366 | 1          | 0.46898314 | 65.9158877 |
| GOTERM_BP_FAT   | GO:0035116~embryonic hindlimb morphogenesis             | 3   | 0.75  | 0.059732988 | 221884_AT, 205080_AT, 2058: | 302 | 18    | 13528 | 7.46578366 | 1          | 0.46898314 | 65.9158877 |
| INTERPRO        | IPR004182:GRAM                                          | 3   | 0.75  | 0.059801442 | 204526_S_AT, 218706_S_AT, ; | 352 | 19    | 16659 | 7.47263756 | 1          | 0.94256536 | 60.5068025 |
| GOTERM_MF_FAT   | GO:0042803~protein homodimerization activity            | 13  | 3.25  | 0.059970089 | 202540_S_AT, 205875_S_AT, ; | 282 | 334   | 12983 | 1.7919374  | 1          | 0.67013164 | 59.3325514 |
| GOTERM_MF_FAT   | GO:0001882~nucleoside binding                           | 45  | 11.25 | 0.060996241 | 219885_AT, 203504_S_AT, 20: | 282 | 1612  | 12983 | 1.28520801 | 1          | 0.66453599 | 59.9736603 |
| KEGG_PATHWAY    | hsa00120:Primary bile acid biosynthesis                 | 3   | 0.75  | 0.061608763 | 209424_S_AT, 206932_AT, 20: | 131 | 16    | 5085  | 7.27814885 | 0.99957259 | 0.7255435  | 51.9118687 |
| INTERPRO        | IPR013629:Zinc finger-associated region                 | 2   | 0.5   | 0.06189027  | 209121_X_AT, 209119_X_AT, ; | 352 | 3     | 16659 | 31.5511364 | 1          | 0.9376599  | 61.8082728 |
| INTERPRO        | IPR003068:Transcription factor COUP                     | 2   | 0.5   | 0.06189027  | 209121_X_AT, 209119_X_AT, ; | 352 | 3     | 16659 | 31.5511364 | 1          | 0.9376599  | 61.8082728 |
| GOTERM_BP_FAT   | GO:0050818~regulation of coagulation                    | 4   | 1     | 0.062551539 | 204200_S_AT, 216061_X_AT, ; | 302 | 41    | 13528 | 4.37021483 | 1          | 0.48359465 | 67.6579551 |
| GOTERM_CC_FAT   | GO:0019898~extrinsic to membrane                        | 16  | 4     | 0.062654842 | 205498_AT, 206204_AT, 2189: | 252 | 494   | 12782 | 1.64282501 | 1          | 0.5663518  | 57.823698  |
| GOTERM_MF_FAT   | GO:0032139~dinucleotide insertion or deletion binding   | 2   | 0.5   | 0.063540643 | 201202_AT, 209421_AT        | 282 | 3     | 12983 | 30.6926714 | 1          | 0.66836703 | 61.5229506 |
| GOTERM_BP_FAT   | GO:0032869~cellular response to insulin stimulus        | 5   | 1.25  | 0.064674342 | 205498_AT, 211580_S_AT, 20: | 302 | 68    | 13528 | 3.29372809 | 1          | 0.49390482 | 68.9142065 |
| GOTERM_BP_FAT   | GO:0021915~neural tube development                      | 5   | 1.25  | 0.064674342 | 213373_S_AT, 203394_S_AT, ; | 302 | 68    | 13528 | 3.29372809 | 1          | 0.49390482 | 68.9142065 |
| GOTERM_BP_FAT   | GO:0009063~cellular amino acid catabolic process        | 5   | 1.25  | 0.064674342 | 204154_AT, 210029_AT, 2042: | 302 | 68    | 13528 | 3.29372809 | 1          | 0.49390482 | 68.9142065 |
| GOTERM_BP_FAT   | GO:0043123~positive regulation of I-kappaB kinase/NF-   | 6   | 1.5   | 0.065201908 | 206638_AT, 213373_S_AT, 20: | 302 | 97    | 13528 | 2.77080631 | 1          | 0.49528026 | 69.2191983 |
| GOTERM_BP_FAT   | GO:0035283~central nervous system segmentation          | 2   | 0.5   | 0.065280969 | 214457_AT, 218559_S_AT      | 302 | 3     | 13528 | 29.8631347 | 1          | 0.4941965  | 69.2646608 |
| GOTERM_BP_FAT   | GO:0035284~brain segmentation                           | 2   | 0.5   | 0.065280969 | 214457_AT, 218559_S_AT      | 302 | 3     | 13528 | 29.8631347 | 1          | 0.4941965  | 69.2646608 |
| GOTERM_BP_FAT   | GO:0021570~rhombomere 4 development                     | 2   | 0.5   | 0.065280969 | 205453_AT, 214639_S_AT      | 302 | 3     | 13528 | 29.8631347 | 1          | 0.4941965  | 69.2646608 |
| GOTERM_BP_FAT   | GO:0060433~bronchus development                         | 2   | 0.5   | 0.065280969 | 213844_AT, 211518_S_AT      | 302 | 3     | 13528 | 29.8631347 | 1          | 0.4941965  | 69.2646608 |
| INTERPRO        | IPR012287:Homeodomain-related                           | 10  | 2.5   | 0.065349367 | 205453_AT, 213844_AT, 2113: | 352 | 238   | 16659 | 1.988517   | 1          | 0.93689344 | 63.8758077 |
| GOTERM_BP_FAT   | GO:0051960~regulation of nervous system developmen      | 9   | 2.25  | 0.065381963 | 210754_S_AT, 203394_S_AT, ; | 302 | 192   | 13528 | 2.09975166 | 1          | 0.4932395  | 69.3226431 |
| GOTERM_BP_FAT   | GO:0040012~regulation of locomotion                     | 9   | 2.25  | 0.065381963 | 207112_S_AT, 215775_AT, 20: | 302 | 192   | 13528 | 2.09975166 | 1          | 0.4932395  | 69.3226431 |
| GOTERM_BP_FAT   | GO:0030182~neuron differentiation                       | 16  | 4     | 0.065481774 | 209238_AT, 210056_AT, 2195: | 302 | 438   | 13528 | 1.63633615 | 1          | 0.49228266 | 69.3798448 |
| GOTERM_BP_FAT   | GO:0007098~centrosome cycle                             | 3   | 0.75  | 0.065805801 | 203725_AT, 204444_AT, 2096: | 302 | 19    | 13528 | 7.07284768 | 1          | 0.4925474  | 69.5648522 |
| GOTERM_BP_FAT   | GO:0008206~bile acid metabolic process                  | 3   | 0.75  | 0.065805801 | 209424_S_AT, 209426_S_AT, ; | 302 | 19    | 13528 | 7.07284768 | 1          | 0.4925474  | 69.5648522 |
| GOTERM_BP_FAT   | GO:0021545~cranial nerve development                    | 3   | 0.75  | 0.065805801 | 205453_AT, 203394_S_AT, 21: | 302 | 19    | 13528 | 7.07284768 | 1          | 0.4925474  | 69.5648522 |
| GOTERM_BP_FAT   | GO:0048483~autonomic nervous system development         | 3   | 0.75  | 0.065805801 | 205453_AT, 203394_S_AT, 21: | 302 | 19    | 13528 | 7.07284768 | 1          | 0.4925474  | 69.5648522 |
| GOTERM_BP_FAT   | GO:0006793~phosphorus metabolic process                 | 30  | 7.5   | 0.066028658 | 210754_S_AT, 207574_S_AT, ; | 302 | 973   | 13528 | 1.38113161 | 1          | 0.49226487 | 69.6914835 |
| GOTERM_BP_FAT   | GO:0006796~phosphate metabolic process                  | 30  | 7.5   | 0.066028658 | 210754_S_AT, 207574_S_AT, ; | 302 | 973   | 13528 | 1.38113161 | 1          | 0.49226487 | 69.6914835 |
| GOTERM_BP_FAT   | GO:0031399~regulation of protein modification process   | 12  | 3     | 0.066125656 | 202730_S_AT, 207069_S_AT, ; | 302 | 295   | 13528 | 1.82215737 | 1          | 0.49130797 | 69.746444  |
| GOTERM_MF_FAT   | GO:0032559~adenyl ribonucleotide binding                | 42  | 10.5  | 0.066480824 | 219885_AT, 203504_S_AT, 20: | 282 | 1497  | 12983 | 1.29167555 | 1          | 0.67422456 | 63.2436157 |
| GOTERM_BP_FAT   | GO:0051270~regulation of cell motion                    | 9   | 2.25  | 0.067024382 | 210754_S_AT, 207112_S_AT, ; | 302 | 193   | 13528 | 2.08887211 | 1          | 0.49464589 | 70.2512268 |
| GOTERM_BP_FAT   | GO:0070302~regulation of stress-activated protein kina  | 5   | 1.25  | 0.067508719 | 202730_S_AT, 210754_S_AT, ; | 302 | 69    | 13528 | 3.2459929  | 1          | 0.49574756 | 70.519959  |
| GOTERM_BP_FAT   | GO:0035270~endocrine system development                 | 5   | 1.25  | 0.067508719 | 209710_AT, 213844_AT, 2033: | 302 | 69    | 13528 | 3.2459929  | 1          | 0.49574756 | 70.519959  |

|                 |                                                        |     |       |             |                             |     |       |       |            |            |            |            |
|-----------------|--------------------------------------------------------|-----|-------|-------------|-----------------------------|-----|-------|-------|------------|------------|------------|------------|
| GOTERM_BP_FAT   | GO:0051272~positive regulation of cell motion          | 6   | 1.5   | 0.067520325 | 210754_S_AT, 204200_S_AT, ; | 302 | 98    | 13528 | 2.74253277 | 1          | 0.4943439  | 70.5263701 |
| GOTERM_BP_FAT   | GO:0003006~reproductive developmental process          | 11  | 2.75  | 0.068534928 | 202540_S_AT, 211538_S_AT, ; | 302 | 262   | 13528 | 1.88069359 | 1          | 0.49822102 | 71.0818024 |
| PIR_SUPERFAMILY | PIRSF500849:orphan nuclear receptor COUP-TF            | 2   | 0.5   | 0.068553496 | 209121_X_AT, 209119_X_AT, ; | 174 | 3     | 7396  | 28.3371648 | 0.99999984 | 0.97987734 | 59.5052273 |
| PIR_SUPERFAMILY | PIRSF010369:growth arrest and DNA-damage-inducible     | 2   | 0.5   | 0.068553496 | 203725_AT, 207574_S_AT, 20: | 174 | 3     | 7396  | 28.3371648 | 0.99999984 | 0.97987734 | 59.5052273 |
| UP_SEQ_FEATURE  | short sequence motif:PDZ-binding                       | 5   | 1.25  | 0.069185686 | 206638_AT, 202669_S_AT, 20: | 395 | 75    | 19113 | 3.22582278 | 1          | 0.99577518 | 68.6971754 |
| UP_SEQ_FEATURE  | repeat:LRR 6                                           | 9   | 2.25  | 0.069984667 | 222108_AT, 210567_S_AT, 20: | 395 | 210   | 19113 | 2.07374322 | 1          | 0.99452099 | 69.1296288 |
| SP_PIR_KEYWORDS | lipoprotein                                            | 20  | 5     | 0.070080832 | 209119_X_AT, 209121_X_AT, ; | 395 | 642   | 19235 | 1.51701566 | 1          | 0.46864111 | 62.5213097 |
| GOTERM_BP_FAT   | GO:0030218~erythrocyte differentiation                 | 4   | 1     | 0.070145718 | 210754_S_AT, 201565_S_AT, ; | 302 | 43    | 13528 | 4.16694902 | 1          | 0.50511946 | 71.9433854 |
| GOTERM_BP_FAT   | GO:0048610~reproductive cellular process               | 8   | 2     | 0.070224523 | 202540_S_AT, 211538_S_AT, ; | 302 | 162   | 13528 | 2.21208405 | 1          | 0.50406577 | 71.9849094 |
| GOTERM_BP_FAT   | GO:0045597~positive regulation of cell differentiation | 10  | 2.5   | 0.070589705 | 210754_S_AT, 203332_S_AT, ; | 302 | 229   | 13528 | 1.95610052 | 1          | 0.50448508 | 72.1765765 |
| KEGG_PATHWAY    | hsa04210:Apoptosis                                     | 6   | 1.5   | 0.070904886 | 213373_S_AT, 202687_S_AT, ; | 131 | 87    | 5085  | 2.67702027 | 0.99987314 | 0.7224543  | 57.1199307 |
| GOTERM_BP_FAT   | GO:0033261~regulation of S phase                       | 3   | 0.75  | 0.072074113 | 207069_S_AT, 219258_AT, 20: | 302 | 20    | 13528 | 6.7192053  | 1          | 0.51056923 | 72.9430211 |
| GOTERM_BP_FAT   | GO:0032868~response to insulin stimulus                | 6   | 1.5   | 0.072293157 | 205498_AT, 211580_S_AT, 21: | 302 | 100   | 13528 | 2.68768212 | 1          | 0.51022319 | 73.0544206 |
| GOTERM_BP_FAT   | GO:0051321~meiotic cell cycle                          | 6   | 1.5   | 0.072293157 | 211538_S_AT, 214250_AT, 20: | 302 | 100   | 13528 | 2.68768212 | 1          | 0.51022319 | 73.0544206 |
| SP_PIR_KEYWORDS | polymorphism                                           | 252 | 63    | 0.073495073 | 219885_AT, 213625_AT, 2025: | 395 | 11550 | 19235 | 1.0624626  | 1          | 0.47630532 | 64.3378781 |
| GOTERM_BP_FAT   | GO:0006720~isoprenoid metabolic process                | 4   | 1     | 0.074091518 | 202540_S_AT, 204488_AT, 20: | 302 | 44    | 13528 | 4.07224564 | 1          | 0.51772932 | 73.9528035 |
| GOTERM_BP_FAT   | GO:0007281~germ cell development                       | 6   | 1.5   | 0.07474725  | 211538_S_AT, 211919_S_AT, ; | 302 | 101   | 13528 | 2.66107141 | 1          | 0.51950808 | 74.2732948 |
| GOTERM_BP_FAT   | GO:0051276~chromosome organization                     | 17  | 4.25  | 0.075726659 | 202326_AT, 203362_S_AT, 20: | 302 | 485   | 13528 | 1.57012357 | 1          | 0.52284047 | 74.745069  |
| GOTERM_CC_FAT   | GO:0005816~spindle pole body                           | 2   | 0.5   | 0.076273117 | 203362_S_AT, 215509_S_AT, ; | 252 | 4     | 12782 | 25.3611111 | 1          | 0.62537062 | 65.3052406 |
| GOTERM_BP_FAT   | GO:0032870~cellular response to hormone stimulus       | 7   | 1.75  | 0.076623746 | 205498_AT, 211580_S_AT, 20: | 302 | 133   | 13528 | 2.35761589 | 1          | 0.52573239 | 75.1700214 |
| GOTERM_MF_FAT   | GO:0046332~SMAD binding                                | 4   | 1     | 0.077135049 | 207069_S_AT, 202704_AT, 20: | 282 | 46    | 12983 | 4.00339192 | 1          | 0.71922235 | 68.8967112 |
| UP_SEQ_FEATURE  | repeat:LRR 4                                           | 10  | 2.5   | 0.078039371 | 222108_AT, 204359_AT, 2183: | 395 | 252   | 19113 | 1.92013261 | 1          | 0.99594227 | 73.1871595 |
| SP_PIR_KEYWORDS | tyrosine-protein kinase                                | 6   | 1.5   | 0.078075231 | 205805_S_AT, 210754_S_AT, ; | 395 | 111   | 19235 | 2.63222716 | 1          | 0.48889347 | 66.6468846 |
| KEGG_PATHWAY    | hsa04010:MAPK signaling pathway                        | 12  | 3     | 0.078344572 | 211538_S_AT, 209199_S_AT, ; | 131 | 267   | 5085  | 1.74457501 | 0.99995243 | 0.7118153  | 60.9110088 |
| GOTERM_BP_FAT   | GO:000086~G2/M transition of mitotic cell cycle        | 3   | 0.75  | 0.078526284 | 203725_AT, 208159_X_AT, 20: | 302 | 21    | 13528 | 6.39924314 | 1          | 0.53335473 | 76.0490529 |
| GOTERM_BP_FAT   | GO:0003007~heart morphogenesis                         | 5   | 1.25  | 0.07947543  | 219658_AT, 213260_AT, 2182: | 302 | 73    | 13528 | 3.06813027 | 1          | 0.53637466 | 76.476538  |
| GOTERM_BP_FAT   | GO:0007178~transmembrane receptor protein serine/t     | 6   | 1.5   | 0.079789826 | 207069_S_AT, 204200_S_AT, ; | 302 | 103   | 13528 | 2.60940012 | 1          | 0.53640758 | 76.6165452 |
| GOTERM_BP_FAT   | GO:0051090~regulation of transcription factor activity | 6   | 1.5   | 0.079789826 | 209121_X_AT, 209119_X_AT, ; | 302 | 103   | 13528 | 2.60940012 | 1          | 0.53640758 | 76.6165452 |
| GOTERM_MF_FAT   | GO:0000166~nucleotide binding                          | 59  | 14.75 | 0.079883242 | 202540_S_AT, 219885_AT, 20: | 282 | 2245  | 12983 | 1.20993382 | 1          | 0.72189145 | 70.2173942 |
| UP_SEQ_FEATURE  | repeat:TNFR-Cys 3                                      | 3   | 0.75  | 0.080719951 | 204781_S_AT, 215719_X_AT, ; | 395 | 23    | 19113 | 6.31139241 | 1          | 0.99550255 | 74.4225437 |
| GOTERM_BP_FAT   | GO:0018108~peptidyl-tyrosine phosphorylation           | 4   | 1     | 0.082270714 | 205498_AT, 210754_S_AT, 20: | 302 | 46    | 13528 | 3.89519148 | 1          | 0.54639696 | 77.6941008 |
| GOTERM_BP_FAT   | GO:0001816~cytokine production                         | 4   | 1     | 0.082270714 | 203504_S_AT, 210029_AT, 21: | 302 | 46    | 13528 | 3.89519148 | 1          | 0.54639696 | 77.6941008 |
| INTERPRO        | IPR001611:Leucine-rich repeat                          | 9   | 2.25  | 0.08266296  | 222108_AT, 204359_AT, 2183: | 352 | 213   | 16659 | 1.99971991 | 1          | 0.96425623 | 72.7444225 |
| GOTERM_CC_FAT   | GO:0044430~cytoskeletal part                           | 26  | 6.5   | 0.083369538 | 204315_S_AT, 210754_S_AT, ; | 252 | 952   | 12782 | 1.38527077 | 1          | 0.64447666 | 68.6977358 |
| GOTERM_BP_FAT   | GO:0030334~regulation of cell migration                | 8   | 2     | 0.083625279 | 207112_S_AT, 215775_AT, 20: | 302 | 169   | 13528 | 2.12045927 | 1          | 0.55108877 | 78.2625106 |
| GOTERM_BP_FAT   | GO:0043627~response to estrogen stimulus               | 6   | 1.5   | 0.085010078 | 205498_AT, 204200_S_AT, 21: | 302 | 105   | 13528 | 2.55969726 | 1          | 0.55583835 | 78.8294729 |
| GOTERM_BP_FAT   | GO:0055010~ventricular cardiac muscle morphogenesis    | 3   | 0.75  | 0.085151092 | 219658_AT, 213260_AT, 2047: | 302 | 22    | 13528 | 6.10836845 | 1          | 0.55503574 | 78.8864179 |
| GOTERM_BP_FAT   | GO:0008633~activation of pro-apoptotic gene products   | 3   | 0.75  | 0.085151092 | 213373_S_AT, 202687_S_AT, ; | 302 | 22    | 13528 | 6.10836845 | 1          | 0.55503574 | 78.8864179 |
| GOTERM_BP_FAT   | GO:0030855~epithelial cell differentiation             | 7   | 1.75  | 0.085535661 | 209119_X_AT, 209121_X_AT, ; | 302 | 137   | 13528 | 2.28878039 | 1          | 0.55531264 | 79.0409832 |
| SMART           | SM00297:BROMO                                          | 4   | 1     | 0.085736354 | 209762_X_AT, 209049_S_AT, ; | 238 | 40    | 9079  | 3.81470588 | 0.99999995 | 0.96562153 | 67.1134902 |
| GOTERM_BP_FAT   | GO:0021610~facial nerve morphogenesis                  | 2   | 0.5   | 0.086083219 | 205453_AT, 214639_S_AT      | 302 | 4     | 13528 | 22.397351  | 1          | 0.55630277 | 79.2592174 |
| GOTERM_BP_FAT   | GO:0021604~cranial nerve structural organization       | 2   | 0.5   | 0.086083219 | 205453_AT, 214639_S_AT      | 302 | 4     | 13528 | 22.397351  | 1          | 0.55630277 | 79.2592174 |
| GOTERM_BP_FAT   | GO:0021571~rhombomere 5 development                    | 2   | 0.5   | 0.086083219 | 214639_S_AT, 218559_S_AT    | 302 | 4     | 13528 | 22.397351  | 1          | 0.55630277 | 79.2592174 |
| GOTERM_BP_FAT   | GO:0021612~facial nerve structural organization        | 2   | 0.5   | 0.086083219 | 205453_AT, 214639_S_AT      | 302 | 4     | 13528 | 22.397351  | 1          | 0.55630277 | 79.2592174 |
| GOTERM_BP_FAT   | GO:0010544~negative regulation of platelet activation  | 2   | 0.5   | 0.086083219 | 204200_S_AT, 216061_X_AT, ; | 302 | 4     | 13528 | 22.397351  | 1          | 0.55630277 | 79.2592174 |
| GOTERM_BP_FAT   | GO:0060438~trachea development                         | 2   | 0.5   | 0.086083219 | 213844_AT, 211518_S_AT      | 302 | 4     | 13528 | 22.397351  | 1          | 0.55630277 | 79.2592174 |
| GOTERM_BP_FAT   | GO:0060441~branching involved in lung morphogenesis    | 2   | 0.5   | 0.086083219 | 213844_AT, 211518_S_AT      | 302 | 4     | 13528 | 22.397351  | 1          | 0.55630277 | 79.2592174 |
| SMART           | SM00568:GRAM                                           | 3   | 0.75  | 0.086760388 | 204526_S_AT, 218706_S_AT, ; | 238 | 19    | 9079  | 6.02321981 | 0.99999996 | 0.94179121 | 67.5675902 |
| COG_ONTOLOGY    | Cell division and chromosome partitioning              | 6   | 1.5   | 0.08685498  | 212096_S_AT, 211580_S_AT, ; | 45  | 106   | 1950  | 2.45283019 | 0.74408466 | 0.74408466 | 46.8321702 |
| UP_SEQ_FEATURE  | domain:Helix-loop-helix motif                          | 6   | 1.5   | 0.087014817 | 219743_AT, 209757_S_AT, 20: | 395 | 114   | 19113 | 2.5467022  | 1          | 0.99612486 | 77.1168904 |
| UP_SEQ_FEATURE  | active site:Proton acceptor                            | 20  | 5     | 0.087706678 | 210754_S_AT, 205698_S_AT, ; | 395 | 658   | 19113 | 1.47073987 | 1          | 0.99516937 | 77.3961988 |
| GOTERM_MF_FAT   | GO:0019955~cytokine binding                            | 6   | 1.5   | 0.087770583 | 211919_S_AT, 205498_AT, 20: | 282 | 109   | 12983 | 2.53425727 | 1          | 0.74661696 | 73.7235237 |
| UP_SEQ_FEATURE  | repeat:LRR 15                                          | 4   | 1     | 0.087806231 | 218326_S_AT, 218816_AT, 20: | 395 | 51    | 19113 | 3.79508563 | 1          | 0.99388145 | 77.4361246 |

|                 |                                                         |    |      |             |                             |     |     |       |            |            |            |            |
|-----------------|---------------------------------------------------------|----|------|-------------|-----------------------------|-----|-----|-------|------------|------------|------------|------------|
| SMART           | SM00389:HOX                                             | 11 | 2.75 | 0.088100713 | 205453_AT, 213844_AT, 2113: | 238 | 235 | 9079  | 1.78560701 | 0.99999997 | 0.91599841 | 68.1532364 |
| GOTERM_BP_FAT   | GO:0050727~regulation of inflammatory response          | 5  | 1.25 | 0.089094902 | 210029_AT, 201042_AT, 2039: | 302 | 76  | 13528 | 2.94701987 | 1          | 0.56790941 | 80.4217572 |
| GOTERM_MF_FAT   | GO:0005070~SH3/SH2 adaptor activity                     | 4  | 1    | 0.08939473  | 206204_AT, 207112_S_AT, 20: | 282 | 49  | 12983 | 3.75828629 | 1          | 0.74376495 | 74.3960067 |
| PIR_SUPERFAMILY | PIRSF037625:HERC protein                                | 2  | 0.5  | 0.090349823 | 219863_AT, 219352_AT        | 174 | 4   | 7396  | 21.2528736 | 1          | 0.98449492 | 70.043151  |
| GOTERM_BP_FAT   | GO:0043122~regulation of I-kappaB kinase/NF-kappaB c    | 6  | 1.5  | 0.090405922 | 206638_AT, 213373_S_AT, 20: | 302 | 107 | 13528 | 2.51185245 | 1          | 0.57205298 | 80.9083855 |
| GOTERM_BP_FAT   | GO:0032582~negative regulation of gene-specific trans   | 4  | 1    | 0.090819638 | 219743_AT, 213348_AT, 2091: | 302 | 48  | 13528 | 3.73289183 | 1          | 0.57238213 | 81.0595676 |
| GOTERM_BP_FAT   | GO:0018212~peptidyl-tyrosine modification               | 4  | 1    | 0.090819638 | 205498_AT, 210754_S_AT, 20: | 302 | 48  | 13528 | 3.73289183 | 1          | 0.57238213 | 81.0595676 |
| GOTERM_BP_FAT   | GO:0006909~phagocytosis                                 | 4  | 1    | 0.090819638 | 203504_S_AT, 209710_AT, 20: | 302 | 48  | 13528 | 3.73289183 | 1          | 0.57238213 | 81.0595676 |
| UP_SEQ_FEATURE  | zinc finger region:PHD-type                             | 4  | 1    | 0.091826761 | 209762_X_AT, 209049_S_AT, ; | 395 | 52  | 19113 | 3.72210321 | 1          | 0.99395881 | 78.9943693 |
| GOTERM_BP_FAT   | GO:0030195~negative regulation of blood coagulation     | 3  | 0.75 | 0.091937722 | 204200_S_AT, 216061_X_AT, ; | 302 | 23  | 13528 | 5.84278722 | 1          | 0.57564388 | 81.4625157 |
| GOTERM_BP_FAT   | GO:0001974~blood vessel remodeling                      | 3  | 0.75 | 0.091937722 | 201042_AT, 205581_S_AT, 21: | 302 | 23  | 13528 | 5.84278722 | 1          | 0.57564388 | 81.4625157 |
| GOTERM_BP_FAT   | GO:0045321~leukocyte activation                         | 10 | 2.5  | 0.092170511 | 215719_X_AT, 210754_S_AT, ; | 302 | 242 | 13528 | 1.85102074 | 1          | 0.57520793 | 81.5453883 |
| UP_SEQ_FEATURE  | compositionally biased region:Poly-Gln                  | 7  | 1.75 | 0.092759989 | 201368_AT, 209119_X_AT, 20: | 395 | 151 | 19113 | 2.2431218  | 1          | 0.99290621 | 79.3413294 |
| UP_SEQ_FEATURE  | repeat:TNFR-Cys 1                                       | 3  | 0.75 | 0.093212371 | 204781_S_AT, 215719_X_AT, ; | 395 | 25  | 19113 | 5.80648101 | 1          | 0.99156136 | 79.5075766 |
| UP_SEQ_FEATURE  | repeat:TNFR-Cys 2                                       | 3  | 0.75 | 0.093212371 | 204781_S_AT, 215719_X_AT, ; | 395 | 25  | 19113 | 5.80648101 | 1          | 0.99156136 | 79.5075766 |
| INTERPRO        | IPR001092:Basic helix-loop-helix dimerisation region bH | 6  | 1.5  | 0.093273134 | 219743_AT, 209757_S_AT, 20: | 352 | 114 | 16659 | 2.49087919 | 1          | 0.97216863 | 77.1264006 |
| GOTERM_CC_FAT   | GO:0001950~plasma membrane enriched fraction            | 2  | 0.5  | 0.094418011 | 209238_AT, 216985_S_AT, 21: | 252 | 5   | 12782 | 20.2888889 | 1          | 0.67790597 | 73.3739257 |
| GOTERM_CC_FAT   | GO:0031264~death-inducing signaling complex             | 2  | 0.5  | 0.094418011 | 213373_S_AT, 204781_S_AT, ; | 252 | 5   | 12782 | 20.2888889 | 1          | 0.67790597 | 73.3739257 |
| SP_PIR_KEYWORDS | Acyltransferase                                         | 7  | 1.75 | 0.095076668 | 214440_AT, 204573_AT, 2018: | 395 | 153 | 19235 | 2.22793083 | 1          | 0.55257023 | 74.0612736 |
| GOTERM_MF_FAT   | GO:0003714~transcription corepressor activity           | 7  | 1.75 | 0.095098044 | 209121_X_AT, 209119_X_AT, ; | 282 | 145 | 12983 | 2.22257276 | 1          | 0.75702086 | 76.632636  |
| GOTERM_BP_FAT   | GO:0034101~erythrocyte homeostasis                      | 4  | 1    | 0.095227427 | 210754_S_AT, 201565_S_AT, ; | 302 | 49  | 13528 | 3.65671037 | 1          | 0.58630423 | 82.6017402 |
| GOTERM_BP_FAT   | GO:0009310~amine catabolic process                      | 5  | 1.25 | 0.09580481  | 204154_AT, 210029_AT, 2042: | 302 | 78  | 13528 | 2.87145526 | 1          | 0.58722986 | 82.7947492 |
| GOTERM_BP_FAT   | GO:0007517~muscle organ development                     | 9  | 2.25 | 0.098503735 | 209199_S_AT, 209119_X_AT, ; | 302 | 211 | 13528 | 1.91067449 | 1          | 0.5965349  | 83.6704852 |
| UP_SEQ_FEATURE  | region of interest:Fatty acid binding                   | 2  | 0.5  | 0.098918364 | 203980_AT, 202345_S_AT      | 395 | 5   | 19113 | 19.3549367 | 1          | 0.9924596  | 81.4995601 |
| UP_SEQ_FEATURE  | DNA-binding region:Homeobox                             | 8  | 2    | 0.099013119 | 205453_AT, 213844_AT, 2062: | 395 | 190 | 19113 | 2.03736176 | 1          | 0.99100615 | 81.5310513 |
| GOTERM_CC_FAT   | GO:0000228~nuclear chromosome                           | 7  | 1.75 | 0.099918109 | 205053_AT, 219258_AT, 2155: | 252 | 162 | 12782 | 2.19170096 | 1          | 0.68587517 | 75.4525671 |

**Supplementary Table 9. Genes inhibited by Ox-PAPC by 1.5 fold and the inhibition was reversed by ADAM10 silencing by 1.2 fold.**

Values are represented as log2 scale.

| ProbeSetID  | Gene.Symbol    | log2(sc+C)  | log2(sc+Ox40) | log2(ADAM10si+C) | log2(ADAM10si+Ox50) | cutoff by -log2(1.5)   |                                    | cutoff by log2(1.2)                                  |  |
|-------------|----------------|-------------|---------------|------------------|---------------------|------------------------|------------------------------------|------------------------------------------------------|--|
|             |                |             |               |                  |                     | log2[(sc+Ox40)/(sc+C)] | log2[(ADAM10si+Ox40)/(ADAM10si+C)] | The effects ADAM10si on Fold induction by Ox40 (H-G) |  |
| 219825_at   | CYP26B1        | 8.388583579 | 3.874179133   | 6.405008194      | 3.705304775         | -4.514404446           | -2.69970342                        | <b>1.814701026</b>                                   |  |
| 206932_at   | CH25H          | 4.902128632 | 3.492004581   | 3.305145563      | 3.032174062         | -1.410124051           | -0.272971501                       | <b>1.137152551</b>                                   |  |
| 202688_at   | TNFSF10        | 10.00585203 | 7.918398744   | 9.931076725      | 8.87316092          | -2.087453291           | -1.057915805                       | <b>1.029537486</b>                                   |  |
| 214329_x_at | TNFSF10        | 6.577768737 | 4.658339698   | 6.488819738      | 5.559067062         | -1.919429039           | -0.929752676                       | <b>0.989676363</b>                                   |  |
| 202687_s_at | TNFSF10        | 8.100263694 | 5.92531378    | 7.891517735      | 6.691890896         | -2.174949913           | -1.199626839                       | <b>0.975323074</b>                                   |  |
| 208337_s_at | NR5A2          | 5.092764069 | 3.927312061   | 3.917792351      | 3.653257786         | -1.165452009           | -0.264534565                       | <b>0.900917444</b>                                   |  |
| 218736_s_at | PALMD          | 9.872387001 | 7.961946976   | 9.964117478      | 8.896719754         | -1.910440025           | -1.067397724                       | <b>0.843042301</b>                                   |  |
| 220351_at   | CCRL1          | 5.58923612  | 3.833576082   | 4.937351575      | 3.998474307         | -1.755660038           | -0.938877268                       | <b>0.81678277</b>                                    |  |
| 209305_s_at | GADD45B        | 7.266582753 | 6.574602086   | 6.578300271      | 6.570348807         | -0.691980667           | -0.007951464                       | <b>0.684029203</b>                                   |  |
| 210174_at   | NR5A2          | 6.859203146 | 5.679771264   | 5.88677227       | 5.37979164          | -1.179431882           | -0.50698063                        | <b>0.672451252</b>                                   |  |
| 222126_at   | AGFG2          | 5.931399855 | 5.056773844   | 5.536739262      | 5.333108622         | -0.874626011           | -0.20363064                        | <b>0.670995371</b>                                   |  |
| 205528_s_at | RUNX1T1        | 6.575935984 | 5.1158491     | 6.521932545      | 5.72974096          | -1.460086884           | -0.792191586                       | <b>0.667895299</b>                                   |  |
| 204510_at   | CDC7           | 4.600088597 | 3.829621409   | 3.843249988      | 3.728640365         | -0.770467188           | -0.114609623                       | <b>0.655857565</b>                                   |  |
| 204200_s_at | PDGFB          | 6.153945261 | 5.292404042   | 5.818717339      | 5.566242715         | -0.861541219           | -0.252474624                       | <b>0.609066595</b>                                   |  |
| 204573_at   | CROT           | 5.768667893 | 4.7894214     | 5.675794288      | 5.302245721         | -0.979246493           | -0.373548566                       | <b>0.605697927</b>                                   |  |
| 218559_s_at | MAFB           | 6.178769687 | 4.552070662   | 4.996160792      | 3.970683428         | -1.626699024           | -1.025477364                       | <b>0.60122166</b>                                    |  |
| 203504_s_at | ABCA1          | 5.82027563  | 4.537585177   | 5.223060063      | 4.527634938         | -1.282690454           | -0.695425125                       | <b>0.587265328</b>                                   |  |
| 212182_at   | NUDT4 /// NUD1 | 4.223351991 | 3.270118343   | 3.662695527      | 3.274764805         | -0.953233648           | -0.387930722                       | <b>0.565302926</b>                                   |  |
| 209732_at   | CLEC2B         | 10.19845468 | 9.590932407   | 10.13457006      | 10.08964635         | -0.607522268           | -0.044923713                       | <b>0.562598555</b>                                   |  |
| 207354_at   | CCL16          | 4.925519905 | 3.511236004   | 4.318421411      | 3.462159344         | -1.414283901           | -0.856262067                       | <b>0.558021835</b>                                   |  |
| 204635_at   | RPS6KA5        | 5.683074432 | 4.716303266   | 5.12605279       | 4.71715187          | -0.966771166           | -0.40890092                        | <b>0.557870247</b>                                   |  |
| 208343_s_at | NR5A2          | 5.576855258 | 4.552681106   | 4.811859613      | 4.338440935         | -1.024174153           | -0.473418678                       | <b>0.550755475</b>                                   |  |
| 215775_at   | ---            | 7.707925002 | 7.033262335   | 7.598009469      | 7.470935301         | -0.674662667           | -0.127074168                       | <b>0.547588498</b>                                   |  |
| 218711_s_at | SDPR           | 8.986571412 | 7.284239337   | 8.192686451      | 7.034226551         | -1.702332074           | -1.1584599                         | <b>0.543872174</b>                                   |  |
| 40687_at    | GJA4           | 5.219621926 | 3.780723815   | 4.388183284      | 3.48444866          | -1.438898111           | -0.903734624                       | <b>0.535163487</b>                                   |  |
| 207559_s_at | ZMYM3          | 6.238409276 | 5.643307388   | 5.987153312      | 5.918685448         | -0.595101888           | -0.068467864                       | <b>0.526634024</b>                                   |  |
| 206382_s_at | BDNF           | 5.11913362  | 4.343523798   | 4.806221991      | 4.556533195         | -0.775609822           | -0.249688796                       | <b>0.525921026</b>                                   |  |
| 201295_s_at | WSB1           | 8.65114204  | 7.567572216   | 7.355393998      | 6.785817343         | -1.083569824           | -0.569576655                       | <b>0.513993169</b>                                   |  |
| 218999_at   | TMEM140        | 8.186651709 | 6.974415048   | 8.541039483      | 7.837502282         | -1.212236661           | -0.703537201                       | <b>0.50869946</b>                                    |  |
| 216061_x_at | PDGFB          | 5.947930189 | 5.130552322   | 5.744645627      | 5.435470066         | -0.817377868           | -0.309175561                       | <b>0.508202307</b>                                   |  |
| 204249_s_at | LMO2           | 9.59814078  | 8.488072873   | 9.189193959      | 8.58056346          | -1.110067907           | -0.608630499                       | <b>0.501437408</b>                                   |  |
| 202540_s_at | HMGCR          | 6.110860472 | 5.205580138   | 5.901114097      | 5.493614957         | -0.905280334           | -0.40749914                        | <b>0.497781193</b>                                   |  |
| 213348_at   | CDKN1C         | 5.541727399 | 4.828329874   | 4.612126505      | 4.37437469          | -0.713397525           | -0.237751816                       | <b>0.47564571</b>                                    |  |
| 206127_at   | ELK3           | 5.277435106 | 4.069172981   | 5.174075106      | 4.439662807         | -1.208262125           | -0.734412299                       | <b>0.473849826</b>                                   |  |
| 221756_at   | PIK3IP1        | 6.398640194 | 4.917792485   | 6.205370136      | 5.191715421         | -1.480847708           | -1.013654715                       | <b>0.467192993</b>                                   |  |
| 203980_at   | FABP4          | 9.551390224 | 8.775171069   | 8.873671177      | 8.556276474         | -0.776219155           | -0.317394703                       | <b>0.458824452</b>                                   |  |
| 221123_x_at | ZNF395         | 5.966883225 | 5.205394821   | 5.681289691      | 5.377925557         | -0.761488405           | -0.303364133                       | <b>0.458124272</b>                                   |  |
| 204904_at   | GJA4           | 6.567220234 | 5.302604681   | 5.753143787      | 4.935297198         | -1.264615552           | -0.817846589                       | <b>0.446768963</b>                                   |  |

|             |          |             |             |             |             |              |              |                    |
|-------------|----------|-------------|-------------|-------------|-------------|--------------|--------------|--------------------|
| 201294_s_at | WSB1     | 8.967550792 | 7.922024308 | 8.09657401  | 7.496520381 | -1.045526483 | -0.600053629 | <b>0.445472854</b> |
| 212353_at   | SULF1    | 6.855906098 | 5.810023145 | 5.93881689  | 5.327721814 | -1.045882953 | -0.611095076 | <b>0.434787877</b> |
| 217028_at   | CXCR4    | 9.168396251 | 7.870083624 | 9.729104608 | 8.865188808 | -1.298312627 | -0.8639158   | <b>0.434396827</b> |
| 203153_at   | IFIT1    | 6.755179647 | 5.128565071 | 8.93863775  | 7.744305482 | -1.626614576 | -1.194332269 | <b>0.432282307</b> |
| 204315_s_at | GTSE1    | 4.71915756  | 3.912481748 | 4.077105924 | 3.699333729 | -0.806675812 | -0.377772195 | <b>0.428903617</b> |
| 217164_at   | ---      | 5.564255348 | 4.805740911 | 5.491066963 | 5.15751455  | -0.758514438 | -0.333552413 | <b>0.424962025</b> |
| 203508_at   | TNFRSF1B | 5.033324674 | 4.36146959  | 5.145958078 | 4.892185991 | -0.671855085 | -0.253772088 | <b>0.418082997</b> |
| 220751_s_at | C5orf4   | 5.586742546 | 4.176352579 | 4.78385966  | 3.779427263 | -1.410389967 | -1.004432397 | <b>0.40595757</b>  |
| 206289_at   | HOXA4    | 5.157402286 | 4.386646609 | 5.091557755 | 4.725101148 | -0.770755677 | -0.366456607 | <b>0.40429907</b>  |
| 48031_r_at  | C5orf4   | 5.02196417  | 4.154555391 | 4.510801792 | 4.042744089 | -0.867408779 | -0.468057703 | <b>0.399351076</b> |
| 203395_s_at | HES1     | 5.17190263  | 4.295061333 | 4.977285049 | 4.498700714 | -0.876841297 | -0.478584335 | <b>0.398256962</b> |
| 212095_s_at | MTUS1    | 8.627630812 | 7.438351547 | 8.519103305 | 7.722012328 | -1.189279265 | -0.797090977 | <b>0.392188288</b> |
| 209201_x_at | CXCR4    | 9.193491101 | 7.850086312 | 10.05970085 | 9.107454797 | -1.343404789 | -0.952246049 | <b>0.39115874</b>  |
| 208530_s_at | RARB     | 8.054411271 | 6.787652059 | 7.731879449 | 6.853821704 | -1.266759212 | -0.878057745 | <b>0.388701467</b> |
| 201565_s_at | ID2      | 6.789876436 | 5.904185564 | 6.778758573 | 6.281124544 | -0.885690872 | -0.49763403  | <b>0.388056842</b> |
| 219901_at   | FGD6     | 5.171130223 | 4.498066081 | 4.658349133 | 4.371595081 | -0.673064141 | -0.286754052 | <b>0.386310089</b> |
| 204917_s_at | MLLT3    | 4.678187493 | 4.016838419 | 4.605165363 | 4.316111928 | -0.661349074 | -0.289053434 | <b>0.37229564</b>  |
| 203408_s_at | SATB1    | 8.163533151 | 7.49097368  | 7.879846124 | 7.576359468 | -0.672559471 | -0.303486656 | <b>0.369072815</b> |
| 207574_s_at | GADD45B  | 7.19994109  | 6.489153134 | 6.590610483 | 6.248586564 | -0.710787956 | -0.342023919 | <b>0.368764037</b> |
| 219427_at   | FAT4     | 5.64566854  | 4.533326471 | 5.048825141 | 4.302269333 | -1.112342069 | -0.746555808 | <b>0.365786261</b> |
| 205466_s_at | HS3ST1   | 3.81994569  | 3.160238065 | 3.34849638  | 3.045166868 | -0.659707625 | -0.303329513 | <b>0.356378113</b> |
| 209050_s_at | RALGDS   | 7.624500766 | 6.438319708 | 7.301922361 | 6.456316694 | -1.186181059 | -0.845605667 | <b>0.340575391</b> |
| 212914_at   | CBX7     | 4.872461517 | 4.0963296   | 4.610036707 | 4.161873936 | -0.776131918 | -0.448162772 | <b>0.327969146</b> |
| 201368_at   | ZFP36L2  | 9.254404722 | 7.915923119 | 8.769023562 | 7.754696234 | -1.338481603 | -1.014327328 | <b>0.324154275</b> |
| 203917_at   | CXADR    | 6.862480984 | 5.914302556 | 7.215690753 | 6.591601425 | -0.948178428 | -0.624089327 | <b>0.3240891</b>   |
| 204358_s_at | FLRT2    | 7.692398088 | 6.995535537 | 7.552280593 | 7.178880239 | -0.696862552 | -0.373400354 | <b>0.323462198</b> |
| 216614_at   | ---      | 3.950212039 | 3.309138572 | 3.529984341 | 3.211080856 | -0.641073467 | -0.318903485 | <b>0.322169982</b> |
| 222372_at   | ---      | 6.026834029 | 5.207008809 | 5.893422847 | 5.39233812  | -0.81982522  | -0.501084727 | <b>0.318740493</b> |
| 217504_at   | ABCA6    | 5.33551132  | 4.531649994 | 4.919160732 | 4.432864654 | -0.803861326 | -0.486296078 | <b>0.317565248</b> |
| 201010_s_at | TXNIP    | 8.444760104 | 7.713328182 | 8.014070624 | 7.598933037 | -0.731431921 | -0.415137588 | <b>0.316294334</b> |
| 217502_at   | IFIT2    | 5.127427357 | 3.413431574 | 5.288333692 | 3.889822268 | -1.713995782 | -1.398511425 | <b>0.315484358</b> |
| 209662_at   | CETN3    | 6.902853516 | 6.232713978 | 6.137874516 | 5.778875703 | -0.670139538 | -0.358998813 | <b>0.311140725</b> |
| 203588_s_at | TFDP2    | 7.365631727 | 6.7168774   | 7.299789483 | 6.961992147 | -0.648754326 | -0.337797337 | <b>0.31095699</b>  |
| 211792_s_at | CDKN2C   | 5.374801921 | 4.689999856 | 5.223896377 | 4.847657374 | -0.684802065 | -0.376239003 | <b>0.308563062</b> |
| 201367_s_at | ZFP36L2  | 5.492056686 | 4.753396279 | 5.186398    | 4.755773063 | -0.738660407 | -0.430624937 | <b>0.308035471</b> |
| 213094_at   | GPR126   | 7.205384144 | 6.038900098 | 5.695781707 | 4.830745567 | -1.166484046 | -0.865036141 | <b>0.301447905</b> |
| 209304_x_at | GADD45B  | 5.777573616 | 5.127027171 | 5.29040807  | 4.941021355 | -0.650546445 | -0.349386715 | <b>0.30115973</b>  |
| 201009_s_at | TXNIP    | 7.879983251 | 7.106602098 | 7.731911725 | 7.256417543 | -0.773381153 | -0.475494182 | <b>0.29788697</b>  |
| 212151_at   | PBX1     | 5.175311466 | 4.485811241 | 4.515389855 | 4.119314304 | -0.689500225 | -0.396075551 | <b>0.293424674</b> |
| 209051_s_at | RALGDS   | 5.588744177 | 4.541156026 | 4.905130662 | 4.149138192 | -1.04758815  | -0.755992469 | <b>0.291595681</b> |
| 211538_s_at | HSPA2    | 5.679489779 | 4.696542777 | 5.040997279 | 4.347929205 | -0.982947001 | -0.693068074 | <b>0.289878927</b> |
| 214457_at   | HOXA2    | 4.329359997 | 3.619391569 | 3.972219557 | 3.547024676 | -0.709968427 | -0.425194881 | <b>0.284773546</b> |
| 204589_at   | NUAK1    | 9.415043235 | 8.191022683 | 9.465056999 | 8.525443065 | -1.224020552 | -0.939613934 | <b>0.284406617</b> |
| 212344_at   | SULF1    | 7.944694366 | 7.125295615 | 7.38551489  | 6.850395955 | -0.819398751 | -0.535118935 | <b>0.284279815</b> |
| 212909_at   | LYPD1    | 5.969289007 | 4.910058417 | 5.868567909 | 5.093242568 | -1.05923059  | -0.775325341 | <b>0.283905249</b> |

|             |                 |             |             |             |             |              |              |                    |
|-------------|-----------------|-------------|-------------|-------------|-------------|--------------|--------------|--------------------|
| 204159_at   | CDKN2C          | 5.350781188 | 4.364504183 | 4.814646984 | 4.112209615 | -0.986277005 | -0.702437369 | <b>0.283839636</b> |
| 206303_s_at | NUDT4           | 8.923246541 | 7.964207217 | 8.528036188 | 7.850447281 | -0.959039324 | -0.677588908 | <b>0.281450416</b> |
| 217317_s_at | HERC2P2 /// HEI | 10.00146518 | 9.290747442 | 9.398807008 | 8.968387762 | -0.710717736 | -0.430419246 | <b>0.280298489</b> |
| 212093_s_at | MTUS1           | 9.532434691 | 8.310260553 | 9.529887295 | 8.587978565 | -1.222174139 | -0.94190873  | <b>0.280265408</b> |
| 219147_s_at | C9orf95         | 8.076365295 | 7.271388057 | 7.289462972 | 6.761353211 | -0.804977239 | -0.528109761 | <b>0.276867477</b> |
| 204653_at   | TFAP2A          | 6.639573699 | 5.945551823 | 6.966380316 | 6.548630424 | -0.694021876 | -0.417749892 | <b>0.276271984</b> |
| 202481_at   | DHRS3           | 7.658698697 | 6.223374954 | 7.586713937 | 6.426657018 | -1.435323743 | -1.160056919 | <b>0.275266823</b> |
| 219416_at   | SCARA3          | 5.354622485 | 4.769157812 | 5.323441921 | 5.009287229 | -0.585464673 | -0.314154692 | <b>0.271309981</b> |
| 207220_at   | ART4            | 6.055558984 | 4.86241372  | 6.594490327 | 5.671897576 | -1.193145264 | -0.922592751 | <b>0.270552513</b> |

**Supplementary Table 10. Gene categories of genes inhibited by Ox-PAPC by 1.5 fold and the inhibition was reversed by ADAM10 silencing by 1.2 fold.**

DAVID analysis used for the identification of gene categories.

<http://david.abcc.ncifcrf.gov/home.jsp>

| Category        | Term                                                       | Count | %           | PValue      | Genes                           | List Total | Pop Hits | Pop Total | Fold Enrichm | Bonferroni | Benjamini  | FDR        |
|-----------------|------------------------------------------------------------|-------|-------------|-------------|---------------------------------|------------|----------|-----------|--------------|------------|------------|------------|
| SP_PIR_KEYWORDS | chromosomal rearrangement                                  | 10    | 10.30927835 | 9.88E-06    | 204917_S_AT, 204200_S_AT, 21601 | 96         | 279      | 19235     | 7.18152628   | 0.00159871 | 0.00159871 | 0.01195033 |
| GOTERM_BP_FAT   | GO:0042127~regulation of cell proliferation                | 17    | 17.5257732  | 1.01E-05    | 219534_X_AT, 204526_S_AT, 2039  | 80         | 787      | 13528     | 3.65273189   | 0.00992102 | 0.00992102 | 0.01591873 |
| SP_PIR_KEYWORDS | Proto-oncogene                                             | 9     | 9.278350515 | 1.84E-05    | 204917_S_AT, 204200_S_AT, 21601 | 96         | 230      | 19235     | 7.84035326   | 0.00297591 | 0.00148906 | 0.02225906 |
| GOTERM_BP_FAT   | GO:0045596~negative regulation of cell differentiation     | 9     | 9.278350515 | 3.66E-05    | 203504_S_AT, 203920_AT, 206382  | 80         | 216      | 13528     | 7.04583333   | 0.035503   | 0.01791192 | 0.05770175 |
| GOTERM_MF_FAT   | GO:0016564~transcription repressor activity                | 9     | 9.278350515 | 3.83E-04    | 213348_AT, 219534_X_AT, 207826  | 74         | 316      | 12983     | 4.99687821   | 0.07839493 | 0.07839493 | 0.48417571 |
| GOTERM_BP_FAT   | GO:0048568~embryonic organ development                     | 7     | 7.216494845 | 5.00E-04    | 206289_AT, 208530_S_AT, 214457  | 80         | 172      | 13528     | 6.88197674   | 0.38966487 | 0.15175211 | 0.78526664 |
| GOTERM_MF_FAT   | GO:0030528~transcription regulator activity                | 20    | 20.6185567  | 5.27E-04    | 201368_AT, 219534_X_AT, 202704  | 74         | 1512     | 12983     | 2.32071357   | 0.10617853 | 0.05457868 | 0.66511482 |
| GOTERM_BP_FAT   | GO:0007389~pattern specification process                   | 8     | 8.24742268  | 9.31E-04    | 204917_S_AT, 206289_AT, 209201  | 80         | 267      | 13528     | 5.06666667   | 0.60172522 | 0.20558817 | 1.45919227 |
| GOTERM_BP_FAT   | GO:0003002~regionalization                                 | 7     | 7.216494845 | 0.001016704 | 204917_S_AT, 206289_AT, 214457  | 80         | 197      | 13528     | 6.00862944   | 0.63396057 | 0.1820899  | 1.59189964 |
| GOTERM_BP_FAT   | GO:0051252~regulation of RNA metabolic process             | 22    | 22.68041237 | 0.001320192 | 201368_AT, 204917_S_AT, 219534  | 80         | 1813     | 13528     | 2.05195808   | 0.72888481 | 0.19550075 | 2.06246566 |
| GOTERM_BP_FAT   | GO:0007379~segment specification                           | 3     | 3.092783505 | 0.001789832 | 204917_S_AT, 214457_AT, 218559  | 80         | 11       | 13528     | 46.1181818   | 0.82965652 | 0.22341435 | 2.7865015  |
| GOTERM_BP_FAT   | GO:0048598~embryonic morphogenesis                         | 8     | 8.24742268  | 0.002076665 | 206289_AT, 208530_S_AT, 214457  | 80         | 307      | 13528     | 4.40651466   | 0.87176336 | 0.22642662 | 3.22623722 |
| GOTERM_BP_FAT   | GO:0006357~regulation of transcription from RNA polyme     | 12    | 12.37113402 | 0.003205474 | 203920_AT, 219534_X_AT, 201565  | 80         | 727      | 13528     | 2.7911967    | 0.95808433 | 0.29703984 | 4.93875872 |
| GOTERM_BP_FAT   | GO:0045859~regulation of protein kinase activity           | 8     | 8.24742268  | 0.003971274 | 202540_S_AT, 207574_S_AT, 2195  | 80         | 345      | 13528     | 3.92115942   | 0.9803844  | 0.32506779 | 6.08435088 |
| GOTERM_BP_FAT   | GO:0000122~negative regulation of transcription from RN    | 7     | 7.216494845 | 0.00457981  | 213348_AT, 219534_X_AT, 207826  | 80         | 266      | 13528     | 4.45         | 0.98927573 | 0.33787112 | 6.98545236 |
| GOTERM_BP_FAT   | GO:0043549~regulation of kinase activity                   | 8     | 8.24742268  | 0.00478227  | 202540_S_AT, 207574_S_AT, 2195  | 80         | 357      | 13528     | 3.78935574   | 0.99122823 | 0.32610752 | 7.28344839 |
| GOTERM_BP_FAT   | GO:0008285~negative regulation of cell proliferation       | 8     | 8.24742268  | 0.005078667 | 213348_AT, 219534_X_AT, 204159  | 80         | 361      | 13528     | 3.74736842   | 0.99346451 | 0.32088322 | 7.71809765 |
| GOTERM_BP_FAT   | GO:0016481~negative regulation of transcription            | 9     | 9.278350515 | 0.005239351 | 213348_AT, 219534_X_AT, 207826  | 80         | 459      | 13528     | 3.31568627   | 0.99442848 | 0.30976316 | 7.95293183 |
| GOTERM_BP_FAT   | GO:0048545~response to steroid hormone stimulus            | 6     | 6.18556701  | 0.0052755   | 215719_X_AT, 204200_S_AT, 2160  | 80         | 192      | 13528     | 5.284375     | 0.99462497 | 0.29418309 | 8.00568578 |
| GOTERM_BP_FAT   | GO:0031327~negative regulation of cellular biosynthetic pi | 10    | 10.30927835 | 0.00528499  | 219534_X_AT, 203980_AT, 201565  | 80         | 561      | 13528     | 3.01426025   | 0.99467574 | 0.27907024 | 8.01953037 |
| GOTERM_BP_FAT   | GO:0006355~regulation of transcription, DNA-dependent      | 20    | 20.6185567  | 0.005673596 | 204917_S_AT, 203588_S_AT, 2039  | 80         | 1773     | 13528     | 1.90751041   | 0.9963807  | 0.82156139 | 8.58477162 |
| GOTERM_BP_FAT   | GO:0051338~regulation of transferase activity              | 8     | 8.24742268  | 0.005965445 | 202540_S_AT, 207574_S_AT, 2195  | 80         | 372      | 13528     | 3.63655914   | 0.9972919  | 0.27993746 | 9.00713518 |
| GOTERM_BP_FAT   | GO:0009890~negative regulation of biosynthetic process     | 10    | 10.30927835 | 0.006052648 | 219534_X_AT, 203980_AT, 201565  | 80         | 573      | 13528     | 2.95113438   | 0.99751675 | 0.27071745 | 9.13297938 |
| GOTERM_BP_FAT   | GO:0008202~steroid metabolic process                       | 6     | 6.18556701  | 0.006518078 | 202540_S_AT, 203504_S_AT, 2094  | 80         | 202      | 13528     | 5.02277228   | 0.99843668 | 0.2760602  | 9.80190292 |
| GOTERM_BP_FAT   | GO:0048562~embryonic organ morphogenesis                   | 5     | 5.154639175 | 0.007598865 | 206289_AT, 208530_S_AT, 214457  | 80         | 133      | 13528     | 6.35714286   | 0.99946666 | 0.30153749 | 11.3374777 |
| GOTERM_MF_FAT   | GO:0003700~transcription factor activity                   | 13    | 13.40206186 | 0.007780193 | 201368_AT, 203588_S_AT, 203920  | 74         | 975      | 12983     | 2.33927928   | 0.81055592 | 0.42567153 | 9.4172946  |
| GOTERM_BP_FAT   | GO:0045637~regulation of myeloid cell differentiation      | 4     | 4.12371134  | 0.007924291 | 215719_X_AT, 201565_S_AT, 2042  | 80         | 70       | 13528     | 9.66285714   | 0.99961427 | 0.30043057 | 11.7950223 |
| GOTERM_BP_FAT   | GO:0010629~negative regulation of gene expression          | 9     | 9.278350515 | 0.009026752 | 213348_AT, 219534_X_AT, 207826  | 80         | 504      | 13528     | 3.103964286  | 0.99987142 | 0.3226171  | 13.326853  |
| GOTERM_BP_FAT   | GO:0009952~anterior/posterior pattern formation            | 5     | 5.154639175 | 0.009069501 | 204917_S_AT, 206289_AT, 214457  | 80         | 140      | 13528     | 6.03928571   | 0.99987678 | 0.31275506 | 13.3876478 |
| GOTERM_BP_FAT   | GO:0035295~tube development                                | 6     | 6.18556701  | 0.009250268 | 206382_S_AT, 209201_X_AT, 2170  | 80         | 220      | 13528     | 4.61181818   | 0.9998971  | 0.3073787  | 13.6365627 |
| SP_PIR_KEYWORDS | transcription regulation                                   | 19    | 19.58762887 | 0.009686545 | 204917_S_AT, 203588_S_AT, 2039  | 96         | 2026     | 19235     | 1.87903607   | 0.79337918 | 0.40881325 | 11.1111443 |
| UP_SEQ_FEATURE  | region of interest:Ligand-binding                          | 3     | 3.092783505 | 0.009713802 | 203920_AT, 208337_S_AT, 208530  | 96         | 30       | 19113     | 19.909375    | 0.9853986  | 0.9853986  | 12.8658209 |
| GOTERM_BP_FAT   | GO:0045934~negative regulation of nucleobase, nucleosid    | 9     | 9.278350515 | 0.009872982 | 213348_AT, 219534_X_AT, 207826  | 80         | 512      | 13528     | 2.97246094   | 0.99994471 | 0.31410974 | 14.4889159 |
| SP_PIR_KEYWORDS | peroxisome                                                 | 4     | 4.12371134  | 0.010057446 | 202540_S_AT, 209424_S_AT, 2045  | 96         | 90       | 19235     | 8.90509259   | 0.8055451  | 0.33594397 | 11.5131509 |
| GOTERM_BP_FAT   | GO:0048706~embryonic skeletal system development           | 4     | 4.12371134  | 0.010285903 | 206289_AT, 214457_AT, 204653_A  | 80         | 77       | 13528     | 8.78441558   | 0.99996339 | 0.31500037 | 15.0497593 |
| GOTERM_BP_FAT   | GO:0051172~negative regulation of nitrogen compound m      | 9     | 9.278350515 | 0.010660987 | 213348_AT, 219534_X_AT, 207826  | 80         | 519      | 13528     | 2.93236994   | 0.99997482 | 0.31490661 | 15.556222  |
| KEGG_PATHWAY    | hsa04110:Cell cycle                                        | 5     | 5.154639175 | 0.011159648 | 213348_AT, 203588_S_AT, 219534  | 37         | 125      | 5085      | 5.4972973    | 0.46658392 | 0.46658392 | 10.4894807 |
| KEGG_PATHWAY    | hsa04115:p53 signaling pathway                             | 4     | 4.12371134  | 0.011917746 | 204315_S_AT, 215719_X_AT, 2075  | 37         | 68       | 5085      | 8.08426073   | 0.48900864 | 0.2851634  | 11.4647951 |
| SP_PIR_KEYWORDS | Transcription                                              | 19    | 19.58762887 | 0.012004098 | 204917_S_AT, 203588_S_AT, 2039  | 96         | 2071     | 19235     | 1.83820719   | 0.85863783 | 0.32381328 | 13.5958466 |
| GOTERM_BP_FAT   | GO:0051726~regulation of cell cycle                        | 7     | 7.216494845 | 0.012775576 | 204315_S_AT, 213348_AT, 219534  | 80         | 331      | 13528     | 3.57613293   | 0.99999696 | 0.35470961 | 18.3589723 |
| GOTERM_CC_FAT   | GO:0005777~peroxisome                                      | 4     | 4.12371134  | 0.013044551 | 202540_S_AT, 209424_S_AT, 2045  | 62         | 103      | 12782     | 8.0062637    | 0.80371094 | 0.80371094 | 14.0687165 |
| GOTERM_CC_FAT   | GO:0042579~microbody                                       | 4     | 4.12371134  | 0.013044551 | 202540_S_AT, 209424_S_AT, 2045  | 62         | 103      | 12782     | 8.0062637    | 0.80371094 | 0.80371094 | 14.0687165 |
| GOTERM_BP_FAT   | GO:0044092~negative regulation of molecular function       | 7     | 7.216494845 | 0.013308535 | 202540_S_AT, 213348_AT, 219534  | 80         | 334      | 13528     | 3.54401198   | 0.99999822 | 0.35675981 | 19.0514975 |
| GOTERM_BP_FAT   | GO:0006694~steroid biosynthetic process                    | 4     | 4.12371134  | 0.013435353 | 202540_S_AT, 209424_S_AT, 2069  | 80         | 85       | 13528     | 7.95764706   | 0.99999843 | 0.35020622 | 19.2154725 |
| GOTERM_BP_FAT   | GO:0010558~negative regulation of macromolecule biosyn     | 9     | 9.278350515 | 0.014288476 | 213348_AT, 219534_X_AT, 207826  | 80         | 547      | 13528     | 2.78226691   | 0.99999933 | 0.35875186 | 20.3104934 |
| GOTERM_BP_FAT   | GO:0007049~cell cycle                                      | 11    | 11.34020619 | 0.014540078 | 211538_S_AT, 204315_S_AT, 2035  | 80         | 776      | 13528     | 2.39703608   | 0.99999948 | 0.35500773 | 20.6307712 |
| GOTERM_BP_FAT   | GO:0033673~negative regulation of kinase activity          | 4     | 4.12371134  | 0.015653102 | 202540_S_AT, 213348_AT, 219534  | 80         | 90       | 13528     | 7.51555556   | 0.99999983 | 0.36774236 | 22.0331902 |
| GOTERM_BP_FAT   | GO:0045665~negative regulation of neuron differentiation   | 3     | 3.092783505 | 0.015814517 | 214457_AT, 203395_S_AT, 212151  | 80         | 33       | 13528     | 15.3727273   | 0.99999986 | 0.36236475 | 22.2346372 |
| GOTERM_BP_FAT   | GO:0001709~cell fate determination                         | 3     | 3.092783505 | 0.015814517 | 214457_AT, 203395_S_AT, 219825  | 80         | 33       | 13528     | 15.3727273   | 0.99999986 | 0.36236475 | 22.2346372 |
| GOTERM_BP_FAT   | GO:0051056~regulation of small GTPase mediated signal tr   | 6     | 6.18556701  | 0.015897901 | 204526_S_AT, 209051_S_AT, 2127  | 80         | 252      | 13528     | 4.02619048   | 0.99999987 | 0.35584408 | 22.3385101 |

|                 |                                                             |    |             |                                             |    |      |       |            |             |            |            |
|-----------------|-------------------------------------------------------------|----|-------------|---------------------------------------------|----|------|-------|------------|-------------|------------|------------|
| GOTERM_BP_FAT   | GO:0035284~brain segmentation                               | 2  | 2.06185567  | 0.017418391 214457_AT, 218559_S_AT          | 80 | 3    | 13528 | 112.733333 | 0.999999997 | 0.3745079  | 24.2099634 |
| GOTERM_BP_FAT   | GO:0035283~central nervous system segmentation              | 2  | 2.06185567  | 0.017418391 214457_AT, 218559_S_AT          | 80 | 3    | 13528 | 112.733333 | 0.999999997 | 0.3745079  | 24.2099634 |
| GOTERM_BP_FAT   | GO:0001657~ureteric bud development                         | 3  | 3.092783505 | 0.017688088 206382_S_AT, 208530_S_AT, 2121! | 80 | 35   | 13528 | 14.4942857 | 0.999999998 | 0.37124034 | 24.5374702 |
| GOTERM_BP_FAT   | GO:0045892~negative regulation of transcription, DNA-dep    | 7  | 7.216494845 | 0.017703261 213348_AT, 219534_X_AT, 207826  | 80 | 356  | 13528 | 3.325      | 0.999999998 | 0.36396386 | 24.5558557 |
| GOTERM_BP_FAT   | GO:0031328~positive regulation of cellular biosynthetic pr  | 10 | 10.30927835 | 0.018056717 203504_S_AT, 203920_AT, 215775  | 80 | 685  | 13528 | 2.46861314 | 0.999999998 | 0.36242075 | 24.9829696 |
| GOTERM_BP_FAT   | GO:0043583~ear development                                  | 4  | 4.12371134  | 0.018065238 206382_S_AT, 214457_AT, 203395  | 80 | 95   | 13528 | 7.12       | 0.999999998 | 0.35551797 | 24.9932389 |
| GOTERM_BP_FAT   | GO:0051348~negative regulation of transferase activity      | 4  | 4.12371134  | 0.018571124 202540_S_AT, 213348_AT, 219534  | 80 | 96   | 13528 | 7.04583333 | 0.999999999 | 0.35658866 | 25.6005322 |
| GOTERM_MF_FAT   | GO:0005083~small GTPase regulator activity                  | 6  | 6.18556701  | 0.018912816 204526_S_AT, 209051_S_AT, 2127! | 74 | 274  | 12983 | 3.84188203 | 0.9828715   | 0.63823226 | 21.4778344 |
| GOTERM_BP_FAT   | GO:0042325~regulation of phosphorylation                    | 8  | 8.24742268  | 0.01892557 202540_S_AT, 207574_S_AT, 2195:  | 80 | 466  | 13528 | 2.90300429 | 0.999999999 | 0.35532922 | 26.0232815 |
| GOTERM_BP_FAT   | GO:0051253~negative regulation of RNA metabolic proces:     | 7  | 7.216494845 | 0.019057073 213348_AT, 219534_X_AT, 207826  | 80 | 362  | 13528 | 3.2698895  | 0.999999999 | 0.35082172 | 26.1795528 |
| GOTERM_BP_FAT   | GO:0009891~positive regulation of biosynthetic process      | 10 | 10.30927835 | 0.019648031 203504_S_AT, 203920_AT, 215775  | 80 | 695  | 13528 | 2.43309353 | 1           | 0.35317383 | 26.8780072 |
| GOTERM_MF_FAT   | GO:0043565~sequence-specific DNA binding                    | 9  | 9.278350515 | 0.020250579 203920_AT, 206289_AT, 208337_S  | 74 | 607  | 12983 | 2.60134022 | 0.9871915   | 0.58168865 | 22.8229352 |
| SP_PIR_KEYWORDS | dna-binding                                                 | 17 | 17.5257732  | 0.020251364 201368_AT, 203588_S_AT, 203920  | 96 | 1868 | 19235 | 1.82344642 | 0.96364399  | 0.42443281 | 21.9302027 |
| GOTERM_BP_FAT   | GO:0055092~sterol homeostasis                               | 3  | 3.092783505 | 0.020665102 203504_S_AT, 203980_AT, 208337  | 80 | 38   | 13528 | 13.35      | 1           | 0.36141516 | 28.0656126 |
| GOTERM_BP_FAT   | GO:0042632~cholesterol homeostasis                          | 3  | 3.092783505 | 0.020665102 203504_S_AT, 203980_AT, 208337  | 80 | 38   | 13528 | 13.35      | 1           | 0.36141516 | 28.0656126 |
| SP_PIR_KEYWORDS | repressor                                                   | 7  | 7.216494845 | 0.020798409 209431_S_AT, 203395_S_AT, 2034! | 96 | 435  | 19235 | 3.22425766 | 0.96678901  | 0.36517707 | 22.4560379 |
| UP_SEQ_FEATURE  | zinc finger region:NR C4-type                               | 3  | 3.092783505 | 0.021068997 203920_AT, 208337_S_AT, 208530  | 96 | 45   | 19113 | 13.2729167 | 0.999901    | 0.99004993 | 25.9504977 |
| UP_SEQ_FEATURE  | DNA-binding region:Nuclear receptor                         | 3  | 3.092783505 | 0.021068997 203920_AT, 208337_S_AT, 208530  | 96 | 45   | 19113 | 13.2729167 | 0.999901    | 0.99004993 | 25.9504977 |
| GOTERM_BP_FAT   | GO:0045944~positive regulation of transcription from RNA    | 7  | 7.216494845 | 0.021218644 203920_AT, 208337_S_AT, 208530  | 80 | 371  | 13528 | 3.19056604 | 1           | 0.36290929 | 28.7043524 |
| GOTERM_BP_FAT   | GO:0045449~regulation of transcription                      | 24 | 24.74226804 | 0.021947172 204917_S_AT, 219534_X_AT, 2033: | 80 | 2601 | 13528 | 1.56032295 | 1           | 0.36667844 | 29.5369159 |
| OMIM_DISEASE    | Common variants at 30 loci contribute to polygenic dyslipic | 3  | 3.092783505 | 0.022012432 202540_S_AT, 203504_S_AT, 2185! | 20 | 45   | 3671  | 12.2366667 | 0.64080245  | 0.64080245 | 18.9724846 |
| GOTERM_BP_FAT   | GO:0051329~interphase of mitotic cell cycle                 | 4  | 4.12371134  | 0.02233217 204315_S_AT, 213348_AT, 219534   | 80 | 103  | 13528 | 6.56699029 | 1           | 0.36580168 | 29.9732059 |
| GOTERM_BP_FAT   | GO:0032318~regulation of Ras GTPase activity                | 4  | 4.12371134  | 0.022900917 204526_S_AT, 212796_S_AT, 2199! | 80 | 104  | 13528 | 6.50384615 | 1           | 0.36731610 | 30.6130981 |
| GOTERM_BP_FAT   | GO:0051174~regulation of phosphorus metabolic process       | 8  | 8.24742268  | 0.022978845 202540_S_AT, 207574_S_AT, 2195: | 80 | 485  | 13528 | 2.78927835 | 1           | 0.36259699 | 30.7003468 |
| GOTERM_BP_FAT   | GO:0019220~regulation of phosphate metabolic process        | 8  | 8.24742268  | 0.022978845 202540_S_AT, 207574_S_AT, 2195: | 80 | 485  | 13528 | 2.78927835 | 1           | 0.36259699 | 30.7003468 |
| GOTERM_MF_FAT   | GO:0019955~cytokine binding                                 | 4  | 4.12371134  | 0.023418513 203508_AT, 209201_X_AT, 217028  | 74 | 109  | 12983 | 6.43838334 | 0.99357449  | 0.56882726 | 25.9240545 |
| GOTERM_BP_FAT   | GO:0006915~apoptosis                                        | 9  | 9.278350515 | 0.023929345 215719_X_AT, 207574_S_AT, 2026: | 80 | 602  | 13528 | 2.52807309 | 1           | 0.36883361 | 31.7562911 |
| INTERPRO        | IPR001628:Zinc finger, nuclear hormone receptor-type        | 3  | 3.092783505 | 0.024049719 203920_AT, 208337_S_AT, 208530  | 88 | 46   | 16659 | 12.3460968 | 0.99755296  | 0.99755296 | 27.0682736 |
| GOTERM_BP_FAT   | GO:0051325~interphase                                       | 4  | 4.12371134  | 0.024062017 204315_S_AT, 213348_AT, 219534  | 80 | 106  | 13528 | 6.38113208 | 1           | 0.36494077 | 31.9024762 |
| GOTERM_BP_FAT   | GO:0051789~response to protein stimulus                     | 4  | 4.12371134  | 0.024654368 211538_S_AT, 215719_X_AT, 2078  | 80 | 107  | 13528 | 6.32149533 | 1           | 0.36665332 | 32.551592  |
| GOTERM_MF_FAT   | GO:0008134~transcription factor binding                     | 8  | 8.24742268  | 0.024885843 203588_S_AT, 203920_AT, 207826  | 74 | 513  | 12983 | 2.73599916 | 0.99533541  | 0.53551325 | 27.3211822 |
| INTERPRO        | IPR001723:Steroid hormone receptor                          | 3  | 3.092783505 | 0.025034608 203920_AT, 208337_S_AT, 208530  | 88 | 47   | 16659 | 12.0834139 | 0.99809308  | 0.95633171 | 28.0168474 |
| GOTERM_BP_FAT   | GO:0012501~regulation of nucleobase, nucleoside             | 9  | 9.278350515 | 0.02586137 215719_X_AT, 207574_S_AT, 2026:  | 80 | 611  | 13528 | 2.49083747 | 1           | 0.37542071 | 33.8563662 |
| INTERPRO        | IPR008946:Nuclear hormone receptor, ligand-binding          | 3  | 3.092783505 | 0.026035759 203920_AT, 208337_S_AT, 208530  | 88 | 48   | 16659 | 11.8316761 | 0.99852047  | 0.88605166 | 28.9694027 |
| INTERPRO        | IPR000536:Nuclear hormone receptor, ligand-binding, core    | 3  | 3.092783505 | 0.026035759 203920_AT, 208337_S_AT, 208530  | 88 | 48   | 16659 | 11.8316761 | 0.99852047  | 0.88605166 | 28.9694027 |
| SP_PIR_KEYWORDS | cell cycle                                                  | 7  | 7.216494845 | 0.026693081 213348_AT, 203588_S_AT, 219534  | 96 | 461  | 19235 | 3.04241233 | 0.98751268  | 0.42182586 | 27.9196553 |
| GOTERM_BP_FAT   | GO:0010605~negative regulation of macromolecule metab       | 10 | 10.30927835 | 0.026841601 213348_AT, 219534_X_AT, 207826  | 80 | 734  | 13528 | 2.30381471 | 1           | 0.38123776 | 34.8985648 |
| GOTERM_BP_FAT   | GO:0006720~isoprenoid metabolic process                     | 3  | 3.092783505 | 0.027191271 202540_S_AT, 202481_AT, 219825  | 80 | 44   | 13528 | 11.5295455 | 1           | 0.3798797  | 35.2666039 |
| GOTERM_BP_FAT   | GO:0001656~metanephros development                          | 3  | 3.092783505 | 0.027191271 206382_S_AT, 208530_S_AT, 2121! | 80 | 44   | 13528 | 11.5295455 | 1           | 0.3798797  | 35.2666039 |
| GOTERM_BP_FAT   | GO:0046890~regulation of lipid biosynthetic process         | 3  | 3.092783505 | 0.02834994 203920_AT, 204200_S_AT, 216061   | 80 | 45   | 13528 | 11.2733333 | 1           | 0.38731493 | 36.4722591 |
| GOTERM_BP_FAT   | GO:0043433~negative regulation of transcription factor ac   | 3  | 3.092783505 | 0.02834994 207826_S_AT, 201565_S_AT, 2139:  | 80 | 45   | 13528 | 11.2733333 | 1           | 0.38731493 | 36.4722591 |
| PIR_SUPERFAMILY | PIRSF005680:interferon-induced 56K protein                  | 2  | 2.06185567  | 0.028741389 217502_AT, 203153_AT            | 44 | 5    | 7396  | 67.2363636 | 0.81029085  | 0.81029085 | 25.1036308 |
| GOTERM_BP_FAT   | GO:0045935~positive regulation of nucleobase, nucleoside    | 9  | 9.278350515 | 0.028842359 203504_S_AT, 203920_AT, 204200  | 80 | 624  | 13528 | 2.43894231 | 1           | 0.3874284  | 36.9782512 |
| GOTERM_BP_FAT   | GO:0045647~negative regulation of erythrocyte differentia   | 2  | 2.06185567  | 0.028863877 204249_S_AT, 218559_S_AT        | 80 | 5    | 13528 | 67.64      | 1           | 0.38262962 | 37.0002757 |
| INTERPRO        | IPR013088:Zinc finger, NHR/GATA-type                        | 3  | 3.092783505 | 0.029134864 203920_AT, 208337_S_AT, 208530  | 88 | 51   | 16659 | 11.1356952 | 0.99932664  | 0.83891228 | 31.8448377 |
| SP_PIR_KEYWORDS | tumor suppressor                                            | 4  | 4.12371134  | 0.030430813 213348_AT, 219534_X_AT, 204159  | 96 | 137  | 19235 | 5.85006083 | 0.99330476  | 0.42665175 | 31.1986666 |
| SP_PIR_KEYWORDS | metal-binding                                               | 23 | 23.71134021 | 0.030815317 201368_AT, 202688_AT, 207559_S  | 96 | 2972 | 19235 | 1.55060075 | 0.99372144  | 0.39773728 | 31.5280989 |
| INTERPRO        | IPR006694:Fatty acid hydroxylase                            | 2  | 2.06185567  | 0.030932731 206932_AT, 220751_S_AT, 48031_  | 88 | 6    | 16659 | 63.1022727 | 0.99957399  | 0.78822051 | 33.4633162 |
| GOTERM_MF_FAT   | GO:0003707~steroid hormone receptor activity                | 3  | 3.092783505 | 0.030937102 203920_AT, 208337_S_AT, 208530  | 74 | 49   | 12983 | 10.7415885 | 0.99876129  | 0.56686717 | 32.8033424 |
| GOTERM_BP_FAT   | GO:0035282~segmentation                                     | 3  | 3.092783505 | 0.031942296 204917_S_AT, 214457_AT, 218559  | 80 | 48   | 13528 | 10.568875  | 1           | 0.40891981 | 40.0779682 |
| GOTERM_BP_FAT   | GO:0051101~regulation of DNA binding                        | 4  | 4.12371134  | 0.033770575 207826_S_AT, 201565_S_AT, 2139: | 80 | 121  | 13528 | 5.59008264 | 1           | 0.42157546 | 41.8385609 |
| GOTERM_BP_FAT   | GO:0022403~cell cycle phase                                 | 7  | 7.216494845 | 0.033852871 211538_S_AT, 204315_S_AT, 2133: | 80 | 414  | 13528 | 2.85917874 | 1           | 0.41730613 | 41.9166593 |
| GOTERM_BP_FAT   | GO:0008284~positive regulation of cell proliferation        | 7  | 7.216494845 | 0.033852871 204200_S_AT, 204526_S_AT, 2160! | 80 | 414  | 13528 | 2.85917874 | 1           | 0.41730613 | 41.9166593 |
| GOTERM_BP_FAT   | GO:0051173~positive regulation of nitrogen compound me      | 9  | 9.278350515 | 0.033883977 203504_S_AT, 203920_AT, 204200  | 80 | 644  | 13528 | 2.36319876 | 1           | 0.41265999 | 41.9461531 |
| GOTERM_BP_FAT   | GO:0046578~regulation of Ras protein signal transduction    | 5  | 5.154639175 | 0.034388223 204526_S_AT, 212796_S_AT, 2199! | 80 | 210  | 13528 | 4.02619048 | 1           | 0.41251224 | 42.4223103 |





|                 |                                                                |    |             |             |                                |    |      |       |            |            |            |            |
|-----------------|----------------------------------------------------------------|----|-------------|-------------|--------------------------------|----|------|-------|------------|------------|------------|------------|
| GOTERM_BP_FAT   | GO:0008354~germ cell migration                                 | 2  | 2.06185567  | 0.067896079 | 202540_S_AT, 209201_X_AT, 2170 | 80 | 12   | 13528 | 28.1833333 | 1          | 0.49055796 | 67.0171852 |
| GOTERM_BP_FAT   | GO:0010745~negative regulation of foam cell differentiat       | 2  | 2.06185567  | 0.067896079 | 203504_S_AT, 203920_AT         | 80 | 12   | 13528 | 28.1833333 | 1          | 0.49055796 | 67.0171852 |
| SP_PIR_KEYWORDS | magnesium                                                      | 6  | 6.18556701  | 0.067934537 | 219147_S_AT, 212182_AT, 206303 | 96 | 442  | 19235 | 2.71988122 | 0.99998877 | 0.61316424 | 57.313907  |
| GOTERM_BP_FAT   | GO:0006766~vitamin metabolic process                           | 3  | 3.092783505 | 0.071101615 | 219147_S_AT, 202481_AT, 219825 | 80 | 75   | 13528 | 6.764      | 1          | 0.50375291 | 68.7618202 |
| UP_SEQ_FEATURE  | cross-link:Glycyl lysine isopeptide (Lys-Gly) (interchain with | 3  | 3.092783505 | 0.072489625 | 204653_AT, 203408_S_AT, 218559 | 96 | 89   | 19113 | 6.71102528 | 1          | 0.99561969 | 65.4136952 |
| GOTERM_BP_FAT   | GO:0050767~regulation of neurogenesis                          | 4  | 4.12371134  | 0.07307828  | 206382_S_AT, 214457_AT, 203395 | 80 | 166  | 13528 | 4.0746988  | 1          | 0.51034423 | 69.7941459 |
| GOTERM_BP_FAT   | GO:0010595~positive regulation of endothelial cell migrati     | 2  | 2.06185567  | 0.073344156 | 204200_S_AT, 216061_X_AT, 2157 | 80 | 13   | 13528 | 26.0153846 | 1          | 0.508351   | 69.9305374 |
| GOTERM_BP_FAT   | GO:0008045~motor axon guidance                                 | 2  | 2.06185567  | 0.073344156 | 209201_X_AT, 217028_AT, 214457 | 80 | 13   | 13528 | 26.0153846 | 1          | 0.508351   | 69.9305374 |
| GOTERM_BP_FAT   | GO:0030511~positive regulation of transforming growth fa       | 2  | 2.06185567  | 0.073344156 | 213348_AT, 219534_X_AT, 215775 | 80 | 13   | 13528 | 26.0153846 | 1          | 0.508351   | 69.9305374 |
| SP_PIR_KEYWORDS | isopeptide bond                                                | 5  | 5.154639175 | 0.073385846 | 215023_S_AT, 201009_S_AT, 2046 | 96 | 319  | 19235 | 3.14051071 | 0.99999566 | 0.61317927 | 60.2387017 |
| SP_PIR_KEYWORDS | lipid-binding                                                  | 3  | 3.092783505 | 0.074508092 | 218711_S_AT, 203980_AT, 208337 | 96 | 91   | 19235 | 6.60542582 | 0.99999643 | 0.59179037 | 60.8175113 |
| GOTERM_BP_FAT   | GO:0051384~response to glucocorticoid stimulus                 | 3  | 3.092783505 | 0.076098945 | 215719_X_AT, 203980_AT, 213910 | 80 | 78   | 13528 | 6.50384615 | 1          | 0.5184984  | 71.3101694 |
| SP_PIR_KEYWORDS | protein kinase inhibitor                                       | 2  | 2.06185567  | 0.076190488 | 213348_AT, 219534_X_AT, 204159 | 96 | 16   | 19235 | 25.0455729 | 0.99999734 | 0.57509657 | 61.6707563 |
| GOTERM_MF_FAT   | GO:0030695~GTPase regulator activity                           | 6  | 6.18556701  | 0.076764925 | 204526_S_AT, 209051_S_AT, 2127 | 74 | 404  | 12983 | 2.60563286 | 0.99999996 | 0.75773357 | 63.6298589 |
| GOTERM_BP_FAT   | GO:0048839~inner ear development                               | 3  | 3.092783505 | 0.077789107 | 206382_S_AT, 203395_S_AT, 2185 | 80 | 79   | 13528 | 6.42151899 | 1          | 0.52328162 | 72.1270364 |
| GOTERM_BP_FAT   | GO:0002520~immune system development                           | 5  | 5.154639175 | 0.077872879 | 215719_X_AT, 201565_S_AT, 2094 | 80 | 276  | 13528 | 3.0634058  | 1          | 0.52042557 | 72.1669518 |
| UP_SEQ_FEATURE  | short sequence motif:Nuclear localization signal               | 5  | 5.154639175 | 0.078800049 | 204917_S_AT, 213348_AT, 203588 | 96 | 325  | 19113 | 3.06298077 | 1          | 0.99376216 | 68.5896239 |
| UP_SEQ_FEATURE  | mutagenesis site                                               | 16 | 16.49484536 | 0.079798668 | 204589_AT, 212344_AT, 204635_A | 96 | 2045 | 19113 | 1.55770171 | 1          | 0.98890417 | 69.0666355 |
| INTERPRO        | IPR000355:Chemokine receptor                                   | 2  | 2.06185567  | 0.080398842 | 209201_X_AT, 217028_AT, 220351 | 88 | 16   | 16659 | 23.6633523 | 1          | 0.96826685 | 66.2696391 |
| GOTERM_MF_FAT   | GO:0016563~transcription activator activity                    | 6  | 6.18556701  | 0.080603865 | 213348_AT, 203920_AT, 219534_X | 74 | 410  | 12983 | 2.56750165 | 0.99999998 | 0.74764882 | 65.4991732 |
| SP_PIR_KEYWORDS | phosphoprotein                                                 | 44 | 45.36082474 | 0.080838352 | 203504_S_AT, 202704_AT, 204510 | 96 | 7263 | 19235 | 1.21382923 | 0.99999883 | 0.57406538 | 63.9401685 |
| COG_ONTOLOGY    | Cell division and chromosome partitioning                      | 3  | 3.092783505 | 0.082077528 | 212093_S_AT, 212796_S_AT, 2056 | 10 | 106  | 1950  | 5.51886792 | 0.40181432 | 0.40181432 | 33.6265738 |
| GOTERM_MF_FAT   | GO:0060589~nucleoside-triphosphatase regulator activity        | 6  | 6.18556701  | 0.082561725 | 204526_S_AT, 209051_S_AT, 2127 | 74 | 413  | 12983 | 2.54885151 | 0.99999999 | 0.73045357 | 66.4180635 |
| GOTERM_BP_FAT   | GO:0032369~negative regulation of lipid transport              | 2  | 2.06185567  | 0.084146161 | 203920_AT, 215775_AT           | 80 | 15   | 13528 | 22.5466667 | 1          | 0.5459229  | 75.0084826 |
| GOTERM_CC_FAT   | GO:0009986~cell surface                                        | 5  | 5.154639175 | 0.084240793 | 211538_S_AT, 215719_X_AT, 2042 | 62 | 348  | 12782 | 2.9620875  | 0.99998177 | 0.99572988 | 63.803062  |
| GOTERM_MF_FAT   | GO:0016493~C-C chemokine receptor activity                     | 2  | 2.06185567  | 0.086315523 | 209201_X_AT, 217028_AT, 220351 | 74 | 16   | 12983 | 21.9307432 | 1          | 0.72247207 | 68.1171118 |
| GOTERM_MF_FAT   | GO:0019957~C-C chemokine binding                               | 2  | 2.06185567  | 0.086315523 | 209201_X_AT, 217028_AT, 220351 | 74 | 16   | 12983 | 21.9307432 | 1          | 0.72247207 | 68.1171118 |
| GOTERM_BP_FAT   | GO:0009719~response to endogenous stimulus                     | 6  | 6.18556701  | 0.087891569 | 215719_X_AT, 204200_S_AT, 2160 | 80 | 405  | 13528 | 2.50518519 | 1          | 0.55906194 | 76.5729747 |
| GOTERM_BP_FAT   | GO:0031960~response to corticosteroid stimulus                 | 3  | 3.092783505 | 0.088172646 | 215719_X_AT, 203980_AT, 213910 | 80 | 85   | 13528 | 5.96823529 | 1          | 0.55703235 | 76.6866031 |
| GOTERM_BP_FAT   | GO:0009611~response to wounding                                | 7  | 7.216494845 | 0.089101363 | 204200_S_AT, 216061_X_AT, 2078 | 80 | 530  | 13528 | 2.23339623 | 1          | 0.55778654 | 77.0583882 |
| GOTERM_BP_FAT   | GO:0043535~regulation of blood vessel endothelial cell mi      | 2  | 2.06185567  | 0.089500446 | 204200_S_AT, 216061_X_AT, 2157 | 80 | 16   | 13528 | 21.1375    | 1          | 0.55629834 | 77.2164374 |
| SP_PIR_KEYWORDS | fusion protein                                                 | 2  | 2.06185567  | 0.089822831 | 205528_S_AT, 212151_AT         | 96 | 19   | 19235 | 21.0910088 | 0.99999976 | 0.59215586 | 67.9813159 |
| GOTERM_MF_FAT   | GO:0030291~protein serine/threonine kinase inhibitor acti      | 2  | 2.06185567  | 0.09145927  | 213348_AT, 219534_X_AT, 204159 | 74 | 17   | 12983 | 20.6406995 | 1          | 0.72109272 | 70.3168752 |
| GOTERM_MF_FAT   | GO:0016538~cyclin-dependent protein kinase regulator ac        | 2  | 2.06185567  | 0.09145927  | 213348_AT, 219534_X_AT, 204159 | 74 | 17   | 12983 | 20.6406995 | 1          | 0.72109272 | 70.3168752 |
| GOTERM_BP_FAT   | GO:0043193~positive regulation of gene-specific transcript     | 3  | 3.092783505 | 0.09172174  | 203920_AT, 208337_S_AT, 210174 | 80 | 87   | 13528 | 5.83103448 | 1          | 0.56243153 | 78.0776652 |
| GOTERM_BP_FAT   | GO:0006469~negative regulation of protein kinase activity      | 3  | 3.092783505 | 0.09172174  | 202540_S_AT, 207574_S_AT, 2039 | 80 | 87   | 13528 | 5.83103448 | 1          | 0.56243153 | 78.0776652 |
| GOTERM_BP_FAT   | GO:0035113~embryonic appendage morphogenesis                   | 3  | 3.092783505 | 0.09172174  | 208530_S_AT, 219825_AT, 212151 | 80 | 87   | 13528 | 5.83103448 | 1          | 0.56243153 | 78.0776652 |
| GOTERM_BP_FAT   | GO:0030326~embryonic limb morphogenesis                        | 3  | 3.092783505 | 0.09172174  | 208530_S_AT, 219825_AT, 212151 | 80 | 87   | 13528 | 5.83103448 | 1          | 0.56243153 | 78.0776652 |
| GOTERM_MF_FAT   | GO:0003677~DNA binding                                         | 19 | 19.58762887 | 0.092939979 | 201368_AT, 203588_S_AT, 203920 | 74 | 2331 | 12983 | 1.43006134 | 1          | 0.70541928 | 70.9236855 |
| BBID            | 71.id_proteins_G0-to-S_cell_cycle                              | 2  | 2.06185567  | 0.094525028 | 207826_S_AT, 201565_S_AT, 2139 | 8  | 5    | 358   | 17.9       | 0.72496127 | 0.72496127 | 48.1802448 |
| SP_PIR_KEYWORDS | nucleus                                                        | 28 | 28.86597938 | 0.09548723  | 201368_AT, 204917_S_AT, 219534 | 96 | 4283 | 19235 | 1.3098782  | 0.99999991 | 0.59474132 | 70.3109577 |
| GOTERM_MF_FAT   | GO:0046872~metal ion binding                                   | 30 | 30.92783505 | 0.095770289 | 201368_AT, 202688_AT, 217317_S | 74 | 4140 | 12983 | 1.27134743 | 1          | 0.69616896 | 72.0519002 |
| GOTERM_MF_FAT   | GO:0019207~kinase regulator activity                           | 3  | 3.092783505 | 0.096271362 | 213348_AT, 219534_X_AT, 204159 | 74 | 93   | 12983 | 5.65954664 | 1          | 0.67851305 | 72.2473849 |
| GOTERM_BP_FAT   | GO:0006350~transcription                                       | 18 | 18.55670103 | 0.097211579 | 204917_S_AT, 203588_S_AT, 2039 | 80 | 2101 | 13528 | 1.4487387  | 1          | 0.5814811  | 80.0771646 |
